# Supplementary material for: Loss of Schlafen3 influences the expression levels of Schlafen family members in ileum, thymus, and spleen tissue
Source: PeerJ. 2020 Jan 28;8:e8461. doi: 10.7717/peerj.8461 (PMC6993753; doi:10.7717/peerj.8461)
Supplement: Supplemental Information 1 [file peerj-08-8461-s001.xlsx]

## Sheet: Slfn1
	Matrix	Factor name	Position (strand)	Core score	Matrix score	Sequence	Experimental support
	V$BRCA_01	BRCA1	83115852 (+)	1	0.999	ttgTGTTG
	V$RFX1_01	RFX-related factors	83115911 (+)	0.982	0.938	cagaagctcaGGAACat
	V$RELA_Q6	NF-kappaB-related factor	83115936 (-)	1	0.986	cgggaaAGTCCa
	V$SOX10_Q3	Sox10	83115968 (-)	1	0.999	ggcATTGT
	V$HMGIY_Q3	HMGA factors	83116014 (-)	1	0.931	gcaacAAATTaacat
	V$DRI1_01	DRI1	83116020 (+)	1	1	aATTAA
	V$PIT1_Q6_01	POU1F1	83116023 (+)	1	0.978	taacATTCAt
	V$TBX5_01	TBX5	83116037 (+)	1	0.996	ataGGTGTtaag
	V$TTF1_Q5_01	TTF-1 (Nkx2.1)	83116105 (+)	1	1	CTTGAgt
	V$CPBP_Q6	KLF6	83116128 (+)	1	1	CCCCCag
	V$AP2ALPHA_03	AP-2	83116143 (+)	0.966	0.944	ccTGCCTgaggctga
	V$AP2ALPHA_03	AP-2	83116143 (-)	0.98	0.944	cctgcctgAGGCTga
	V$ING4_01	ING4	83116158 (-)	1	1	TGGTGg
	V$MYOGENIN_Q6_01	Myogenin group	83116175 (-)	1	1	cAGCTG
	V$MYOGENIN_Q6_01	Myogenin group	83116175 (+)	1	1	CAGCTg
	V$NFAT1_Q4	NFAT-related factors	83116229 (-)	1	1	tTTTCC
	V$P53_Q3	p53 related factors	83116235 (-)	0.993	0.985	cagGCTTGtcc
	V$ZNF333_01	ZNF333	83116361 (-)	1	1	ATTAT
	V$BRCA_01	BRCA1	83116409 (+)	0.997	0.996	ttgGGTTG
	V$IK_Q5_01	Ikaros	83116426 (-)	1	1	ccTCCCA
	V$GKLF_Q4	KLF4 group	83116535 (+)	1	1	CCTCCct
	V$NR3C1_03	GR-like receptors	83116558 (+)	0.979	0.849	gtgctcatgcTGTGCct
	V$GEN_INI_B	general initiator	83116636 (-)	0.993	0.986	GAGTGacg
	V$EBOX_Q6_01	Ebox	83116690 (-)	0.998	0.994	tgacAGGTGg
	V$SREBP_Q6	SREBP factors	83116749 (-)	0.991	0.981	tcctggAGTGAcatc
	V$ING4_01	ING4	83116922 (+)	1	1	cCACCA

## Sheet: Slfn2
	Matrix	Factor name	Position (strand)	Core score	Matrix score	Sequence	Experimental support
	V$TEF1_Q6_04	Tef-1-related factors	83064118 (+)	1	0.988	acATTCCttag
	V$AP1_Q6_02	AP-1	83064184 (+)	1	1	TGACTcat
	V$NFAT1_Q4	NFAT-related factors	83064240 (+)	1	1	GGAAAa
	V$POU2F1_Q6	POU domain group	83064281 (-)	1	0.99	tgATGCAaatat
	V$CRX_Q4_01	paired related HD factors	83064371 (-)	1	1	GATTAa
	V$MAF_Q4	MAF group	83064396 (+)	1	0.958	tctgAGTCAg
	V$ING4_01	ING4	83064423 (-)	1	1	TGGTGg
	V$GATA_Q6	GATA	83064575 (-)	1	1	cTTATCt
	V$FREAC3_01	FOXC	83064615 (-)	1	0.972	tctttaTTTACatttc
	V$POU2F1_Q6	POU domain group	83064618 (+)	0.96	0.972	ttattTACATtt
	V$REST_01	REST	83064646 (+)	0.83	0.872	tcctggtccTGGCCccggtcct
	V$CPBP_Q6	KLF6	83064657 (+)	1	1	GCCCCgg
	V$BLIMP1_Q4	Blimp-1	83064710 (-)	1	0.993	CTTTCccttccc
	V$CPBP_Q6	KLF6	83064727 (+)	1	1	CCCCCtc
	V$RREB1_01	RREB-1	83064734 (+)	0.901	0.855	tCCCACcccacccc
	V$MAZ_Q6_01	MAZ	83064735 (-)	0.984	0.975	cccaccCCACCccc
	V$RREB1_01	RREB-1	83064739 (+)	0.901	0.836	cCCCACcccccctc
	V$MAZ_Q6_01	MAZ	83064740 (-)	0.981	0.959	cccaccCCCCCtcc
	V$MAZ_Q6_01	MAZ	83064743 (-)	1	0.96	acccccCCTCCcca
	V$CPBP_Q6	KLF6	83064746 (+)	1	1	CCCCCtc
	V$MZF1_Q5	MZF1	83064750 (-)	1	1	cTCCCCa
	V$GKLF_Q4	KLF4 group	83064778 (-)	1	1	agGGAGG
	V$TBX5_01	TBX5	83064780 (+)	1	0.994	ggaGGTGTtact
	V$DMRT4_01	DMRT	83064789 (+)	1	0.932	actGTAACaaagt
	V$MECP2_02	MECP2	83064891 (-)	0.989	0.989	ttaaaCCCGG
	V$BBX_04	Bbx	83064917 (+)	1	0.954	aaggcGTTAAcaagggc
	V$CEBPA_Q6	C/EBP group	83064941 (+)	0.997	0.995	cttttgAGCAAat
	V$AP2ALPHA_03	AP-2	83064971 (+)	0.966	0.95	aaTGCCTgaggcaga
	V$AP2ALPHA_03	AP-2	83064971 (-)	0.966	0.95	aatgcctgAGGCAga
	V$BLIMP1_Q4	Blimp-1	83065052 (-)	1	1	CTTTCacttcct
	V$RELA_Q6	NF-kappaB-related factor	83065079 (+)	0.943	0.942	tGGGATttccag
	V$ING4_01	ING4	83065095 (+)	1	1	cCACCA
	V$NKX25_Q6	Nkx group	83065188 (-)	1	0.986	ttccAAGTGcc

## Sheet: Slfn3
	Matrix	Factor name	Position (strand)	Core score	Matrix score	Sequence	Experimental support
	V$ZNF333_01	ZNF333	83190358 (-)	1	1	ATTAT
	V$TBX5_01	TBX5	83190382 (-)	1	0.993	cgtgACACCtgt
	V$MUSCLEINI_B	muscle initiator	83190425 (+)	0.974	0.92	ttctgcctcCACACaacagcc
	V$FAC1_01	FAC1	83190433 (+)	1	0.939	ccacACAACagcca
	V$CPBP_Q6	KLF6	83190447 (-)	1	1	ctGGGGC
	V$SRY_Q6	Sox-related factors	83190473 (+)	1	1	TTGTTt
	V$BRCA_01	BRCA1	83190598 (-)	1	0.997	CAACAaaa
	V$MYOGENIN_Q6_01	Myogenin group	83190610 (+)	1	1	CAGCTg
	V$MYOGENIN_Q6_01	Myogenin group	83190610 (-)	1	1	cAGCTG
	V$ERALPHA_Q6_01	ER group (half-site)	83190644 (-)	1	1	caGGTCA
	V$CDC5_01	CDC5L	83190657 (+)	1	0.92	ggaTTAACatag
	V$CRX_Q4_01	paired related HD factors	83190658 (-)	1	1	GATTAa
	V$GKLF_Q4	KLF4 group	83190678 (-)	1	1	aaGGAGG
	V$CPBP_Q6	KLF6	83190713 (-)	1	1	gtGGGGC
	V$MAF_Q4	MAF group	83190785 (+)	1	0.972	gcagAGTCAg
	V$ERALPHA_Q6_01	ER group (half-site)	83190800 (-)	1	1	caGGTCA
	V$CPBP_Q6	KLF6	83190901 (+)	1	1	GCCCCag
	V$MYB_Q4	Myb-like factors	83190942 (+)	1	0.998	gagcCAGTTgtc
	V$ING4_01	ING4	83190968 (-)	1	1	TGGTGg
	V$CPBP_Q6	KLF6	83190994 (+)	1	1	CCCCCag
	V$CDX2_01	CDX group	83191012 (-)	1	0.977	tactTTTATgacctgc
	V$ERALPHA_Q6_01	ER group (half-site)	83191020 (+)	1	1	TGACCtg
	V$TATA_01	TBP-related factors	83191026 (-)	1	0.976	gctaatttTTTATaa
	V$CDX2_Q5_02	CDX group (half-site)	83191034 (+)	1	1	TTTATa
	V$ZNF333_01	ZNF333	83191037 (+)	1	1	ATAAT
	V$DMRT4_01	DMRT	83191037 (-)	0.995	0.929	ataatGCTACatt
	V$ZNF333_01	ZNF333	83191140 (+)	1	1	ATAAT
	V$MAF_Q4	MAF group	83191210 (-)	1	0.946	aTGACTgtgc
	V$GFI1_Q6_01	GFI1 factors	83191234 (-)	1	0.996	ctcTGATTtc
	V$IK_Q5_01	Ikaros	83191246 (-)	1	1	ccTCCCA
	V$CPBP_Q6	KLF6	83191293 (-)	1	1	ctGGGGG
	V$E2F_Q6_01	E2F related factors	83191325 (+)	1	0.995	ggcgCGCCAaaa
	V$AP2ALPHA_03	AP-2	83191336 (+)	0.966	0.902	aaTGCCTggggcctc
	V$AP2ALPHA_03	AP-2	83191336 (-)	0.864	0.902	aatgcctgGGGCCtc
	V$CPBP_Q6	KLF6	83191341 (-)	1	1	ctGGGGC
	V$CRX_Q4_01	paired related HD factors	83191421 (+)	1	1	cTAATC

## Sheet: Slfn4
	Matrix	Factor name	Position (strand)	Core score	Matrix score	Sequence	Experimental support
	V$ZNF333_01	ZNF333	83174330 (-)	1	1	ATTAT
	V$AHR_Q6	AhR	83174413 (-)	1	1	tGCGTG
	V$POU2F1_Q6	POU domain group	83174654 (+)	1	0.992	atattTGCATgt
	V$CPBP_Q6	KLF6	83174705 (+)	1	1	GCCCCtt
	V$IK_Q5_01	Ikaros	83174750 (-)	1	1	ccTCCCA
	V$CRX_Q4_01	paired related HD factors	83174849 (-)	1	1	GATTAa
	V$NFAT1_Q4	NFAT-related factors	83174863 (-)	1	1	tTTTCC
	V$ZNF333_01	ZNF333	83174881 (-)	1	1	ATTAT
	V$CDX2_Q5_02	CDX group (half-site)	83174883 (-)	1	1	tATAAA
	V$HMGIY_Q3	HMGA factors	83174889 (-)	1	0.954	tgagcAAATTtccct
	V$XVENT1_01	Xvent-1	83174890 (-)	1	0.919	gagCAAATttccc
	V$MAZ_Q6_01	MAZ	83174908 (-)	1	0.958	ttctccCCTCCccc
	V$CPBP_Q6	KLF6	83174917 (+)	1	1	CCCCCac
	V$TBX5_01	TBX5	83174929 (-)	1	0.985	ccttACACCtgt
	V$GFI1_Q6_01	GFI1 factors	83174944 (-)	1	1	ctgTGATTtc
	V$SRY_Q6	Sox-related factors	83174969 (+)	1	1	TTGTTt
	V$FREAC3_01	FOXC	83175006 (+)	0.8	0.874	aataaATAAAtaaaca
	V$SRY_Q6	Sox-related factors	83175017 (-)	1	1	aAACAA
	V$CP2_Q6	CP2-related factors	83175072 (-)	1	0.998	ttCCAGTcac
	V$SREBP_Q6	SREBP factors	83175116 (-)	0.991	0.98	tcctggAGTGAcgaa
	V$GEN_INI_B	general initiator	83175121 (-)	0.993	0.986	GAGTGacg
	V$CDX2_Q5_02	CDX group (half-site)	83175167 (-)	1	1	tATAAA
	V$YY1_Q6_03	YY1-like factors	83175199 (+)	1	1	CCATTtt
	V$BEN_01	BEN	83175210 (+)	1	0.999	CAGCGagc
	V$BEN_01	BEN	83175243 (+)	1	0.957	CAGCGgct
	V$BLIMP1_Q4	Blimp-1	83175326 (+)	1	0.985	ggcaaggGAAAG

## Sheet: Slfn5
	Matrix	Factor name	Position (strand)	Core score	Matrix score	Sequence	Experimental support
	V$CPBP_Q6	KLF6	82950915 (+)	1	1	CCCCCtc
	V$CPBP_Q6	KLF6	82950922 (+)	1	1	CCCCCat
	V$AP1_Q6_02	AP-1	82950927 (-)	1	1	atgAGTCA
	V$BLIMP1_Q4	Blimp-1	82951026 (+)	1	0.984	gagaaggGAAAG
	V$MYOGENIN_Q6_01	Myogenin group	82951044 (-)	1	1	cAGCTG
	V$MYOGENIN_Q6_01	Myogenin group	82951044 (+)	1	1	CAGCTg
	V$ZNF333_01	ZNF333	82951070 (-)	1	1	ATTAT
	V$CPBP_Q6	KLF6	82951107 (+)	1	1	CCCCCtt
	V$MZF1_Q5	MZF1	82951146 (+)	1	1	tGGGGAg
	V$FPM315_01	FPM315	82951146 (+)	1	0.986	tggGGAGGaggg
	V$CPBP_Q6	KLF6	82951171 (+)	1	1	CCCCCag
	V$CPBP_Q6	KLF6	82951189 (-)	1	1	ctGGGGG
	V$DR4_Q2	NR-DR (nuclear receptor direct repeat)	82951263 (-)	0.821	0.859	aaGGGCAggagaggaca
	V$MYB_Q4	Myb-like factors	82951274 (+)	1	0.998	aggaCAGTTggc
	V$TEF1_Q6_04	Tef-1-related factors	82951294 (-)	1	0.981	tggaGGAATgc
	V$SP100_04	Sp100	82951307 (+)	0.921	0.901	agGGTCGggaaatct
	V$COE1_Q6	Early B-Cell Factor-related factors	82951331 (-)	1	0.977	ttagccCCCTGgga
	V$CPBP_Q6	KLF6	82951335 (+)	1	1	CCCCCtg
	V$NFAT1_Q4	NFAT-related factors	82951354 (-)	1	1	tTTTCC
	V$GEN_INI_B	general initiator	82951368 (+)	0.993	0.994	cctCACTC
	V$CPBP_Q6	KLF6	82951423 (+)	1	1	CCCCCtt
	V$SP1_Q6_01	Sp1 group	82951494 (+)	1	0.973	agGGCGGggg
	V$CPBP_Q6	KLF6	82951497 (-)	1	1	gcGGGGG
	V$CHCH_01	Churchill	82951498 (+)	1	1	CGGGGg
	V$CPBP_Q6	KLF6	82951510 (-)	1	1	gcGGGGG
	V$CHCH_01	Churchill	82951511 (+)	1	1	CGGGGg
	V$RREB1_01	RREB-1	82951529 (-)	1	0.841	tggaacgtTTGGGg
	V$GKLF_Q4	KLF4 group	82951554 (-)	1	1	aaGGAGG
	V$YY1_Q6_03	YY1-like factors	82951566 (-)	1	1	aaAATGG
	V$CHCH_01	Churchill	82951593 (+)	1	1	CGGGGg
	V$CPBP_Q6	KLF6	82951598 (-)	1	1	gtGGGGG
	V$CREBP1_01	ATF-2 group	82951641 (+)	0.766	0.849	ATACGtaa
	V$CREBP1_01	ATF-2 group	82951641 (-)	1	0.874	ataCGTAA
	V$CDX2_01	CDX group	82951641 (+)	1	0.952	atacgtaATAAAaaaa
	V$GKLF_Q4	KLF4 group	82951662 (-)	1	1	aaGGAGG
	V$HMGIY_Q3	HMGA factors	82951669 (+)	1	0.933	gctttAATTTtctgc
	V$DRI1_01	DRI1	82951672 (-)	1	1	TTAATt
	V$SRY_Q6	Sox-related factors	82951687 (+)	1	1	TTGTTt
	V$NFAT1_Q4	NFAT-related factors	82951691 (-)	1	1	tTTTCC
	V$BEN_01	BEN	82951726 (-)	1	0.999	gatCGCTG
	V$GEN_INI_B	general initiator	82951785 (-)	0.995	0.995	AACTGagg
	V$RELA_Q6	NF-kappaB-related factor	82951791 (+)	1	0.94	gGGACTttcagg
	V$REST_01	REST	82951801 (-)	0.887	0.848	ggcaccgaGGAGAgggaccctg
	V$DR4_Q2	NR-DR (nuclear receptor direct repeat)	82951851 (-)	1	0.864	agGGTCAagtagggtcg
	V$RREB1_01	RREB-1	82951867 (-)	1	0.956	ggggaggtTTGGGg
	V$HNF1A_Q4	HNF1-like factors	82951920 (+)	1	0.941	taagaactATTAAcgc
	V$CPBP_Q6	KLF6	82951934 (+)	1	1	GCCCCtt

## Sheet: Slfn8
	Matrix	Factor name	Position (strand)	Core score	Matrix score	Sequence	Experimental support
	V$TBX5_01	TBX5	83020553 (-)	1	0.99	ggtcACACCtgg
	V$GEN_INI_B	general initiator	83020567 (+)	0.993	0.994	cctCACTC
	V$RFX1_01	RFX-related factors	83020603 (-)	0.982	0.974	ctGTTCCctggccacct
	V$TEF1_Q6_04	Tef-1-related factors	83020642 (-)	1	0.993	gacaGGAATgt
	V$BCL6_Q3_01	BCL-6 factors	83020665 (+)	0.95	0.96	cTTTCCagaa
	V$BEN_01	BEN	83020801 (+)	1	0.999	CAGCGaac
	V$AML3_Q6	Runt-related factors	83020823 (-)	1	1	ttGTGGTt
	V$NFAT1_Q4	NFAT-related factors	83020848 (+)	1	1	GGAAAa
	V$E2A_Q6_01	E2A group	83020874 (+)	0.995	0.996	ggcCAGCTgcagg
	V$MYOGENIN_Q6_01	Myogenin group	83020877 (+)	1	1	CAGCTg
	V$MYOGENIN_Q6_01	Myogenin group	83020877 (-)	1	1	cAGCTG
	V$CPBP_Q6	KLF6	83020955 (+)	1	1	CCCCCat
	V$ZNF333_01	ZNF333	83021058 (+)	1	1	ATAAT
	V$CREBP1_01	ATF-2 group	83021184 (+)	0.766	0.849	TTAGGtaa
	V$CREBP1_01	ATF-2 group	83021184 (-)	0.831	0.891	ttaGGTAA
	V$ZNF333_01	ZNF333	83021286 (+)	1	1	ATAAT
	V$POU6F1_02	POU6F1	83021290 (+)	1	0.91	tgtactAATGAgcacac
	V$ING4_01	ING4	83021311 (-)	1	1	TGGTGg
	V$CDPCR1_01	CDP	83021375 (-)	0.929	0.924	gctaTCAATg
	V$ZNF333_01	ZNF333	83021409 (+)	1	1	ATAAT
	V$DRI1_01	DRI1	83021428 (-)	1	1	TTAATt
	V$DRI1_01	DRI1	83021430 (+)	1	1	aATTAA
	V$MAF_Q4	MAF group	83021508 (+)	1	0.972	gcagAGTCAg
	V$LRH1_Q5_01	LRH-1 group	83021524 (+)	1	0.996	tttCAAGGcca
	V$SF1_Q5_01	SF-1 group	83021526 (-)	1	0.996	tCAAGGcca

## Sheet: Slfn9
	Matrix	Factor name	Position (strand)	Core score	Matrix score	Sequence	Experimental support
	V$BEN_01	BEN	82991616 (-)	1	0.999	gatCGCTG
	V$TEF1_Q6_04	Tef-1-related factors	82991660 (-)	1	0.994	ggcaGGAATgt
	V$AP2ALPHA_03	AP-2	82991694 (+)	0.98	0.887	tcAGCCTccggccca
	V$AP2ALPHA_03	AP-2	82991694 (-)	0.855	0.887	tcagcctcCGGCCca
	V$HSF1_01	HSF dimer	82991708 (-)	0.998	0.984	agaatCTTCT
	V$EBOX_Q6_01	Ebox	82991725 (-)	0.998	0.996	ggccAGGTGg
	V$CPBP_Q6	KLF6	82991782 (+)	1	1	GCCCCgg
	V$BEN_01	BEN	82991819 (+)	1	0.961	CAGCGaat
	V$SRY_Q6	Sox-related factors	82991856 (+)	1	1	TTGTTt
	V$NFAT1_Q4	NFAT-related factors	82991865 (+)	1	1	GGAAAa
	V$NFAT1_Q4	NFAT-related factors	82991958 (-)	1	1	tTTTCC
	V$GATA_Q6	GATA	82991964 (+)	1	1	aGATAAg
	V$CPBP_Q6	KLF6	82991971 (+)	1	1	CCCCCat
	V$GKLF_Q4	KLF4 group	82991997 (+)	1	1	CCTCCct
	V$CPBP_Q6	KLF6	82992033 (-)	1	1	gaGGGGG
	V$CPBP_Q6	KLF6	82992087 (-)	1	1	ctGGGGG
	V$BBX_04	Bbx	82992156 (-)	1	0.963	accactgTTAACccctg
	V$BBX_04	Bbx	82992157 (+)	1	0.936	ccactGTTAAcccctgg
	V$BBX_04	Bbx	82992226 (+)	1	0.98	acatgGTTAAcaccgtt
	V$MYB_05	Myb-like factors	82992231 (+)	1	0.922	gttaacaCCGTTaactg
	V$BBX_04	Bbx	82992235 (+)	1	0.922	acaccGTTAActgcatc
	V$NFAT1_Q4	NFAT-related factors	82992280 (-)	1	1	tTTTCC
	V$ING4_01	ING4	82992322 (+)	1	1	cCACCA
	V$NFAT1_Q4	NFAT-related factors	82992353 (-)	1	1	tTTTCC
	V$SRY_Q6	Sox-related factors	82992523 (-)	1	1	aAACAA
	V$SRY_Q6	Sox-related factors	82992528 (-)	1	1	aAACAA
	V$RFX1_01	RFX-related factors	82992597 (+)	0.992	0.931	ttgtaccagaGTAACac

## Sheet: All TF listed
	Matrix	Factor	Consensus sequence	Classification	Category	Experimental support	Sites	Sequences	Sites/Sequences	>>
	V$CPBP_Q6	KLF6		ZFC2H2	matrix compiled from individual genomic sites		54	9	6
	V$NFAT1_Q4	NFAT-related factors		REL	matrix compiled from individual genomic sites		19	8	2.38
	V$ZNF333_01	ZNF333		ZFC2H2	SELEX (CASTing, SAAB, TDA, Target detection assay)		18	7	2.57
	V$SRY_Q6	Sox-related factors		HMG	matrix compiled from individual genomic sites		10	6	1.67
	V$ING4_01	ING4		ZFPHD	ChIP-on-chip		8	6	1.33
	V$CRX_Q4_01	paired related HD factors		HOX	matrix compiled from individual genomic sites		7	5	1.4
	V$GKLF_Q4	KLF4 group		ZFC2H2	matrix compiled from individual genomic sites		6	5	1.2
	V$IK_Q5_01	Ikaros		ZFC2H2	matrix compiled from individual genomic sites		5	5	1		downregulated in both, more in F
	V$TBX5_01	TBX5		TBX	SELEX (CASTing, SAAB, TDA, Target detection assay)		5	5	1
	V$DRI1_01	DRI1		ARID	SELEX (CASTing, SAAB, TDA, Target detection assay)		9	4	2.25
	V$AP2ALPHA_03	AP-2		BHSH	SELEX (CASTing, SAAB, TDA, Target detection assay)		8	4	2
	V$MYOGENIN_Q6_01	Myogenin group		BHLH	matrix compiled from individual genomic sites		8	4	2
	V$BEN_01	BEN		BHLH	SELEX (CASTing, SAAB, TDA, Target detection assay)		6	4	1.5
	V$BLIMP1_Q4	Blimp-1		ZFC2H2	matrix compiled from individual genomic sites		5	4	1.25
	V$GEN_INI_B	general initiator		GENINI	matrix compiled from individual genomic sites		5	4	1.25
	V$TEF1_Q6_04	Tef-1-related factors		TEA	matrix compiled from individual genomic sites		4	4	1
	V$CDX2_Q5_02	CDX group (half-site)		HOX	matrix compiled from individual genomic sites		8	3	2.67
	V$MAF_Q4	MAF group		BZIP	matrix compiled from individual genomic sites		4	3	1.33
	V$CDPCR1_01	CDP		HOX	SELEX (CASTing, SAAB, TDA, Target detection assay)		4	3	1.33
	V$RELA_Q6	NF-kappaB-related factor		REL	matrix compiled from individual genomic sites		3	3	1
	V$EBOX_Q6_01	Ebox		BHLH	matrix compiled from individual genomic sites		3	3	1
	V$FREAC3_01	FOXC		FORKHEAD	SELEX (CASTing, SAAB, TDA, Target detection assay)		3	3	1
	V$RFX1_01	RFX-related factors		RFX	SELEX (CASTing, SAAB, TDA, Target detection assay)		3	3	1
	V$HMGIY_Q3	HMGA factors		ATHOOK	matrix compiled from individual genomic sites		3	3	1
	V$TTF1_Q5_01	TTF-1 (Nkx2.1)		HOX	matrix compiled from individual genomic sites		3	3	1
	V$BBX_04	Bbx		HMG	universal protein binding microarrays (PBM)		5	2	2.5
	V$RREB1_01	RREB-1		ZFC2H2	SELEX (CASTing, SAAB, TDA, Target detection assay)		4	2	2
	V$CREBP1_01	ATF-2 group		BZIP	SELEX (CASTing, SAAB, TDA, Target detection assay)		4	2	2
	V$XVENT1_01	Xvent-1		HOX	SELEX (CASTing, SAAB, TDA, Target detection assay)		4	2	2
	V$ERALPHA_01	ER group		ZFC4-NR	ChIP-on-chip		4	2	2
	V$TATA_01	TBP-related factors		TBP	compiled matrix imported from literature reference		4	2	2
	V$MAZ_Q6_01	MAZ		ZFC2H2	matrix compiled from individual genomic sites		4	2	2
	V$NR3C1_03	GR-like receptors		ZFC4-NR	HT-SELEX		3	2	1.5
	V$POU2F1_Q6	POU domain group		HOX	matrix compiled from individual genomic sites		3	2	1.5
	V$BRCA_01	BRCA1		ZFRING	SELEX (CASTing, SAAB, TDA, Target detection assay)		3	2	1.5
	V$PIT1_Q6_01	POU1F1		HOX	matrix compiled from individual genomic sites		3	2	1.5
	V$AP1_Q6_02	AP-1		BZIP	matrix compiled from individual genomic sites		2	2	1
	V$SREBP_Q6	SREBP factors		BHLH	matrix compiled from individual genomic sites		2	2	1
	V$MZF1_Q5	MZF1		ZFC2H2	matrix compiled from individual genomic sites		2	2	1
	V$CDX2_01	CDX group		HOX	universal protein binding microarrays (PBM)		2	2	1
	V$POU6F1_02	POU6F1		HOX	universal protein binding microarrays (PBM)		2	2	1
	V$REST_01	REST		ZFC2H2	ChIP-Seq		2	2	1
	V$DMRT4_01	DMRT		DMRT	SELEX (CASTing, SAAB, TDA, Target detection assay)		2	2	1
	V$GFI1_Q6_01	GFI1 factors		ZFC2H2	matrix compiled from individual genomic sites		2	2	1
	V$YY1_Q6_03	YY1-like factors		ZFC2H2	matrix compiled from individual genomic sites		2	2	1
	V$SOX10_Q3	Sox10		HMG	matrix compiled from individual genomic sites		2	2	1
	V$MYB_Q4	Myb-like factors		MYB	matrix compiled from individual genomic sites		2	2	1
	V$FAC1_01	FAC1		ZFPHD	SELEX (CASTing, SAAB, TDA, Target detection assay)		2	2	1
	V$SP1_Q6_01	Sp1 group		ZFC2H2	matrix compiled from individual genomic sites		2	2	1
	V$GATA_Q6	GATA		ZFGATA	matrix compiled from individual genomic sites		2	2	1
	V$ERALPHA_Q6_01	ER group (half-site)		ZFC4-NR	matrix compiled from individual genomic sites		3	1	3
	V$CHCH_01	Churchill		CHCH	SELEX (CASTing, SAAB, TDA, Target detection assay)		3	1	3
	V$DR4_Q2	NR-DR (nuclear receptor direct repeat)		ZFC4-NR	matrix compiled from individual genomic sites		2	1	2
	V$P53_Q3	p53 related factors		P53	matrix compiled from individual genomic sites		1	1	1
	V$FPM315_01	FPM315		ZFC2H2	ChIP-Seq		1	1	1
	V$MECP2_02	MECP2		ATHOOK	SELEX (CASTing, SAAB, TDA, Target detection assay)		1	1	1
	V$HSF1_01	HSF dimer		HSF	SELEX (CASTing, SAAB, TDA, Target detection assay)		1	1	1
	V$BCL6_Q3_01	BCL-6 factors		ZFC2H2	matrix compiled from individual genomic sites		1	1	1
	V$SP100_04	Sp100		SAND	universal protein binding microarrays (PBM)		1	1	1
	V$ZFP161_04	ZFP161		ZFC2H2	universal protein binding microarrays (PBM)		1	1	1
	V$E2A_Q6_01	E2A group		BHLH	matrix compiled from individual genomic sites		1	1	1
	V$REST_Q5	REST		ZFC2H2	matrix compiled from individual genomic sites		1	1	1
	V$HNF1A_Q4	HNF1-like factors		HOX	matrix compiled from individual genomic sites		1	1	1
	V$LRH1_Q5_01	LRH-1 group		ZFC4-NR	matrix compiled from individual genomic sites		1	1	1
	V$NKX25_Q6	Nkx group		HOX	matrix compiled from individual genomic sites		1	1	1
	V$MUSCLEINI_B	muscle initiator		GENINI	matrix compiled from individual genomic sites		1	1	1
	V$SMAD4_Q6_01	SMAD factors		SMAD	matrix compiled from individual genomic sites		1	1	1
	V$MYB_05	Myb-like factors		MYB	universal protein binding microarrays (PBM)		1	1	1
	V$COE1_Q6	Early B-Cell Factor-related factors		REL	matrix compiled from individual genomic sites		1	1	1
	V$E2F_Q6_01	E2F related factors		E2F	matrix compiled from individual genomic sites		1	1	1
	V$SF1_Q5_01	SF-1 group		ZFC4-NR	matrix compiled from individual genomic sites		1	1	1
	V$IRF1_Q5	IRF factors		IRF	matrix compiled from individual genomic sites		1	1	1
	V$AML3_Q6	Runt-related factors		RUNT	matrix compiled from individual genomic sites		1	1	1
	V$CDC5_01	CDC5L		MYB	SELEX (CASTing, SAAB, TDA, Target detection assay)		1	1	1
	V$AHR_Q6	AhR		BHLH	matrix compiled from individual genomic sites		1	1	1
	V$CP2_Q6	CP2-related factors		GRAINY	matrix compiled from individual genomic sites		1	1	1
	V$CEBPA_Q6	C/EBP group		BZIP	matrix compiled from individual genomic sites		1	1	1
