# Supplementary material for: Loss of Schlafen3 influences the expression levels of Schlafen family members in ileum, thymus, and spleen tissue
Source: PeerJ. 2020 Jan 28;8:e8461. doi: 10.7717/peerj.8461 (PMC6993753; doi:10.7717/peerj.8461)
Supplement: Supplemental Information 3 [file peerj-08-8461-s003.xlsx]

## Sheet: 20190330_SLFN3KO TSI P5
File Name	20190330_SLFN3KO TSI P5.pcrd
Created By User
Notes
ID
Run Started	03/30/2019 19:05:48 UTC
Run Ended	03/30/2019 20:16:43 UTC
Sample Vol	20
Lid Temp	105
Protocol File Name	Unknown.prcl
Plate Setup File Name	DefaultPlate.pltd
Base Serial Number	CT031118
Optical Head Serial Number	785BR9482
CFX Manager Version	3.1.1517.0823.
Well group	All Wells
Amplification step	3
Melt step
Well	Fluor	Target	Sex/Genotype	ID	Sample	Cq	Starting Quantity (SQ)
B01	HEX	RPLP0			Ileum	22.6895
B02	HEX	RPLP0			Ileum	22.7933
B03	HEX	RPLP0			Ileum	22.9286
B04	HEX	RPLP0			Ileum	22.9846
B05	HEX	RPLP0			Ileum	23.2846
B06	HEX	RPLP0			Ileum	23.3126
B11	HEX	RPLP0			Ileum	23.9429
B12	HEX	RPLP0			Ileum	24.0863
C01	HEX	RPLP0			Ileum	22.9991
C02	HEX	RPLP0			Ileum	22.8089
C03	HEX	RPLP0			Ileum	22.9613
C04	HEX	RPLP0			Ileum	23.0227
C05	HEX	RPLP0			Ileum	23.248
C06	HEX	RPLP0			Ileum	23.2976
C11	HEX	RPLP0			Ileum	23.8436
C12	HEX	RPLP0			Ileum	24.1524
D01	HEX	RPLP0			Ileum	22.9662
D02	HEX	RPLP0			Ileum	22.7261
D03	HEX	RPLP0			Ileum	23.0057
D04	HEX	RPLP0			Ileum	23.0517
D05	HEX	RPLP0			Ileum	23.3357
D06	HEX	RPLP0			Ileum	23.3743
D11	HEX	RPLP0			Ileum	24.0666
D12	HEX	RPLP0			Ileum	24.1611
F01	HEX	RPLP0			Ileum	22.4905
F02	HEX	RPLP0			Ileum	22.3266
F03	HEX	RPLP0			Ileum	22.5185
F04	HEX	RPLP0			Ileum	22.6269
F05	HEX	RPLP0			Ileum	22.5859
F06	HEX	RPLP0			Ileum	22.6437
G01	HEX	RPLP0			Ileum	22.9073
G02	HEX	RPLP0			Ileum	22.5658
G03	HEX	RPLP0			Ileum	22.7582
G04	HEX	RPLP0			Ileum	22.7986
G05	HEX	RPLP0			Ileum	22.9722
G06	HEX	RPLP0			Ileum	23.0468
H01	HEX	RPLP0			Ileum	22.8318
H02	HEX	RPLP0			Ileum	22.589
H03	HEX	RPLP0			Ileum	23.0621
H04	HEX	RPLP0			Ileum	22.9567
H05	HEX	RPLP0			Ileum	23.1638
H06	HEX	RPLP0			Ileum	23.1538
B07	HEX	RPLP0			Spleen	21.6597
B08	HEX	RPLP0			Spleen	21.5605
C07	HEX	RPLP0			Spleen	21.6542
C08	HEX	RPLP0			Spleen	21.7752
D07	HEX	RPLP0			Spleen	21.5497
D08	HEX	RPLP0			Spleen	21.7454
B09	HEX	RPLP0			Thymus	21.5914
B10	HEX	RPLP0			Thymus	21.3469
C09	HEX	RPLP0			Thymus	21.7325
C10	HEX	RPLP0			Thymus	21.4782
D09	HEX	RPLP0			Thymus	21.6679
D10	HEX	RPLP0			Thymus	21.6374
B01	FAM	Slfn1	F KO	94	Ileum	30.5702	22.6895
B02	FAM	Slfn1			Ileum	30.4954	22.7933
B03	FAM	Slfn1	F KO	95	Ileum	28.3011	22.9286
B04	FAM	Slfn1			Ileum	28.3414	22.9846
B05	FAM	Slfn1	F KO	96	Ileum	28.6508	23.2846
B06	FAM	Slfn1			Ileum	28.7746	23.3126
B11	FAM	Slfn1	M WT	98	Ileum	29.1596	23.9429
B12	FAM	Slfn1			Ileum	29.2231	24.0863
F01	FAM	Slfn1	M WT	99	Ileum	28.4077	22.4905
F02	FAM	Slfn1			Ileum	28.1919	22.3266
F03	FAM	Slfn1	M WT	1	Ileum	27.4758	22.5185
F04	FAM	Slfn1			Ileum	27.489	22.6269
F05	FAM	Slfn1	F WT	6	Ileum	27.282	22.5859
F06	FAM	Slfn1			Ileum	27.3285	22.6437
B07	FAM	Slfn1	F WT	6	Spleen	25.8134	21.6597
B08	FAM	Slfn1			Spleen	25.8227	21.5605
B09	FAM	Slfn1	F WT	6	Thymus	23.6778	21.5914
B10	FAM	Slfn1			Thymus	23.6512	21.3469
A01	HEX	Slfn2	F KO	94	Ileum	25.411	22.6895
A02	HEX	Slfn2			Ileum	25.4978	22.7933
A03	HEX	Slfn2	F KO	95	Ileum	23.222	22.9286
A04	HEX	Slfn2			Ileum	23.1484	22.9846
A05	HEX	Slfn2	F KO	96	Ileum	23.3969	23.2846
A06	HEX	Slfn2			Ileum	23.2566	23.3126
A11	HEX	Slfn2	M WT	98	Ileum	23.0082	23.9429
A12	HEX	Slfn2			Ileum	22.8741	24.0863
E01	HEX	Slfn2	M WT	99	Ileum	22.836	22.4905
E02	HEX	Slfn2			Ileum	22.6833	22.3266
E03	HEX	Slfn2	M WT	1	Ileum	23.5174	22.5185
E04	HEX	Slfn2			Ileum	23.3873	22.6269
E05	HEX	Slfn2	F WT	6	Ileum	21.4473	22.5859
E06	HEX	Slfn2			Ileum	21.453	22.6437
A07	HEX	Slfn2	F WT	6	Spleen	22.0861	21.6597
A08	HEX	Slfn2			Spleen	22.1652	21.5605
A09	HEX	Slfn2	F WT	6	Thymus	20.3919	21.5914
A10	HEX	Slfn2			Thymus	20.4371	21.3469
C01	FAM	Slfn3	F KO	94	Ileum	26.9607	22.9991
C02	FAM	Slfn3			Ileum	27.0022	22.8089
C03	FAM	Slfn3	F KO	95	Ileum	42.0632	22.9613
C04	FAM	Slfn3			Ileum	42.328	23.0227
C05	FAM	Slfn3	F KO	96	Ileum	42.1324	23.248
C06	FAM	Slfn3			Ileum	37.8068	23.2976
C11	FAM	Slfn3	M WT	98	Ileum	30.1226	23.8436
C12	FAM	Slfn3			Ileum	30.2173	24.1524
G01	FAM	Slfn3	M WT	99	Ileum	39.8743	22.9073
G02	FAM	Slfn3			Ileum	41.9129	22.5658
G03	FAM	Slfn3	M WT	1	Ileum	28.7864	22.7582
G04	FAM	Slfn3			Ileum	28.7023	22.7986
G05	FAM	Slfn3	F WT	6	Ileum	27.5483	22.9722
G06	FAM	Slfn3			Ileum	27.5575	23.0468
C07	FAM	Slfn3	F WT	6	Spleen	22.6395	21.6542
C08	FAM	Slfn3			Spleen	22.8032	21.7752
C09	FAM	Slfn3	F WT	6	Thymus	23.021	21.7325
C10	FAM	Slfn3			Thymus	22.6022	21.4782
D01	Cy5	Slfn4	F KO	94	Ileum	25.1671	22.9662
D02	Cy5	Slfn4			Ileum	25.104	22.7261
D03	Cy5	Slfn4	F KO	95	Ileum	24.1653	23.0057
D04	Cy5	Slfn4			Ileum	24.0978	23.0517
D05	Cy5	Slfn4	F KO	96	Ileum	24.1921	23.3357
D06	Cy5	Slfn4			Ileum	24.1648	23.3743
D11	Cy5	Slfn4	M WT	98	Ileum	24.0241	24.0666
D12	Cy5	Slfn4			Ileum	23.9693	24.1611
H01	Cy5	Slfn4	M WT	99	Ileum	23.2151	22.8318
H02	Cy5	Slfn4			Ileum	23.1583	22.589
H03	Cy5	Slfn4	M WT	1	Ileum	24.6527	23.0621
H04	Cy5	Slfn4			Ileum	24.6111	22.9567
H05	Cy5	Slfn4	F WT	6	Ileum	22.731	23.1638
H06	Cy5	Slfn4			Ileum	22.6008	23.1538
D07	Cy5	Slfn4	F WT	6	Spleen	29.0198	21.5497
D08	Cy5	Slfn4			Spleen	29.1724	21.7454
D09	Cy5	Slfn4	F WT	6	Thymus	28.4056	21.6679
D10	Cy5	Slfn4			Thymus	28.4631	21.6374
A01	Cy5	Slfn5	F KO	94	Ileum	29.2725	22.6895
A02	Cy5	Slfn5			Ileum	29.3956	22.7933
A03	Cy5	Slfn5	F KO	95	Ileum	27.4506	22.9286
A04	Cy5	Slfn5			Ileum	27.4732	22.9846
A05	Cy5	Slfn5	F KO	96	Ileum	27.3708	23.2846
A06	Cy5	Slfn5			Ileum	27.3137	23.3126
A11	Cy5	Slfn5	M WT	98	Ileum	27.1282	23.9429
A12	Cy5	Slfn5			Ileum	27.0891	24.0863
E01	Cy5	Slfn5	M WT	99	Ileum	26.7433	22.4905
E02	Cy5	Slfn5			Ileum	26.5328	22.3266
E03	Cy5	Slfn5	M WT	1	Ileum	28.0364	22.5185
E04	Cy5	Slfn5			Ileum	28.1139	22.6269
E05	Cy5	Slfn5	F WT	6	Ileum	25.2914	22.5859
E06	Cy5	Slfn5			Ileum	25.26	22.6437
A07	Cy5	Slfn5	F WT	6	Spleen	26.3802	21.6597
A08	Cy5	Slfn5			Spleen	26.3187	21.5605
A09	Cy5	Slfn5	F WT	6	Thymus	25.0642	21.5914
A10	Cy5	Slfn5			Thymus	25.0511	21.3469
A01	FAM	Slfn8	F KO	94	Ileum	23.5412	22.6895
A02	FAM	Slfn8			Ileum	23.5202	22.7933
A03	FAM	Slfn8	F KO	95	Ileum	24.5207	22.9286
A04	FAM	Slfn8			Ileum	24.5365	22.9846
A05	FAM	Slfn8	F KO	96	Ileum	24.8104	23.2846
A06	FAM	Slfn8			Ileum	24.811	23.3126
A11	FAM	Slfn8	M WT	98	Ileum	24.8829	23.9429
A12	FAM	Slfn8			Ileum	24.7555	24.0863
E01	FAM	Slfn8	M WT	99	Ileum	23.8479	22.4905
E02	FAM	Slfn8			Ileum	23.4744	22.3266
E03	FAM	Slfn8	M WT	1	Ileum	22.8607	22.5185
E04	FAM	Slfn8			Ileum	22.8767	22.6269
E05	FAM	Slfn8	F WT	6	Ileum	23.2294	22.5859
E06	FAM	Slfn8			Ileum	23.3191	22.6437
A07	FAM	Slfn8	F WT	6	Spleen	23.1053	21.6597
A08	FAM	Slfn8			Spleen	23.1736	21.5605
A09	FAM	Slfn8	F WT	6	Thymus	22.6301	21.5914
A10	FAM	Slfn8			Thymus	22.422	21.3469
B01	Cy5	Slfn9	F KO	94	Ileum	24.6185	22.6895
B02	Cy5	Slfn9			Ileum	24.5289	22.7933
B03	Cy5	Slfn9	F KO	95	Ileum	25.3212	22.9286
B04	Cy5	Slfn9			Ileum	25.4748	22.9846
B05	Cy5	Slfn9	F KO	96	Ileum	25.8675	23.2846
B06	Cy5	Slfn9			Ileum	26.0263	23.3126
B11	Cy5	Slfn9	M WT	98	Ileum	26.0462	23.9429
B12	Cy5	Slfn9			Ileum	26.0926	24.0863
F01	Cy5	Slfn9	M WT	99	Ileum	25.1686	22.4905
F02	Cy5	Slfn9			Ileum	25.0087	22.3266
F03	Cy5	Slfn9	M WT	1	Ileum	24.2831	22.5185
F04	Cy5	Slfn9			Ileum	24.348	22.6269
F05	Cy5	Slfn9	F WT	6	Ileum	24.6795	22.5859
F06	Cy5	Slfn9			Ileum	24.5793	22.6437
B07	Cy5	Slfn9	F WT	6	Spleen	24.4328	21.6597
B08	Cy5	Slfn9			Spleen	24.5066	21.5605
B09	Cy5	Slfn9	F WT	6	Thymus	23.9844	21.5914
B10	Cy5	Slfn9			Thymus	23.8569	21.3469
