# Supplementary material for: Loss of Schlafen3 influences the expression levels of Schlafen family members in ileum, thymus, and spleen tissue
Source: PeerJ. 2020 Jan 28;8:e8461. doi: 10.7717/peerj.8461 (PMC6993753; doi:10.7717/peerj.8461)
Supplement: Supplemental Information 6 [file peerj-08-8461-s006.xlsx]

## Sheet: 20190330_SLFN3KO ILEUM P3
File Name	20190330_SLFN3KO ILEUM P3.pcrd
Created By User
Notes
ID
Run Started	03/30/2019 16:35:58 UTC
Run Ended	03/30/2019 17:49:03 UTC
Sample Vol	20
Lid Temp	105
Protocol File Name	Unknown.prcl
Plate Setup File Name	DefaultPlate.pltd
Base Serial Number	CT031118
Optical Head Serial Number	785BR9482
CFX Manager Version	3.1.1517.0823.
Well group	All Wells
Amplification step	3
Melt step
Well	Fluor	Target	Sex/Genotype	ID	Sample	Cq	Starting Quantity (SQ)	dCt	Ave. dCt			Male	Ave. dCt	5.23478
B01	FAM	Slfn1	F WT	62	Ileum	32.2819	23.7505	8.5314	8.11926			Slfn1	dCt	ddCt	Fold Change	Ave. Fold	Std dev	Ttest
B02	FAM	Slfn1			Ileum	31.4592	23.7521	7.70712			M WT	75	5.00709	-0.227694	1.17096	1.15391	0.585086
B03	FAM	Slfn1	M KO	66	Ileum	29.9062	24.0019	5.90433	6.1929		M WT	86	6.8259	1.59111	0.331915
B04	FAM	Slfn1			Ileum	30.1201	23.6386	6.48148			M WT	88	4.25442	-0.980357	1.97295
B05	FAM	Slfn1	F KO	69	Ileum	29.1144	23.4191	5.69525	5.69487		M WT	99	5.17677	-0.0580114	1.04103
B06	FAM	Slfn1			Ileum	29.085	23.3905	5.6945			M WT	1	4.90973	-0.325053	1.25271
B07	FAM	Slfn1	M KO	72	Ileum	28.4142	23.9146	4.49954	4.5345		M KO	66	6.1929	0.95812	0.514727	0.730236	0.631431	0.331504
B08	FAM	Slfn1			Ileum	28.449	23.8795	4.56946			M KO	72	4.5345	-0.700281	1.62482
B09	FAM	Slfn1	M WT	75	Ileum	27.3503	22.889	4.46132	5.00709		M KO	91	8.0013	2.76652	0.146958
B10	FAM	Slfn1			Ileum	27.9111	22.3582	5.55286			M KO	98	5.89123	0.656452	0.634436
B11	FAM	Slfn1	F KO	76	Ileum	33.7127	23.308	10.4047	10.3149
B12	FAM	Slfn1			Ileum	33.8097	23.5845	10.2251				Female	Ave. dCt	6.68425
F01	FAM	Slfn1	F KO	94	Ileum	29.1443	23.6998	5.44448	5.2913			Slfn1	dCt	ddCt	Fold Change	Ave. Fold	Std dev	Ttest
F02	FAM	Slfn1			Ileum	29.0374	23.8993	5.13813			F WT	62	8.11926	1.43501	0.369845	1.56983	1.68292
F03	FAM	Slfn1	F WT	79	Ileum	29.4815	23.6274	5.85404	6.13595		F WT	79	6.13595	-0.548303	1.46236
F04	FAM	Slfn1			Ileum	29.9357	23.5179	6.41785			F WT	77	7.79136	1.10711	0.464223
F05	FAM	Slfn1	F KO	80	Ileum	29.6009	23.0051	6.59574	7.07545		F WT	6	4.69044	-1.99381	3.98288
F06	FAM	Slfn1			Ileum	30.6001	23.0449	7.55517			F KO	69	5.69487	-0.989379	1.98533	1.72711	1.05605	0.858812
F07	FAM	Slfn1	M WT	86	Ileum	30.4698	22.6042	7.8656	6.8259		F KO	76	10.3149	3.63063	0.0807365
F08	FAM	Slfn1			Ileum	28.7761	22.9899	5.78619			F KO	94	5.2913	-1.39295	2.62615
F09	FAM	Slfn1	M WT	88	Ileum	28.2897	24.0036	4.28617	4.25442		F KO	80	7.07545	0.3912	0.762495
F10	FAM	Slfn1			Ileum	28.2694	24.0467	4.22268			F KO	95	5.36464	-1.31961	2.49598
F11	FAM	Slfn1	M KO	91	Ileum	33.0378	24.2168	8.82099	8.0013		F KO	96	5.41405	-1.2702	2.41195
F12	FAM	Slfn1			Ileum	31.6016	24.42	7.18161
B01	FAM	Slfn1	F WT	77	Ileum	30.5702	22.6895	7.88066	7.79136
B02	FAM	Slfn1			Ileum	30.4954	22.7933	7.70207
B03	FAM	Slfn1	F KO	95	Ileum	28.3011	22.9286	5.3725	5.36464
B04	FAM	Slfn1			Ileum	28.3414	22.9846	5.35679
B05	FAM	Slfn1	F KO	96	Ileum	28.6508	23.2846	5.36616	5.41405
B06	FAM	Slfn1			Ileum	28.7746	23.3126	5.46194
B11	FAM	Slfn1	M WT	99	Ileum	29.1596	23.9429	5.21675	5.17677
B12	FAM	Slfn1			Ileum	29.2231	24.0863	5.13679
F01	FAM	Slfn1	M KO	98	Ileum	28.4077	22.4905	5.91719	5.89123
F02	FAM	Slfn1			Ileum	28.1919	22.3266	5.86528
F03	FAM	Slfn1	M WT	1	Ileum	27.4758	22.5185	4.95732	4.90973
F04	FAM	Slfn1			Ileum	27.489	22.6269	4.86214
F05	FAM	Slfn1	F WT	6	Ileum	27.282	22.5859	4.69609	4.69044
F06	FAM	Slfn1			Ileum	27.3285	22.6437	4.68479				Male	Ave. dCt	-0.796376
A01	HEX	Slfn2	F WT	62	Ileum	21.7872	23.7505	-1.96325	-1.89998			Slfn2	dCt	ddCt	Fold Change	Ave. Fold	Std dev	Ttest
A02	HEX	Slfn2			Ileum	21.9154	23.7521	-1.8367			M WT	75	-2.02475	-1.22837	2.34303	1.39381	1.08512
A03	HEX	Slfn2	M KO	66	Ileum	25.059	24.0019	1.05714	1.2284		M WT	86	0.456207	1.25258	0.419696
A04	HEX	Slfn2			Ileum	25.0383	23.6386	1.39966			M WT	88	-2.21951	-1.42313	2.68167
A05	HEX	Slfn2	F KO	69	Ileum	22.4239	23.4191	-0.995278	-0.97409		M WT	99	-1.07344	-0.277065	1.21173
A06	HEX	Slfn2			Ileum	22.4376	23.3905	-0.952901			M WT	1	0.879614	1.67599	0.312951
A07	HEX	Slfn2	M KO	72	Ileum	22.0241	23.9146	-1.89049	-1.79313		M KO	66	1.2284	2.02477	0.245744	0.796592	0.806579	0.39179
A08	HEX	Slfn2			Ileum	22.1838	23.8795	-1.69577			M KO	72	-1.79313	-0.996753	1.9955
A09	HEX	Slfn2	M WT	75	Ileum	20.6203	22.889	-2.26861	-2.02475		M KO	91	0.221874	1.01825	0.493715
A10	HEX	Slfn2			Ileum	20.5773	22.3582	-1.78089			M KO	98	0.351126	1.1475	0.451406
A11	HEX	Slfn2	F KO	76	Ileum	24.6266	23.308	1.31859	1.33715
A12	HEX	Slfn2			Ileum	24.9403	23.5845	1.35572				Female	Ave. dCt	-0.000464086
E01	HEX	Slfn2	F KO	94	Ileum	22.9722	23.6998	-0.727599	-0.885967			Slfn2	dCt	ddCt	Fold Change	Ave. Fold	Std dev	Ttest
E02	HEX	Slfn2			Ileum	22.8549	23.8993	-1.04433			F WT	62	-1.89998	-1.89951	3.73087	1.72721	1.59659
E03	HEX	Slfn2	F WT	79	Ileum	23.9493	23.6274	0.321853	0.349776		F WT	79	0.349776	0.35024	0.784454
E04	HEX	Slfn2			Ileum	23.8956	23.5179	0.377698			F WT	77	2.71298	2.71345	0.152465
E05	HEX	Slfn2	F KO	80	Ileum	24.2639	23.0051	1.25874	1.12053		F WT	6	-1.16464	-1.16418	2.24105
E06	HEX	Slfn2			Ileum	24.0273	23.0449	0.982325			F KO	69	-0.97409	-0.973626	1.96377	1.08336	0.675907	0.39681
E07	HEX	Slfn2	M WT	86	Ileum	23.309	22.6042	0.704867	0.456207		F KO	76	1.33715	1.33762	0.395674
E08	HEX	Slfn2			Ileum	23.1975	22.9899	0.207546			F KO	94	-0.885967	-0.885503	1.84741
E09	HEX	Slfn2	M WT	88	Ileum	21.7586	24.0036	-2.24501	-2.21951		F KO	80	1.12053	1.121	0.459776
E10	HEX	Slfn2			Ileum	21.8527	24.0467	-2.19401			F KO	95	0.22862	0.229084	0.853176
E11	HEX	Slfn2	M KO	91	Ileum	24.5157	24.2168	0.298875	0.221874		F KO	96	0.0281267	0.0285908	0.980377
E12	HEX	Slfn2			Ileum	24.5649	24.42	0.144873
A01	HEX	Slfn2	F WT	77	Ileum	25.411	22.6895	2.72151	2.71298
A02	HEX	Slfn2			Ileum	25.4978	22.7933	2.70446
A03	HEX	Slfn2	F KO	95	Ileum	23.222	22.9286	0.293416	0.22862
A04	HEX	Slfn2			Ileum	23.1484	22.9846	0.163825
A05	HEX	Slfn2	F KO	96	Ileum	23.3969	23.2846	0.112265	0.0281267
A06	HEX	Slfn2			Ileum	23.2566	23.3126	-0.0560112
A11	HEX	Slfn2	M WT	99	Ileum	23.0082	23.9429	-0.934644	-1.07344
A12	HEX	Slfn2			Ileum	22.8741	24.0863	-1.21224
E01	HEX	Slfn2	M KO	98	Ileum	22.836	22.4905	0.345543	0.351126
E02	HEX	Slfn2			Ileum	22.6833	22.3266	0.356708
E03	HEX	Slfn2	M WT	1	Ileum	23.5174	22.5185	0.998871	0.879614
E04	HEX	Slfn2			Ileum	23.3873	22.6269	0.760356
E05	HEX	Slfn2	F WT	6	Ileum	21.4473	22.5859	-1.13855	-1.16464
E06	HEX	Slfn2			Ileum	21.453	22.6437	-1.19073
C01	FAM	Slfn3	F WT	62	Ileum	29.6877	23.9368	5.75089	5.71821			Male	Ave. dCt	5.56939
C02	FAM	Slfn3			Ileum	29.6725	23.987	5.68553				Slfn3	dCt	ddCt	Fold Change	Ave. Fold	Std dev	Ttest
C03	FAM	Slfn3	M KO	66	Ileum	35.8525	23.777	12.0755	12.36		M WT	75	5.11852	-0.450865	1.36686	1.14984	0.729669
C04	FAM	Slfn3			Ileum	36.403	23.7583	12.6446			M WT	86	6.24699	0.677607	0.625201
C05	FAM	Slfn3	F KO	69	Ileum	44.0723	23.5414	20.5309	18.9613		M WT	88	4.34358	-1.22581	2.33886
C06	FAM	Slfn3			Ileum	40.8604	23.4688	17.3916			M WT	99	6.17196	0.602571	0.658579
C07	FAM	Slfn3	M KO	72	Ileum	36.8033	23.6999	13.1034	13.3253		M WT	1	5.96588	0.396495	0.759702
C08	FAM	Slfn3			Ileum	37.6368	24.0895	13.5473			M KO	66	12.36	6.79066	0.00903248	0.0034849	0.00426027	0.0173675
C09	FAM	Slfn3	M WT	75	Ileum	27.9011	22.7634	5.13768	5.11852		M KO	72	13.3253	7.75596	0.00462619
C10	FAM	Slfn3			Ileum	27.5485	22.4491	5.09937			M KO	91	18.6125	13.0431	0.000118474
C11	FAM	Slfn3	F KO	76	Ileum	42.5618	23.5633	18.9984	18.863		M KO	98	18.157	12.5876	0.00016246
C12	FAM	Slfn3			Ileum	42.2365	23.5089	18.7276
G01	FAM	Slfn3	F KO	94	Ileum	39.2731	23.9308	15.3423	16.2999			Female	Ave. dCt	5.16178
G02	FAM	Slfn3			Ileum	41.0015	23.7441	17.2574				Slfn3	dCt	ddCt	Fold Change	Ave. Fold	Std dev	Ttest
G03	FAM	Slfn3	F WT	79	Ileum	29.7673	23.5121	6.25524	6.30801		F WT	62	5.71821	0.556433	0.679981	1.19682	0.77235
G04	FAM	Slfn3			Ileum	29.8489	23.4881	6.36078			F WT	79	6.30801	1.14624	0.451802
G05	FAM	Slfn3	F KO	80	Ileum	39.0959	23.6334	15.4625	16.1233		F WT	77	4.07746	-1.08432	2.12038
G06	FAM	Slfn3			Ileum	40.2006	23.4165	16.7841			F WT	6	4.54343	-0.61835	1.53512
G07	FAM	Slfn3	M WT	86	Ileum	29.2297	23.0316	6.19809	6.24699		F KO	69	18.9613	13.7995	7.01357e-05	0.00024778	0.000203773	0.00442242
G08	FAM	Slfn3			Ileum	29.3528	23.0569	6.2959			F KO	76	18.863	13.7013	7.50772e-05
G09	FAM	Slfn3	M WT	88	Ileum	28.3671	24.0053	4.36175	4.34358		F KO	94	16.2999	11.1381	0.00044371
G10	FAM	Slfn3			Ileum	28.4423	24.1169	4.32541			F KO	80	16.1233	10.9615	0.000501471
G11	FAM	Slfn3	M KO	91	Ileum	42.8486	24.6065	18.2421	18.6125		F KO	95	19.2036	14.0418	5.92928e-05
G12	FAM	Slfn3			Ileum	43.5958	24.6129	18.9829			F KO	96	16.6968	11.535	0.000336993
C01	FAM	Slfn3	F WT	77	Ileum	26.9607	22.9991	3.96159	4.07746
C02	FAM	Slfn3			Ileum	27.0022	22.8089	4.19332
C03	FAM	Slfn3	F KO	95	Ileum	42.0632	22.9613	19.1019	19.2036
C04	FAM	Slfn3			Ileum	42.328	23.0227	19.3053
C05	FAM	Slfn3	F KO	96	Ileum	42.1324	23.248	18.8843	16.6968
C06	FAM	Slfn3			Ileum	37.8068	23.2976	14.5092
C11	FAM	Slfn3	M WT	99	Ileum	30.1226	23.8436	6.27907	6.17196
C12	FAM	Slfn3			Ileum	30.2173	24.1524	6.06484
G01	FAM	Slfn3	M KO	98	Ileum	39.8743	22.9073	16.9669	18.157
G02	FAM	Slfn3			Ileum	41.9129	22.5658	19.3471
G03	FAM	Slfn3	M WT	1	Ileum	28.7864	22.7582	6.02814	5.96588
G04	FAM	Slfn3			Ileum	28.7023	22.7986	5.90363
G05	FAM	Slfn3	F WT	6	Ileum	27.5483	22.9722	4.57614	4.54343
G06	FAM	Slfn3			Ileum	27.5575	23.0468	4.51071
D01	Cy5	Slfn4	F WT	62	Ileum	23.3438	22.63	0.713834	0.790646			Male	Ave. dCt	0.39444
D02	Cy5	Slfn4			Ileum	23.3176	22.4502	0.867457				Slfn4	dCt	ddCt	Fold Change	Ave. Fold	Std dev	Ttest
D03	Cy5	Slfn4	M KO	66	Ileum	24.2198	22.3895	1.83032	1.79144		M WT	75	0.453175	0.0587345	0.960106	1.1468	0.646595
D04	Cy5	Slfn4			Ileum	24.1347	22.3822	1.75256			M WT	86	0.696818	0.302378	0.810915
D05	Cy5	Slfn4	F KO	69	Ileum	23.7514	22.2356	1.51576	1.5696		M WT	88	-0.683124	-1.07756	2.11047
D06	Cy5	Slfn4			Ileum	23.8063	22.1828	1.62343			M WT	99	-0.117154	-0.511594	1.42562
D07	Cy5	Slfn4	M KO	72	Ileum	22.9547	22.5518	0.402886	0.464689		M WT	1	1.62249	1.22805	0.426895
D08	Cy5	Slfn4			Ileum	23.1479	22.6214	0.526491			M KO	66	1.79144	1.397	0.379718	0.749122	0.268943	0.29136
D09	Cy5	Slfn4	M WT	75	Ileum	21.7017	21.2397	0.46204	0.453175		M KO	72	0.464689	0.0702485	0.952474
D10	Cy5	Slfn4			Ileum	21.8664	21.4221	0.444309			M KO	91	0.869432	0.474992	0.719471
D11	Cy5	Slfn4	F KO	76	Ileum	25.2854	22.2297	3.05567	3.04108		M KO	98	0.476319	0.0818784	0.944827
D12	Cy5	Slfn4			Ileum	25.2577	22.2312	3.02649
H01	Cy5	Slfn4	F KO	94	Ileum	22.8689	22.5918	0.277147	0.218907			Female	Ave. dCt	1.47957
H02	Cy5	Slfn4			Ileum	22.8415	22.6808	0.160667				Slfn4	dCt	ddCt	Fold Change	Ave. Fold	Std dev	Ttest
H03	Cy5	Slfn4	F WT	79	Ileum	25.6793	22.3257	3.35364	3.33114		F WT	62	0.790646	-0.688928	1.61209	1.596	1.65457
H04	Cy5	Slfn4			Ileum	25.8064	22.4978	3.30865			F WT	79	3.33114	1.85157	0.277091
H05	Cy5	Slfn4	F KO	80	Ileum	25.233	22.6114	2.62162	2.70268		F WT	77	2.28939	0.809818	0.570454
H06	Cy5	Slfn4			Ileum	25.1343	22.3506	2.78373			F WT	6	-0.492885	-1.97246	3.92436
H07	Cy5	Slfn4	M WT	86	Ileum	22.6108	21.7466	0.86429	0.696818		F KO	69	1.5696	0.0900223	0.939508	1.16283	0.771777	0.58602
H08	Cy5	Slfn4			Ileum	22.5085	21.9791	0.529347			F KO	76	3.04108	1.5615	0.338798
H09	Cy5	Slfn4	M WT	88	Ileum	22.1523	22.8736	-0.721271	-0.683124		F KO	94	0.218907	-1.26067	2.39607
H10	Cy5	Slfn4			Ileum	22.1638	22.8088	-0.644977			F KO	80	2.70268	1.2231	0.42836
H11	Cy5	Slfn4	M KO	91	Ileum	24.0585	23.1684	0.89016	0.869432		F KO	95	1.10289	-0.376684	1.29835
H12	Cy5	Slfn4			Ileum	24.1811	23.3324	0.848705			F KO	96	0.823415	-0.656159	1.57588
D01	Cy5	Slfn4	F WT	77	Ileum	25.1671	22.9662	2.2009	2.28939
D02	Cy5	Slfn4			Ileum	25.104	22.7261	2.37789
D03	Cy5	Slfn4	F KO	95	Ileum	24.1653	23.0057	1.15966	1.10289
D04	Cy5	Slfn4			Ileum	24.0978	23.0517	1.04612
D05	Cy5	Slfn4	F KO	96	Ileum	24.1921	23.3357	0.856362	0.823415
D06	Cy5	Slfn4			Ileum	24.1648	23.3743	0.790468
D11	Cy5	Slfn4	M WT	99	Ileum	24.0241	24.0666	-0.0425393	-0.117154
D12	Cy5	Slfn4			Ileum	23.9693	24.1611	-0.191769
H01	Cy5	Slfn4	M KO	98	Ileum	23.2151	22.8318	0.383338	0.476319
H02	Cy5	Slfn4			Ileum	23.1583	22.589	0.569299
H03	Cy5	Slfn4	M WT	1	Ileum	24.6527	23.0621	1.59056	1.62249
H04	Cy5	Slfn4			Ileum	24.6111	22.9567	1.65442
H05	Cy5	Slfn4	F WT	6	Ileum	22.731	23.1638	-0.432804	-0.492885
H06	Cy5	Slfn4			Ileum	22.6008	23.1538	-0.552966
A01	Cy5	Slfn5	F WT	62	Ileum	24.7388	23.7505	0.988326	0.95811			Male	Ave. dCt	3.28078
A02	Cy5	Slfn5			Ileum	24.68	23.7521	0.927894				Slfn5	dCt	ddCt	Fold Change	Ave. Fold	Std dev	Ttest
A03	Cy5	Slfn5	M KO	66	Ileum	28.1147	24.0019	4.11282	4.23867		M WT	75	1.88471	-1.39607	2.63184	1.43771	1.12753
A04	Cy5	Slfn5			Ileum	28.0032	23.6386	4.36452			M WT	86	4.02423	0.743445	0.597311
A05	Cy5	Slfn5	F KO	69	Ileum	25.2897	23.4191	1.87056	1.87053		M WT	88	1.89847	-1.38231	2.60686
A06	Cy5	Slfn5			Ileum	25.261	23.3905	1.87049			M WT	99	3.09407	-0.186709	1.13816
A07	Cy5	Slfn5	M KO	72	Ileum	25.3937	23.9146	1.47907	1.51363		M WT	1	5.50243	2.22165	0.214397
A08	Cy5	Slfn5			Ileum	25.4277	23.8795	1.54818			M KO	66	4.23867	0.95789	0.514809	1.48078	1.36112	0.959936
A09	Cy5	Slfn5	M WT	75	Ileum	24.5103	22.889	1.62139	1.88471		M KO	72	1.51363	-1.76715	3.40382
A10	Cy5	Slfn5			Ileum	24.5063	22.3582	2.14804			M KO	91	2.70899	-0.571794	1.48637
A11	Cy5	Slfn5	F KO	76	Ileum	27.1806	23.308	3.87265	3.75335		M KO	98	4.22947	0.948687	0.518104
A12	Cy5	Slfn5			Ileum	27.2186	23.5845	3.63406
E01	Cy5	Slfn5	F KO	94	Ileum	25.5541	23.6998	1.85433	1.67794			Female	Ave. dCt	3.76477
E02	Cy5	Slfn5			Ileum	25.4008	23.8993	1.50156				Slfn5	dCt	ddCt	Fold Change	Ave. Fold	Std dev	Ttest
E03	Cy5	Slfn5	F WT	79	Ileum	28.4343	23.6274	4.80692	4.84744		F WT	62	0.95811	-2.80666	6.99661	2.43972	3.16258
E04	Cy5	Slfn5			Ileum	28.4058	23.5179	4.88795			F WT	79	4.84744	1.08267	0.472154
E05	Cy5	Slfn5	F KO	80	Ileum	27.4605	23.0051	4.45539	4.40826		F WT	77	6.59259	2.82782	0.140845
E06	Cy5	Slfn5			Ileum	27.4061	23.0449	4.36114			F WT	6	2.66093	-1.10384	2.14926
E07	Cy5	Slfn5	M WT	86	Ileum	26.7743	22.6042	4.1701	4.02423		F KO	69	1.87053	-1.89424	3.71726	1.83937	1.675	0.702158
E08	Cy5	Slfn5			Ileum	26.8683	22.9899	3.87835			F KO	76	3.75335	-0.0114138	1.00794
E09	Cy5	Slfn5	M WT	88	Ileum	25.9201	24.0036	1.9165	1.89847		F KO	94	1.67794	-2.08682	4.24811
E10	Cy5	Slfn5			Ileum	25.9272	24.0467	1.88044			F KO	80	4.40826	0.643496	0.64016
E11	Cy5	Slfn5	M KO	91	Ileum	26.9475	24.2168	2.73065	2.70899		F KO	95	4.50533	0.740559	0.598508
E12	Cy5	Slfn5			Ileum	27.1073	24.42	2.68733			F KO	96	4.04361	0.278843	0.824252
A01	Cy5	Slfn5	F WT	77	Ileum	29.2725	22.6895	6.58295	6.59259
A02	Cy5	Slfn5			Ileum	29.3956	22.7933	6.60223
A03	Cy5	Slfn5	F KO	95	Ileum	27.4506	22.9286	4.52206	4.50533
A04	Cy5	Slfn5			Ileum	27.4732	22.9846	4.48859
A05	Cy5	Slfn5	F KO	96	Ileum	27.3708	23.2846	4.08615	4.04361
A06	Cy5	Slfn5			Ileum	27.3137	23.3126	4.00107
A11	Cy5	Slfn5	M WT	99	Ileum	27.1282	23.9429	3.18538	3.09407
A12	Cy5	Slfn5			Ileum	27.0891	24.0863	3.00277
E01	Cy5	Slfn5	M KO	98	Ileum	26.7433	22.4905	4.25276	4.22947
E02	Cy5	Slfn5			Ileum	26.5328	22.3266	4.20618
E03	Cy5	Slfn5	M WT	1	Ileum	28.0364	22.5185	5.51789	5.50243
E04	Cy5	Slfn5			Ileum	28.1139	22.6269	5.48697
E05	Cy5	Slfn5	F WT	6	Ileum	25.2914	22.5859	2.70555	2.66093
E06	Cy5	Slfn5			Ileum	25.26	22.6437	2.61631
A01	FAM	Slfn8	F WT	62	Ileum	23.1838	23.7505	-0.566708	-0.542388			Male	Ave. dCt	0.0411567
A02	FAM	Slfn8			Ileum	23.234	23.7521	-0.518068				Slfn8	dCt	ddCt	Fold Change	Ave. Fold	Std dev	Ttest
A03	FAM	Slfn8	M KO	66	Ileum	24.866	24.0019	0.864105	1.03931		M WT	75	-0.597992	-0.639149	1.55741	1.055	0.372392
A04	FAM	Slfn8			Ileum	24.8532	23.6386	1.21451			M WT	86	-0.280544	-0.3217	1.2498
A05	FAM	Slfn8	F KO	69	Ileum	24.0068	23.4191	0.587707	0.39693		M WT	88	-0.0162947	-0.0574514	1.04063
A06	FAM	Slfn8			Ileum	23.5967	23.3905	0.206154			M WT	99	0.804596	0.76344	0.58909
A07	FAM	Slfn8	M KO	72	Ileum	24.6722	23.9146	0.757529	0.737997		M WT	1	0.296017	0.254861	0.838068
A08	FAM	Slfn8			Ileum	24.598	23.8795	0.718465			M KO	66	1.03931	0.998153	0.500641	0.507583	0.0784232	0.0246234
A09	FAM	Slfn8	M WT	75	Ileum	22.0795	22.889	-0.809455	-0.597992		M KO	72	0.737997	0.69684	0.616922
A10	FAM	Slfn8			Ileum	21.9717	22.3582	-0.38653			M KO	91	1.09726	1.05611	0.480928
A11	FAM	Slfn8	F KO	76	Ileum	24.5127	23.308	1.20472	1.15282		M KO	98	1.25259	1.21143	0.431841
A12	FAM	Slfn8			Ileum	24.6855	23.5845	1.10091
E01	FAM	Slfn8	F KO	94	Ileum	23.9468	23.6998	0.246982	0.112509			Female	Ave. dCt	0.0977266
E02	FAM	Slfn8			Ileum	23.8773	23.8993	-0.0219641				Slfn8	dCt	ddCt	Fold Change	Ave. Fold	Std dev	Ttest
E03	FAM	Slfn8	F WT	79	Ileum	23.0407	23.6274	-0.586725	-0.51541		F WT	62	-0.542388	-0.640114	1.55845	1.09618	0.517798
E04	FAM	Slfn8			Ileum	23.0738	23.5179	-0.444095			F WT	79	-0.51541	-0.613137	1.52958
E05	FAM	Slfn8	F KO	80	Ileum	24.1644	23.0051	1.15927	1.06346		F WT	77	0.789248	0.691522	0.6192
E06	FAM	Slfn8			Ileum	24.0126	23.0449	0.967644			F WT	6	0.659456	0.561729	0.67749
E07	FAM	Slfn8	M WT	86	Ileum	22.4073	22.6042	-0.196871	-0.280544		F KO	69	0.39693	0.299204	0.812701	0.588479	0.255508	0.0697949
E08	FAM	Slfn8			Ileum	22.6257	22.9899	-0.364216			F KO	76	1.15282	1.05509	0.481267
E09	FAM	Slfn8	M WT	88	Ileum	23.9766	24.0036	-0.0269634	-0.0162947		F KO	94	0.112509	0.0147825	0.989806
E10	FAM	Slfn8			Ileum	24.0411	24.0467	-0.00562611			F KO	80	1.06346	0.965729	0.51202
E11	FAM	Slfn8	M KO	91	Ileum	25.422	24.2168	1.20522	1.09726		F KO	95	1.572	1.47428	0.359914
E12	FAM	Slfn8			Ileum	25.4093	24.42	0.989312			F KO	96	1.51211	1.41439	0.375169
A01	FAM	Slfn8	F WT	77	Ileum	23.5412	22.6895	0.851647	0.789248
A02	FAM	Slfn8			Ileum	23.5202	22.7933	0.72685
A03	FAM	Slfn8	F KO	95	Ileum	24.5207	22.9286	1.59209	1.572
A04	FAM	Slfn8			Ileum	24.5365	22.9846	1.55192
A05	FAM	Slfn8	F KO	96	Ileum	24.8104	23.2846	1.52581	1.51211
A06	FAM	Slfn8			Ileum	24.811	23.3126	1.49842
A11	FAM	Slfn8	M WT	99	Ileum	24.8829	23.9429	0.940032	0.804596
A12	FAM	Slfn8			Ileum	24.7555	24.0863	0.669161
E01	FAM	Slfn8	M KO	98	Ileum	23.8479	22.4905	1.35737	1.25259
E02	FAM	Slfn8			Ileum	23.4744	22.3266	1.1478
E03	FAM	Slfn8	M WT	1	Ileum	22.8607	22.5185	0.342229	0.296017
E04	FAM	Slfn8			Ileum	22.8767	22.6269	0.249805
E05	FAM	Slfn8	F WT	6	Ileum	23.2294	22.5859	0.643541	0.659456
E06	FAM	Slfn8			Ileum	23.3191	22.6437	0.675371
B01	Cy5	Slfn9	F WT	62	Ileum	24.0162	23.7505	0.265656	0.319237			Male	Ave. dCt	1.17157
B02	Cy5	Slfn9			Ileum	24.1249	23.7521	0.372817				Slfn9	dCt	ddCt	Fold Change	Ave. Fold	Std dev	Ttest
B03	Cy5	Slfn9	M KO	66	Ileum	25.4125	24.0019	1.41061	1.64573		M WT	75	0.245044	-0.926527	1.9007	1.10971	0.555949
B04	Cy5	Slfn9			Ileum	25.5195	23.6386	1.88084			M WT	86	0.675751	-0.49582	1.41012
B05	Cy5	Slfn9	F KO	69	Ileum	24.5312	23.4191	1.11202	1.16544		M WT	88	1.13943	-0.0321409	1.02253
B06	Cy5	Slfn9			Ileum	24.6094	23.3905	1.21886			M WT	99	2.05481	0.883241	0.542148
B07	Cy5	Slfn9	M KO	72	Ileum	25.2682	23.9146	1.35355	1.39151		M WT	1	1.74282	0.571247	0.673035
B08	Cy5	Slfn9			Ileum	25.309	23.8795	1.42948			M KO	66	1.64573	0.474157	0.719887	0.610193	0.224021	0.138263
B09	Cy5	Slfn9	M WT	75	Ileum	22.8374	22.889	-0.0515493	0.245044		M KO	72	1.39151	0.219943	0.8586
B10	Cy5	Slfn9			Ileum	22.8999	22.3582	0.541637			M KO	91	2.14067	0.969096	0.510826
B11	Cy5	Slfn9	F KO	76	Ileum	25.3687	23.308	2.0607	1.91747		M KO	98	2.68014	1.50857	0.351459
B12	Cy5	Slfn9			Ileum	25.3588	23.5845	1.77425
F01	Cy5	Slfn9	F KO	94	Ileum	25.2951	23.6998	1.59529	1.41282			Female	Ave. dCt	1.16872
F02	Cy5	Slfn9			Ileum	25.1296	23.8993	1.23035				Slfn9	dCt	ddCt	Fold Change	Ave. Fold	Std dev	Ttest
F03	Cy5	Slfn9	F WT	79	Ileum	24.1192	23.6274	0.491795	0.508747		F WT	62	0.319237	-0.849481	1.80185	1.1424	0.640587
F04	Cy5	Slfn9			Ileum	24.0436	23.5179	0.525699			F WT	79	0.508747	-0.65997	1.58005
F05	Cy5	Slfn9	F KO	80	Ileum	25.0395	23.0051	2.03437	2.03548		F WT	77	1.83225	0.663534	0.63133
F06	Cy5	Slfn9			Ileum	25.0815	23.0449	2.03659			F WT	6	2.01463	0.845917	0.556357
F07	Cy5	Slfn9	M WT	86	Ileum	23.4492	22.6042	0.84501	0.675751		F KO	69	1.16544	-0.00327512	1.00227	0.627099	0.250088	0.106698
F08	Cy5	Slfn9			Ileum	23.4964	22.9899	0.506492			F KO	76	1.91747	0.748756	0.595117
F09	Cy5	Slfn9	M WT	88	Ileum	25.1421	24.0036	1.13856	1.13943		F KO	94	1.41282	0.244104	0.84434
F10	Cy5	Slfn9			Ileum	25.187	24.0467	1.1403			F KO	80	2.03548	0.866759	0.548377
F11	Cy5	Slfn9	M KO	91	Ileum	26.3659	24.2168	2.14908	2.14067		F KO	95	2.44143	1.27271	0.413882
F12	Cy5	Slfn9			Ileum	26.5523	24.42	2.13225			F KO	96	2.64825	1.47953	0.358605
B01	Cy5	Slfn9	F WT	77	Ileum	24.6185	22.6895	1.92894	1.83225
B02	Cy5	Slfn9			Ileum	24.5289	22.7933	1.73556
B03	Cy5	Slfn9	F KO	95	Ileum	25.3212	22.9286	2.3926	2.44143
B04	Cy5	Slfn9			Ileum	25.4748	22.9846	2.49025
B05	Cy5	Slfn9	F KO	96	Ileum	25.8675	23.2846	2.58287	2.64825
B06	Cy5	Slfn9			Ileum	26.0263	23.3126	2.71364
B11	Cy5	Slfn9	M WT	99	Ileum	26.0462	23.9429	2.10338	2.05481
B12	Cy5	Slfn9			Ileum	26.0926	24.0863	2.00625
F01	Cy5	Slfn9	M KO	98	Ileum	25.1686	22.4905	2.67813	2.68014
F02	Cy5	Slfn9			Ileum	25.0087	22.3266	2.68216
F03	Cy5	Slfn9	M WT	1	Ileum	24.2831	22.5185	1.76455	1.74282
F04	Cy5	Slfn9			Ileum	24.348	22.6269	1.72108
F05	Cy5	Slfn9	F WT	6	Ileum	24.6795	22.5859	2.09365	2.01463
F06	Cy5	Slfn9			Ileum	24.5793	22.6437	1.93562
B01	HEX	RPLP0			Ileum	23.7505
B02	HEX	RPLP0			Ileum	23.7521
B03	HEX	RPLP0			Ileum	24.0019
B04	HEX	RPLP0			Ileum	23.6386
B05	HEX	RPLP0			Ileum	23.4191
B06	HEX	RPLP0			Ileum	23.3905
B07	HEX	RPLP0			Ileum	23.9146
B08	HEX	RPLP0			Ileum	23.8795
B09	HEX	RPLP0			Ileum	22.889
B10	HEX	RPLP0			Ileum	22.3582
B11	HEX	RPLP0			Ileum	23.308
B12	HEX	RPLP0			Ileum	23.5845
C01	HEX	RPLP0			Ileum	23.9368
C02	HEX	RPLP0			Ileum	23.987
C03	HEX	RPLP0			Ileum	23.777
C04	HEX	RPLP0			Ileum	23.7583
C05	HEX	RPLP0			Ileum	23.5414
C06	HEX	RPLP0			Ileum	23.4688
C07	HEX	RPLP0			Ileum	23.6999
C08	HEX	RPLP0			Ileum	24.0895
C09	HEX	RPLP0			Ileum	22.7634
C10	HEX	RPLP0			Ileum	22.4491
C11	HEX	RPLP0			Ileum	23.5633
C12	HEX	RPLP0			Ileum	23.5089
D01	HEX	RPLP0			Ileum	22.63
D02	HEX	RPLP0			Ileum	22.4502
D03	HEX	RPLP0			Ileum	22.3895
D04	HEX	RPLP0			Ileum	22.3822
D05	HEX	RPLP0			Ileum	22.2356
D06	HEX	RPLP0			Ileum	22.1828
D07	HEX	RPLP0			Ileum	22.5518
D08	HEX	RPLP0			Ileum	22.6214
D09	HEX	RPLP0			Ileum	21.2397
D10	HEX	RPLP0			Ileum	21.4221
D11	HEX	RPLP0			Ileum	22.2297
D12	HEX	RPLP0			Ileum	22.2312
F01	HEX	RPLP0			Ileum	23.6998
F02	HEX	RPLP0			Ileum	23.8993
F03	HEX	RPLP0			Ileum	23.6274
F04	HEX	RPLP0			Ileum	23.5179
F05	HEX	RPLP0			Ileum	23.0051
F06	HEX	RPLP0			Ileum	23.0449
F07	HEX	RPLP0			Ileum	22.6042
F08	HEX	RPLP0			Ileum	22.9899
F09	HEX	RPLP0			Ileum	24.0036
F10	HEX	RPLP0			Ileum	24.0467
F11	HEX	RPLP0			Ileum	24.2168
F12	HEX	RPLP0			Ileum	24.42
G01	HEX	RPLP0			Ileum	23.9308
G02	HEX	RPLP0			Ileum	23.7441
G03	HEX	RPLP0			Ileum	23.5121
G04	HEX	RPLP0			Ileum	23.4881
G05	HEX	RPLP0			Ileum	23.6334
G06	HEX	RPLP0			Ileum	23.4165
G07	HEX	RPLP0			Ileum	23.0316
G08	HEX	RPLP0			Ileum	23.0569
G09	HEX	RPLP0			Ileum	24.0053
G10	HEX	RPLP0			Ileum	24.1169
G11	HEX	RPLP0			Ileum	24.6065
G12	HEX	RPLP0			Ileum	24.6129
H01	HEX	RPLP0			Ileum	22.5918
H02	HEX	RPLP0			Ileum	22.6808
H03	HEX	RPLP0			Ileum	22.3257
H04	HEX	RPLP0			Ileum	22.4978
H05	HEX	RPLP0			Ileum	22.6114
H06	HEX	RPLP0			Ileum	22.3506
H07	HEX	RPLP0			Ileum	21.7466
H08	HEX	RPLP0			Ileum	21.9791
H09	HEX	RPLP0			Ileum	22.8736
H10	HEX	RPLP0			Ileum	22.8088
H11	HEX	RPLP0			Ileum	23.1684
H12	HEX	RPLP0			Ileum	23.3324
