# Supplementary material for: Loss of Schlafen3 influences the expression levels of Schlafen family members in ileum, thymus, and spleen tissue
Source: PeerJ. 2020 Jan 28;8:e8461. doi: 10.7717/peerj.8461 (PMC6993753; doi:10.7717/peerj.8461)
Supplement: Supplemental Information 7 [file peerj-08-8461-s007.xlsx]

## Sheet: 20190312_TSI SLFN FAM P1
File Name	20190312_TSI SLFN FAM P1.pcrd
Created By User
Notes
ID
Run Started	03/12/2019 16:27:20 UTC
Run Ended	03/12/2019 17:40:32 UTC
Sample Vol	20
Lid Temp	105
Protocol File Name	Unknown.prcl
Plate Setup File Name	DefaultPlate.pltd
Base Serial Number	CT031118
Optical Head Serial Number	785BR9482
CFX Manager Version	3.1.1517.0823.
Well group	All Wells
Amplification step	3
Melt step
Well	Fluor	Target	Sex Genotype	Content	Sample	Cq	Starting Quantity (SQ)	dCt	Ave. dCt			Male	Ave. dCt	3.10777
B01	FAM	Slfn1	F WT	95	Thymus	25.1127	21.7854	3.3273	3.25733			Slfn1	dCt	ddCt	Fold Change	Ave. Fold	Std dev	Ttest
B02	FAM	Slfn1			Thymus	25.1102	21.9228	3.18735			M WT	99	3.27415	0.166377	0.891078	1.14494	0.61053
B03	FAM	Slfn1	F KO	96	Thymus	26.2567	21.7211	4.53562	4.52088		M WT	7	3.14841	0.0406413	0.972223
B04	FAM	Slfn1			Thymus	26.2828	21.7767	4.50614			M WT	9	3.29846	0.190693	0.876185
B05	FAM	Slfn1	F WT	97	Thymus	26.1778	21.237	4.94083	4.94562		M WT	17	1.90488	-1.20289	2.302
B06	FAM	Slfn1			Thymus	26.2227	21.2723	4.9504			M WT	20	2.65457	-0.453202	1.36908
B07	FAM	Slfn1	M KO	98	Thymus	26.4983	21.91	4.58821	4.6012		M WT	32	2.82444	-0.283331	1.217
B08	FAM	Slfn1			Thymus	26.6379	22.0237	4.61418			M WT	42	4.1244	1.01664	0.494268
B09	FAM	Slfn1	M WT	99	Thymus	24.7421	21.5115	3.23063	3.27415		M WT	49	2.26327	-0.844499	1.79564
B10	FAM	Slfn1			Thymus	24.7485	21.4308	3.31766			M WT	53	4.47734	1.36957	0.387006
B11	FAM	Slfn1	F KO	3	Thymus	26.2823	21.8015	4.48085	4.44099		M KO	98	4.6012	1.49343	0.355167	1.41057	0.636358	0.45674
B12	FAM	Slfn1			Thymus	26.4726	22.0715	4.40113			M KO	18	2.40872	-0.699046	1.62343
F01	FAM	Slfn1	F KO	4	Thymus	24.2643	21.6227	2.6416	2.69062		M KO	23	2.61549	-0.492276	1.40666
F02	FAM	Slfn1			Thymus	24.1835	21.4439	2.73964			M KO	24	2.42288	-0.684887	1.60758
F03	FAM	Slfn1	M WT	7	Thymus	24.348	21.1839	3.16409	3.14841		M KO	46	2.0651	-1.04266	2.06003
F04	FAM	Slfn1			Thymus	24.3321	21.1994	3.13273
F07	FAM	Slfn1	M WT	9	Thymus	24.0704	20.7999	3.27046	3.29846			Female	Ave. dCt	3.39425
F08	FAM	Slfn1			Thymus	24.1469	20.8204	3.32647				Slfn1	dCt	ddCt	Fold Change	Ave. Fold	Std dev	Ttest
F09	FAM	Slfn1	F WT	11	Thymus	25.0302	21.8252	3.20499	3.19349		F WT	95	3.25733	-0.136927	1.09956	1.13979	0.579239
F10	FAM	Slfn1			Thymus	24.9163	21.7343	3.182			F WT	97	4.94562	1.55137	0.341187
F11	FAM	Slfn1	F KO	14	Thymus	26.5868	21.8218	4.76506	4.68538		F WT	11	3.19349	-0.200758	1.1493
F12	FAM	Slfn1			Thymus	26.5083	21.9026	4.6057			F WT	16	4.09225	0.697998	0.616427
B01	FAM	Slfn1	F WT	16	Thymus	26.5487	22.431	4.11774	4.09225		F WT	21	3.4638	0.069545	0.952938
B02	FAM	Slfn1			Thymus	26.4506	22.3838	4.06676			F WT	26	3.3707	-0.0235541	1.01646
B03	FAM	Slfn1	M WT	17	Thymus	23.6024	21.6468	1.95568	1.90488		F WT	27	2.44189	-0.952358	1.93503
B04	FAM	Slfn1			Thymus	23.6187	21.7646	1.85409			F WT	45	2.38894	-1.00531	2.00738
B05	FAM	Slfn1	M KO	18	Thymus	24.5836	22.1829	2.40074	2.40872		F KO	96	4.52088	1.12663	0.457985	1.16023	0.681793	0.949377
B06	FAM	Slfn1			Thymus	24.5969	22.1802	2.41671			F KO	3	4.44099	1.04673	0.484063
B07	FAM	Slfn1	M WT	20	Thymus	24.1323	21.3884	2.74392	2.65457		F KO	4	2.69062	-0.703632	1.6286
B08	FAM	Slfn1			Thymus	24.1861	21.6209	2.56521			F KO	14	4.68538	1.29113	0.408632
B09	FAM	Slfn1	F WT	21	Thymus	26.1725	22.5725	3.60005	3.4638		F KO	28	2.15549	-1.23877	2.35997
B10	FAM	Slfn1			Thymus	26.1192	22.7917	3.32754			F KO	38	2.9497	-0.444555	1.36089
B11	FAM	Slfn1	M KO	23	Thymus	24.1216	21.468	2.65356	2.61549		F KO	43	3.08583	-0.308424	1.23835
B12	FAM	Slfn1			Thymus	24.2182	21.6408	2.57743			F KO	59	2.96842	-0.425833	1.34335
F01	FAM	Slfn1	M KO	24	Thymus	24.7305	22.3766	2.35387	2.42288
F02	FAM	Slfn1			Thymus	24.5558	22.0639	2.4919
F03	FAM	Slfn1	F WT	26	Thymus	25.1602	21.7417	3.41857	3.3707
F04	FAM	Slfn1			Thymus	25.1917	21.8688	3.32283
F05	FAM	Slfn1	F WT	27	Thymus	23.8084	21.3401	2.4683	2.44189
F06	FAM	Slfn1			Thymus	23.7632	21.3477	2.41549
F07	FAM	Slfn1	F KO	28	Thymus	24.2941	22.1377	2.15645	2.15549
F08	FAM	Slfn1			Thymus	24.2885	22.134	2.15452
F09	FAM	Slfn1	M WT	32	Thymus	24.2771	21.4356	2.84158	2.82444
F10	FAM	Slfn1			Thymus	24.206	21.3987	2.80729
F11	FAM	Slfn1	F KO	38	Thymus	24.7845	21.918	2.86646	2.9497
F12	FAM	Slfn1			Thymus	24.9207	21.8878	3.03293
B01	FAM	Slfn1	M WT	42	Thymus	26.0473	22.1025	3.94484	4.1244
B02	FAM	Slfn1			Thymus	26.0665	21.7625	4.30397
B03	FAM	Slfn1	F KO	43	Thymus	24.5803	21.5439	3.03643	3.08583
B04	FAM	Slfn1			Thymus	24.576	21.4408	3.13523
B05	FAM	Slfn1	F WT	45	Thymus	24.759	22.4039	2.35509	2.38894
B06	FAM	Slfn1			Thymus	24.7424	22.3197	2.4228
F01	FAM	Slfn1	M KO	46	Thymus	23.928	21.7602	2.16781	2.0651
F02	FAM	Slfn1			Thymus	23.6952	21.7328	1.9624
F03	FAM	Slfn1	M WT	49	Thymus	23.745	21.5101	2.23493	2.26327
F04	FAM	Slfn1			Thymus	23.7913	21.4997	2.29161
B09	FAM	Slfn1	M WT	53	Thymus	26.1255	21.648	4.47752	4.47734
B10	FAM	Slfn1			Thymus	26.0553	21.5781	4.47717
F05	FAM	Slfn1	F KO	59	Thymus	24.2559	21.349	2.90688	2.96842
F06	FAM	Slfn1			Thymus	24.3047	21.2748	3.02996
A01	HEX	Slfn2	F WT	95	Thymus	20.5198	21.7854	-1.26566	-1.34432			Male	Ave. dCt	-1.38332
A02	HEX	Slfn2			Thymus	20.4998	21.9228	-1.42298				Slfn2	dCt	ddCt	Fold Change	Ave. Fold	Std dev	Ttest
A03	HEX	Slfn2	F KO	96	Thymus	20.7527	21.7211	-0.968415	-0.996022		M WT	99	-1.23672	0.146593	0.903381	1.01026	0.158296
A04	HEX	Slfn2			Thymus	20.7531	21.7767	-1.02363			M WT	7	-1.39449	-0.0111706	1.00777
A05	HEX	Slfn2	F WT	97	Thymus	20.6305	21.237	-0.606479	-0.677019		M WT	9	-1.22565	0.157667	0.896474
A06	HEX	Slfn2			Thymus	20.5247	21.2723	-0.747559			M WT	17	-1.80034	-0.417027	1.33517
A07	HEX	Slfn2	M KO	98	Thymus	21.2415	21.91	-0.668547	-0.737687		M WT	20	-1.39487	-0.0115581	1.00804
A08	HEX	Slfn2			Thymus	21.2169	22.0237	-0.806826			M WT	32	-1.36964	0.0136743	0.990566
A09	HEX	Slfn2	M WT	99	Thymus	20.2129	21.5115	-1.2986	-1.23672		M WT	42	-1.32696	0.0563561	0.96169
A10	HEX	Slfn2			Thymus	20.256	21.4308	-1.17485			M WT	49	-1.61969	-0.236375	1.17803
A11	HEX	Slfn2	F KO	3	Thymus	20.9547	21.8015	-0.846757	-0.947635		M WT	53	-1.08148	0.30184	0.811217
A12	HEX	Slfn2			Thymus	21.023	22.0715	-1.04851			M KO	98	-0.737687	0.645629	0.639214	1.155	0.308815	0.261485
E01	HEX	Slfn2	F KO	4	Thymus	19.7814	21.6227	-1.84123	-1.8813		M KO	18	-1.89212	-0.508807	1.42287
E02	HEX	Slfn2			Thymus	19.5225	21.4439	-1.92137			M KO	23	-1.58594	-0.202627	1.15079
E03	HEX	Slfn2	M WT	7	Thymus	19.8121	21.1839	-1.37179	-1.39449		M KO	24	-1.82492	-0.441607	1.35812
E04	HEX	Slfn2			Thymus	19.7822	21.1994	-1.41718			M KO	46	-1.65116	-0.267844	1.20401
E07	HEX	Slfn2	M WT	9	Thymus	19.5875	20.7999	-1.21243	-1.22565
E08	HEX	Slfn2			Thymus	19.5815	20.8204	-1.23887				Female	Ave. dCt	-1.15169
E09	HEX	Slfn2	F WT	11	Thymus	20.6199	21.8252	-1.20528	-1.1513			Slfn2	dCt	ddCt	Fold Change	Ave. Fold	Std dev	Ttest
E10	HEX	Slfn2			Thymus	20.6369	21.7343	-1.09732			F WT	95	-1.34432	-0.192633	1.14285	1.01212	0.160495
E11	HEX	Slfn2	F KO	14	Thymus	21.0608	21.8218	-0.760999	-0.778282		F WT	97	-0.677019	0.474668	0.719632
E12	HEX	Slfn2			Thymus	21.107	21.9026	-0.795566			F WT	11	-1.1513	0.000388558	0.999731
A01	HEX	Slfn2	F WT	16	Thymus	21.3362	22.431	-1.09474	-1.056		F WT	16	-1.056	0.0956839	0.935829
A02	HEX	Slfn2			Thymus	21.3666	22.3838	-1.01727			F WT	21	-0.964279	0.187409	0.878182
A03	HEX	Slfn2	M WT	17	Thymus	19.8449	21.6468	-1.80192	-1.80034		F WT	26	-1.27414	-0.122454	1.08858
A04	HEX	Slfn2			Thymus	19.9658	21.7646	-1.79877			F WT	27	-1.39288	-0.241195	1.18197
A05	HEX	Slfn2	M KO	18	Thymus	20.3689	22.1829	-1.81396	-1.89212		F WT	45	-1.35356	-0.201868	1.15019
A06	HEX	Slfn2			Thymus	20.2099	22.1802	-1.97029			F KO	96	-0.996022	0.155665	0.897718	1.01292	0.303208	0.994844
A07	HEX	Slfn2	M WT	20	Thymus	20.1205	21.3884	-1.26783	-1.39487		F KO	3	-0.947635	0.204053	0.868109
A08	HEX	Slfn2			Thymus	20.0989	21.6209	-1.52191			F KO	4	-1.8813	-0.729613	1.65819
A09	HEX	Slfn2	F WT	21	Thymus	21.7289	22.5725	-0.843573	-0.964279		F KO	14	-0.778282	0.373405	0.771958
A10	HEX	Slfn2			Thymus	21.7067	22.7917	-1.08498			F KO	28	-1.41177	-0.260083	1.19755
A11	HEX	Slfn2	M KO	23	Thymus	19.9704	21.468	-1.49767	-1.58594		F KO	38	-1.30316	-0.151475	1.1107
A12	HEX	Slfn2			Thymus	19.9666	21.6408	-1.67421			F KO	43	-0.812464	0.339223	0.790467
E01	HEX	Slfn2	M KO	24	Thymus	20.5253	22.3766	-1.85127	-1.82492		F KO	59	-0.845269	0.306418	0.808647
E02	HEX	Slfn2			Thymus	20.2653	22.0639	-1.79857
E03	HEX	Slfn2	F WT	26	Thymus	20.4863	21.7417	-1.25537	-1.27414
E04	HEX	Slfn2			Thymus	20.5759	21.8688	-1.29292
E05	HEX	Slfn2	F WT	27	Thymus	20.0053	21.3401	-1.33481	-1.39288
E06	HEX	Slfn2			Thymus	19.8968	21.3477	-1.45095
E07	HEX	Slfn2	F KO	28	Thymus	20.7054	22.1377	-1.43233	-1.41177
E08	HEX	Slfn2			Thymus	20.7428	22.134	-1.39121
E09	HEX	Slfn2	M WT	32	Thymus	20.0683	21.4356	-1.36723	-1.36964
E10	HEX	Slfn2			Thymus	20.0266	21.3987	-1.37206
E11	HEX	Slfn2	F KO	38	Thymus	20.5801	21.918	-1.33786	-1.30316
E12	HEX	Slfn2			Thymus	20.6193	21.8878	-1.26847
A01	HEX	Slfn2	M WT	42	Thymus	20.5971	22.1025	-1.50535	-1.32696
A02	HEX	Slfn2			Thymus	20.614	21.7625	-1.14857
A03	HEX	Slfn2	F KO	43	Thymus	20.625	21.5439	-0.918868	-0.812464
A04	HEX	Slfn2			Thymus	20.7347	21.4408	-0.706061
A05	HEX	Slfn2	F WT	45	Thymus	21.0263	22.4039	-1.37764	-1.35356
A06	HEX	Slfn2			Thymus	20.9902	22.3197	-1.32947
E01	HEX	Slfn2	M KO	46	Thymus	20.105	21.7602	-1.6552	-1.65116
E02	HEX	Slfn2			Thymus	20.0857	21.7328	-1.64712
E03	HEX	Slfn2	M WT	49	Thymus	19.7762	21.5101	-1.73394	-1.61969
E04	HEX	Slfn2			Thymus	19.9943	21.4997	-1.50544
A09	HEX	Slfn2	M WT	53	Thymus	20.5769	21.648	-1.07111	-1.08148
A10	HEX	Slfn2			Thymus	20.4863	21.5781	-1.09184
E05	HEX	Slfn2	F KO	59	Thymus	20.3612	21.349	-0.987878	-0.845269
E06	HEX	Slfn2			Thymus	20.5721	21.2748	-0.702661
C01	FAM	Slfn3	F WT	95	Thymus	24.6181	22.3693	2.24881	2.3589			Male	Ave. dCt	1.95128
C02	FAM	Slfn3			Thymus	24.395	21.926	2.46899				Slfn3	dCt	ddCt	Fold Change	Ave. Fold	Std dev	Ttest
C03	FAM	Slfn3	F KO	96	Thymus	41.022	21.8262	19.1958	19.776		M WT	99	2.93062	0.979344	0.50721	1.09744	0.43962
C04	FAM	Slfn3			Thymus	42.3558	21.9996	20.3563			M WT	7	1.92584	-0.0254377	1.01779
C05	FAM	Slfn3	F WT	97	Thymus	23.4155	21.3952	2.0203	1.99873		M WT	9	3.18348	1.2322	0.425668
C06	FAM	Slfn3			Thymus	23.2431	21.2659	1.97717			M WT	17	1.44825	-0.503027	1.41718
C07	FAM	Slfn3	M KO	98	Thymus	44.9105	21.9735	22.937	21.1123		M WT	20	1.31159	-0.639691	1.558
C08	FAM	Slfn3			Thymus	41.3888	22.1012	19.2876			M WT	32	1.27579	-0.675491	1.59714
C09	FAM	Slfn3	M WT	99	Thymus	24.7119	21.7758	2.93606	2.93062		M WT	42	1.54504	-0.406233	1.32522
C10	FAM	Slfn3			Thymus	24.4767	21.5515	2.92518			M WT	49	2.31077	0.359498	0.779436
C11	FAM	Slfn3	F KO	3	Thymus	44.2627	22.0063	22.2564	21.5531		M WT	53	1.63012	-0.321161	1.24934
C12	FAM	Slfn3			Thymus	42.8643	22.0146	20.8498			M KO	98	21.1123	19.161	1.70589e-06	1.88012e-06	1.81928e-06	0.000140387
G01	FAM	Slfn3	F KO	4	Thymus	42.2951	21.7632	20.5319	20.0112		M KO	18	23.1758	21.2245	4.08115e-07
G02	FAM	Slfn3			Thymus	41.157	21.6666	19.4904			M KO	23	21.4607	19.5094	1.33995e-06
G03	FAM	Slfn3	M WT	7	Thymus	23.2014	21.306	1.89537	1.92584		M KO	24	21.9894	20.0381	9.28812e-07
G04	FAM	Slfn3			Thymus	23.3079	21.3516	1.9563			M KO	46	19.5558	17.6045	5.01782e-06
G07	FAM	Slfn3	M WT	9	Thymus	24.0107	20.7972	3.21348	3.18348
G08	FAM	Slfn3			Thymus	24.1733	21.0198	3.15347				Female	Ave. dCt	1.86956
G09	FAM	Slfn3	F WT	11	Thymus	24.2445	22.0209	2.22367	2.19593			Slfn3	dCt	ddCt	Fold Change	Ave. Fold	Std dev	Ttest
G10	FAM	Slfn3			Thymus	24.351	22.1829	2.16818			F WT	95	2.3589	0.489338	0.712352	1.02799	0.260061
G11	FAM	Slfn3	F KO	14	Thymus	47.047	22.1729	24.8741	22.9019		F WT	97	1.99873	0.12917	0.914357
G12	FAM	Slfn3			Thymus	43.2303	22.3005	20.9298			F WT	11	2.19593	0.326362	0.797545
C01	FAM	Slfn3	F WT	16	Thymus	24.5082	22.5943	1.91389	1.90811		F WT	16	1.90811	0.0385467	0.973635
C02	FAM	Slfn3			Thymus	24.2973	22.395	1.90234			F WT	21	2.08897	0.21941	0.858917
C03	FAM	Slfn3	M WT	17	Thymus	23.2093	21.6932	1.51616	1.44825		F WT	26	1.52546	-0.344101	1.26936
C04	FAM	Slfn3			Thymus	23.3645	21.9841	1.38034			F WT	27	1.5233	-0.346261	1.27126
C05	FAM	Slfn3	M KO	18	Thymus	40.8695	22.4077	18.4618	23.1758		F WT	45	1.3571	-0.512464	1.42648
C06	FAM	Slfn3			Thymus	50	22.1102	27.8898			F KO	96	19.776	17.9065	4.07022e-06	2.09587e-06	1.67755e-06	2.30649e-08
C07	FAM	Slfn3	M WT	20	Thymus	23.1116	21.7532	1.35841	1.31159		F KO	3	21.5531	19.6835	1.18759e-06
C08	FAM	Slfn3			Thymus	23.1489	21.8842	1.26476			F KO	4	20.0112	18.1416	3.45809e-06
C09	FAM	Slfn3	F WT	21	Thymus	25.1423	23.0546	2.08773	2.08897		F KO	14	22.9019	21.0324	4.6626e-07
C10	FAM	Slfn3			Thymus	24.8975	22.8073	2.09021			F KO	28	19.6168	17.7472	4.54524e-06
C11	FAM	Slfn3	M KO	23	Thymus	41.6001	21.6337	19.9663	21.4607		F KO	38	23.7925	21.9229	2.51504e-07
C12	FAM	Slfn3			Thymus	44.8504	21.8954	22.955			F KO	43	21.5434	19.6738	1.19562e-06
G01	FAM	Slfn3	M KO	24	Thymus	47.5913	22.5499	25.0414	21.9894		F KO	59	21.1299	19.2603	1.59245e-06
G02	FAM	Slfn3			Thymus	41.3262	22.3889	18.9374
G03	FAM	Slfn3	F WT	26	Thymus	23.5771	22.0774	1.49966	1.52546
G04	FAM	Slfn3			Thymus	23.6759	22.1247	1.55126
G05	FAM	Slfn3	F WT	27	Thymus	23.0875	21.5468	1.54076	1.5233
G06	FAM	Slfn3			Thymus	23.1668	21.661	1.50585
G07	FAM	Slfn3	F KO	28	Thymus	42.3075	22.5293	19.7782	19.6168
G08	FAM	Slfn3			Thymus	42.215	22.7596	19.4554
G09	FAM	Slfn3	M WT	32	Thymus	22.94	21.7505	1.18942	1.27579
G10	FAM	Slfn3			Thymus	23.0345	21.6723	1.36216
G11	FAM	Slfn3	F KO	38	Thymus	42.0872	22.0232	20.064	23.7925
G12	FAM	Slfn3			Thymus	50	22.479	27.521
C01	FAM	Slfn3	M WT	42	Thymus	23.3667	21.7747	1.592	1.54504
C02	FAM	Slfn3			Thymus	23.236	21.7379	1.49809
C03	FAM	Slfn3	F KO	43	Thymus	42.0589	21.6116	20.4473	21.5434
C04	FAM	Slfn3			Thymus	44.2535	21.614	22.6395
C05	FAM	Slfn3	F WT	45	Thymus	23.8645	22.4812	1.38326	1.3571
C06	FAM	Slfn3			Thymus	23.631	22.3	1.33095
G01	FAM	Slfn3	M KO	46	Thymus	40.8341	21.8576	18.9765	19.5558
G02	FAM	Slfn3			Thymus	41.9802	21.8451	20.1351
G03	FAM	Slfn3	M WT	49	Thymus	24.1689	21.8184	2.35051	2.31077
G04	FAM	Slfn3			Thymus	24.2446	21.9736	2.27104
C09	FAM	Slfn3	M WT	53	Thymus	23.4028	21.8256	1.57724	1.63012
C10	FAM	Slfn3			Thymus	23.2307	21.5477	1.68299
G05	FAM	Slfn3	F KO	59	Thymus	43.0482	21.8596	21.1886	21.1299
G06	FAM	Slfn3			Thymus	42.6827	21.6115	21.0712
D01	Cy5	Slfn4	F WT	95	Thymus	29.2795	22.0441	7.23547	7.17275			Male	Ave. dCt	7.89855
D02	Cy5	Slfn4			Thymus	29.1894	22.0794	7.11003				Slfn4	dCt	ddCt	Fold Change	Ave. Fold	Std dev	Ttest
D03	Cy5	Slfn4	F KO	96	Thymus	30.9384	21.806	9.13248	9.16661		M WT	99	8.30557	0.407028	0.754176	1.19573	0.738971
D04	Cy5	Slfn4			Thymus	30.9852	21.7845	9.20074			M WT	7	9.60862	1.71008	0.305644
D05	Cy5	Slfn4	F WT	97	Thymus	29.3956	21.4557	7.93992	7.89367		M WT	9	8.78446	0.885908	0.541147
D06	Cy5	Slfn4			Thymus	29.318	21.4705	7.84743			M WT	17	7.5058	-0.39275	1.31289
D07	Cy5	Slfn4	M KO	98	Thymus	30.1309	22.0901	8.04084	8.04284		M WT	20	7.66009	-0.238455	1.17973
D08	Cy5	Slfn4			Thymus	30.1486	22.1038	8.04484			M WT	32	6.44975	-1.44879	2.72979
D09	Cy5	Slfn4	M WT	99	Thymus	29.9753	21.6966	8.27868	8.30557		M WT	42	8.26485	0.366303	0.775768
D10	Cy5	Slfn4			Thymus	30.009	21.6765	8.33247			M WT	49	7.03628	-0.86227	1.8179
D11	Cy5	Slfn4	F KO	3	Thymus	31.7246	22.0667	9.65794	9.43575		M WT	53	7.4715	-0.42705	1.34448
D12	Cy5	Slfn4			Thymus	31.332	22.1184	9.21356			M KO	98	8.04284	0.144292	0.904823	2.19049	1.12985	0.0678067
H01	Cy5	Slfn4	F KO	4	Thymus	29.5722	21.8229	7.74926	7.7666		M KO	18	6.09286	-1.80568	3.49595
H02	Cy5	Slfn4			Thymus	29.4308	21.6468	7.78394			M KO	23	6.19269	-1.70585	3.26222
H03	Cy5	Slfn4	M WT	7	Thymus	31.2033	21.6019	9.6014	9.60862		M KO	24	7.13839	-0.760154	1.69367
H04	Cy5	Slfn4			Thymus	31.1545	21.5386	9.61585			M KO	46	7.22428	-0.674265	1.59578
H07	Cy5	Slfn4	M WT	9	Thymus	29.7332	21.1275	8.60575	8.78446
H08	Cy5	Slfn4			Thymus	30.0906	21.1275	8.96316				Female	Ave. dCt	6.72131
H09	Cy5	Slfn4	F WT	11	Thymus	29.7428	22.3216	7.42124	7.53743			Slfn4	dCt	ddCt	Fold Change	Ave. Fold	Std dev	Ttest
H10	Cy5	Slfn4			Thymus	29.8776	22.224	7.65362			F WT	95	7.17275	0.451441	0.731312	1.17397	0.713096
H11	Cy5	Slfn4	F KO	14	Thymus	31.6598	22.0651	9.59467	9.57109		F WT	97	7.89367	1.17236	0.443694
H12	Cy5	Slfn4			Thymus	31.9601	22.4126	9.54752			F WT	11	7.53743	0.816116	0.567969
D01	Cy5	Slfn4	F WT	16	Thymus	28.9675	22.847	6.12052	6.10588		F WT	16	6.10588	-0.615431	1.53202
D02	Cy5	Slfn4			Thymus	28.6686	22.5774	6.09124			F WT	21	5.62046	-1.10085	2.14482
D03	Cy5	Slfn4	M WT	17	Thymus	29.4188	21.9426	7.47614	7.5058		F WT	26	6.96049	0.239184	0.847224
D04	Cy5	Slfn4			Thymus	29.2541	21.7186	7.53545			F WT	27	6.9372	0.215892	0.861013
D05	Cy5	Slfn4	M KO	18	Thymus	28.329	22.229	6.09999	6.09286		F WT	45	5.5426	-1.17871	2.26375
D06	Cy5	Slfn4			Thymus	28.3358	22.25	6.08574			F KO	96	9.16661	2.4453	0.183608	0.646992	0.494824	0.107958
D07	Cy5	Slfn4	M WT	20	Thymus	29.3099	21.7151	7.59482	7.66009		F KO	3	9.43575	2.71444	0.15236
D08	Cy5	Slfn4			Thymus	29.483	21.7577	7.72536			F KO	4	7.7666	1.04529	0.484547
D09	Cy5	Slfn4	F WT	21	Thymus	28.5094	22.8481	5.66123	5.62046		F KO	14	9.57109	2.84978	0.138717
D10	Cy5	Slfn4			Thymus	28.5657	22.986	5.57969			F KO	28	6.43333	-0.287985	1.22093
D11	Cy5	Slfn4	M KO	23	Thymus	27.8979	21.6327	6.26521	6.19269		F KO	38	6.34539	-0.375917	1.29766
D12	Cy5	Slfn4			Thymus	27.8069	21.6867	6.12018			F KO	43	7.4853	0.763993	0.588864
H01	Cy5	Slfn4	M KO	24	Thymus	29.6341	22.5463	7.0878	7.13839		F KO	59	6.57174	-0.149575	1.10924
H02	Cy5	Slfn4			Thymus	29.5434	22.3544	7.18898
H03	Cy5	Slfn4	F WT	26	Thymus	29.1949	22.2119	6.98307	6.96049
H04	Cy5	Slfn4			Thymus	29.2453	22.3074	6.93792
H05	Cy5	Slfn4	F WT	27	Thymus	28.9138	21.906	7.00783	6.9372
H06	Cy5	Slfn4			Thymus	28.8023	21.9357	6.86657
H07	Cy5	Slfn4	F KO	28	Thymus	29.3263	22.7757	6.55061	6.43333
H08	Cy5	Slfn4			Thymus	29.2322	22.9162	6.31604
H09	Cy5	Slfn4	M WT	32	Thymus	28.1266	21.7614	6.36519	6.44975
H10	Cy5	Slfn4			Thymus	28.2465	21.7122	6.53431
H11	Cy5	Slfn4	F KO	38	Thymus	28.4365	22.0561	6.38041	6.34539
H12	Cy5	Slfn4			Thymus	28.4516	22.1413	6.31037
D01	Cy5	Slfn4	M WT	42	Thymus	30.4365	22.1078	8.32872	8.26485
D02	Cy5	Slfn4			Thymus	30.3282	22.1272	8.20098
D03	Cy5	Slfn4	F KO	43	Thymus	29.0709	21.7242	7.34669	7.4853
D04	Cy5	Slfn4			Thymus	29.1897	21.5658	7.62392
D05	Cy5	Slfn4	F WT	45	Thymus	28.0702	22.5544	5.51585	5.5426
D06	Cy5	Slfn4			Thymus	28.0426	22.4733	5.56935
H01	Cy5	Slfn4	M KO	46	Thymus	29.4441	22.2564	7.18769	7.22428
H02	Cy5	Slfn4			Thymus	29.3302	22.0693	7.26087
H03	Cy5	Slfn4	M WT	49	Thymus	29.0247	22.0291	6.99562	7.03628
H04	Cy5	Slfn4			Thymus	29.1257	22.0488	7.07694
D09	Cy5	Slfn4	M WT	53	Thymus	29.0187	21.5247	7.494	7.4715
D10	Cy5	Slfn4			Thymus	29.0275	21.5785	7.44899
H05	Cy5	Slfn4	F KO	59	Thymus	28.4361	21.9991	6.43699	6.57174
H06	Cy5	Slfn4			Thymus	28.4643	21.7578	6.70648
A01	Cy5	Slfn5	F WT	95	Thymus	25.1766	21.7854	3.39114	3.35435			Male	Ave. dCt	3.14339
A02	Cy5	Slfn5			Thymus	25.2404	21.9228	3.31757				Slfn5	dCt	ddCt	Fold Change	Ave. Fold	Std dev	Ttest
A03	Cy5	Slfn5	F KO	96	Thymus	25.941	21.7211	4.21989	4.04084		M WT	99	3.49195	0.34856	0.785367	1.09388	0.529897
A04	Cy5	Slfn5			Thymus	25.6385	21.7767	3.86179			M WT	7	3.24985	0.106457	0.928866
A05	Cy5	Slfn5	F WT	97	Thymus	25.4072	21.237	4.17026	4.05976		M WT	9	3.36782	0.224434	0.855931
A06	Cy5	Slfn5			Thymus	25.2215	21.2723	3.94926			M WT	17	1.97523	-1.16816	2.24725
A07	Cy5	Slfn5	M KO	98	Thymus	26.1925	21.91	4.28248	4.38085		M WT	20	2.47157	-0.671826	1.59309
A08	Cy5	Slfn5			Thymus	26.503	22.0237	4.47922			M WT	32	2.8639	-0.279494	1.21377
A09	Cy5	Slfn5	M WT	99	Thymus	24.8222	21.5115	3.31069	3.49195		M WT	42	3.55101	0.407616	0.753868
A10	Cy5	Slfn5			Thymus	25.104	21.4308	3.67321			M WT	49	3.21025	0.0668546	0.954717
A11	Cy5	Slfn5	F KO	3	Thymus	25.8511	21.8015	4.04963	4.03883		M WT	53	4.10895	0.965557	0.512081
A12	Cy5	Slfn5			Thymus	26.0995	22.0715	4.02803			M KO	98	4.38085	1.23746	0.424119	1.60391	0.808549	0.176375
E01	Cy5	Slfn5	F KO	4	Thymus	24.3699	21.6227	2.74723	2.71449		M KO	18	2.05252	-1.09087	2.13002
E02	Cy5	Slfn5			Thymus	24.1256	21.4439	2.68175			M KO	23	1.91005	-1.23334	2.35111
E03	Cy5	Slfn5	M WT	7	Thymus	24.4168	21.1839	3.23292	3.24985		M KO	24	2.14692	-0.996467	1.99511
E04	Cy5	Slfn5			Thymus	24.4662	21.1994	3.26677			M KO	46	2.98094	-0.162453	1.11919
E07	Cy5	Slfn5	M WT	9	Thymus	24.1875	20.7999	3.38758	3.36782
E08	Cy5	Slfn5			Thymus	24.1685	20.8204	3.34807				Female	Ave. dCt	3.29342
E09	Cy5	Slfn5	F WT	11	Thymus	25.823	21.8252	3.99783	4.08018			Slfn5	dCt	ddCt	Fold Change	Ave. Fold	Std dev	Ttest
E10	Cy5	Slfn5			Thymus	25.8968	21.7343	4.16253			F WT	95	3.35435	0.0609326	0.958644	1.06642	0.406328
E11	Cy5	Slfn5	F KO	14	Thymus	26.1552	21.8218	4.33341	4.28157		F WT	97	4.05976	0.766339	0.587908
E12	Cy5	Slfn5			Thymus	26.1323	21.9026	4.22972			F WT	11	4.08018	0.78676	0.579645
A01	Cy5	Slfn5	F WT	16	Thymus	25.5002	22.431	3.06923	3.15601		F WT	16	3.15601	-0.137415	1.09993
A02	Cy5	Slfn5			Thymus	25.6266	22.3838	3.24278			F WT	21	3.29941	0.00599006	0.995857
A03	Cy5	Slfn5	M WT	17	Thymus	23.6276	21.6468	1.98087	1.97523		F WT	26	3.00277	-0.290653	1.22319
A04	Cy5	Slfn5			Thymus	23.7342	21.7646	1.9696			F WT	27	2.40295	-0.890473	1.85378
A05	Cy5	Slfn5	M KO	18	Thymus	24.239	22.1829	2.05611	2.05252		F WT	45	2.99194	-0.301479	1.23241
A06	Cy5	Slfn5			Thymus	24.2291	22.1802	2.04893			F KO	96	4.04084	0.747418	0.595669	0.909605	0.496311	0.500559
A07	Cy5	Slfn5	M WT	20	Thymus	23.9054	21.3884	2.51703	2.47157		F KO	3	4.03883	0.745407	0.596499
A08	Cy5	Slfn5			Thymus	24.047	21.6209	2.4261			F KO	4	2.71449	-0.57893	1.49374
A09	Cy5	Slfn5	F WT	21	Thymus	25.9698	22.5725	3.39732	3.29941		F KO	14	4.28157	0.988145	0.504126
A10	Cy5	Slfn5			Thymus	25.9932	22.7917	3.2015			F KO	28	2.4437	-0.849722	1.80215
A11	Cy5	Slfn5	M KO	23	Thymus	23.3804	21.468	1.91232	1.91005		F KO	38	3.17848	-0.11494	1.08293
A12	Cy5	Slfn5			Thymus	23.5485	21.6408	1.90778			F KO	43	3.91614	0.622724	0.649444
E01	Cy5	Slfn5	M KO	24	Thymus	24.4808	22.3766	2.10417	2.14692		F KO	59	4.14997	0.856544	0.552274
E02	Cy5	Slfn5			Thymus	24.2536	22.0639	2.18968
E03	Cy5	Slfn5	F WT	26	Thymus	24.7947	21.7417	3.05306	3.00277
E04	Cy5	Slfn5			Thymus	24.8213	21.8688	2.95248
E05	Cy5	Slfn5	F WT	27	Thymus	23.8502	21.3401	2.51004	2.40295
E06	Cy5	Slfn5			Thymus	23.6436	21.3477	2.29586
E07	Cy5	Slfn5	F KO	28	Thymus	24.5622	22.1377	2.42451	2.4437
E08	Cy5	Slfn5			Thymus	24.5969	22.134	2.46289
E09	Cy5	Slfn5	M WT	32	Thymus	24.2892	21.4356	2.85368	2.8639
E10	Cy5	Slfn5			Thymus	24.2728	21.3987	2.87411
E11	Cy5	Slfn5	F KO	38	Thymus	25.0202	21.918	3.10219	3.17848
E12	Cy5	Slfn5			Thymus	25.1426	21.8878	3.25477
A01	Cy5	Slfn5	M WT	42	Thymus	25.4549	22.1025	3.35242	3.55101
A02	Cy5	Slfn5			Thymus	25.5121	21.7625	3.74959
A03	Cy5	Slfn5	F KO	43	Thymus	25.3378	21.5439	3.79385	3.91614
A04	Cy5	Slfn5			Thymus	25.4792	21.4408	4.03844
A05	Cy5	Slfn5	F WT	45	Thymus	25.3769	22.4039	2.973	2.99194
A06	Cy5	Slfn5			Thymus	25.3305	22.3197	3.01089
E01	Cy5	Slfn5	M KO	46	Thymus	24.8395	21.7602	3.07929	2.98094
E02	Cy5	Slfn5			Thymus	24.6154	21.7328	2.88258
E03	Cy5	Slfn5	M WT	49	Thymus	24.694	21.5101	3.18385	3.21025
E04	Cy5	Slfn5			Thymus	24.7364	21.4997	3.23665
A09	Cy5	Slfn5	M WT	53	Thymus	25.7525	21.648	4.10449	4.10895
A10	Cy5	Slfn5			Thymus	25.6915	21.5781	4.11341
E05	Cy5	Slfn5	F KO	59	Thymus	25.5006	21.349	4.15159	4.14997
E06	Cy5	Slfn5			Thymus	25.4231	21.2748	4.14834
A01	FAM	Slfn8	F WT	95	Thymus	23.264	21.7854	1.4786	1.37882			Male	Ave. dCt	1.21234
A02	FAM	Slfn8			Thymus	23.2018	21.9228	1.27903				Slfn8	dCt	ddCt	Fold Change	Ave. Fold	Std dev	Ttest
A03	FAM	Slfn8	F KO	96	Thymus	22.6934	21.7211	0.972322	0.948926		M WT	99	1.31498	0.102637	0.931329	1.02692	0.27583
A04	FAM	Slfn8			Thymus	22.7022	21.7767	0.925529			M WT	7	1.54513	0.332786	0.794002
A05	FAM	Slfn8	F WT	97	Thymus	23.2383	21.237	2.00137	1.91879		M WT	9	1.16167	-0.0506755	1.03575
A06	FAM	Slfn8			Thymus	23.1085	21.2723	1.83621			M WT	17	1.05279	-0.159553	1.11694
A07	FAM	Slfn8	M KO	98	Thymus	23.0823	21.91	1.17229	1.15363		M WT	20	1.36645	0.154103	0.898691
A08	FAM	Slfn8			Thymus	23.1587	22.0237	1.13497			M WT	32	1.32167	0.109327	0.92702
A09	FAM	Slfn8	M WT	99	Thymus	22.8418	21.5115	1.33028	1.31498		M WT	42	1.10968	-0.102665	1.07376
A10	FAM	Slfn8			Thymus	22.7305	21.4308	1.29969			M WT	49	0.452903	-0.759441	1.69284
A11	FAM	Slfn8	F KO	3	Thymus	22.871	21.8015	1.06951	0.915996		M WT	53	1.58583	0.373481	0.771918
A12	FAM	Slfn8			Thymus	22.834	22.0715	0.762484			M KO	98	1.15363	-0.058716	1.04154	1.96577	0.613418	0.00172864
E01	FAM	Slfn8	F KO	4	Thymus	21.9034	21.6227	0.280762	0.181564		M KO	18	0.288423	-0.923922	1.89727
E02	FAM	Slfn8			Thymus	21.5263	21.4439	0.082365			M KO	23	-0.082395	-1.29474	2.45333
E03	FAM	Slfn8	M WT	7	Thymus	22.6972	21.1839	1.51331	1.54513		M KO	24	-0.162354	-1.3747	2.59314
E04	FAM	Slfn8			Thymus	22.7763	21.1994	1.57695			M KO	46	0.329826	-0.882519	1.84359
E07	FAM	Slfn8	M WT	9	Thymus	22.0142	20.7999	1.21423	1.16167
E08	FAM	Slfn8			Thymus	21.9295	20.8204	1.10911				Female	Ave. dCt	1.01269
E09	FAM	Slfn8	F WT	11	Thymus	22.7548	21.8252	0.929589	1.00098			Slfn8	dCt	ddCt	Fold Change	Ave. Fold	Std dev	Ttest
E10	FAM	Slfn8			Thymus	22.8066	21.7343	1.07236			F WT	95	1.37882	0.36613	0.775861	1.04539	0.316976
E11	FAM	Slfn8	F KO	14	Thymus	22.9113	21.8218	1.08954	1.04774		F WT	97	1.91879	0.906106	0.533623
E12	FAM	Slfn8			Thymus	22.9086	21.9026	1.00594			F WT	11	1.00098	-0.0117093	1.00815
A01	FAM	Slfn8	F WT	16	Thymus	23.3728	22.431	0.941855	0.96362		F WT	16	0.96362	-0.0490663	1.0346
A02	FAM	Slfn8			Thymus	23.3692	22.3838	0.985384			F WT	21	0.899841	-0.112845	1.08136
A03	FAM	Slfn8	M WT	17	Thymus	22.6776	21.6468	1.03084	1.05279		F WT	26	0.998491	-0.0141952	1.00989
A04	FAM	Slfn8			Thymus	22.8393	21.7646	1.07474			F WT	27	0.57235	-0.440336	1.35692
A05	FAM	Slfn8	M KO	18	Thymus	22.5157	22.1829	0.332839	0.288423		F WT	45	0.368601	-0.644085	1.56275
A06	FAM	Slfn8			Thymus	22.4242	22.1802	0.244006			F KO	96	0.948926	-0.0637601	1.04519	1.41414	0.40291	0.0613002
A07	FAM	Slfn8	M WT	20	Thymus	22.8554	21.3884	1.46707	1.36645		F KO	3	0.915996	-0.0966903	1.06932
A08	FAM	Slfn8			Thymus	22.8867	21.6209	1.26582			F KO	4	0.181564	-0.831122	1.77907
A09	FAM	Slfn8	F WT	21	Thymus	23.5739	22.5725	1.00145	0.899841		F KO	14	1.04774	0.0350545	0.975995
A10	FAM	Slfn8			Thymus	23.5899	22.7917	0.798229			F KO	28	0.0174925	-0.995193	1.99335
A11	FAM	Slfn8	M KO	23	Thymus	21.5267	21.468	0.0586862	-0.082395		F KO	38	0.130573	-0.882113	1.84307
A12	FAM	Slfn8			Thymus	21.4173	21.6408	-0.223476			F KO	43	0.546039	-0.466647	1.38189
E01	FAM	Slfn8	M KO	24	Thymus	22.1617	22.3766	-0.214879	-0.162354		F KO	59	0.71961	-0.293075	1.22525
E02	FAM	Slfn8			Thymus	21.9541	22.0639	-0.109829
E03	FAM	Slfn8	F WT	26	Thymus	22.7409	21.7417	0.99925	0.998491
E04	FAM	Slfn8			Thymus	22.8666	21.8688	0.997731
E05	FAM	Slfn8	F WT	27	Thymus	21.9788	21.3401	0.63867	0.57235
E06	FAM	Slfn8			Thymus	21.8538	21.3477	0.506029
E07	FAM	Slfn8	F KO	28	Thymus	22.1646	22.1377	0.026916	0.0174925
E08	FAM	Slfn8			Thymus	22.1421	22.134	0.00806908
E09	FAM	Slfn8	M WT	32	Thymus	22.7296	21.4356	1.29406	1.32167
E10	FAM	Slfn8			Thymus	22.748	21.3987	1.34929
E11	FAM	Slfn8	F KO	38	Thymus	22.0196	21.918	0.101623	0.130573
E12	FAM	Slfn8			Thymus	22.0473	21.8878	0.159523
A01	FAM	Slfn8	M WT	42	Thymus	23.0469	22.1025	0.944381	1.10968
A02	FAM	Slfn8			Thymus	23.0375	21.7625	1.27498
A03	FAM	Slfn8	F KO	43	Thymus	21.9923	21.5439	0.448436	0.546039
A04	FAM	Slfn8			Thymus	22.0844	21.4408	0.643642
A05	FAM	Slfn8	F WT	45	Thymus	22.7784	22.4039	0.374463	0.368601
A06	FAM	Slfn8			Thymus	22.6824	22.3197	0.362739
E01	FAM	Slfn8	M KO	46	Thymus	22.1012	21.7602	0.340994	0.329826
E02	FAM	Slfn8			Thymus	22.0515	21.7328	0.318657
E03	FAM	Slfn8	M WT	49	Thymus	21.8767	21.5101	0.366559	0.452903
E04	FAM	Slfn8			Thymus	22.039	21.4997	0.539247
A09	FAM	Slfn8	M WT	53	Thymus	23.1969	21.648	1.54888	1.58583
A10	FAM	Slfn8			Thymus	23.2009	21.5781	1.62277
E05	FAM	Slfn8	F KO	59	Thymus	22.0188	21.349	0.669772	0.71961
E06	FAM	Slfn8			Thymus	22.0442	21.2748	0.769449
B01	Cy5	Slfn9	F WT	95	Thymus	24.2655	21.7854	2.48011	2.39636			Male	Ave. dCt	1.98974
B02	Cy5	Slfn9			Thymus	24.2354	21.9228	2.31261				Slfn9	dCt	ddCt	Fold Change	Ave. Fold	Std dev	Ttest
B03	Cy5	Slfn9	F KO	96	Thymus	23.4882	21.7211	1.76709	1.77198		M WT	99	2.09612	0.10638	0.928916	1.03011	0.25782
B04	Cy5	Slfn9			Thymus	23.5535	21.7767	1.77687			M WT	7	2.64568	0.655932	0.634665
B05	Cy5	Slfn9	F WT	97	Thymus	23.7353	21.237	2.49829	2.57081		M WT	9	2.11945	0.129703	0.914019
B06	Cy5	Slfn9			Thymus	23.9156	21.2723	2.64334			M WT	17	1.46781	-0.521939	1.43588
B07	Cy5	Slfn9	M KO	98	Thymus	23.7681	21.91	1.85804	1.87424		M WT	20	1.62938	-0.360365	1.28375
B08	Cy5	Slfn9			Thymus	23.9142	22.0237	1.89044			M WT	32	1.73248	-0.257267	1.19521
B09	Cy5	Slfn9	M WT	99	Thymus	23.5481	21.5115	2.03656	2.09612		M WT	42	1.94667	-0.0430715	1.03031
B10	Cy5	Slfn9			Thymus	23.5865	21.4308	2.15569			M WT	49	1.83251	-0.157234	1.11515
B11	Cy5	Slfn9	F KO	3	Thymus	23.5187	21.8015	1.71724	1.88393		M WT	53	2.43761	0.447861	0.733129
B12	Cy5	Slfn9			Thymus	24.1221	22.0715	2.05063			M KO	98	1.87424	-0.115505	1.08335	2.06205	0.809904	0.00359368
F01	Cy5	Slfn9	F KO	4	Thymus	22.92	21.6227	1.29739	1.24293		M KO	18	0.598442	-1.3913	2.62315
F02	Cy5	Slfn9			Thymus	22.6324	21.4439	1.18847			M KO	23	0.556714	-1.43303	2.70013
F03	Cy5	Slfn9	M WT	7	Thymus	23.8485	21.1839	2.66461	2.64568		M KO	24	0.594727	-1.39502	2.62992
F04	Cy5	Slfn9			Thymus	23.8261	21.1994	2.62674			M KO	46	1.6407	-0.349041	1.27371
F07	Cy5	Slfn9	M WT	9	Thymus	22.7805	20.7999	1.98056	2.11945
F08	Cy5	Slfn9			Thymus	23.0787	20.8204	2.25833				Female	Ave. dCt	1.80365
F09	Cy5	Slfn9	F WT	11	Thymus	23.7383	21.8252	1.91307	1.91669			Slfn9	dCt	ddCt	Fold Change	Ave. Fold	Std dev	Ttest
F10	Cy5	Slfn9			Thymus	23.6546	21.7343	1.92031			F WT	95	2.39636	0.592713	0.663095	1.0433	0.303464
F11	Cy5	Slfn9	F KO	14	Thymus	24.0913	21.8218	2.26958	2.21785		F WT	97	2.57081	0.767168	0.58757
F12	Cy5	Slfn9			Thymus	24.0687	21.9026	2.16612			F WT	11	1.91669	0.113044	0.924635
B01	Cy5	Slfn9	F WT	16	Thymus	23.9069	22.431	1.47594	1.44949		F WT	16	1.44949	-0.354161	1.27824
B02	Cy5	Slfn9			Thymus	23.8069	22.3838	1.42303			F WT	21	1.45423	-0.34942	1.27405
B03	Cy5	Slfn9	M WT	17	Thymus	23.1623	21.6468	1.51552	1.46781		F WT	26	1.6968	-0.106852	1.07688
B04	Cy5	Slfn9			Thymus	23.1847	21.7646	1.42009			F WT	27	1.26626	-0.537389	1.45134
B05	Cy5	Slfn9	M KO	18	Thymus	22.7906	22.1829	0.607743	0.598442		F WT	45	1.67854	-0.125103	1.09059
B06	Cy5	Slfn9			Thymus	22.7693	22.1802	0.589141			F KO	96	1.77198	-0.0316695	1.02219	1.2892	0.527817	0.272472
B07	Cy5	Slfn9	M WT	20	Thymus	23.1176	21.3884	1.7292	1.62938		F KO	3	1.88393	0.0802874	0.945869
B08	Cy5	Slfn9			Thymus	23.1504	21.6209	1.52956			F KO	4	1.24293	-0.560717	1.475
B09	Cy5	Slfn9	F WT	21	Thymus	24.2017	22.5725	1.62926	1.45423		F KO	14	2.21785	0.414203	0.750434
B10	Cy5	Slfn9			Thymus	24.0709	22.7917	1.2792			F KO	28	0.635415	-1.16823	2.24736
B11	Cy5	Slfn9	M KO	23	Thymus	21.9197	21.468	0.451649	0.556714		F KO	38	0.901666	-0.901981	1.86863
B12	Cy5	Slfn9			Thymus	22.3025	21.6408	0.661779			F KO	43	1.67218	-0.131471	1.09541
F01	Cy5	Slfn9	M KO	24	Thymus	22.9437	22.3766	0.567102	0.594727		F KO	59	1.94183	0.138178	0.908666
F02	Cy5	Slfn9			Thymus	22.6862	22.0639	0.622353
F03	Cy5	Slfn9	F WT	26	Thymus	23.5201	21.7417	1.77846	1.6968
F04	Cy5	Slfn9			Thymus	23.484	21.8688	1.61513
F05	Cy5	Slfn9	F WT	27	Thymus	22.5907	21.3401	1.25057	1.26626
F06	Cy5	Slfn9			Thymus	22.6297	21.3477	1.28195
F07	Cy5	Slfn9	F KO	28	Thymus	22.718	22.1377	0.580301	0.635415
F08	Cy5	Slfn9			Thymus	22.8245	22.134	0.690529
F09	Cy5	Slfn9	M WT	32	Thymus	23.1542	21.4356	1.71866	1.73248
F10	Cy5	Slfn9			Thymus	23.145	21.3987	1.7463
F11	Cy5	Slfn9	F KO	38	Thymus	22.8523	21.918	0.934281	0.901666
F12	Cy5	Slfn9			Thymus	22.7568	21.8878	0.869052
B01	Cy5	Slfn9	M WT	42	Thymus	23.913	22.1025	1.81049	1.94667
B02	Cy5	Slfn9			Thymus	23.8454	21.7625	2.08285
B03	Cy5	Slfn9	F KO	43	Thymus	23.1237	21.5439	1.57982	1.67218
B04	Cy5	Slfn9			Thymus	23.2053	21.4408	1.76453
B05	Cy5	Slfn9	F WT	45	Thymus	24.0027	22.4039	1.59873	1.67854
B06	Cy5	Slfn9			Thymus	24.078	22.3197	1.75835
F01	Cy5	Slfn9	M KO	46	Thymus	23.4942	21.7602	1.73394	1.6407
F02	Cy5	Slfn9			Thymus	23.2803	21.7328	1.54747
F03	Cy5	Slfn9	M WT	49	Thymus	23.3304	21.5101	1.82029	1.83251
F04	Cy5	Slfn9			Thymus	23.3444	21.4997	1.84473
F05	Cy5	Slfn9	F KO	59	Thymus	23.2346	21.349	1.88559	1.94183
F06	Cy5	Slfn9			Thymus	23.2728	21.2748	1.99806
B09	Cy5	Slfn9	M WT	53	Thymus	24.0783	21.648	2.43033	2.43761
B10	Cy5	Slfn9			Thymus	24.023	21.5781	2.44488
B01	HEX	RPLP0			Thymus	21.7854
B02	HEX	RPLP0			Thymus	21.9228
B03	HEX	RPLP0			Thymus	21.7211
B04	HEX	RPLP0			Thymus	21.7767
B05	HEX	RPLP0			Thymus	21.237
B06	HEX	RPLP0			Thymus	21.2723
B07	HEX	RPLP0			Thymus	21.91
B08	HEX	RPLP0			Thymus	22.0237
B09	HEX	RPLP0			Thymus	21.5115
B10	HEX	RPLP0			Thymus	21.4308
B11	HEX	RPLP0			Thymus	21.8015
B12	HEX	RPLP0			Thymus	22.0715
C01	HEX	RPLP0			Thymus	22.3693
C02	HEX	RPLP0			Thymus	21.926
C03	HEX	RPLP0			Thymus	21.8262
C04	HEX	RPLP0			Thymus	21.9996
C05	HEX	RPLP0			Thymus	21.3952
C06	HEX	RPLP0			Thymus	21.2659
C07	HEX	RPLP0			Thymus	21.9735
C08	HEX	RPLP0			Thymus	22.1012
C09	HEX	RPLP0			Thymus	21.7758
C10	HEX	RPLP0			Thymus	21.5515
C11	HEX	RPLP0			Thymus	22.0063
C12	HEX	RPLP0			Thymus	22.0146
D01	HEX	RPLP0			Thymus	22.0441
D02	HEX	RPLP0			Thymus	22.0794
D03	HEX	RPLP0			Thymus	21.806
D04	HEX	RPLP0			Thymus	21.7845
D05	HEX	RPLP0			Thymus	21.4557
D06	HEX	RPLP0			Thymus	21.4705
D07	HEX	RPLP0			Thymus	22.0901
D08	HEX	RPLP0			Thymus	22.1038
D09	HEX	RPLP0			Thymus	21.6966
D10	HEX	RPLP0			Thymus	21.6765
D11	HEX	RPLP0			Thymus	22.0667
D12	HEX	RPLP0			Thymus	22.1184
F01	HEX	RPLP0			Thymus	21.6227
F02	HEX	RPLP0			Thymus	21.4439
F03	HEX	RPLP0			Thymus	21.1839
F04	HEX	RPLP0			Thymus	21.1994
F05	HEX	RPLP0			Thymus	21.1625
F06	HEX	RPLP0			Thymus	21.0166
F07	HEX	RPLP0			Thymus	20.7999
F08	HEX	RPLP0			Thymus	20.8204
F09	HEX	RPLP0			Thymus	21.8252
F10	HEX	RPLP0			Thymus	21.7343
F11	HEX	RPLP0			Thymus	21.8218
F12	HEX	RPLP0			Thymus	21.9026
G01	HEX	RPLP0			Thymus	21.7632
G02	HEX	RPLP0			Thymus	21.6666
G03	HEX	RPLP0			Thymus	21.306
G04	HEX	RPLP0			Thymus	21.3516
G05	HEX	RPLP0			Thymus	21.4418
G06	HEX	RPLP0			Thymus	21.3732
G07	HEX	RPLP0			Thymus	20.7972
G08	HEX	RPLP0			Thymus	21.0198
G09	HEX	RPLP0			Thymus	22.0209
G10	HEX	RPLP0			Thymus	22.1829
G11	HEX	RPLP0			Thymus	22.1729
G12	HEX	RPLP0			Thymus	22.3005
H01	HEX	RPLP0			Thymus	21.8229
H02	HEX	RPLP0			Thymus	21.6468
H03	HEX	RPLP0			Thymus	21.6019
H04	HEX	RPLP0			Thymus	21.5386
H05	HEX	RPLP0			Thymus	21.5594
H06	HEX	RPLP0			Thymus	21.5508
H07	HEX	RPLP0			Thymus	21.1275
H08	HEX	RPLP0			Thymus	21.1275
H09	HEX	RPLP0			Thymus	22.3216
H10	HEX	RPLP0			Thymus	22.224
H11	HEX	RPLP0			Thymus	22.0651
H12	HEX	RPLP0			Thymus	22.4126
