# Supplementary material for: Loss of Schlafen3 influences the expression levels of Schlafen family members in ileum, thymus, and spleen tissue
Source: PeerJ. 2020 Jan 28;8:e8461. doi: 10.7717/peerj.8461 (PMC6993753; doi:10.7717/peerj.8461)
Supplement: Supplemental Information 9 [file peerj-08-8461-s009.xlsx]

## Sheet: 20190312_TSI SLFN FAM P4
File Name	20190312_TSI SLFN FAM P4.pcrd
Created By User
Notes
ID
Run Started	03/12/2019 20:09:26 UTC
Run Ended	03/12/2019 21:21:07 UTC
Sample Vol	20
Lid Temp	105
Protocol File Name	Unknown.prcl
Plate Setup File Name	DefaultPlate.pltd
Base Serial Number	CT031118
Optical Head Serial Number	785BR9482
CFX Manager Version	3.1.1517.0823.
Well group	All Wells
Amplification step	3
Melt step
Well	Fluor	Target		Content	Sample	Cq	Starting Quantity (SQ)
B01	FAM	Slfn1	F WT	95	Spleen	23.5515	22.0795
B02	FAM	Slfn1			Spleen	23.459	21.9069
B03	FAM	Slfn1	F KO	96	Spleen	24.2927	21.9814
B04	FAM	Slfn1			Spleen	24.3236	21.941
B05	FAM	Slfn1	F WT	97	Spleen	23.3587	22.0778
B06	FAM	Slfn1			Spleen	23.4627	22.0915
B07	FAM	Slfn1	M KO	98	Spleen	24.2919	21.5087
B08	FAM	Slfn1			Spleen	24.3502	21.6661
B09	FAM	Slfn1	M WT	99	Spleen	24.0194	21.9546
B10	FAM	Slfn1			Spleen	24.0857	22.1291
B11	FAM	Slfn1	F KO	3	Spleen	23.5823	21.9752
B12	FAM	Slfn1			Spleen	23.5839	21.9235
F01	FAM	Slfn1	F KO	4	Spleen	24.1715	22.116
F02	FAM	Slfn1			Spleen	24.0611	21.8435
F03	FAM	Slfn1	M WT	7	Spleen	23.7937	22.4394
F04	FAM	Slfn1			Spleen	23.7233	22.4131
F07	FAM	Slfn1	M WT	9	Spleen	23.6381	21.8126
F08	FAM	Slfn1			Spleen	23.6932	21.8432
F09	FAM	Slfn1	F WT	11	Spleen	22.2229	21.7748
F10	FAM	Slfn1			Spleen	22.2509	21.9061
F11	FAM	Slfn1	F KO	14	Spleen	24.6266	23.0132
F12	FAM	Slfn1			Spleen	24.6537	22.989
A01	HEX	Slfn2	F WT	95	Spleen	20.1045	22.0795
A02	HEX	Slfn2			Spleen	20.1303	21.9069
A03	HEX	Slfn2	F KO	96	Spleen	20.4345	21.9814
A04	HEX	Slfn2			Spleen	20.5713	21.941
A05	HEX	Slfn2	F WT	97	Spleen	20.1096	22.0778
A06	HEX	Slfn2			Spleen	19.9844	22.0915
A07	HEX	Slfn2	M KO	98	Spleen	20.7166	21.5087
A08	HEX	Slfn2			Spleen	20.7633	21.6661
A09	HEX	Slfn2	M WT	99	Spleen	20.6934	21.9546
A10	HEX	Slfn2			Spleen	20.5421	22.1291
A11	HEX	Slfn2	F KO	3	Spleen	19.856	21.9752
A12	HEX	Slfn2			Spleen	19.9957	21.9235
E01	HEX	Slfn2	F KO	4	Spleen	20.1294	22.116
E02	HEX	Slfn2			Spleen	19.9854	21.8435
E03	HEX	Slfn2	M WT	7	Spleen	20.2375	22.4394
E04	HEX	Slfn2			Spleen	20.2856	22.4131
E07	HEX	Slfn2	M WT	9	Spleen	19.921	21.8126
E08	HEX	Slfn2			Spleen	20.0154	21.8432
E09	HEX	Slfn2	F WT	11	Spleen	19.0895	21.7748
E10	HEX	Slfn2			Spleen	19.0427	21.9061
E11	HEX	Slfn2	F KO	14	Spleen	21.1109	23.0132
E12	HEX	Slfn2			Spleen	21.093	22.989
C01	FAM	Slfn3	F WT	95	Spleen	25.3666	22.1693
C02	FAM	Slfn3			Spleen	25.4318	21.9665
C03	FAM	Slfn3	F KO	96	Spleen	42.3378	21.8739
C04	FAM	Slfn3			Spleen	41.2893	21.8978
C05	FAM	Slfn3	F WT	97	Spleen	25.9738	22.3295
C06	FAM	Slfn3			Spleen	25.7927	22.022
C07	FAM	Slfn3	M KO	98	Spleen	41.4758	21.531
C08	FAM	Slfn3			Spleen	39.3251	21.6566
C09	FAM	Slfn3	M WT	99	Spleen	28.2202	22.4226
C10	FAM	Slfn3			Spleen	28.0545	22.0923
C11	FAM	Slfn3	F KO	3	Spleen	46.9627	22.194
C12	FAM	Slfn3			Spleen	39.2257	22.1026
G01	FAM	Slfn3	F KO	4	Spleen	43.2701	22.0551
G02	FAM	Slfn3			Spleen	48.869	21.9895
G03	FAM	Slfn3	M WT	7	Spleen	26.618	22.821
G04	FAM	Slfn3			Spleen	26.753	22.9878
G07	FAM	Slfn3	M WT	9	Spleen	26.7588	22.1459
G08	FAM	Slfn3			Spleen	27.0666	22.227
G09	FAM	Slfn3	F WT	11	Spleen	25.2846	21.9357
G10	FAM	Slfn3			Spleen	25.5017	22.1381
G11	FAM	Slfn3	F KO	14	Spleen	50	23.33
G12	FAM	Slfn3			Spleen	46.0287	23.5505
D01	Cy5	Slfn4	F WT	95	Spleen	28.3838	22.0745
D02	Cy5	Slfn4			Spleen	28.3838	21.9956
D03	Cy5	Slfn4	F KO	96	Spleen	28.8406	22.0874
D04	Cy5	Slfn4			Spleen	28.6478	22.07
D05	Cy5	Slfn4	F WT	97	Spleen	28.1591	22.4378
D06	Cy5	Slfn4			Spleen	28.0613	22.1863
D07	Cy5	Slfn4	M KO	98	Spleen	27.5278	21.589
D08	Cy5	Slfn4			Spleen	27.6684	21.6601
D09	Cy5	Slfn4	M WT	99	Spleen	30.0152	22.1801
D10	Cy5	Slfn4			Spleen	30.1131	22.2126
D11	Cy5	Slfn4	F KO	3	Spleen	27.7731	22.0995
D12	Cy5	Slfn4			Spleen	27.7231	22.1854
H01	Cy5	Slfn4	F KO	4	Spleen	28.5437	22.3139
H02	Cy5	Slfn4			Spleen	28.4544	22.1957
H03	Cy5	Slfn4	M WT	7	Spleen	29.3364	22.9157
H04	Cy5	Slfn4			Spleen	29.3613	23.0284
H07	Cy5	Slfn4	M WT	9	Spleen	28.0514	22.2782
H08	Cy5	Slfn4			Spleen	28.0259	22.391
H09	Cy5	Slfn4	F WT	11	Spleen	28.6902	22.3897
H10	Cy5	Slfn4			Spleen	28.7055	22.2775
H11	Cy5	Slfn4	F KO	14	Spleen	30.1556	23.4057
H12	Cy5	Slfn4			Spleen	30.1488	23.5993
A01	Cy5	Slfn5	F WT	95	Spleen	24.5674	22.0795
A02	Cy5	Slfn5			Spleen	24.5663	21.9069
A03	Cy5	Slfn5	F KO	96	Spleen	25.1572	21.9814
A04	Cy5	Slfn5			Spleen	25.1347	21.941
A05	Cy5	Slfn5	F WT	97	Spleen	24.5156	22.0778
A06	Cy5	Slfn5			Spleen	24.3577	22.0915
A07	Cy5	Slfn5	M KO	98	Spleen	25.5966	21.5087
A08	Cy5	Slfn5			Spleen	25.6223	21.6661
A09	Cy5	Slfn5	M WT	99	Spleen	25.9908	21.9546
A10	Cy5	Slfn5			Spleen	25.9364	22.1291
A11	Cy5	Slfn5	F KO	3	Spleen	24.4458	21.9752
A12	Cy5	Slfn5			Spleen	24.4764	21.9235
E01	Cy5	Slfn5	F KO	4	Spleen	25.2641	22.116
E02	Cy5	Slfn5			Spleen	25.0682	21.8435
E03	Cy5	Slfn5	M WT	7	Spleen	24.8657	22.4394
E04	Cy5	Slfn5			Spleen	25.0188	22.4131
E07	Cy5	Slfn5	M WT	9	Spleen	24.6976	21.8126
E08	Cy5	Slfn5			Spleen	24.6698	21.8432
E09	Cy5	Slfn5	F WT	11	Spleen	23.6758	21.7748
E10	Cy5	Slfn5			Spleen	23.6861	21.9061
E11	Cy5	Slfn5	F KO	14	Spleen	25.8258	23.0132
E12	Cy5	Slfn5			Spleen	26.0105	22.989
A01	FAM	Slfn8	F WT	95	Spleen	23.0559	22.0795
A02	FAM	Slfn8			Spleen	22.882	21.9069
A03	FAM	Slfn8	F KO	96	Spleen	22.6159	21.9814
A04	FAM	Slfn8			Spleen	22.5739	21.941
A05	FAM	Slfn8	F WT	97	Spleen	22.9729	22.0778
A06	FAM	Slfn8			Spleen	22.9801	22.0915
A07	FAM	Slfn8	M KO	98	Spleen	22.6342	21.5087
A08	FAM	Slfn8			Spleen	22.7018	21.6661
A09	FAM	Slfn8	M WT	99	Spleen	23.0995	21.9546
A10	FAM	Slfn8			Spleen	23.1087	22.1291
A11	FAM	Slfn8	F KO	3	Spleen	21.8575	21.9752
A12	FAM	Slfn8			Spleen	21.8899	21.9235
E01	FAM	Slfn8	F KO	4	Spleen	22.3659	22.116
E02	FAM	Slfn8			Spleen	22.1817	21.8435
E03	FAM	Slfn8	M WT	7	Spleen	22.5517	22.4394
E04	FAM	Slfn8			Spleen	22.754	22.4131
E07	FAM	Slfn8	M WT	9	Spleen	22.2343	21.8126
E08	FAM	Slfn8			Spleen	22.1268	21.8432
E09	FAM	Slfn8	F WT	11	Spleen	21.4844	21.7748
E10	FAM	Slfn8			Spleen	21.5004	21.9061
E11	FAM	Slfn8	F KO	14	Spleen	23.028	23.0132
E12	FAM	Slfn8			Spleen	23.0517	22.989
B01	Cy5	Slfn9	F WT	95	Spleen	25.1342	22.0795
B02	Cy5	Slfn9			Spleen	25.1039	21.9069
B03	Cy5	Slfn9	F KO	96	Spleen	23.9964	21.9814
B04	Cy5	Slfn9			Spleen	23.8855	21.941
B05	Cy5	Slfn9	F WT	97	Spleen	25.0358	22.0778
B06	Cy5	Slfn9			Spleen	25.0651	22.0915
B07	Cy5	Slfn9	M KO	98	Spleen	24.0525	21.5087
B08	Cy5	Slfn9			Spleen	24.0868	21.6661
B09	Cy5	Slfn9	M WT	99	Spleen	24.532	21.9546
B10	Cy5	Slfn9			Spleen	24.4512	22.1291
B11	Cy5	Slfn9	F KO	3	Spleen	23.2524	21.9752
B12	Cy5	Slfn9			Spleen	23.2611	21.9235
F01	Cy5	Slfn9	F KO	4	Spleen	23.933	22.116
F02	Cy5	Slfn9			Spleen	23.8618	21.8435
F03	Cy5	Slfn9	M WT	7	Spleen	25.2083	22.4394
F04	Cy5	Slfn9			Spleen	25.2691	22.4131
F07	Cy5	Slfn9	M WT	9	Spleen	23.9856	21.8126
F08	Cy5	Slfn9			Spleen	24.0809	21.8432
F09	Cy5	Slfn9	F WT	11	Spleen	23.3909	21.7748
F10	Cy5	Slfn9			Spleen	23.4338	21.9061
F11	Cy5	Slfn9	F KO	14	Spleen	24.5287	23.0132
F12	Cy5	Slfn9			Spleen	24.4967	22.989
B01	HEX	RPLP0			Spleen	22.0795
B02	HEX	RPLP0			Spleen	21.9069
B03	HEX	RPLP0			Spleen	21.9814
B04	HEX	RPLP0			Spleen	21.941
B05	HEX	RPLP0			Spleen	22.0778
B06	HEX	RPLP0			Spleen	22.0915
B07	HEX	RPLP0			Spleen	21.5087
B08	HEX	RPLP0			Spleen	21.6661
B09	HEX	RPLP0			Spleen	21.9546
B10	HEX	RPLP0			Spleen	22.1291
B11	HEX	RPLP0			Spleen	21.9752
B12	HEX	RPLP0			Spleen	21.9235
C01	HEX	RPLP0			Spleen	22.1693
C02	HEX	RPLP0			Spleen	21.9665
C03	HEX	RPLP0			Spleen	21.8739
C04	HEX	RPLP0			Spleen	21.8978
C05	HEX	RPLP0			Spleen	22.3295
C06	HEX	RPLP0			Spleen	22.022
C07	HEX	RPLP0			Spleen	21.531
C08	HEX	RPLP0			Spleen	21.6566
C09	HEX	RPLP0			Spleen	22.4226
C10	HEX	RPLP0			Spleen	22.0923
C11	HEX	RPLP0			Spleen	22.194
C12	HEX	RPLP0			Spleen	22.1026
D01	HEX	RPLP0			Spleen	22.0745
D02	HEX	RPLP0			Spleen	21.9956
D03	HEX	RPLP0			Spleen	22.0874
D04	HEX	RPLP0			Spleen	22.07
D05	HEX	RPLP0			Spleen	22.4378
D06	HEX	RPLP0			Spleen	22.1863
D07	HEX	RPLP0			Spleen	21.589
D08	HEX	RPLP0			Spleen	21.6601
D09	HEX	RPLP0			Spleen	22.1801
D10	HEX	RPLP0			Spleen	22.2126
D11	HEX	RPLP0			Spleen	22.0995
D12	HEX	RPLP0			Spleen	22.1854
F01	HEX	RPLP0			Spleen	22.116
F02	HEX	RPLP0			Spleen	21.8435
F03	HEX	RPLP0			Spleen	22.4394
F04	HEX	RPLP0			Spleen	22.4131
F05	HEX	RPLP0			Spleen	22.2846
F06	HEX	RPLP0			Spleen	22.2566
F07	HEX	RPLP0			Spleen	21.8126
F08	HEX	RPLP0			Spleen	21.8432
F09	HEX	RPLP0			Spleen	21.7748
F10	HEX	RPLP0			Spleen	21.9061
F11	HEX	RPLP0			Spleen	23.0132
F12	HEX	RPLP0			Spleen	22.989
G01	HEX	RPLP0			Spleen	22.0551
G02	HEX	RPLP0			Spleen	21.9895
G03	HEX	RPLP0			Spleen	22.821
G04	HEX	RPLP0			Spleen	22.9878
G05	HEX	RPLP0			Spleen	22.7129
G06	HEX	RPLP0			Spleen	22.4149
G07	HEX	RPLP0			Spleen	22.1459
G08	HEX	RPLP0			Spleen	22.227
G09	HEX	RPLP0			Spleen	21.9357
G10	HEX	RPLP0			Spleen	22.1381
G11	HEX	RPLP0			Spleen	23.33
G12	HEX	RPLP0			Spleen	23.5505
H01	HEX	RPLP0			Spleen	22.3139
H02	HEX	RPLP0			Spleen	22.1957
H03	HEX	RPLP0			Spleen	22.9157
H04	HEX	RPLP0			Spleen	23.0284
H05	HEX	RPLP0			Spleen	23.0153
H06	HEX	RPLP0			Spleen	22.9383
H07	HEX	RPLP0			Spleen	22.2782
H08	HEX	RPLP0			Spleen	22.391
H09	HEX	RPLP0			Spleen	22.3897
H10	HEX	RPLP0			Spleen	22.2775
H11	HEX	RPLP0			Spleen	23.4057
H12	HEX	RPLP0			Spleen	23.5993
