# Supplementary material for: Loss of Schlafen3 influences the expression levels of Schlafen family members in ileum, thymus, and spleen tissue
Source: PeerJ. 2020 Jan 28;8:e8461. doi: 10.7717/peerj.8461 (PMC6993753; doi:10.7717/peerj.8461)
Supplement: Supplemental Information 11 [file peerj-08-8461-s011.xlsx]

## Sheet: 20190312_TSI SLFN FAM P5
File Name	20190312_TSI SLFN FAM P5.pcrd
Created By User
Notes
ID
Run Started	03/12/2019 21:26:37 UTC
Run Ended	03/12/2019 22:38:48 UTC
Sample Vol	20
Lid Temp	105
Protocol File Name	Unknown.prcl
Plate Setup File Name	DefaultPlate.pltd
Base Serial Number	CT031118
Optical Head Serial Number	785BR9482
CFX Manager Version	3.1.1517.0823.
Well group	All Wells
Amplification step	3
Melt step
Well	Fluor	Target	Sex Genotype	Content	Sample	Cq	Starting Quantity (SQ)
B11	HEX	RPLP0			IM	22.6564
B12	HEX	RPLP0			IM	22.7614
C11	HEX	RPLP0			IM	22.8467
C12	HEX	RPLP0			IM	22.8439
D11	HEX	RPLP0			IM	22.9885
D12	HEX	RPLP0			IM	23.0252
B11	FAM	Slfn1	M WT	53	IM	28.5373	22.6564
B12	FAM	Slfn1			IM	28.6136	22.7614
A11	HEX	Slfn2	M WT	53	IM	22.9253	22.6564
A12	HEX	Slfn2			IM	22.7611	22.7614
C11	FAM	Slfn3	M WT	53	IM	28.7048	22.8467
C12	FAM	Slfn3			IM	28.7322	22.8439
D11	Cy5	Slfn4	M WT	53	IM	23.6577	22.9885
D12	Cy5	Slfn4			IM	23.5137	23.0252
A11	Cy5	Slfn5	M WT	53	IM	28.0465	22.6564
A12	Cy5	Slfn5			IM	28.0044	22.7614
A11	FAM	Slfn8	M WT	53	IM	25.1284	22.6564
A12	FAM	Slfn8			IM	25.0715	22.7614
B11	Cy5	Slfn9	M WT	53	IM	25.5063	22.6564
B12	Cy5	Slfn9			IM	25.5461	22.7614
B01	HEX	RPLP0			Spleen	22.2173
B02	HEX	RPLP0			Spleen	21.9629
B03	HEX	RPLP0			Spleen	21.7449
B04	HEX	RPLP0			Spleen	21.6597
B05	HEX	RPLP0			Spleen	22.1062
B06	HEX	RPLP0			Spleen	22.2417
B07	HEX	RPLP0			Spleen	22.4298
B08	HEX	RPLP0			Spleen	22.6085
C01	HEX	RPLP0			Spleen	22.3076
C02	HEX	RPLP0			Spleen	22.11
C03	HEX	RPLP0			Spleen	21.6531
C04	HEX	RPLP0			Spleen	21.9733
C05	HEX	RPLP0			Spleen	22.2632
C06	HEX	RPLP0			Spleen	21.8797
C07	HEX	RPLP0			Spleen	22.6376
C08	HEX	RPLP0			Spleen	22.6011
D01	HEX	RPLP0			Spleen	22.3193
D02	HEX	RPLP0			Spleen	22.2129
D03	HEX	RPLP0			Spleen	21.9412
D04	HEX	RPLP0			Spleen	21.769
D05	HEX	RPLP0			Spleen	22.3628
D06	HEX	RPLP0			Spleen	22.3607
D07	HEX	RPLP0			Spleen	22.7174
D08	HEX	RPLP0			Spleen	22.6866
F01	HEX	RPLP0			Spleen	22.4457
F02	HEX	RPLP0			Spleen	22.7744
F03	HEX	RPLP0			Spleen	22.3604
F04	HEX	RPLP0			Spleen	22.2009
F05	HEX	RPLP0			Spleen	22.3034
F06	HEX	RPLP0			Spleen	22.339
F07	HEX	RPLP0			Spleen	22.272
F08	HEX	RPLP0			Spleen	22.4106
F09	HEX	RPLP0			Spleen	22.6954
F10	HEX	RPLP0			Spleen	22.7021
F11	HEX	RPLP0			Spleen	22.1922
F12	HEX	RPLP0			Spleen	22.2796
G01	HEX	RPLP0			Spleen	23.0602
G02	HEX	RPLP0			Spleen	22.6537
G03	HEX	RPLP0			Spleen	22.5977
G04	HEX	RPLP0			Spleen	22.6745
G05	HEX	RPLP0			Spleen	22.6035
G06	HEX	RPLP0			Spleen	22.6348
G07	HEX	RPLP0			Spleen	22.849
G08	HEX	RPLP0			Spleen	22.9219
G09	HEX	RPLP0			Spleen	23.0536
G10	HEX	RPLP0			Spleen	23.1433
G11	HEX	RPLP0			Spleen	22.6095
G12	HEX	RPLP0			Spleen	22.6512
H01	HEX	RPLP0			Spleen	23.0112
H02	HEX	RPLP0			Spleen	22.6729
H03	HEX	RPLP0			Spleen	22.6409
H04	HEX	RPLP0			Spleen	22.8458
H05	HEX	RPLP0			Spleen	22.9287
H06	HEX	RPLP0			Spleen	22.9749
H07	HEX	RPLP0			Spleen	22.7663
H08	HEX	RPLP0			Spleen	23.0412
H09	HEX	RPLP0			Spleen	23.414
H10	HEX	RPLP0			Spleen	23.3037
H11	HEX	RPLP0			Spleen	22.4211
H12	HEX	RPLP0			Spleen	22.7691
B01	FAM	Slfn1	F WT	16	Spleen	24.2858	22.2173
B02	FAM	Slfn1			Spleen	24.1309	21.9629
B03	FAM	Slfn1	M WT	17	Spleen	23.6708	21.7449
B04	FAM	Slfn1			Spleen	23.793	21.6597
B07	FAM	Slfn1	M KO	18	Spleen	24.5135	22.4298
B08	FAM	Slfn1			Spleen	24.5636	22.6085
B05	FAM	Slfn1	M WT	20	Spleen	24.4236	22.1062
B06	FAM	Slfn1			Spleen	24.5101	22.2417
F01	FAM	Slfn1	M KO	24	Spleen	24.4667	22.4457
F02	FAM	Slfn1			Spleen	24.3037	22.7744
F03	FAM	Slfn1	F WT	26	Spleen	24.5186	22.3604
F04	FAM	Slfn1			Spleen	24.5547	22.2009
F05	FAM	Slfn1	F WT	27	Spleen	24.4405	22.3034
F06	FAM	Slfn1			Spleen	24.4295	22.339
F07	FAM	Slfn1	F KO	28	Spleen	23.066	22.272
F08	FAM	Slfn1			Spleen	23.1841	22.4106
F09	FAM	Slfn1	M WT	32	Spleen	24.0042	22.6954
F10	FAM	Slfn1			Spleen	23.7783	22.7021
F11	FAM	Slfn1	F KO	38	Spleen	23.6871	22.1922
F12	FAM	Slfn1			Spleen	23.7362	22.2796
A01	HEX	Slfn2	F WT	16	Spleen	20.5432	22.2173
A02	HEX	Slfn2			Spleen	20.3332	21.9629
A03	HEX	Slfn2	M WT	17	Spleen	20.1557	21.7449
A04	HEX	Slfn2			Spleen	20.2597	21.6597
A07	HEX	Slfn2	M KO	18	Spleen	21.0301	22.4298
A08	HEX	Slfn2			Spleen	21.0863	22.6085
A05	HEX	Slfn2	M WT	20	Spleen	20.8284	22.1062
A06	HEX	Slfn2			Spleen	20.7057	22.2417
E01	HEX	Slfn2	M KO	24	Spleen	20.9475	22.4457
E02	HEX	Slfn2			Spleen	20.707	22.7744
E03	HEX	Slfn2	F WT	26	Spleen	20.6125	22.3604
E04	HEX	Slfn2			Spleen	21.0218	22.2009
E05	HEX	Slfn2	F WT	27	Spleen	20.4263	22.3034
E06	HEX	Slfn2			Spleen	20.2755	22.339
E07	HEX	Slfn2	F KO	28	Spleen	19.9522	22.272
E08	HEX	Slfn2			Spleen	20.0609	22.4106
E09	HEX	Slfn2	M WT	32	Spleen	20.4087	22.6954
E10	HEX	Slfn2			Spleen	20.4205	22.7021
E11	HEX	Slfn2	F KO	38	Spleen	19.8646	22.1922
E12	HEX	Slfn2			Spleen	20.0509	22.2796
C01	FAM	Slfn3	F WT	16	Spleen	25.6215	22.3076
C02	FAM	Slfn3			Spleen	25.4859	22.11
C03	FAM	Slfn3	M WT	17	Spleen	25.9933	21.6531
C04	FAM	Slfn3			Spleen	25.9897	21.9733
C07	FAM	Slfn3	M KO	18	Spleen	45.3044	22.6376
C08	FAM	Slfn3			Spleen	44.3695	22.6011
C05	FAM	Slfn3	M WT	20	Spleen	26.8473	22.2632
C06	FAM	Slfn3			Spleen	26.6667	21.8797
G01	FAM	Slfn3	M KO	24	Spleen	46.1471	23.0602
G02	FAM	Slfn3			Spleen	47.6102	22.6537
G03	FAM	Slfn3	F WT	26	Spleen	26.6075	22.5977
G04	FAM	Slfn3			Spleen	26.6656	22.6745
G05	FAM	Slfn3	F WT	27	Spleen	26.493	22.6035
G06	FAM	Slfn3			Spleen	26.3423	22.6348
G07	FAM	Slfn3	F KO	28	Spleen	47.9096	22.849
G08	FAM	Slfn3			Spleen	42.6688	22.9219
G09	FAM	Slfn3	M WT	32	Spleen	27.5968	23.0536
G10	FAM	Slfn3			Spleen	27.5763	23.1433
G11	FAM	Slfn3	F KO	38	Spleen	41.0474	22.6095
G12	FAM	Slfn3			Spleen	41.1874	22.6512
D01	Cy5	Slfn4	F WT	16	Spleen	29.1443	22.3193
D02	Cy5	Slfn4			Spleen	29.0318	22.2129
D03	Cy5	Slfn4	M WT	17	Spleen	25.7521	21.9412
D04	Cy5	Slfn4			Spleen	25.7446	21.769
D07	Cy5	Slfn4	M KO	18	Spleen	29.012	22.7174
D08	Cy5	Slfn4			Spleen	28.9963	22.6866
D05	Cy5	Slfn4	M WT	20	Spleen	27.7239	22.3628
D06	Cy5	Slfn4			Spleen	27.727	22.3607
H01	Cy5	Slfn4	M KO	24	Spleen	31.6682	23.0112
H02	Cy5	Slfn4			Spleen	31.6429	22.6729
H03	Cy5	Slfn4	F WT	26	Spleen	31.018	22.6409
H04	Cy5	Slfn4			Spleen	31.0947	22.8458
H05	Cy5	Slfn4	F WT	27	Spleen	29.7504	22.9287
H06	Cy5	Slfn4			Spleen	29.5763	22.9749
H07	Cy5	Slfn4	F KO	28	Spleen	31.4815	22.7663
H08	Cy5	Slfn4			Spleen	31.7807	23.0412
H09	Cy5	Slfn4	M WT	32	Spleen	30.475	23.414
H10	Cy5	Slfn4			Spleen	30.4295	23.3037
H11	Cy5	Slfn4	F KO	38	Spleen	29.1578	22.4211
H12	Cy5	Slfn4			Spleen	29.3738	22.7691
A01	Cy5	Slfn5	F WT	16	Spleen	25.4896	22.2173
A02	Cy5	Slfn5			Spleen	25.4668	21.9629
A03	Cy5	Slfn5	M WT	17	Spleen	24.8858	21.7449
A04	Cy5	Slfn5			Spleen	25.024	21.6597
A07	Cy5	Slfn5	M KO	18	Spleen	26.6379	22.4298
A08	Cy5	Slfn5			Spleen	26.5876	22.6085
A05	Cy5	Slfn5	M WT	20	Spleen	26.2535	22.1062
A06	Cy5	Slfn5			Spleen	26.1331	22.2417
E01	Cy5	Slfn5	M KO	24	Spleen	26.8018	22.4457
E02	Cy5	Slfn5			Spleen	26.5716	22.7744
E03	Cy5	Slfn5	F WT	26	Spleen	26.1896	22.3604
E04	Cy5	Slfn5			Spleen	26.3128	22.2009
E05	Cy5	Slfn5	F WT	27	Spleen	25.5568	22.3034
E06	Cy5	Slfn5			Spleen	25.4719	22.339
E07	Cy5	Slfn5	F KO	28	Spleen	24.603	22.272
E08	Cy5	Slfn5			Spleen	24.6325	22.4106
E09	Cy5	Slfn5	M WT	32	Spleen	25.7537	22.6954
E10	Cy5	Slfn5			Spleen	25.9253	22.7021
E11	Cy5	Slfn5	F KO	38	Spleen	25.2867	22.1922
E12	Cy5	Slfn5			Spleen	25.2328	22.2796
A01	FAM	Slfn8	F WT	16	Spleen	23.3263	22.2173
A02	FAM	Slfn8			Spleen	23.252	21.9629
A03	FAM	Slfn8	M WT	17	Spleen	23.0616	21.7449
A04	FAM	Slfn8			Spleen	23.046	21.6597
A07	FAM	Slfn8	M KO	18	Spleen	23.35	22.4298
A08	FAM	Slfn8			Spleen	23.3861	22.6085
A05	FAM	Slfn8	M WT	20	Spleen	23.6864	22.1062
A06	FAM	Slfn8			Spleen	23.6113	22.2417
E01	FAM	Slfn8	M KO	24	Spleen	23.4856	22.4457
E02	FAM	Slfn8			Spleen	23.2602	22.7744
E03	FAM	Slfn8	F WT	26	Spleen	23.5287	22.3604
E04	FAM	Slfn8			Spleen	23.6771	22.2009
E05	FAM	Slfn8	F WT	27	Spleen	23.1434	22.3034
E06	FAM	Slfn8			Spleen	23.1356	22.339
E07	FAM	Slfn8	F KO	28	Spleen	22.0352	22.272
E08	FAM	Slfn8			Spleen	21.9737	22.4106
E09	FAM	Slfn8	M WT	32	Spleen	23.4296	22.6954
E10	FAM	Slfn8			Spleen	23.48	22.7021
E11	FAM	Slfn8	F KO	38	Spleen	22.1269	22.1922
E12	FAM	Slfn8			Spleen	22.2108	22.2796
B01	Cy5	Slfn9	F WT	16	Spleen	26.3501	22.2173
B02	Cy5	Slfn9			Spleen	26.2853	21.9629
B03	Cy5	Slfn9	M WT	17	Spleen	25.4059	21.7449
B04	Cy5	Slfn9			Spleen	25.4387	21.6597
B07	Cy5	Slfn9	M KO	18	Spleen	25.051	22.4298
B08	Cy5	Slfn9			Spleen	25.0966	22.6085
B05	Cy5	Slfn9	M WT	20	Spleen	26.4218	22.1062
B06	Cy5	Slfn9			Spleen	26.5139	22.2417
F01	Cy5	Slfn9	M KO	24	Spleen	25.0442	22.4457
F02	Cy5	Slfn9			Spleen	25.0272	22.7744
F03	Cy5	Slfn9	F WT	26	Spleen	26.6734	22.3604
F04	Cy5	Slfn9			Spleen	26.719	22.2009
F05	Cy5	Slfn9	F WT	27	Spleen	25.989	22.3034
F06	Cy5	Slfn9			Spleen	26.0571	22.339
F07	Cy5	Slfn9	F KO	28	Spleen	23.8592	22.272
F08	Cy5	Slfn9			Spleen	23.901	22.4106
F09	Cy5	Slfn9	M WT	32	Spleen	26.674	22.6954
F10	Cy5	Slfn9			Spleen	26.5365	22.7021
F11	Cy5	Slfn9	F KO	38	Spleen	24.148	22.1922
F12	Cy5	Slfn9			Spleen	24.2442	22.2796
B09	HEX	RPLP0			Thymus	21.648
B10	HEX	RPLP0			Thymus	21.5781
C09	HEX	RPLP0			Thymus	21.8256
C10	HEX	RPLP0			Thymus	21.5477
D09	HEX	RPLP0			Thymus	21.5247
D10	HEX	RPLP0			Thymus	21.5785
B09	FAM	Slfn1	M WT	53	Thymus	26.1255	21.648
B10	FAM	Slfn1			Thymus	26.0553	21.5781
A09	HEX	Slfn2	M WT	53	Thymus	20.5769	21.648
A10	HEX	Slfn2			Thymus	20.4863	21.5781
C09	FAM	Slfn3	M WT	53	Thymus	23.4028	21.8256
C10	FAM	Slfn3			Thymus	23.2307	21.5477
D09	Cy5	Slfn4	M WT	53	Thymus	29.0187	21.5247
D10	Cy5	Slfn4			Thymus	29.0275	21.5785
A09	Cy5	Slfn5	M WT	53	Thymus	25.7525	21.648
A10	Cy5	Slfn5			Thymus	25.6915	21.5781
A09	FAM	Slfn8	M WT	53	Thymus	23.1969	21.648
A10	FAM	Slfn8			Thymus	23.2009	21.5781
B09	Cy5	Slfn9	M WT	53	Thymus	24.0783	21.648
B10	Cy5	Slfn9			Thymus	24.023	21.5781
