# Supplementary material for: Loss of Schlafen3 influences the expression levels of Schlafen family members in ileum, thymus, and spleen tissue
Source: PeerJ. 2020 Jan 28;8:e8461. doi: 10.7717/peerj.8461 (PMC6993753; doi:10.7717/peerj.8461)
Supplement: Supplemental Information 13 [file peerj-08-8461-s013.xlsx]

## Sheet: 20190312_TSI SLFN FAM P2
File Name	20190312_TSI SLFN FAM P2.pcrd
Created By User
Notes
ID
Run Started	03/12/2019 17:42:35 UTC
Run Ended	03/12/2019 18:54:08 UTC
Sample Vol	20
Lid Temp	105
Protocol File Name	Unknown.prcl
Plate Setup File Name	DefaultPlate.pltd
Base Serial Number	CT031118
Optical Head Serial Number	785BR9482
CFX Manager Version	3.1.1517.0823.
Well group	All Wells
Amplification step	3
Melt step
Well	Fluor	Target	Sex Genotype	Content	Sample	Cq	Starting Quantity (SQ)
B01	HEX	RPLP0			Thymus	22.431
B02	HEX	RPLP0			Thymus	22.3838
B03	HEX	RPLP0			Thymus	21.6468
B04	HEX	RPLP0			Thymus	21.7646
B05	HEX	RPLP0			Thymus	22.1829
B06	HEX	RPLP0			Thymus	22.1802
B07	HEX	RPLP0			Thymus	21.3884
B08	HEX	RPLP0			Thymus	21.6209
B09	HEX	RPLP0			Thymus	22.5725
B10	HEX	RPLP0			Thymus	22.7917
B11	HEX	RPLP0			Thymus	21.468
B12	HEX	RPLP0			Thymus	21.6408
C01	HEX	RPLP0			Thymus	22.5943
C02	HEX	RPLP0			Thymus	22.395
C03	HEX	RPLP0			Thymus	21.6932
C04	HEX	RPLP0			Thymus	21.9841
C05	HEX	RPLP0			Thymus	22.4077
C06	HEX	RPLP0			Thymus	22.1102
C07	HEX	RPLP0			Thymus	21.7532
C08	HEX	RPLP0			Thymus	21.8842
C09	HEX	RPLP0			Thymus	23.0546
C10	HEX	RPLP0			Thymus	22.8073
C11	HEX	RPLP0			Thymus	21.6337
C12	HEX	RPLP0			Thymus	21.8954
D01	HEX	RPLP0			Thymus	22.847
D02	HEX	RPLP0			Thymus	22.5774
D03	HEX	RPLP0			Thymus	21.9426
D04	HEX	RPLP0			Thymus	21.7186
D05	HEX	RPLP0			Thymus	22.229
D06	HEX	RPLP0			Thymus	22.25
D07	HEX	RPLP0			Thymus	21.7151
D08	HEX	RPLP0			Thymus	21.7577
D09	HEX	RPLP0			Thymus	22.8481
D10	HEX	RPLP0			Thymus	22.986
D11	HEX	RPLP0			Thymus	21.6327
D12	HEX	RPLP0			Thymus	21.6867
F01	HEX	RPLP0			Thymus	22.3766
F02	HEX	RPLP0			Thymus	22.0639
F03	HEX	RPLP0			Thymus	21.7417
F04	HEX	RPLP0			Thymus	21.8688
F05	HEX	RPLP0			Thymus	21.3401
F06	HEX	RPLP0			Thymus	21.3477
F07	HEX	RPLP0			Thymus	22.1377
F08	HEX	RPLP0			Thymus	22.134
F09	HEX	RPLP0			Thymus	21.4356
F10	HEX	RPLP0			Thymus	21.3987
F11	HEX	RPLP0			Thymus	21.918
F12	HEX	RPLP0			Thymus	21.8878
G01	HEX	RPLP0			Thymus	22.5499
G02	HEX	RPLP0			Thymus	22.3889
G03	HEX	RPLP0			Thymus	22.0774
G04	HEX	RPLP0			Thymus	22.1247
G05	HEX	RPLP0			Thymus	21.5468
G06	HEX	RPLP0			Thymus	21.661
G07	HEX	RPLP0			Thymus	22.5293
G08	HEX	RPLP0			Thymus	22.7596
G09	HEX	RPLP0			Thymus	21.7505
G10	HEX	RPLP0			Thymus	21.6723
G11	HEX	RPLP0			Thymus	22.0232
G12	HEX	RPLP0			Thymus	22.479
H01	HEX	RPLP0			Thymus	22.5463
H02	HEX	RPLP0			Thymus	22.3544
H03	HEX	RPLP0			Thymus	22.2119
H04	HEX	RPLP0			Thymus	22.3074
H05	HEX	RPLP0			Thymus	21.906
H06	HEX	RPLP0			Thymus	21.9357
H07	HEX	RPLP0			Thymus	22.7757
H08	HEX	RPLP0			Thymus	22.9162
H09	HEX	RPLP0			Thymus	21.7614
H10	HEX	RPLP0			Thymus	21.7122
H11	HEX	RPLP0			Thymus	22.0561
H12	HEX	RPLP0			Thymus	22.1413
B01	FAM	Slfn1	F WT	16	Thymus	26.5487	22.431
B02	FAM	Slfn1			Thymus	26.4506	22.3838
B03	FAM	Slfn1	M WT	17	Thymus	23.6024	21.6468
B04	FAM	Slfn1			Thymus	23.6187	21.7646
B05	FAM	Slfn1	M KO	18	Thymus	24.5836	22.1829
B06	FAM	Slfn1			Thymus	24.5969	22.1802
B07	FAM	Slfn1	M WT	20	Thymus	24.1323	21.3884
B08	FAM	Slfn1			Thymus	24.1861	21.6209
B09	FAM	Slfn1	F WT	21	Thymus	26.1725	22.5725
B10	FAM	Slfn1			Thymus	26.1192	22.7917
B11	FAM	Slfn1	M KO	23	Thymus	24.1216	21.468
B12	FAM	Slfn1			Thymus	24.2182	21.6408
F01	FAM	Slfn1	M KO	24	Thymus	24.7305	22.3766
F02	FAM	Slfn1			Thymus	24.5558	22.0639
F03	FAM	Slfn1	F WT	26	Thymus	25.1602	21.7417
F04	FAM	Slfn1			Thymus	25.1917	21.8688
F05	FAM	Slfn1	F WT	27	Thymus	23.8084	21.3401
F06	FAM	Slfn1			Thymus	23.7632	21.3477
F07	FAM	Slfn1	F KO	28	Thymus	24.2941	22.1377
F08	FAM	Slfn1			Thymus	24.2885	22.134
F09	FAM	Slfn1	M WT	32	Thymus	24.2771	21.4356
F10	FAM	Slfn1			Thymus	24.206	21.3987
F11	FAM	Slfn1	F KO	38	Thymus	24.7845	21.918
F12	FAM	Slfn1			Thymus	24.9207	21.8878
A01	HEX	Slfn2	F WT	16	Thymus	21.3362	22.431
A02	HEX	Slfn2			Thymus	21.3666	22.3838
A03	HEX	Slfn2	M WT	17	Thymus	19.8449	21.6468
A04	HEX	Slfn2			Thymus	19.9658	21.7646
A05	HEX	Slfn2	M KO	18	Thymus	20.3689	22.1829
A06	HEX	Slfn2			Thymus	20.2099	22.1802
A07	HEX	Slfn2	M WT	20	Thymus	20.1205	21.3884
A08	HEX	Slfn2			Thymus	20.0989	21.6209
A09	HEX	Slfn2	F WT	21	Thymus	21.7289	22.5725
A10	HEX	Slfn2			Thymus	21.7067	22.7917
A11	HEX	Slfn2	M KO	23	Thymus	19.9704	21.468
A12	HEX	Slfn2			Thymus	19.9666	21.6408
E01	HEX	Slfn2	M KO	24	Thymus	20.5253	22.3766
E02	HEX	Slfn2			Thymus	20.2653	22.0639
E03	HEX	Slfn2	F WT	26	Thymus	20.4863	21.7417
E04	HEX	Slfn2			Thymus	20.5759	21.8688
E05	HEX	Slfn2	F WT	27	Thymus	20.0053	21.3401
E06	HEX	Slfn2			Thymus	19.8968	21.3477
E07	HEX	Slfn2	F KO	28	Thymus	20.7054	22.1377
E08	HEX	Slfn2			Thymus	20.7428	22.134
E09	HEX	Slfn2	M WT	32	Thymus	20.0683	21.4356
E10	HEX	Slfn2			Thymus	20.0266	21.3987
E11	HEX	Slfn2	F KO	38	Thymus	20.5801	21.918
E12	HEX	Slfn2			Thymus	20.6193	21.8878
C01	FAM	Slfn3	F WT	16	Thymus	24.5082	22.5943
C02	FAM	Slfn3			Thymus	24.2973	22.395
C03	FAM	Slfn3	M WT	17	Thymus	23.2093	21.6932
C04	FAM	Slfn3			Thymus	23.3645	21.9841
C05	FAM	Slfn3	M KO	18	Thymus	40.8695	22.4077
C06	FAM	Slfn3			Thymus		22.1102
C07	FAM	Slfn3	M WT	20	Thymus	23.1116	21.7532
C08	FAM	Slfn3			Thymus	23.1489	21.8842
C09	FAM	Slfn3	F WT	21	Thymus	25.1423	23.0546
C10	FAM	Slfn3			Thymus	24.8975	22.8073
C11	FAM	Slfn3	M KO	23	Thymus	41.6001	21.6337
C12	FAM	Slfn3			Thymus	44.8504	21.8954
G01	FAM	Slfn3	M KO	24	Thymus	47.5913	22.5499
G02	FAM	Slfn3			Thymus	41.3262	22.3889
G03	FAM	Slfn3	F WT	26	Thymus	23.5771	22.0774
G04	FAM	Slfn3			Thymus	23.6759	22.1247
G05	FAM	Slfn3	F WT	27	Thymus	23.0875	21.5468
G06	FAM	Slfn3			Thymus	23.1668	21.661
G07	FAM	Slfn3	F KO	28	Thymus	42.3075	22.5293
G08	FAM	Slfn3			Thymus	42.215	22.7596
G09	FAM	Slfn3	M WT	32	Thymus	22.94	21.7505
G10	FAM	Slfn3			Thymus	23.0345	21.6723
G11	FAM	Slfn3	F KO	38	Thymus	42.0872	22.0232
G12	FAM	Slfn3			Thymus		22.479
D01	Cy5	Slfn4	F WT	16	Thymus	28.9675	22.847
D02	Cy5	Slfn4			Thymus	28.6686	22.5774
D03	Cy5	Slfn4	M WT	17	Thymus	29.4188	21.9426
D04	Cy5	Slfn4			Thymus	29.2541	21.7186
D05	Cy5	Slfn4	M KO	18	Thymus	28.329	22.229
D06	Cy5	Slfn4			Thymus	28.3358	22.25
D07	Cy5	Slfn4	M WT	20	Thymus	29.3099	21.7151
D08	Cy5	Slfn4			Thymus	29.483	21.7577
D09	Cy5	Slfn4	F WT	21	Thymus	28.5094	22.8481
D10	Cy5	Slfn4			Thymus	28.5657	22.986
D11	Cy5	Slfn4	M KO	23	Thymus	27.8979	21.6327
D12	Cy5	Slfn4			Thymus	27.8069	21.6867
H01	Cy5	Slfn4	M KO	24	Thymus	29.6341	22.5463
H02	Cy5	Slfn4			Thymus	29.5434	22.3544
H03	Cy5	Slfn4	F WT	26	Thymus	29.1949	22.2119
H04	Cy5	Slfn4			Thymus	29.2453	22.3074
H05	Cy5	Slfn4	F WT	27	Thymus	28.9138	21.906
H06	Cy5	Slfn4			Thymus	28.8023	21.9357
H07	Cy5	Slfn4	F KO	28	Thymus	29.3263	22.7757
H08	Cy5	Slfn4			Thymus	29.2322	22.9162
H09	Cy5	Slfn4	M WT	32	Thymus	28.1266	21.7614
H10	Cy5	Slfn4			Thymus	28.2465	21.7122
H11	Cy5	Slfn4	F KO	38	Thymus	28.4365	22.0561
H12	Cy5	Slfn4			Thymus	28.4516	22.1413
A01	Cy5	Slfn5	F WT	16	Thymus	25.5002	22.431
A02	Cy5	Slfn5			Thymus	25.6266	22.3838
A03	Cy5	Slfn5	M WT	17	Thymus	23.6276	21.6468
A04	Cy5	Slfn5			Thymus	23.7342	21.7646
A05	Cy5	Slfn5	M KO	18	Thymus	24.239	22.1829
A06	Cy5	Slfn5			Thymus	24.2291	22.1802
A07	Cy5	Slfn5	M WT	20	Thymus	23.9054	21.3884
A08	Cy5	Slfn5			Thymus	24.047	21.6209
A09	Cy5	Slfn5	F WT	21	Thymus	25.9698	22.5725
A10	Cy5	Slfn5			Thymus	25.9932	22.7917
A11	Cy5	Slfn5	M KO	23	Thymus	23.3804	21.468
A12	Cy5	Slfn5			Thymus	23.5485	21.6408
E01	Cy5	Slfn5	M KO	24	Thymus	24.4808	22.3766
E02	Cy5	Slfn5			Thymus	24.2536	22.0639
E03	Cy5	Slfn5	F WT	26	Thymus	24.7947	21.7417
E04	Cy5	Slfn5			Thymus	24.8213	21.8688
E05	Cy5	Slfn5	F WT	27	Thymus	23.8502	21.3401
E06	Cy5	Slfn5			Thymus	23.6436	21.3477
E07	Cy5	Slfn5	F KO	28	Thymus	24.5622	22.1377
E08	Cy5	Slfn5			Thymus	24.5969	22.134
E09	Cy5	Slfn5	M WT	32	Thymus	24.2892	21.4356
E10	Cy5	Slfn5			Thymus	24.2728	21.3987
E11	Cy5	Slfn5	F KO	38	Thymus	25.0202	21.918
E12	Cy5	Slfn5			Thymus	25.1426	21.8878
A01	FAM	Slfn8	F WT	16	Thymus	23.3728	22.431
A02	FAM	Slfn8			Thymus	23.3692	22.3838
A03	FAM	Slfn8	M WT	17	Thymus	22.6776	21.6468
A04	FAM	Slfn8			Thymus	22.8393	21.7646
A05	FAM	Slfn8	M KO	18	Thymus	22.5157	22.1829
A06	FAM	Slfn8			Thymus	22.4242	22.1802
A07	FAM	Slfn8	M WT	20	Thymus	22.8554	21.3884
A08	FAM	Slfn8			Thymus	22.8867	21.6209
A09	FAM	Slfn8	F WT	21	Thymus	23.5739	22.5725
A10	FAM	Slfn8			Thymus	23.5899	22.7917
A11	FAM	Slfn8	M KO	23	Thymus	21.5267	21.468
A12	FAM	Slfn8			Thymus	21.4173	21.6408
E01	FAM	Slfn8	M KO	24	Thymus	22.1617	22.3766
E02	FAM	Slfn8			Thymus	21.9541	22.0639
E03	FAM	Slfn8	F WT	26	Thymus	22.7409	21.7417
E04	FAM	Slfn8			Thymus	22.8666	21.8688
E05	FAM	Slfn8	F WT	27	Thymus	21.9788	21.3401
E06	FAM	Slfn8			Thymus	21.8538	21.3477
E07	FAM	Slfn8	F KO	28	Thymus	22.1646	22.1377
E08	FAM	Slfn8			Thymus	22.1421	22.134
E09	FAM	Slfn8	M WT	32	Thymus	22.7296	21.4356
E10	FAM	Slfn8			Thymus	22.748	21.3987
E11	FAM	Slfn8	F KO	38	Thymus	22.0196	21.918
E12	FAM	Slfn8			Thymus	22.0473	21.8878
B01	Cy5	Slfn9	F WT	16	Thymus	23.9069	22.431
B02	Cy5	Slfn9			Thymus	23.8069	22.3838
B03	Cy5	Slfn9	M WT	17	Thymus	23.1623	21.6468
B04	Cy5	Slfn9			Thymus	23.1847	21.7646
B05	Cy5	Slfn9	M KO	18	Thymus	22.7906	22.1829
B06	Cy5	Slfn9			Thymus	22.7693	22.1802
B07	Cy5	Slfn9	M WT	20	Thymus	23.1176	21.3884
B08	Cy5	Slfn9			Thymus	23.1504	21.6209
B09	Cy5	Slfn9	F WT	21	Thymus	24.2017	22.5725
B10	Cy5	Slfn9			Thymus	24.0709	22.7917
B11	Cy5	Slfn9	M KO	23	Thymus	21.9197	21.468
B12	Cy5	Slfn9			Thymus	22.3025	21.6408
F01	Cy5	Slfn9	M KO	24	Thymus	22.9437	22.3766
F02	Cy5	Slfn9			Thymus	22.6862	22.0639
F03	Cy5	Slfn9	F WT	26	Thymus	23.5201	21.7417
F04	Cy5	Slfn9			Thymus	23.484	21.8688
F05	Cy5	Slfn9	F WT	27	Thymus	22.5907	21.3401
F06	Cy5	Slfn9			Thymus	22.6297	21.3477
F07	Cy5	Slfn9	F KO	28	Thymus	22.718	22.1377
F08	Cy5	Slfn9			Thymus	22.8245	22.134
F09	Cy5	Slfn9	M WT	32	Thymus	23.1542	21.4356
F10	Cy5	Slfn9			Thymus	23.145	21.3987
F11	Cy5	Slfn9	F KO	38	Thymus	22.8523	21.918
F12	Cy5	Slfn9			Thymus	22.7568	21.8878
