# Supplementary material for: Loss of Schlafen3 influences the expression levels of Schlafen family members in ileum, thymus, and spleen tissue
Source: PeerJ. 2020 Jan 28;8:e8461. doi: 10.7717/peerj.8461 (PMC6993753; doi:10.7717/peerj.8461)
Supplement: Supplemental Information 14 [file peerj-08-8461-s014.xlsx]

## Sheet: 20190312_TSI SLFN FAM P4
File Name	20190312_TSI SLFN FAM P4.pcrd
Created By User
Notes
ID
Run Started	03/12/2019 20:09:26 UTC
Run Ended	03/12/2019 21:21:07 UTC
Sample Vol	20
Lid Temp	105
Protocol File Name	Unknown.prcl
Plate Setup File Name	DefaultPlate.pltd
Base Serial Number	CT031118
Optical Head Serial Number	785BR9482
CFX Manager Version	3.1.1517.0823.
Well group	All Wells
Amplification step	3
Melt step
Well	Fluor	Target		Content	Sample	Cq	Starting Quantity (SQ)	dCt	Ave. dCt			Male	Ave. dCt	1.81646
B01	FAM	Slfn1	F WT	95	Spleen	23.5515	22.0795	1.47203	1.51207			Slfn1	dCt	ddCt	Fold Change	Ave. Fold	Std dev	Ttest
B02	FAM	Slfn1			Spleen	23.459	21.9069	1.5521			M WT	99	2.01075	0.194292	0.874002	1.10324	0.511548
B03	FAM	Slfn1	F KO	96	Spleen	24.2927	21.9814	2.31131	2.34692		M WT	7	1.33222	-0.484239	1.39885
B04	FAM	Slfn1			Spleen	24.3236	21.941	2.38253			M WT	9	1.83771	0.0212487	0.985379
B05	FAM	Slfn1	F WT	97	Spleen	23.3587	22.0778	1.28092	1.32607		M WT	17	2.02957	0.213116	0.862672
B06	FAM	Slfn1			Spleen	23.4627	22.0915	1.37123			M WT	20	2.29293	0.476476	0.718731
B07	FAM	Slfn1	M KO	98	Spleen	24.2919	21.5087	2.78316	2.73365		M WT	32	1.19249	-0.623968	1.54111
B08	FAM	Slfn1			Spleen	24.3502	21.6661	2.68414			M WT	42	3.02944	1.21298	0.431375
B09	FAM	Slfn1	M WT	99	Spleen	24.0194	21.9546	2.06487	2.01075		M WT	49	0.806548	-1.00991	2.01379
B10	FAM	Slfn1			Spleen	24.0857	22.1291	1.95663			M KO	98	2.73365	0.91719	0.529539	1.09463	0.607795	0.97983
B11	FAM	Slfn1	F KO	3	Spleen	23.5823	21.9752	1.60709	1.63373		M KO	18	2.01939	0.202932	0.868783
B12	FAM	Slfn1			Spleen	23.5839	21.9235	1.66038			M KO	24	1.77513	-0.0413273	1.02906
F01	FAM	Slfn1	F KO	4	Spleen	24.1715	22.116	2.05551	2.13656		M KO	46	0.852141	-0.964318	1.95114
F02	FAM	Slfn1			Spleen	24.0611	21.8435	2.21762
F03	FAM	Slfn1	M WT	7	Spleen	23.7937	22.4394	1.3543	1.33222			Female	Ave. dCt	1.46418
F04	FAM	Slfn1			Spleen	23.7233	22.4131	1.31014				Slfn1	dCt	ddCt	Fold Change	Ave. Fold	Std dev	Ttest
F07	FAM	Slfn1	M WT	9	Spleen	23.6381	21.8126	1.82547	1.83771		F WT	95	1.51207	0.0478813	0.967356	1.13282	0.628427
F08	FAM	Slfn1			Spleen	23.6932	21.8432	1.84995			F WT	97	1.32607	-0.138111	1.10046
F09	FAM	Slfn1	F WT	11	Spleen	22.2229	21.7748	0.448131	0.396464		F WT	11	0.396464	-1.06772	2.09612
F10	FAM	Slfn1			Spleen	22.2509	21.9061	0.344796			F WT	16	2.11825	0.654062	0.635489
F11	FAM	Slfn1	F KO	14	Spleen	24.6266	23.0132	1.61343	1.63905		F WT	26	2.25598	0.791794	0.577625
F12	FAM	Slfn1			Spleen	24.6537	22.989	1.66467			F WT	27	2.1138	0.649619	0.637449
B01	FAM	Slfn1	F WT	16	Spleen	24.2858	22.2173	2.06853	2.11825		F WT	45	0.526659	-0.937525	1.91524
B02	FAM	Slfn1			Spleen	24.1309	21.9629	2.16796			F KO	96	2.34692	0.882737	0.542337	1.16113	0.549684	0.92722
B03	FAM	Slfn1	M WT	17	Spleen	23.6708	21.7449	1.92585	2.02957		F KO	3	1.63373	0.169548	0.889121
B04	FAM	Slfn1			Spleen	23.793	21.6597	2.1333			F KO	4	2.13656	0.67238	0.627471
B07	FAM	Slfn1	M KO	18	Spleen	24.5135	22.4298	2.08373	2.01939		F KO	14	1.63905	0.174861	0.885853
B08	FAM	Slfn1			Spleen	24.5636	22.6085	1.95505			F KO	28	0.783751	-0.680433	1.60262
B05	FAM	Slfn1	M WT	20	Spleen	24.4236	22.1062	2.31746	2.29293		F KO	38	1.47575	0.0115633	0.992017
B06	FAM	Slfn1			Spleen	24.5101	22.2417	2.26841			F KO	43	0.691585	-0.772599	1.70834
F01	FAM	Slfn1	M KO	24	Spleen	24.4667	22.4457	2.02097	1.77513		F KO	59	0.434715	-1.02947	2.04127
F02	FAM	Slfn1			Spleen	24.3037	22.7744	1.52929
F03	FAM	Slfn1	F WT	26	Spleen	24.5186	22.3604	2.15816	2.25598
F04	FAM	Slfn1			Spleen	24.5547	22.2009	2.3538
F05	FAM	Slfn1	F WT	27	Spleen	24.4405	22.3034	2.13706	2.1138
F06	FAM	Slfn1			Spleen	24.4295	22.339	2.09055
F07	FAM	Slfn1	F KO	28	Spleen	23.066	22.272	0.794005	0.783751
F08	FAM	Slfn1			Spleen	23.1841	22.4106	0.773497
F09	FAM	Slfn1	M WT	32	Spleen	24.0042	22.6954	1.3088	1.19249
F10	FAM	Slfn1			Spleen	23.7783	22.7021	1.07618
F11	FAM	Slfn1	F KO	38	Spleen	23.6871	22.1922	1.4949	1.47575
F12	FAM	Slfn1			Spleen	23.7362	22.2796	1.4566
B07	FAM	Slfn1	M WT	42	Spleen	24.0676	21.114	2.95355	3.02944
B08	FAM	Slfn1			Spleen	24.2087	21.1033	3.10533
B09	FAM	Slfn1	F KO	43	Spleen	23.3375	22.6568	0.680725	0.691585
B10	FAM	Slfn1			Spleen	23.4115	22.709	0.702446
B11	FAM	Slfn1	F WT	45	Spleen	23.14	22.6377	0.502281	0.526659
B12	FAM	Slfn1			Spleen	23.2251	22.6741	0.551037
F07	FAM	Slfn1	M KO	46	Spleen	24.5355	23.4692	1.06637	0.852141
F08	FAM	Slfn1			Spleen	24.6105	23.9726	0.637914
F09	FAM	Slfn1	M WT	49	Spleen	23.5303	22.7054	0.824941	0.806548
F10	FAM	Slfn1			Spleen	23.4727	22.6846	0.788155
F11	FAM	Slfn1	F KO	59	Spleen	23.0943	22.6136	0.480665	0.434715
F12	FAM	Slfn1			Spleen	23.1245	22.7357	0.388765
												Male	Ave. dCt	-1.63646
A01	HEX	Slfn2	F WT	95	Spleen	20.1045	22.0795	-1.97502	-1.87581			Slfn2	dCt	ddCt	Fold Change	Ave. Fold	Std dev	Ttest
A02	HEX	Slfn2			Spleen	20.1303	21.9069	-1.7766			M WT	99	-1.42407	0.212388	0.863108	1.08625	0.412738
A03	HEX	Slfn2	F KO	96	Spleen	20.4345	21.9814	-1.5469	-1.4583		M WT	7	-2.16472	-0.528259	1.44219
A04	HEX	Slfn2			Spleen	20.5713	21.941	-1.36971			M WT	9	-1.8597	-0.223239	1.16735
A05	HEX	Slfn2	F WT	97	Spleen	20.1096	22.0778	-1.96816	-2.03762		M WT	17	-1.49463	0.141832	0.906367
A06	HEX	Slfn2			Spleen	19.9844	22.0915	-2.10708			M WT	20	-1.40688	0.229575	0.852886
A07	HEX	Slfn2	M KO	98	Spleen	20.7166	21.5087	-0.792151	-0.847461		M WT	32	-2.28417	-0.647711	1.56668
A08	HEX	Slfn2			Spleen	20.7633	21.6661	-0.902771			M WT	42	-0.22001	1.41645	0.374633
A09	HEX	Slfn2	M WT	99	Spleen	20.6934	21.9546	-1.26114	-1.42407		M WT	49	-2.2375	-0.601036	1.51681
A10	HEX	Slfn2			Spleen	20.5421	22.1291	-1.587			M KO	98	-0.847461	0.788999	0.578745	1.04683	0.43707	0.881269
A11	HEX	Slfn2	F KO	3	Spleen	19.856	21.9752	-2.11923	-2.02351		M KO	18	-1.46095	0.175514	0.885452
A12	HEX	Slfn2			Spleen	19.9957	21.9235	-1.92779			M KO	24	-1.7828	-0.146339	1.10676
E01	HEX	Slfn2	F KO	4	Spleen	20.1294	22.116	-1.98655	-1.92233		M KO	46	-2.3292	-0.692739	1.61635
E02	HEX	Slfn2			Spleen	19.9854	21.8435	-1.85812
E03	HEX	Slfn2	M WT	7	Spleen	20.2375	22.4394	-2.20193	-2.16472			Female	Ave. dCt	-2.02359
E04	HEX	Slfn2			Spleen	20.2856	22.4131	-2.1275				Slfn2	dCt	ddCt	Fold Change	Ave. Fold	Std dev	Ttest
E07	HEX	Slfn2	M WT	9	Spleen	19.921	21.8126	-1.89155	-1.8597		F WT	95	-1.87581	0.147775	0.902641	1.04294	0.34244
E08	HEX	Slfn2			Spleen	20.0154	21.8432	-1.82784			F WT	97	-2.03762	-0.0140333	1.00977
E09	HEX	Slfn2	F WT	11	Spleen	19.0895	21.7748	-2.68528	-2.77435		F WT	11	-2.77435	-0.750764	1.68268
E10	HEX	Slfn2			Spleen	19.0427	21.9061	-2.86342			F WT	16	-1.65188	0.371712	0.772865
E11	HEX	Slfn2	F KO	14	Spleen	21.1109	23.0132	-1.90231	-1.89917		F WT	26	-1.46353	0.560055	0.678276
E12	HEX	Slfn2			Spleen	21.093	22.989	-1.89604			F WT	27	-1.97028	0.0533056	0.963726
A01	HEX	Slfn2	F WT	16	Spleen	20.5432	22.2173	-1.67408	-1.65188		F WT	45	-2.39164	-0.36805	1.29061
A02	HEX	Slfn2			Spleen	20.3332	21.9629	-1.62967			F KO	96	-1.4583	0.565284	0.675822	1.0741	0.276	0.848244
A03	HEX	Slfn2	M WT	17	Spleen	20.1557	21.7449	-1.58924	-1.49463		F KO	3	-2.02351	8.08664e-05	0.999944
A04	HEX	Slfn2			Spleen	20.2597	21.6597	-1.40001			F KO	4	-1.92233	0.101256	0.932221
A07	HEX	Slfn2	M KO	18	Spleen	21.0301	22.4298	-1.39967	-1.46095		F KO	14	-1.89917	0.124414	0.917376
A08	HEX	Slfn2			Spleen	21.0863	22.6085	-1.52222			F KO	28	-2.33473	-0.311143	1.24069
A05	HEX	Slfn2	M WT	20	Spleen	20.8284	22.1062	-1.27781	-1.40688		F KO	38	-2.27811	-0.254522	1.19294
A06	HEX	Slfn2			Spleen	20.7057	22.2417	-1.53596			F KO	43	-2.06625	-0.0426575	1.03001
E01	HEX	Slfn2	M KO	24	Spleen	20.9475	22.4457	-1.49819	-1.7828		F KO	59	-2.7051	-0.681508	1.60381
E02	HEX	Slfn2			Spleen	20.707	22.7744	-2.06741
E03	HEX	Slfn2	F WT	26	Spleen	20.6125	22.3604	-1.74797	-1.46353
E04	HEX	Slfn2			Spleen	21.0218	22.2009	-1.1791
E05	HEX	Slfn2	F WT	27	Spleen	20.4263	22.3034	-1.87713	-1.97028
E06	HEX	Slfn2			Spleen	20.2755	22.339	-2.06344
E07	HEX	Slfn2	F KO	28	Spleen	19.9522	22.272	-2.31974	-2.33473
E08	HEX	Slfn2			Spleen	20.0609	22.4106	-2.34973
E09	HEX	Slfn2	M WT	32	Spleen	20.4087	22.6954	-2.28673	-2.28417
E10	HEX	Slfn2			Spleen	20.4205	22.7021	-2.28162
E11	HEX	Slfn2	F KO	38	Spleen	19.8646	22.1922	-2.32756	-2.27811
E12	HEX	Slfn2			Spleen	20.0509	22.2796	-2.22866
A07	HEX	Slfn2	M WT	42	Spleen	20.8443	21.114	-0.269784	-0.22001
A08	HEX	Slfn2			Spleen	20.9331	21.1033	-0.170236
A09	HEX	Slfn2	F KO	43	Spleen	20.5782	22.6568	-2.0786	-2.06625
A10	HEX	Slfn2			Spleen	20.6551	22.709	-2.05389
A11	HEX	Slfn2	F WT	45	Spleen	20.3223	22.6377	-2.31533	-2.39164
A12	HEX	Slfn2			Spleen	20.2061	22.6741	-2.46795
E07	HEX	Slfn2	M KO	46	Spleen	21.39	23.4692	-2.07915	-2.3292
E08	HEX	Slfn2			Spleen	21.3934	23.9726	-2.57924
E09	HEX	Slfn2	M WT	49	Spleen	20.4533	22.7054	-2.25204	-2.2375
E10	HEX	Slfn2			Spleen	20.4616	22.6846	-2.22295
E11	HEX	Slfn2	F KO	59	Spleen	19.9478	22.6136	-2.6658	-2.7051
E12	HEX	Slfn2			Spleen	19.9914	22.7357	-2.7444
C01	FAM	Slfn3	F WT	95	Spleen	25.3666	22.1693	3.19734	3.33129			Male	Ave. dCt	4.47696
C02	FAM	Slfn3			Spleen	25.4318	21.9665	3.46525				Slfn3	dCt	ddCt	Fold Change	Ave. Fold	Std dev	Ttest
C03	FAM	Slfn3	F KO	96	Spleen	42.3378	21.8739	20.4639	19.9277		M WT	99	5.87992	1.40297	0.378151	1.12937	0.597901
C04	FAM	Slfn3			Spleen	41.2893	21.8978	19.3915			M WT	7	3.78115	-0.695802	1.61978
C05	FAM	Slfn3	F WT	97	Spleen	25.9738	22.3295	3.64437	3.70756		M WT	9	4.72628	0.249323	0.841291
C06	FAM	Slfn3			Spleen	25.7927	22.022	3.77075			M WT	17	4.17829	-0.29867	1.23001
C07	FAM	Slfn3	M KO	98	Spleen	41.4758	21.531	19.9448	18.8067		M WT	20	4.68555	0.208594	0.86538
C08	FAM	Slfn3			Spleen	39.3251	21.6566	17.6686			M WT	32	4.48808	0.011126	0.992318
C09	FAM	Slfn3	M WT	99	Spleen	28.2202	22.4226	5.79766	5.87992		M WT	42	3.26654	-1.21042	2.31405
C10	FAM	Slfn3			Spleen	28.0545	22.0923	5.96218			M WT	49	4.80984	0.332883	0.793948
C11	FAM	Slfn3	F KO	3	Spleen	46.9627	22.194	24.7687	20.9459		M KO	98	18.8067	14.3297	4.85655e-05	1.81967e-05	2.15509e-05	0.00419989
C12	FAM	Slfn3			Spleen	39.2257	22.1026	17.1231			M KO	18	22.2176	17.7406	4.56599e-06
G01	FAM	Slfn3	F KO	4	Spleen	43.2701	22.0551	21.215	24.0472		M KO	24	24.0217	19.5447	1.30751e-06
G02	FAM	Slfn3			Spleen	48.869	21.9895	26.8794			M KO	46	20.211	15.734	1.8348e-05
G03	FAM	Slfn3	M WT	7	Spleen	26.618	22.821	3.79706	3.78115
G04	FAM	Slfn3			Spleen	26.753	22.9878	3.76525				Female	Ave. dCt	3.6125
G07	FAM	Slfn3	M WT	9	Spleen	26.7588	22.1459	4.61291	4.72628			Slfn3	dCt	ddCt	Fold Change	Ave. Fold	Std dev	Ttest
G08	FAM	Slfn3			Spleen	27.0666	22.227	4.83965			F WT	95	3.33129	-0.281205	1.21521	1.0147	0.185526
G09	FAM	Slfn3	F WT	11	Spleen	25.2846	21.9357	3.34889	3.35626		F WT	97	3.70756	0.095061	0.936233
G10	FAM	Slfn3			Spleen	25.5017	22.1381	3.36362			F WT	11	3.35626	-0.256244	1.19437
G11	FAM	Slfn3	F KO	14	Spleen	50	23.33	26.67	24.5741		F WT	16	3.34488	-0.267618	1.20382
G12	FAM	Slfn3			Spleen	46.0287	23.5505	22.4782			F WT	26	4.00047	0.387975	0.764201
C01	FAM	Slfn3	F WT	16	Spleen	25.6215	22.3076	3.31387	3.34488		F WT	27	3.79853	0.18603	0.879021
C02	FAM	Slfn3			Spleen	25.4859	22.11	3.37589			F WT	45	3.7485	0.136001	0.910038
C03	FAM	Slfn3	M WT	17	Spleen	25.9933	21.6531	4.34017	4.17829		F KO	96	19.9277	16.3152	1.22639e-05	9.39479e-06	1.17627e-05	8.81042e-10
C04	FAM	Slfn3			Spleen	25.9897	21.9733	4.0164			F KO	3	20.9459	17.3334	6.05501e-06
C07	FAM	Slfn3	M KO	18	Spleen	45.3044	22.6376	22.6668	22.2176		F KO	4	24.0472	20.4347	7.05561e-07
C08	FAM	Slfn3			Spleen	44.3695	22.6011	21.7684			F KO	14	24.5741	20.9616	4.89707e-07
C05	FAM	Slfn3	M WT	20	Spleen	26.8473	22.2632	4.58412	4.68555		F KO	28	22.4038	18.7913	2.20427e-06
C06	FAM	Slfn3			Spleen	26.6667	21.8797	4.78698			F KO	38	18.487	14.8745	3.32901e-05
G01	FAM	Slfn3	M KO	24	Spleen	46.1471	23.0602	23.0869	24.0217		F KO	43	23.8027	20.1902	8.35875e-07
G02	FAM	Slfn3			Spleen	47.6102	22.6537	24.9565			F KO	59	19.2725	15.66	1.93139e-05
G03	FAM	Slfn3	F WT	26	Spleen	26.6075	22.5977	4.00983	4.00047
G04	FAM	Slfn3			Spleen	26.6656	22.6745	3.99112
G05	FAM	Slfn3	F WT	27	Spleen	26.493	22.6035	3.88953	3.79853
G06	FAM	Slfn3			Spleen	26.3423	22.6348	3.70753
G07	FAM	Slfn3	F KO	28	Spleen	47.9096	22.849	25.0606	22.4038
G08	FAM	Slfn3			Spleen	42.6688	22.9219	19.7469
G09	FAM	Slfn3	M WT	32	Spleen	27.5968	23.0536	4.54324	4.48808
G10	FAM	Slfn3			Spleen	27.5763	23.1433	4.43292
G11	FAM	Slfn3	F KO	38	Spleen	41.0474	22.6095	18.4379	18.487
G12	FAM	Slfn3			Spleen	41.1874	22.6512	18.5362
C07	FAM	Slfn3	M WT	42	Spleen	24.576	21.2317	3.34438	3.26654
C08	FAM	Slfn3			Spleen	24.475	21.2863	3.18869
C09	FAM	Slfn3	F KO	43	Spleen	50	23.128	26.872	23.8027
C10	FAM	Slfn3			Spleen	43.6258	22.8923	20.7335
C11	FAM	Slfn3	F WT	45	Spleen	26.6444	22.878	3.76637	3.7485
C12	FAM	Slfn3			Spleen	26.6185	22.8879	3.73063
G07	FAM	Slfn3	M KO	46	Spleen	41.2814	24.15	17.1314	20.211
G08	FAM	Slfn3			Spleen	47.5408	24.2503	23.2905
G09	FAM	Slfn3	M WT	49	Spleen	28.0483	23.2854	4.76291	4.80984
G10	FAM	Slfn3			Spleen	28.1139	23.2571	4.85677
G11	FAM	Slfn3	F KO	59	Spleen	41.7158	23.1721	18.5437	19.2725
G12	FAM	Slfn3			Spleen	43.2883	23.2869	20.0013
D01	Cy5	Slfn4	F WT	95	Spleen	28.3838	22.0745	6.30924	6.34872			Male	Ave. dCt	6.08584
D02	Cy5	Slfn4			Spleen	28.3838	21.9956	6.3882				Slfn4	dCt	ddCt	Fold Change	Ave. Fold	Std dev	Ttest
D03	Cy5	Slfn4	F KO	96	Spleen	28.8406	22.0874	6.75312	6.66542		M WT	99	7.86783	1.78199	0.290782	1.46779	1.4236
D04	Cy5	Slfn4			Spleen	28.6478	22.07	6.57772			M WT	7	6.3768	0.290958	0.817359
D05	Cy5	Slfn4	F WT	97	Spleen	28.1591	22.4378	5.72129	5.79816		M WT	9	5.70401	-0.381826	1.30299
D06	Cy5	Slfn4			Spleen	28.0613	22.1863	5.87502			M WT	17	3.8932	-2.19264	4.57142
D07	Cy5	Slfn4	M KO	98	Spleen	27.5278	21.589	5.93876	5.97352		M WT	20	5.36368	-0.722161	1.64965
D08	Cy5	Slfn4			Spleen	27.6684	21.6601	6.00829			M WT	32	7.09338	1.00754	0.497392
D09	Cy5	Slfn4	M WT	99	Spleen	30.0152	22.1801	7.83518	7.86783		M WT	42	4.93137	-1.15447	2.22602
D10	Cy5	Slfn4			Spleen	30.1131	22.2126	7.90048			M WT	49	7.45645	1.37061	0.386728
D11	Cy5	Slfn4	F KO	3	Spleen	27.7731	22.0995	5.67358	5.60564		M KO	98	5.97352	-0.112315	1.08096	0.962635	0.662211	0.522596
D12	Cy5	Slfn4			Spleen	27.7231	22.1854	5.5377			M KO	18	6.30218	0.216336	0.860748
H01	Cy5	Slfn4	F KO	4	Spleen	28.5437	22.3139	6.22984	6.24426		M KO	24	8.81351	2.72768	0.150969
H02	Cy5	Slfn4			Spleen	28.4544	22.1957	6.25867			M KO	46	5.27202	-0.813821	1.75786
H03	Cy5	Slfn4	M WT	7	Spleen	29.3364	22.9157	6.42068	6.3768
H04	Cy5	Slfn4			Spleen	29.3613	23.0284	6.33292				Female	Ave. dCt	6.93479
H07	Cy5	Slfn4	M WT	9	Spleen	28.0514	22.2782	5.77316	5.70401			Slfn4	dCt	ddCt	Fold Change	Ave. Fold	Std dev	Ttest
H08	Cy5	Slfn4			Spleen	28.0259	22.391	5.63486			F WT	95	6.34872	-0.586067	1.50115	1.17692	0.639488
H09	Cy5	Slfn4	F WT	11	Spleen	28.6902	22.3897	6.30048	6.36424		F WT	97	5.79816	-1.13663	2.19867
H10	Cy5	Slfn4			Spleen	28.7055	22.2775	6.42799			F WT	11	6.36424	-0.570552	1.48509
H11	Cy5	Slfn4	F KO	14	Spleen	30.1556	23.4057	6.74989	6.64969		F WT	16	6.82191	-0.112879	1.08138
H12	Cy5	Slfn4			Spleen	30.1488	23.5993	6.54949			F WT	26	8.31297	1.37819	0.384702
D01	Cy5	Slfn4	F WT	16	Spleen	29.1443	22.3193	6.82497	6.82191		F WT	27	6.71153	-0.223262	1.16737
D02	Cy5	Slfn4			Spleen	29.0318	22.2129	6.81885			F WT	45	8.18599	1.2512	0.420097
D03	Cy5	Slfn4	M WT	17	Spleen	25.7521	21.9412	3.81087	3.8932		F KO	96	6.66542	-0.269372	1.20528	1.08168	0.780578	0.801964
D04	Cy5	Slfn4			Spleen	25.7446	21.769	3.97553			F KO	3	5.60564	-1.32915	2.51254
D07	Cy5	Slfn4	M KO	18	Spleen	29.012	22.7174	6.29465	6.30218		F KO	4	6.24426	-0.69053	1.61388
D08	Cy5	Slfn4			Spleen	28.9963	22.6866	6.3097			F KO	14	6.64969	-0.285101	1.2185
D05	Cy5	Slfn4	M WT	20	Spleen	27.7239	22.3628	5.36106	5.36368		F KO	28	8.7274	1.79261	0.288649
D06	Cy5	Slfn4			Spleen	27.727	22.3607	5.36629			F KO	38	6.67073	-0.264061	1.20085
H01	Cy5	Slfn4	M KO	24	Spleen	31.6682	23.0112	8.65698	8.81351		F KO	43	9.78739	2.8526	0.138446
H02	Cy5	Slfn4			Spleen	31.6429	22.6729	8.97005			F KO	59	8.00798	1.07319	0.475267
H03	Cy5	Slfn4	F WT	26	Spleen	31.018	22.6409	8.37705	8.31297
H04	Cy5	Slfn4			Spleen	31.0947	22.8458	8.2489
H05	Cy5	Slfn4	F WT	27	Spleen	29.7504	22.9287	6.82162	6.71153
H06	Cy5	Slfn4			Spleen	29.5763	22.9749	6.60143
H07	Cy5	Slfn4	F KO	28	Spleen	31.4815	22.7663	8.71522	8.7274
H08	Cy5	Slfn4			Spleen	31.7807	23.0412	8.73958
H09	Cy5	Slfn4	M WT	32	Spleen	30.475	23.414	7.06096	7.09338
H10	Cy5	Slfn4			Spleen	30.4295	23.3037	7.12581
H11	Cy5	Slfn4	F KO	38	Spleen	29.1578	22.4211	6.7367	6.67073
H12	Cy5	Slfn4			Spleen	29.3738	22.7691	6.60476
D07	Cy5	Slfn4	M WT	42	Spleen	26.1418	21.2682	4.87359	4.93137
D08	Cy5	Slfn4			Spleen	26.1607	21.1715	4.98915
D09	Cy5	Slfn4	F KO	43	Spleen	32.5574	23.0532	9.5042	9.78739
D10	Cy5	Slfn4			Spleen	33.1608	23.0903	10.0706
D11	Cy5	Slfn4	F WT	45	Spleen	31.104	22.9097	8.1943	8.18599
D12	Cy5	Slfn4			Spleen	31.1226	22.9449	8.17769
H07	Cy5	Slfn4	M KO	46	Spleen	29.5645	24.2761	5.28842	5.27202
H08	Cy5	Slfn4			Spleen	29.3953	24.1397	5.25561
H09	Cy5	Slfn4	M WT	49	Spleen	30.8923	23.2711	7.62119	7.45645
H10	Cy5	Slfn4			Spleen	30.6592	23.3675	7.2917
H11	Cy5	Slfn4	F KO	59	Spleen	31.1882	23.1624	8.02583	8.00798
H12	Cy5	Slfn4			Spleen	31.2607	23.2706	7.99012
A01	Cy5	Slfn5	F WT	95	Spleen	24.5674	22.0795	2.48796	2.57366			Male	Ave. dCt	3.39406
A02	Cy5	Slfn5			Spleen	24.5663	21.9069	2.65935				Slfn5	dCt	ddCt	Fold Change	Ave. Fold	Std dev	Ttest
A03	Cy5	Slfn5	F KO	96	Spleen	25.1572	21.9814	3.17582	3.18475		M WT	99	3.92175	0.52769	0.693664	1.06917	0.423958
A04	Cy5	Slfn5			Spleen	25.1347	21.941	3.19369			M WT	7	2.51599	-0.878067	1.83791
A05	Cy5	Slfn5	F WT	97	Spleen	24.5156	22.0778	2.43784	2.35201		M WT	9	2.85577	-0.538288	1.45225
A06	Cy5	Slfn5			Spleen	24.3577	22.0915	2.26618			M WT	17	3.25256	-0.141501	1.10305
A07	Cy5	Slfn5	M KO	98	Spleen	25.5966	21.5087	4.0879	4.02204		M WT	20	4.01937	0.625309	0.648281
A08	Cy5	Slfn5			Spleen	25.6223	21.6661	3.95618			M WT	32	3.14074	-0.253323	1.19195
A09	Cy5	Slfn5	M WT	99	Spleen	25.9908	21.9546	4.0362	3.92175		M WT	42	4.02149	0.627431	0.647328
A10	Cy5	Slfn5			Spleen	25.9364	22.1291	3.80731			M WT	49	3.42481	0.0307493	0.978912
A11	Cy5	Slfn5	F KO	3	Spleen	24.4458	21.9752	2.4706	2.51177		M KO	98	4.02204	0.62798	0.647082	0.863907	0.470718	0.462293
A12	Cy5	Slfn5			Spleen	24.4764	21.9235	2.55294			M KO	18	4.0936	0.69954	0.615768
E01	Cy5	Slfn5	F KO	4	Spleen	25.2641	22.116	3.14814	3.18641		M KO	24	4.07658	0.682516	0.623078
E02	Cy5	Slfn5			Spleen	25.0682	21.8435	3.22469			M KO	46	2.74357	-0.650488	1.5697
E03	Cy5	Slfn5	M WT	7	Spleen	24.8657	22.4394	2.4263	2.51599
E04	Cy5	Slfn5			Spleen	25.0188	22.4131	2.60569				Female	Ave. dCt	2.73681
E07	Cy5	Slfn5	M WT	9	Spleen	24.6976	21.8126	2.885	2.85577			Slfn5	dCt	ddCt	Fold Change	Ave. Fold	Std dev	Ttest
E08	Cy5	Slfn5			Spleen	24.6698	21.8432	2.82654			F WT	95	2.57366	-0.163154	1.11973	1.13426	0.577796
E09	Cy5	Slfn5	F WT	11	Spleen	23.6758	21.7748	1.90103	1.84054		F WT	97	2.35201	-0.384795	1.30567
E10	Cy5	Slfn5			Spleen	23.6861	21.9061	1.78006			F WT	11	1.84054	-0.896267	1.86124
E11	Cy5	Slfn5	F KO	14	Spleen	25.8258	23.0132	2.81259	2.91702		F WT	16	3.38813	0.651319	0.636698
E12	Cy5	Slfn5			Spleen	26.0105	22.989	3.02145			F WT	26	3.97058	1.23377	0.425205
A01	Cy5	Slfn5	F WT	16	Spleen	25.4896	22.2173	3.27233	3.38813		F WT	27	3.19315	0.456344	0.728831
A02	Cy5	Slfn5			Spleen	25.4668	21.9629	3.50393			F WT	45	1.83959	-0.897217	1.86247
A03	Cy5	Slfn5	M WT	17	Spleen	24.8858	21.7449	3.14086	3.25256		F KO	96	3.18475	0.447945	0.733086	1.01153	0.277683	0.600888
A04	Cy5	Slfn5			Spleen	25.024	21.6597	3.36426			F KO	3	2.51177	-0.225043	1.16881
A07	Cy5	Slfn5	M KO	18	Spleen	26.6379	22.4298	4.20811	4.0936		F KO	4	3.18641	0.449604	0.732244
A08	Cy5	Slfn5			Spleen	26.5876	22.6085	3.9791			F KO	14	2.91702	0.180213	0.882572
A05	Cy5	Slfn5	M WT	20	Spleen	26.2535	22.1062	4.14737	4.01937		F KO	28	2.27646	-0.460349	1.37587
A06	Cy5	Slfn5			Spleen	26.1331	22.2417	3.89137			F KO	38	3.02385	0.287039	0.819582
E01	Cy5	Slfn5	M KO	24	Spleen	26.8018	22.4457	4.35601	4.07658		F KO	43	2.80167	0.0648571	0.95604
E02	Cy5	Slfn5			Spleen	26.5716	22.7744	3.79714			F KO	59	2.22679	-0.510016	1.42407
E03	Cy5	Slfn5	F WT	26	Spleen	26.1896	22.3604	3.82921	3.97058
E04	Cy5	Slfn5			Spleen	26.3128	22.2009	4.11195
E05	Cy5	Slfn5	F WT	27	Spleen	25.5568	22.3034	3.25334	3.19315
E06	Cy5	Slfn5			Spleen	25.4719	22.339	3.13296
E07	Cy5	Slfn5	F KO	28	Spleen	24.603	22.272	2.331	2.27646
E08	Cy5	Slfn5			Spleen	24.6325	22.4106	2.22192
E09	Cy5	Slfn5	M WT	32	Spleen	25.7537	22.6954	3.05833	3.14074
E10	Cy5	Slfn5			Spleen	25.9253	22.7021	3.22315
E11	Cy5	Slfn5	F KO	38	Spleen	25.2867	22.1922	3.09448	3.02385
E12	Cy5	Slfn5			Spleen	25.2328	22.2796	2.95322
A07	Cy5	Slfn5	M WT	42	Spleen	25.0654	21.114	3.95137	4.02149
A08	Cy5	Slfn5			Spleen	25.1949	21.1033	4.09162
A09	Cy5	Slfn5	F KO	43	Spleen	25.4946	22.6568	2.83785	2.80167
A10	Cy5	Slfn5			Spleen	25.4745	22.709	2.76548
A11	Cy5	Slfn5	F WT	45	Spleen	24.5026	22.6377	1.86498	1.83959
A12	Cy5	Slfn5			Spleen	24.4883	22.6741	1.81421
E07	Cy5	Slfn5	M KO	46	Spleen	26.4251	23.4692	2.95596	2.74357
E08	Cy5	Slfn5			Spleen	26.5038	23.9726	2.53119
E09	Cy5	Slfn5	M WT	49	Spleen	26.1564	22.7054	3.45106	3.42481
E10	Cy5	Slfn5			Spleen	26.0831	22.6846	3.39856
E11	Cy5	Slfn5	F KO	59	Spleen	24.7528	22.6136	2.1392	2.22679
E12	Cy5	Slfn5			Spleen	25.0501	22.7357	2.31439
A01	FAM	Slfn8	F WT	95	Spleen	23.0559	22.0795	0.976373	0.975714			Male	Ave. dCt	0.948983
A02	FAM	Slfn8			Spleen	22.882	21.9069	0.975055				Slfn8	dCt	ddCt	Fold Change	Ave. Fold	Std dev	Ttest
A03	FAM	Slfn8	F KO	96	Spleen	22.6159	21.9814	0.634464	0.633652		M WT	99	1.06229	0.113304	0.924468	1.10842	0.497715
A04	FAM	Slfn8			Spleen	22.5739	21.941	0.632839			M WT	7	0.226536	-0.722447	1.64998
A05	FAM	Slfn8	F WT	97	Spleen	22.9729	22.0778	0.895151	0.891883		M WT	9	0.352618	-0.596365	1.5119
A06	FAM	Slfn8			Spleen	22.9801	22.0915	0.888614			M WT	17	1.35147	0.402487	0.756553
A07	FAM	Slfn8	M KO	98	Spleen	22.6342	21.5087	1.12547	1.08058		M WT	20	1.47495	0.525968	0.694493
A08	FAM	Slfn8			Spleen	22.7018	21.6661	1.03569			M WT	32	0.756074	-0.192909	1.14307
A09	FAM	Slfn8	M WT	99	Spleen	23.0995	21.9546	1.14492	1.06229		M WT	42	2.25219	1.3032	0.405225
A10	FAM	Slfn8			Spleen	23.1087	22.1291	0.979658			M WT	49	0.115739	-0.833244	1.78169
A11	FAM	Slfn8	F KO	3	Spleen	21.8575	21.9752	-0.117775	-0.0756886		M KO	98	1.08058	0.1316	0.912818	1.77161	1.46466	0.258478
A12	FAM	Slfn8			Spleen	21.8899	21.9235	-0.0336027			M KO	18	0.848899	-0.100084	1.07184
E01	FAM	Slfn8	F KO	4	Spleen	22.3659	22.116	0.249954	0.29407		M KO	24	0.762793	-0.18619	1.13775
E02	FAM	Slfn8			Spleen	22.1817	21.8435	0.338186			M KO	46	-1.03798	-1.98697	3.96403
E03	FAM	Slfn8	M WT	7	Spleen	22.5517	22.4394	0.112267	0.226536
E04	FAM	Slfn8			Spleen	22.754	22.4131	0.340806				Female	Ave. dCt	0.694944
E07	FAM	Slfn8	M WT	9	Spleen	22.2343	21.8126	0.421679	0.352618			Slfn8	dCt	ddCt	Fold Change	Ave. Fold	Std dev	Ttest
E08	FAM	Slfn8			Spleen	22.1268	21.8432	0.283557			F WT	95	0.975714	0.28077	0.823152	1.09132	0.533409
E09	FAM	Slfn8	F WT	11	Spleen	21.4844	21.7748	-0.290376	-0.348046		F WT	97	0.891883	0.196938	0.8724
E10	FAM	Slfn8			Spleen	21.5004	21.9061	-0.405717			F WT	11	-0.348046	-1.04299	2.06049
E11	FAM	Slfn8	F KO	14	Spleen	23.028	23.0132	0.0147998	0.0387505		F WT	16	1.19906	0.504114	0.705093
E12	FAM	Slfn8			Spleen	23.0517	22.989	0.0627013			F WT	26	1.3222	0.627256	0.647407
A01	FAM	Slfn8	F WT	16	Spleen	23.3263	22.2173	1.10901	1.19906		F WT	27	0.818273	0.123329	0.918067
A02	FAM	Slfn8			Spleen	23.252	21.9629	1.28911			F WT	45	0.0055281	-0.689416	1.61263
A03	FAM	Slfn8	M WT	17	Spleen	23.0616	21.7449	1.31667	1.35147		F KO	96	0.633652	-0.0612927	1.0434	1.69	0.448597	0.0343936
A04	FAM	Slfn8			Spleen	23.046	21.6597	1.38627			F KO	3	-0.0756886	-0.770633	1.70602
A07	FAM	Slfn8	M KO	18	Spleen	23.35	22.4298	0.920215	0.848899		F KO	4	0.29407	-0.400875	1.32031
A08	FAM	Slfn8			Spleen	23.3861	22.6085	0.777583			F KO	14	0.0387505	-0.656194	1.57592
A05	FAM	Slfn8	M WT	20	Spleen	23.6864	22.1062	1.58026	1.47495		F KO	28	-0.336792	-1.03174	2.04448
A06	FAM	Slfn8			Spleen	23.6113	22.2417	1.36964			F KO	38	-0.0670282	-0.761973	1.69581
E01	FAM	Slfn8	M KO	24	Spleen	23.4856	22.4457	1.03984	0.762793		F KO	43	0.0141354	-0.680809	1.60304
E02	FAM	Slfn8			Spleen	23.2602	22.7744	0.485745			F KO	59	-0.644798	-1.33974	2.53106
E03	FAM	Slfn8	F WT	26	Spleen	23.5287	22.3604	1.16821	1.3222
E04	FAM	Slfn8			Spleen	23.6771	22.2009	1.47619
E05	FAM	Slfn8	F WT	27	Spleen	23.1434	22.3034	0.839945	0.818273
E06	FAM	Slfn8			Spleen	23.1356	22.339	0.796602
E07	FAM	Slfn8	F KO	28	Spleen	22.0352	22.272	-0.236721	-0.336792
E08	FAM	Slfn8			Spleen	21.9737	22.4106	-0.436863
E09	FAM	Slfn8	M WT	32	Spleen	23.4296	22.6954	0.734235	0.756074
E10	FAM	Slfn8			Spleen	23.48	22.7021	0.777913
E11	FAM	Slfn8	F KO	38	Spleen	22.1269	22.1922	-0.0652626	-0.0670282
E12	FAM	Slfn8			Spleen	22.2108	22.2796	-0.0687938
A07	FAM	Slfn8	M WT	42	Spleen	23.3351	21.114	2.22103	2.25219
A08	FAM	Slfn8			Spleen	23.3867	21.1033	2.28335
A09	FAM	Slfn8	F KO	43	Spleen	22.695	22.6568	0.0382547	0.0141354
A10	FAM	Slfn8			Spleen	22.699	22.709	-0.00998383
A11	FAM	Slfn8	F WT	45	Spleen	22.6	22.6377	-0.0376972	0.0055281
A12	FAM	Slfn8			Spleen	22.7229	22.6741	0.0487534
E07	FAM	Slfn8	M KO	46	Spleen	22.732	23.4692	-0.737144	-1.03798
E08	FAM	Slfn8			Spleen	22.6338	23.9726	-1.33882
E09	FAM	Slfn8	M WT	49	Spleen	22.8339	22.7054	0.12855	0.115739
E10	FAM	Slfn8			Spleen	22.7875	22.6846	0.102929
E11	FAM	Slfn8	F KO	59	Spleen	21.9581	22.6136	-0.655505	-0.644798
E12	FAM	Slfn8			Spleen	22.1017	22.7357	-0.634091
B01	Cy5	Slfn9	F WT	95	Spleen	25.1342	22.0795	3.05467	3.12582			Male	Ave. dCt	3.3581
B02	Cy5	Slfn9			Spleen	25.1039	21.9069	3.19697				Slfn9	dCt	ddCt	Fold Change	Ave. Fold	Std dev	Ttest
B03	Cy5	Slfn9	F KO	96	Spleen	23.9964	21.9814	2.01495	1.97971		M WT	99	2.4498	-0.908297	1.87683	1.19237	0.693441
B04	Cy5	Slfn9			Spleen	23.8855	21.941	1.94447			M WT	7	2.8124	-0.545698	1.45973
B05	Cy5	Slfn9	F WT	97	Spleen	25.0358	22.0778	2.95804	2.96582		M WT	9	2.20534	-1.15276	2.22339
B06	Cy5	Slfn9			Spleen	25.0651	22.0915	2.97359			M WT	17	3.71999	0.361896	0.778141
B07	Cy5	Slfn9	M KO	98	Spleen	24.0525	21.5087	2.5438	2.48223		M WT	20	4.29391	0.935813	0.522748
B08	Cy5	Slfn9			Spleen	24.0868	21.6661	2.42067			M WT	32	3.90646	0.548369	0.683793
B09	Cy5	Slfn9	M WT	99	Spleen	24.532	21.9546	2.57748	2.4498		M WT	42	4.82617	1.46808	0.361464
B10	Cy5	Slfn9			Spleen	24.4512	22.1291	2.32212			M WT	49	2.6507	-0.707399	1.63286
B11	Cy5	Slfn9	F KO	3	Spleen	23.2524	21.9752	1.27714	1.30738		M KO	98	2.48223	-0.875864	1.83511	2.48504	1.31248	0.0453924
B12	Cy5	Slfn9			Spleen	23.2611	21.9235	1.33762			M KO	18	2.55466	-0.803439	1.74526
F01	Cy5	Slfn9	F KO	4	Spleen	23.933	22.116	1.81705	1.91766		M KO	24	2.42559	-0.932504	1.90859
F02	Cy5	Slfn9			Spleen	23.8618	21.8435	2.01827			M KO	46	1.2039	-2.1542	4.45121
F03	Cy5	Slfn9	M WT	7	Spleen	25.2083	22.4394	2.76887	2.8124
F04	Cy5	Slfn9			Spleen	25.2691	22.4131	2.85592				Female	Ave. dCt	3.27928
F07	Cy5	Slfn9	M WT	9	Spleen	23.9856	21.8126	2.17297	2.20534			Slfn9	dCt	ddCt	Fold Change	Ave. Fold	Std dev	Ttest
F08	Cy5	Slfn9			Spleen	24.0809	21.8432	2.2377			F WT	95	3.12582	-0.153461	1.11223	1.22848	0.957458
F09	Cy5	Slfn9	F WT	11	Spleen	23.3909	21.7748	1.61612	1.5719		F WT	97	2.96582	-0.313462	1.24269
F10	Cy5	Slfn9			Spleen	23.4338	21.9061	1.52768			F WT	11	1.5719	-1.70738	3.26568
F11	Cy5	Slfn9	F KO	14	Spleen	24.5287	23.0132	1.51551	1.5116		F WT	16	4.2276	0.948316	0.518237
F12	Cy5	Slfn9			Spleen	24.4967	22.989	1.5077			F WT	26	4.41551	1.13623	0.454946
B01	Cy5	Slfn9	F WT	16	Spleen	26.3501	22.2173	4.13274	4.2276		F WT	27	3.70184	0.422556	0.746102
B02	Cy5	Slfn9			Spleen	26.2853	21.9629	4.32245			F WT	45	2.94648	-0.332798	1.25945
B03	Cy5	Slfn9	M WT	17	Spleen	25.4059	21.7449	3.66099	3.71999		F KO	96	1.97971	-1.29957	2.46155	3.16726	0.586987	0.00034575
B04	Cy5	Slfn9			Spleen	25.4387	21.6597	3.779			F KO	3	1.30738	-1.9719	3.92285
B07	Cy5	Slfn9	M KO	18	Spleen	25.051	22.4298	2.6212	2.55466		F KO	4	1.91766	-1.36162	2.56974
B08	Cy5	Slfn9			Spleen	25.0966	22.6085	2.48812			F KO	14	1.5116	-1.76768	3.40505
B05	Cy5	Slfn9	M WT	20	Spleen	26.4218	22.1062	4.31566	4.29391		F KO	28	1.53882	-1.74046	3.34141
B06	Cy5	Slfn9			Spleen	26.5139	22.2417	4.27216			F KO	38	1.9602	-1.31908	2.49507
F01	Cy5	Slfn9	M KO	24	Spleen	25.0442	22.4457	2.59846	2.42559		F KO	43	1.54575	-1.73353	3.32541
F02	Cy5	Slfn9			Spleen	25.0272	22.7744	2.25272			F KO	59	1.34684	-1.93244	3.81701
F03	Cy5	Slfn9	F WT	26	Spleen	26.6734	22.3604	4.31291	4.41551
F04	Cy5	Slfn9			Spleen	26.719	22.2009	4.51811
F05	Cy5	Slfn9	F WT	27	Spleen	25.989	22.3034	3.68552	3.70184
F06	Cy5	Slfn9			Spleen	26.0571	22.339	3.71816
F07	Cy5	Slfn9	F KO	28	Spleen	23.8592	22.272	1.58728	1.53882
F08	Cy5	Slfn9			Spleen	23.901	22.4106	1.49037
F09	Cy5	Slfn9	M WT	32	Spleen	26.674	22.6954	3.97857	3.90646
F10	Cy5	Slfn9			Spleen	26.5365	22.7021	3.83436
F11	Cy5	Slfn9	F KO	38	Spleen	24.148	22.1922	1.9558	1.9602
F12	Cy5	Slfn9			Spleen	24.2442	22.2796	1.9646
B07	Cy5	Slfn9	M WT	42	Spleen	25.849	21.114	4.73501	4.82617
B08	Cy5	Slfn9			Spleen	26.0207	21.1033	4.91734
B09	Cy5	Slfn9	F KO	43	Spleen	24.1978	22.6568	1.54108	1.54575
B10	Cy5	Slfn9			Spleen	24.2594	22.709	1.55041
B11	Cy5	Slfn9	F WT	45	Spleen	25.611	22.6377	2.97331	2.94648
B12	Cy5	Slfn9			Spleen	25.5938	22.6741	2.91966
F07	Cy5	Slfn9	M KO	46	Spleen	24.8403	23.4692	1.37118	1.2039
F08	Cy5	Slfn9			Spleen	25.0092	23.9726	1.03662
F09	Cy5	Slfn9	M WT	49	Spleen	25.3635	22.7054	2.65812	2.6507
F10	Cy5	Slfn9			Spleen	25.3278	22.6846	2.64327
F11	Cy5	Slfn9	F KO	59	Spleen	23.9576	22.6136	1.34394	1.34684
F12	Cy5	Slfn9			Spleen	24.0855	22.7357	1.34973
B01	HEX	RPLP0			Spleen	22.0795
B02	HEX	RPLP0			Spleen	21.9069
B03	HEX	RPLP0			Spleen	21.9814
B04	HEX	RPLP0			Spleen	21.941
B05	HEX	RPLP0			Spleen	22.0778
B06	HEX	RPLP0			Spleen	22.0915
B07	HEX	RPLP0			Spleen	21.5087
B08	HEX	RPLP0			Spleen	21.6661
B09	HEX	RPLP0			Spleen	21.9546
B10	HEX	RPLP0			Spleen	22.1291
B11	HEX	RPLP0			Spleen	21.9752
B12	HEX	RPLP0			Spleen	21.9235
C01	HEX	RPLP0			Spleen	22.1693
C02	HEX	RPLP0			Spleen	21.9665
C03	HEX	RPLP0			Spleen	21.8739
C04	HEX	RPLP0			Spleen	21.8978
C05	HEX	RPLP0			Spleen	22.3295
C06	HEX	RPLP0			Spleen	22.022
C07	HEX	RPLP0			Spleen	21.531
C08	HEX	RPLP0			Spleen	21.6566
C09	HEX	RPLP0			Spleen	22.4226
C10	HEX	RPLP0			Spleen	22.0923
C11	HEX	RPLP0			Spleen	22.194
C12	HEX	RPLP0			Spleen	22.1026
D01	HEX	RPLP0			Spleen	22.0745
D02	HEX	RPLP0			Spleen	21.9956
D03	HEX	RPLP0			Spleen	22.0874
D04	HEX	RPLP0			Spleen	22.07
D05	HEX	RPLP0			Spleen	22.4378
D06	HEX	RPLP0			Spleen	22.1863
D07	HEX	RPLP0			Spleen	21.589
D08	HEX	RPLP0			Spleen	21.6601
D09	HEX	RPLP0			Spleen	22.1801
D10	HEX	RPLP0			Spleen	22.2126
D11	HEX	RPLP0			Spleen	22.0995
D12	HEX	RPLP0			Spleen	22.1854
F01	HEX	RPLP0			Spleen	22.116
F02	HEX	RPLP0			Spleen	21.8435
F03	HEX	RPLP0			Spleen	22.4394
F04	HEX	RPLP0			Spleen	22.4131
F05	HEX	RPLP0			Spleen	22.2846
F06	HEX	RPLP0			Spleen	22.2566
F07	HEX	RPLP0			Spleen	21.8126
F08	HEX	RPLP0			Spleen	21.8432
F09	HEX	RPLP0			Spleen	21.7748
F10	HEX	RPLP0			Spleen	21.9061
F11	HEX	RPLP0			Spleen	23.0132
F12	HEX	RPLP0			Spleen	22.989
G01	HEX	RPLP0			Spleen	22.0551
G02	HEX	RPLP0			Spleen	21.9895
G03	HEX	RPLP0			Spleen	22.821
G04	HEX	RPLP0			Spleen	22.9878
G05	HEX	RPLP0			Spleen	22.7129
G06	HEX	RPLP0			Spleen	22.4149
G07	HEX	RPLP0			Spleen	22.1459
G08	HEX	RPLP0			Spleen	22.227
G09	HEX	RPLP0			Spleen	21.9357
G10	HEX	RPLP0			Spleen	22.1381
G11	HEX	RPLP0			Spleen	23.33
G12	HEX	RPLP0			Spleen	23.5505
H01	HEX	RPLP0			Spleen	22.3139
H02	HEX	RPLP0			Spleen	22.1957
H03	HEX	RPLP0			Spleen	22.9157
H04	HEX	RPLP0			Spleen	23.0284
H05	HEX	RPLP0			Spleen	23.0153
H06	HEX	RPLP0			Spleen	22.9383
H07	HEX	RPLP0			Spleen	22.2782
H08	HEX	RPLP0			Spleen	22.391
H09	HEX	RPLP0			Spleen	22.3897
H10	HEX	RPLP0			Spleen	22.2775
H11	HEX	RPLP0			Spleen	23.4057
H12	HEX	RPLP0			Spleen	23.5993
