# Supplementary material for: Loss of Schlafen3 influences the expression levels of Schlafen family members in ileum, thymus, and spleen tissue
Source: PeerJ. 2020 Jan 28;8:e8461. doi: 10.7717/peerj.8461 (PMC6993753; doi:10.7717/peerj.8461)
Supplement: Supplemental Information 15 [file peerj-08-8461-s015.xlsx]

## Sheet: 20190313_TSI SLFN FAM P8
File Name	20190313_TSI SLFN FAM P8.pcrd
Created By User
Notes
ID
Run Started	03/13/2019 15:42:13 UTC
Run Ended	03/13/2019 16:55:01 UTC
Sample Vol	20
Lid Temp	105
Protocol File Name	Unknown.prcl
Plate Setup File Name	DefaultPlate.pltd
Base Serial Number	CT031118
Optical Head Serial Number	785BR9482
CFX Manager Version	3.1.1517.0823.
Well group	All Wells
Amplification step	3
Melt step
Well	Fluor	Target	Sex Genotype	Content	Sample	Cq	Starting Quantity (SQ)
B01	HEX	RPLP0			IM	23.9182
B02	HEX	RPLP0			IM	23.7419
B03	HEX	RPLP0			IM	23.8902
B04	HEX	RPLP0			IM	23.8144
B05	HEX	RPLP0			IM	23.5243
B06	HEX	RPLP0			IM	23.7548
C01	HEX	RPLP0			IM	24.043
C02	HEX	RPLP0			IM	23.6719
C03	HEX	RPLP0			IM	23.7959
C04	HEX	RPLP0			IM	23.6171
C05	HEX	RPLP0			IM	23.5095
C06	HEX	RPLP0			IM	23.5779
D01	HEX	RPLP0			IM	24.0102
D02	HEX	RPLP0			IM	23.7996
D03	HEX	RPLP0			IM	23.7158
D04	HEX	RPLP0			IM	23.8052
D05	HEX	RPLP0			IM	23.907
D06	HEX	RPLP0			IM	23.7409
F01	HEX	RPLP0			IM	24.1351
F02	HEX	RPLP0			IM	23.8298
F03	HEX	RPLP0			IM	23.6233
F04	HEX	RPLP0			IM	23.5491
F05	HEX	RPLP0			IM	23.8709
F06	HEX	RPLP0			IM	24.0513
G01	HEX	RPLP0			IM	24.0782
G02	HEX	RPLP0			IM	24.1193
G03	HEX	RPLP0			IM	24.0195
G04	HEX	RPLP0			IM	23.7654
G05	HEX	RPLP0			IM	24.0397
G06	HEX	RPLP0			IM	24.1542
H01	HEX	RPLP0			IM	24.2852
H02	HEX	RPLP0			IM	24.3575
H03	HEX	RPLP0			IM	24.2024
H04	HEX	RPLP0			IM	24.2825
H05	HEX	RPLP0			IM	24.3704
H06	HEX	RPLP0			IM	24.4084
B01	FAM	Slfn1	M WT	42	IM	27.736	23.9182
B02	FAM	Slfn1			IM	27.8434	23.7419
B03	FAM	Slfn1	F KO	43	IM	27.6727	23.8902
B04	FAM	Slfn1			IM	27.6322	23.8144
B05	FAM	Slfn1	F WT	45	IM	28.1636	23.5243
B06	FAM	Slfn1			IM	28.1496	23.7548
F01	FAM	Slfn1	M KO	46	IM	28.6137	24.1351
F02	FAM	Slfn1			IM	28.3771	23.8298
F03	FAM	Slfn1	M WT	49	IM	27.9729	23.6233
F04	FAM	Slfn1			IM	27.8152	23.5491
F05	FAM	Slfn1	F KO	59	IM	27.4583	23.8709
F06	FAM	Slfn1			IM	27.5627	24.0513
A01	HEX	Slfn2	M WT	42	IM	23.0204	23.9182
A02	HEX	Slfn2			IM	23.0886	23.7419
A03	HEX	Slfn2	F KO	43	IM	23.283	23.8902
A04	HEX	Slfn2			IM	23.3548	23.8144
A05	HEX	Slfn2	F WT	45	IM	23.1376	23.5243
A06	HEX	Slfn2			IM	23.0296	23.7548
E01	HEX	Slfn2	M KO	46	IM	24.6232	24.1351
E02	HEX	Slfn2			IM	24.4378	23.8298
E03	HEX	Slfn2	M WT	49	IM	23.4384	23.6233
E04	HEX	Slfn2			IM	23.5225	23.5491
E05	HEX	Slfn2	F KO	59	IM	23.2741	23.8709
E06	HEX	Slfn2			IM	23.4117	24.0513
C01	FAM	Slfn3	M WT	42	IM	28.3294	24.043
C02	FAM	Slfn3			IM	28.3642	23.6719
C03	FAM	Slfn3	F KO	43	IM	40.6148	23.7959
C04	FAM	Slfn3			IM	48.6414	23.6171
C05	FAM	Slfn3	F WT	45	IM	28.2884	23.5095
C06	FAM	Slfn3			IM	28.4324	23.5779
G01	FAM	Slfn3	M KO	46	IM	37.1622	24.0782
G02	FAM	Slfn3			IM	39.9871	24.1193
G03	FAM	Slfn3	M WT	49	IM	29.8057	24.0195
G04	FAM	Slfn3			IM	29.7728	23.7654
G05	FAM	Slfn3	F KO	59	IM	39.5991	24.0397
G06	FAM	Slfn3			IM	41.0748	24.1542
D01	Cy5	Slfn4	M WT	42	IM	25.0268	24.0102
D02	Cy5	Slfn4			IM	24.9171	23.7996
D03	Cy5	Slfn4	F KO	43	IM	24.2323	23.7158
D04	Cy5	Slfn4			IM	24.355	23.8052
D05	Cy5	Slfn4	F WT	45	IM	24.3381	23.907
D06	Cy5	Slfn4			IM	24.2735	23.7409
H01	Cy5	Slfn4	M KO	46	IM	25.2388	24.2852
H02	Cy5	Slfn4			IM	25.0809	24.3575
H03	Cy5	Slfn4	M WT	49	IM	23.828	24.2024
H04	Cy5	Slfn4			IM	23.8996	24.2825
H05	Cy5	Slfn4	F KO	59	IM	24.5312	24.3704
H06	Cy5	Slfn4			IM	24.5312	24.4084
A01	Cy5	Slfn5	M WT	42	IM	27.8478	23.9182
A02	Cy5	Slfn5			IM	27.8807	23.7419
A03	Cy5	Slfn5	F KO	43	IM	26.6291	23.8902
A04	Cy5	Slfn5			IM	26.7781	23.8144
A05	Cy5	Slfn5	F WT	45	IM	27.3516	23.5243
A06	Cy5	Slfn5			IM	27.2307	23.7548
E01	Cy5	Slfn5	M KO	46	IM	28.3261	24.1351
E02	Cy5	Slfn5			IM	28.0853	23.8298
E03	Cy5	Slfn5	M WT	49	IM	27.2648	23.6233
E04	Cy5	Slfn5			IM	27.3376	23.5491
E05	Cy5	Slfn5	F KO	59	IM	26.2964	23.8709
E06	Cy5	Slfn5			IM	26.2666	24.0513
A01	FAM	Slfn8	M WT	42	IM	25.4024	23.9182
A02	FAM	Slfn8			IM	25.3873	23.7419
A03	FAM	Slfn8	F KO	43	IM	24.2847	23.8902
A04	FAM	Slfn8			IM	24.2853	23.8144
A05	FAM	Slfn8	F WT	45	IM	24.4683	23.5243
A06	FAM	Slfn8			IM	24.5052	23.7548
E01	FAM	Slfn8	M KO	46	IM	25.3448	24.1351
E02	FAM	Slfn8			IM	25.1312	23.8298
E03	FAM	Slfn8	M WT	49	IM	24.6885	23.6233
E04	FAM	Slfn8			IM	24.7858	23.5491
E05	FAM	Slfn8	F KO	59	IM	24.8694	23.8709
E06	FAM	Slfn8			IM	24.9527	24.0513
B01	Cy5	Slfn9	M WT	42	IM	26.5418	23.9182
B02	Cy5	Slfn9			IM	26.5082	23.7419
B03	Cy5	Slfn9	F KO	43	IM	25.6613	23.8902
B04	Cy5	Slfn9			IM	25.5855	23.8144
B05	Cy5	Slfn9	F WT	45	IM	25.2304	23.5243
B06	Cy5	Slfn9			IM	25.1981	23.7548
F01	Cy5	Slfn9	M KO	46	IM	26.2625	24.1351
F02	Cy5	Slfn9			IM	26.2632	23.8298
F03	Cy5	Slfn9	M WT	49	IM	25.7613	23.6233
F04	Cy5	Slfn9			IM	25.6899	23.5491
F05	Cy5	Slfn9	F KO	59	IM	26.0558	23.8709
F06	Cy5	Slfn9			IM	26.01	24.0513
