# Supplementary material for: Loss of Schlafen3 influences the expression levels of Schlafen family members in ileum, thymus, and spleen tissue
Source: PeerJ. 2020 Jan 28;8:e8461. doi: 10.7717/peerj.8461 (PMC6993753; doi:10.7717/peerj.8461)
Supplement: Supplemental Information 16 [file peerj-08-8461-s016.xlsx]

Archive with 7 entries (7 files):
- [content_types].xml
- xl/workbook.xml
- xl/sharedstrings.xml
- xl/_rels/workbook.xml.rels
- xl/styles.xml
- xl/worksheets/sheet1.xml
- _rels/.rels
