# Supplementary material for: Loss of Schlafen3 influences the expression levels of Schlafen family members in ileum, thymus, and spleen tissue
Source: PeerJ. 2020 Jan 28;8:e8461. doi: 10.7717/peerj.8461 (PMC6993753; doi:10.7717/peerj.8461)
Supplement: Supplemental Information 16 [file peerj-08-8461-s016.xlsx › [content_types].xml]

<?xml version="1.0"?>
<Types xmlns:xsi="http://www.w3.org/2001/XMLSchema-instance" xmlns:xsd="http://www.w3.org/2001/XMLSchema" xmlns="http://schemas.openxmlformats.org/package/2006/content-types">
  <Default Extension="bin" ContentType="application/vnd.openxmlformats-officedocument.spreadsheetml.printerSettings" />
  <Default Extension="rels" ContentType="application/vnd.openxmlformats-package.relationships+xml" />
  <Default Extension="xml" ContentType="application/xml" />
  <Override ContentType="application/vnd.openxmlformats-officedocument.spreadsheetml.sheet.main+xml" PartName="/xl/workbook.xml" />
  <Override ContentType="application/vnd.openxmlformats-officedocument.spreadsheetml.worksheet+xml" PartName="/xl/worksheets/sheet1.xml" />
  <Override ContentType="application/vnd.openxmlformats-officedocument.spreadsheetml.styles+xml" PartName="/xl/styles.xml" />
  <Override ContentType="application/vnd.openxmlformats-officedocument.spreadsheetml.sharedStrings+xml" PartName="/xl/sharedStrings.xml" />
</Types>
