# Supplementary material for: Loss of Schlafen3 influences the expression levels of Schlafen family members in ileum, thymus, and spleen tissue
Source: PeerJ. 2020 Jan 28;8:e8461. doi: 10.7717/peerj.8461 (PMC6993753; doi:10.7717/peerj.8461)
Supplement: Supplemental Information 16 [file peerj-08-8461-s016.xlsx › xl/_rels/workbook.xml.rels]

<?xml version="1.0"?>
<Relationships xmlns:xsi="http://www.w3.org/2001/XMLSchema-instance" xmlns:xsd="http://www.w3.org/2001/XMLSchema" xmlns="http://schemas.openxmlformats.org/package/2006/relationships">
  <Relationship Target="/xl/worksheets/sheet1.xml" Type="http://schemas.openxmlformats.org/officeDocument/2006/relationships/worksheet" Id="rId1" />
  <Relationship Target="/xl/styles.xml" Type="http://schemas.openxmlformats.org/officeDocument/2006/relationships/styles" Id="rId2" />
  <Relationship Target="/xl/sharedStrings.xml" Type="http://schemas.openxmlformats.org/officeDocument/2006/relationships/sharedStrings" Id="rId3" />
</Relationships>
