# Supplementary material for: Loss of Schlafen3 influences the expression levels of Schlafen family members in ileum, thymus, and spleen tissue
Source: PeerJ. 2020 Jan 28;8:e8461. doi: 10.7717/peerj.8461 (PMC6993753; doi:10.7717/peerj.8461)
Supplement: Supplemental Information 16 [file peerj-08-8461-s016.xlsx › xl/workbook.xml]

<?xml version="1.0"?>
<workbook xmlns:xsi="http://www.w3.org/2001/XMLSchema-instance" xmlns:xsd="http://www.w3.org/2001/XMLSchema" xmlns="http://schemas.openxmlformats.org/spreadsheetml/2006/main">
  <bookViews>
    <workbookView tabRatio="500" />
  </bookViews>
  <sheets>
    <sheet name="20190312_TSI SLFN FAM P6" sheetId="1" d3p1:id="rId1" xmlns:d3p1="http://schemas.openxmlformats.org/officeDocument/2006/relationships" />
  </sheets>
  <calcPr iterateCount="1" />
</workbook>
