# Supplementary material for: Loss of Schlafen3 influences the expression levels of Schlafen family members in ileum, thymus, and spleen tissue
Source: PeerJ. 2020 Jan 28;8:e8461. doi: 10.7717/peerj.8461 (PMC6993753; doi:10.7717/peerj.8461)
Supplement: Supplemental Information 16 [file peerj-08-8461-s016.xlsx › xl/worksheets/sheet1.xml]

<?xml version="1.0"?>
<worksheet xmlns:xsi="http://www.w3.org/2001/XMLSchema-instance" xmlns:xsd="http://www.w3.org/2001/XMLSchema" xmlns="http://schemas.openxmlformats.org/spreadsheetml/2006/main">
  <sheetPr>
    <pageSetUpPr />
  </sheetPr>
  <dimension ref="A1:G260" />
  <sheetViews>
    <sheetView tabSelected="true" workbookViewId="0">
      <selection activeCell="A1" sqref="A1:A1" />
    </sheetView>
  </sheetViews>
  <sheetFormatPr defaultColWidth="10" defaultRowHeight="15" customHeight="true" />
  <cols>
    <col min="1" max="1" width="10" style="3" customWidth="true" />
    <col min="2" max="2" width="10" style="4" customWidth="true" />
    <col min="3" max="3" width="13.33" style="7" customWidth="true" />
    <col min="4" max="4" width="11.67" style="7" customWidth="true" />
    <col min="5" max="5" width="15" style="7" customWidth="true" />
    <col min="6" max="6" width="15" style="8" customWidth="true" />
    <col min="7" max="7" width="18.33" style="9" customWidth="true" />
    <col min="8" max="16384" width="10" style="1" customWidth="true" />
  </cols>
  <sheetData>
    <row r="1" spans="1:2" ht="15" customHeight="true">
      <c r="A1" s="3" t="s">
        <v>0</v>
      </c>
      <c r="B1" s="4" t="s">
        <v>1</v>
      </c>
    </row>
    <row r="2" spans="1:1" ht="15" customHeight="true">
      <c r="A2" s="3" t="s">
        <v>2</v>
      </c>
    </row>
    <row r="3" spans="1:1" ht="15" customHeight="true">
      <c r="A3" s="3" t="s">
        <v>3</v>
      </c>
    </row>
    <row r="4" spans="1:1" ht="15" customHeight="true">
      <c r="A4" s="3" t="s">
        <v>4</v>
      </c>
    </row>
    <row r="5" spans="1:2" ht="15" customHeight="true">
      <c r="A5" s="3" t="s">
        <v>5</v>
      </c>
      <c r="B5" s="4" t="s">
        <v>6</v>
      </c>
    </row>
    <row r="6" spans="1:2" ht="15" customHeight="true">
      <c r="A6" s="3" t="s">
        <v>7</v>
      </c>
      <c r="B6" s="4" t="s">
        <v>8</v>
      </c>
    </row>
    <row r="7" spans="1:2" ht="15" customHeight="true">
      <c r="A7" s="3" t="s">
        <v>9</v>
      </c>
      <c r="B7" s="5">
        <v>20</v>
      </c>
    </row>
    <row r="8" spans="1:2" ht="15" customHeight="true">
      <c r="A8" s="3" t="s">
        <v>10</v>
      </c>
      <c r="B8" s="5">
        <v>105</v>
      </c>
    </row>
    <row r="9" spans="1:2" ht="15" customHeight="true">
      <c r="A9" s="3" t="s">
        <v>11</v>
      </c>
      <c r="B9" s="4" t="s">
        <v>12</v>
      </c>
    </row>
    <row r="10" spans="1:2" ht="15" customHeight="true">
      <c r="A10" s="3" t="s">
        <v>13</v>
      </c>
      <c r="B10" s="4" t="s">
        <v>14</v>
      </c>
    </row>
    <row r="11" spans="1:2" ht="15" customHeight="true">
      <c r="A11" s="3" t="s">
        <v>15</v>
      </c>
      <c r="B11" s="4" t="s">
        <v>16</v>
      </c>
    </row>
    <row r="12" spans="1:2" ht="15" customHeight="true">
      <c r="A12" s="3" t="s">
        <v>17</v>
      </c>
      <c r="B12" s="4" t="s">
        <v>18</v>
      </c>
    </row>
    <row r="13" spans="1:2" ht="15" customHeight="true">
      <c r="A13" s="3" t="s">
        <v>19</v>
      </c>
      <c r="B13" s="4" t="s">
        <v>20</v>
      </c>
    </row>
    <row r="15" spans="1:2" ht="15" customHeight="true">
      <c r="A15" s="3" t="s">
        <v>21</v>
      </c>
      <c r="B15" s="4" t="s">
        <v>22</v>
      </c>
    </row>
    <row r="16" spans="1:2" ht="15" customHeight="true">
      <c r="A16" s="3" t="s">
        <v>23</v>
      </c>
      <c r="B16" s="6">
        <v>3</v>
      </c>
    </row>
    <row r="17" spans="1:1" ht="15" customHeight="true">
      <c r="A17" s="3" t="s">
        <v>24</v>
      </c>
    </row>
    <row r="20" spans="1:7" ht="15" customHeight="true">
      <c r="A20" s="7" t="s">
        <v>25</v>
      </c>
      <c r="B20" s="7" t="s">
        <v>26</v>
      </c>
      <c r="C20" s="7" t="s">
        <v>27</v>
      </c>
      <c r="D20" s="7" t="s">
        <v>28</v>
      </c>
      <c r="E20" s="7" t="s">
        <v>29</v>
      </c>
      <c r="F20" s="7" t="s">
        <v>30</v>
      </c>
      <c r="G20" s="7" t="s">
        <v>31</v>
      </c>
    </row>
    <row r="21" spans="1:7" ht="15" customHeight="true">
      <c r="A21" s="3" t="s">
        <v>32</v>
      </c>
      <c r="B21" s="4" t="s">
        <v>33</v>
      </c>
      <c r="C21" s="7" t="s">
        <v>34</v>
      </c>
      <c r="D21" s="7" t="s">
        <v>35</v>
      </c>
      <c r="E21" s="7" t="s">
        <v>36</v>
      </c>
      <c r="F21" s="8">
        <v>27.0467216478831</v>
      </c>
      <c r="G21" s="9" />
    </row>
    <row r="22" spans="1:7" ht="15" customHeight="true">
      <c r="A22" s="3" t="s">
        <v>37</v>
      </c>
      <c r="B22" s="4" t="s">
        <v>33</v>
      </c>
      <c r="C22" s="7" t="s">
        <v>34</v>
      </c>
      <c r="D22" s="7" t="s">
        <v>35</v>
      </c>
      <c r="E22" s="7" t="s">
        <v>36</v>
      </c>
      <c r="F22" s="8">
        <v>27.0815467529369</v>
      </c>
      <c r="G22" s="9" />
    </row>
    <row r="23" spans="1:7" ht="15" customHeight="true">
      <c r="A23" s="3" t="s">
        <v>38</v>
      </c>
      <c r="B23" s="4" t="s">
        <v>33</v>
      </c>
      <c r="C23" s="7" t="s">
        <v>34</v>
      </c>
      <c r="D23" s="7" t="s">
        <v>35</v>
      </c>
      <c r="E23" s="7" t="s">
        <v>36</v>
      </c>
      <c r="F23" s="8">
        <v>26.5962860432909</v>
      </c>
      <c r="G23" s="9" />
    </row>
    <row r="24" spans="1:7" ht="15" customHeight="true">
      <c r="A24" s="3" t="s">
        <v>39</v>
      </c>
      <c r="B24" s="4" t="s">
        <v>33</v>
      </c>
      <c r="C24" s="7" t="s">
        <v>34</v>
      </c>
      <c r="D24" s="7" t="s">
        <v>35</v>
      </c>
      <c r="E24" s="7" t="s">
        <v>36</v>
      </c>
      <c r="F24" s="8">
        <v>26.5263137509666</v>
      </c>
      <c r="G24" s="9" />
    </row>
    <row r="25" spans="1:7" ht="15" customHeight="true">
      <c r="A25" s="3" t="s">
        <v>40</v>
      </c>
      <c r="B25" s="4" t="s">
        <v>33</v>
      </c>
      <c r="C25" s="7" t="s">
        <v>34</v>
      </c>
      <c r="D25" s="7" t="s">
        <v>35</v>
      </c>
      <c r="E25" s="7" t="s">
        <v>36</v>
      </c>
      <c r="F25" s="8">
        <v>27.1483068495503</v>
      </c>
      <c r="G25" s="9" />
    </row>
    <row r="26" spans="1:7" ht="15" customHeight="true">
      <c r="A26" s="3" t="s">
        <v>41</v>
      </c>
      <c r="B26" s="4" t="s">
        <v>33</v>
      </c>
      <c r="C26" s="7" t="s">
        <v>34</v>
      </c>
      <c r="D26" s="7" t="s">
        <v>35</v>
      </c>
      <c r="E26" s="7" t="s">
        <v>36</v>
      </c>
      <c r="F26" s="8">
        <v>27.0400941322131</v>
      </c>
      <c r="G26" s="9" />
    </row>
    <row r="27" spans="1:7" ht="15" customHeight="true">
      <c r="A27" s="3" t="s">
        <v>42</v>
      </c>
      <c r="B27" s="4" t="s">
        <v>33</v>
      </c>
      <c r="C27" s="7" t="s">
        <v>34</v>
      </c>
      <c r="D27" s="7" t="s">
        <v>35</v>
      </c>
      <c r="E27" s="7" t="s">
        <v>36</v>
      </c>
      <c r="F27" s="8">
        <v>25.8395993693133</v>
      </c>
      <c r="G27" s="9" />
    </row>
    <row r="28" spans="1:7" ht="15" customHeight="true">
      <c r="A28" s="3" t="s">
        <v>43</v>
      </c>
      <c r="B28" s="4" t="s">
        <v>33</v>
      </c>
      <c r="C28" s="7" t="s">
        <v>34</v>
      </c>
      <c r="D28" s="7" t="s">
        <v>35</v>
      </c>
      <c r="E28" s="7" t="s">
        <v>36</v>
      </c>
      <c r="F28" s="8">
        <v>25.8949970417431</v>
      </c>
      <c r="G28" s="9" />
    </row>
    <row r="29" spans="1:7" ht="15" customHeight="true">
      <c r="A29" s="3" t="s">
        <v>44</v>
      </c>
      <c r="B29" s="4" t="s">
        <v>33</v>
      </c>
      <c r="C29" s="7" t="s">
        <v>34</v>
      </c>
      <c r="D29" s="7" t="s">
        <v>35</v>
      </c>
      <c r="E29" s="7" t="s">
        <v>36</v>
      </c>
      <c r="F29" s="8">
        <v>28.8060831129914</v>
      </c>
      <c r="G29" s="9" />
    </row>
    <row r="30" spans="1:7" ht="15" customHeight="true">
      <c r="A30" s="3" t="s">
        <v>45</v>
      </c>
      <c r="B30" s="4" t="s">
        <v>33</v>
      </c>
      <c r="C30" s="7" t="s">
        <v>34</v>
      </c>
      <c r="D30" s="7" t="s">
        <v>35</v>
      </c>
      <c r="E30" s="7" t="s">
        <v>36</v>
      </c>
      <c r="F30" s="8">
        <v>28.7801395013945</v>
      </c>
      <c r="G30" s="9" />
    </row>
    <row r="31" spans="1:7" ht="15" customHeight="true">
      <c r="A31" s="3" t="s">
        <v>46</v>
      </c>
      <c r="B31" s="4" t="s">
        <v>33</v>
      </c>
      <c r="C31" s="7" t="s">
        <v>34</v>
      </c>
      <c r="D31" s="7" t="s">
        <v>35</v>
      </c>
      <c r="E31" s="7" t="s">
        <v>36</v>
      </c>
      <c r="F31" s="8">
        <v>27.7263959179778</v>
      </c>
      <c r="G31" s="9" />
    </row>
    <row r="32" spans="1:7" ht="15" customHeight="true">
      <c r="A32" s="3" t="s">
        <v>47</v>
      </c>
      <c r="B32" s="4" t="s">
        <v>33</v>
      </c>
      <c r="C32" s="7" t="s">
        <v>34</v>
      </c>
      <c r="D32" s="7" t="s">
        <v>35</v>
      </c>
      <c r="E32" s="7" t="s">
        <v>36</v>
      </c>
      <c r="F32" s="8">
        <v>27.6678436684362</v>
      </c>
      <c r="G32" s="9" />
    </row>
    <row r="33" spans="1:7" ht="15" customHeight="true">
      <c r="A33" s="3" t="s">
        <v>48</v>
      </c>
      <c r="B33" s="4" t="s">
        <v>33</v>
      </c>
      <c r="C33" s="7" t="s">
        <v>49</v>
      </c>
      <c r="D33" s="7" t="s">
        <v>35</v>
      </c>
      <c r="E33" s="7" t="s">
        <v>36</v>
      </c>
      <c r="F33" s="8">
        <v>24.4810131641012</v>
      </c>
      <c r="G33" s="9" />
    </row>
    <row r="34" spans="1:7" ht="15" customHeight="true">
      <c r="A34" s="3" t="s">
        <v>50</v>
      </c>
      <c r="B34" s="4" t="s">
        <v>33</v>
      </c>
      <c r="C34" s="7" t="s">
        <v>49</v>
      </c>
      <c r="D34" s="7" t="s">
        <v>35</v>
      </c>
      <c r="E34" s="7" t="s">
        <v>36</v>
      </c>
      <c r="F34" s="8">
        <v>24.4726389989695</v>
      </c>
      <c r="G34" s="9" />
    </row>
    <row r="35" spans="1:7" ht="15" customHeight="true">
      <c r="A35" s="3" t="s">
        <v>51</v>
      </c>
      <c r="B35" s="4" t="s">
        <v>33</v>
      </c>
      <c r="C35" s="7" t="s">
        <v>49</v>
      </c>
      <c r="D35" s="7" t="s">
        <v>35</v>
      </c>
      <c r="E35" s="7" t="s">
        <v>36</v>
      </c>
      <c r="F35" s="8">
        <v>26.1716727802679</v>
      </c>
      <c r="G35" s="9" />
    </row>
    <row r="36" spans="1:7" ht="15" customHeight="true">
      <c r="A36" s="3" t="s">
        <v>52</v>
      </c>
      <c r="B36" s="4" t="s">
        <v>33</v>
      </c>
      <c r="C36" s="7" t="s">
        <v>49</v>
      </c>
      <c r="D36" s="7" t="s">
        <v>35</v>
      </c>
      <c r="E36" s="7" t="s">
        <v>36</v>
      </c>
      <c r="F36" s="8">
        <v>26.1503158372907</v>
      </c>
      <c r="G36" s="9" />
    </row>
    <row r="37" spans="1:7" ht="15" customHeight="true">
      <c r="A37" s="3" t="s">
        <v>53</v>
      </c>
      <c r="B37" s="4" t="s">
        <v>33</v>
      </c>
      <c r="C37" s="7" t="s">
        <v>49</v>
      </c>
      <c r="D37" s="7" t="s">
        <v>35</v>
      </c>
      <c r="E37" s="7" t="s">
        <v>36</v>
      </c>
      <c r="F37" s="8">
        <v>24.9093641765216</v>
      </c>
      <c r="G37" s="9" />
    </row>
    <row r="38" spans="1:7" ht="15" customHeight="true">
      <c r="A38" s="3" t="s">
        <v>54</v>
      </c>
      <c r="B38" s="4" t="s">
        <v>33</v>
      </c>
      <c r="C38" s="7" t="s">
        <v>49</v>
      </c>
      <c r="D38" s="7" t="s">
        <v>35</v>
      </c>
      <c r="E38" s="7" t="s">
        <v>36</v>
      </c>
      <c r="F38" s="8">
        <v>25.0207681396472</v>
      </c>
      <c r="G38" s="9" />
    </row>
    <row r="39" spans="1:7" ht="15" customHeight="true">
      <c r="A39" s="3" t="s">
        <v>55</v>
      </c>
      <c r="B39" s="4" t="s">
        <v>33</v>
      </c>
      <c r="C39" s="7" t="s">
        <v>49</v>
      </c>
      <c r="D39" s="7" t="s">
        <v>35</v>
      </c>
      <c r="E39" s="7" t="s">
        <v>36</v>
      </c>
      <c r="F39" s="8">
        <v>25.366746633786</v>
      </c>
      <c r="G39" s="9" />
    </row>
    <row r="40" spans="1:7" ht="15" customHeight="true">
      <c r="A40" s="3" t="s">
        <v>56</v>
      </c>
      <c r="B40" s="4" t="s">
        <v>33</v>
      </c>
      <c r="C40" s="7" t="s">
        <v>49</v>
      </c>
      <c r="D40" s="7" t="s">
        <v>35</v>
      </c>
      <c r="E40" s="7" t="s">
        <v>36</v>
      </c>
      <c r="F40" s="8">
        <v>25.4127278119548</v>
      </c>
      <c r="G40" s="9" />
    </row>
    <row r="41" spans="1:7" ht="15" customHeight="true">
      <c r="A41" s="3" t="s">
        <v>57</v>
      </c>
      <c r="B41" s="4" t="s">
        <v>33</v>
      </c>
      <c r="C41" s="7" t="s">
        <v>49</v>
      </c>
      <c r="D41" s="7" t="s">
        <v>35</v>
      </c>
      <c r="E41" s="7" t="s">
        <v>36</v>
      </c>
      <c r="F41" s="8">
        <v>26.9404787034959</v>
      </c>
      <c r="G41" s="9" />
    </row>
    <row r="42" spans="1:7" ht="15" customHeight="true">
      <c r="A42" s="3" t="s">
        <v>58</v>
      </c>
      <c r="B42" s="4" t="s">
        <v>33</v>
      </c>
      <c r="C42" s="7" t="s">
        <v>49</v>
      </c>
      <c r="D42" s="7" t="s">
        <v>35</v>
      </c>
      <c r="E42" s="7" t="s">
        <v>36</v>
      </c>
      <c r="F42" s="8">
        <v>26.9522778746406</v>
      </c>
      <c r="G42" s="9" />
    </row>
    <row r="43" spans="1:7" ht="15" customHeight="true">
      <c r="A43" s="3" t="s">
        <v>59</v>
      </c>
      <c r="B43" s="4" t="s">
        <v>33</v>
      </c>
      <c r="C43" s="7" t="s">
        <v>49</v>
      </c>
      <c r="D43" s="7" t="s">
        <v>35</v>
      </c>
      <c r="E43" s="7" t="s">
        <v>36</v>
      </c>
      <c r="F43" s="8">
        <v>25.4552656789673</v>
      </c>
      <c r="G43" s="9" />
    </row>
    <row r="44" spans="1:7" ht="15" customHeight="true">
      <c r="A44" s="3" t="s">
        <v>60</v>
      </c>
      <c r="B44" s="4" t="s">
        <v>33</v>
      </c>
      <c r="C44" s="7" t="s">
        <v>49</v>
      </c>
      <c r="D44" s="7" t="s">
        <v>35</v>
      </c>
      <c r="E44" s="7" t="s">
        <v>36</v>
      </c>
      <c r="F44" s="8">
        <v>25.6321432173484</v>
      </c>
      <c r="G44" s="9" />
    </row>
    <row r="45" spans="1:7" ht="15" customHeight="true">
      <c r="A45" s="3" t="s">
        <v>61</v>
      </c>
      <c r="B45" s="4" t="s">
        <v>33</v>
      </c>
      <c r="C45" s="7" t="s">
        <v>62</v>
      </c>
      <c r="D45" s="7" t="s">
        <v>35</v>
      </c>
      <c r="E45" s="7" t="s">
        <v>36</v>
      </c>
      <c r="F45" s="8">
        <v>24.4531916880997</v>
      </c>
      <c r="G45" s="9" />
    </row>
    <row r="46" spans="1:7" ht="15" customHeight="true">
      <c r="A46" s="3" t="s">
        <v>63</v>
      </c>
      <c r="B46" s="4" t="s">
        <v>33</v>
      </c>
      <c r="C46" s="7" t="s">
        <v>62</v>
      </c>
      <c r="D46" s="7" t="s">
        <v>35</v>
      </c>
      <c r="E46" s="7" t="s">
        <v>36</v>
      </c>
      <c r="F46" s="8">
        <v>24.3659042325167</v>
      </c>
      <c r="G46" s="9" />
    </row>
    <row r="47" spans="1:7" ht="15" customHeight="true">
      <c r="A47" s="3" t="s">
        <v>64</v>
      </c>
      <c r="B47" s="4" t="s">
        <v>33</v>
      </c>
      <c r="C47" s="7" t="s">
        <v>62</v>
      </c>
      <c r="D47" s="7" t="s">
        <v>35</v>
      </c>
      <c r="E47" s="7" t="s">
        <v>36</v>
      </c>
      <c r="F47" s="8">
        <v>25.7163987228999</v>
      </c>
      <c r="G47" s="9" />
    </row>
    <row r="48" spans="1:7" ht="15" customHeight="true">
      <c r="A48" s="3" t="s">
        <v>65</v>
      </c>
      <c r="B48" s="4" t="s">
        <v>33</v>
      </c>
      <c r="C48" s="7" t="s">
        <v>62</v>
      </c>
      <c r="D48" s="7" t="s">
        <v>35</v>
      </c>
      <c r="E48" s="7" t="s">
        <v>36</v>
      </c>
      <c r="F48" s="8">
        <v>25.7649944609893</v>
      </c>
      <c r="G48" s="9" />
    </row>
    <row r="49" spans="1:7" ht="15" customHeight="true">
      <c r="A49" s="3" t="s">
        <v>66</v>
      </c>
      <c r="B49" s="4" t="s">
        <v>33</v>
      </c>
      <c r="C49" s="7" t="s">
        <v>62</v>
      </c>
      <c r="D49" s="7" t="s">
        <v>35</v>
      </c>
      <c r="E49" s="7" t="s">
        <v>36</v>
      </c>
      <c r="F49" s="8">
        <v>24.334960538818</v>
      </c>
      <c r="G49" s="9" />
    </row>
    <row r="50" spans="1:7" ht="15" customHeight="true">
      <c r="A50" s="3" t="s">
        <v>67</v>
      </c>
      <c r="B50" s="4" t="s">
        <v>33</v>
      </c>
      <c r="C50" s="7" t="s">
        <v>62</v>
      </c>
      <c r="D50" s="7" t="s">
        <v>35</v>
      </c>
      <c r="E50" s="7" t="s">
        <v>36</v>
      </c>
      <c r="F50" s="8">
        <v>24.3599446871008</v>
      </c>
      <c r="G50" s="9" />
    </row>
    <row r="51" spans="1:7" ht="15" customHeight="true">
      <c r="A51" s="3" t="s">
        <v>68</v>
      </c>
      <c r="B51" s="4" t="s">
        <v>33</v>
      </c>
      <c r="C51" s="7" t="s">
        <v>62</v>
      </c>
      <c r="D51" s="7" t="s">
        <v>35</v>
      </c>
      <c r="E51" s="7" t="s">
        <v>36</v>
      </c>
      <c r="F51" s="8">
        <v>24.0527216191485</v>
      </c>
      <c r="G51" s="9" />
    </row>
    <row r="52" spans="1:7" ht="15" customHeight="true">
      <c r="A52" s="3" t="s">
        <v>69</v>
      </c>
      <c r="B52" s="4" t="s">
        <v>33</v>
      </c>
      <c r="C52" s="7" t="s">
        <v>62</v>
      </c>
      <c r="D52" s="7" t="s">
        <v>35</v>
      </c>
      <c r="E52" s="7" t="s">
        <v>36</v>
      </c>
      <c r="F52" s="8">
        <v>24.1006501343012</v>
      </c>
      <c r="G52" s="9" />
    </row>
    <row r="53" spans="1:7" ht="15" customHeight="true">
      <c r="A53" s="3" t="s">
        <v>70</v>
      </c>
      <c r="B53" s="4" t="s">
        <v>33</v>
      </c>
      <c r="C53" s="7" t="s">
        <v>62</v>
      </c>
      <c r="D53" s="7" t="s">
        <v>35</v>
      </c>
      <c r="E53" s="7" t="s">
        <v>36</v>
      </c>
      <c r="F53" s="8">
        <v>26.1026973779306</v>
      </c>
      <c r="G53" s="9" />
    </row>
    <row r="54" spans="1:7" ht="15" customHeight="true">
      <c r="A54" s="3" t="s">
        <v>71</v>
      </c>
      <c r="B54" s="4" t="s">
        <v>33</v>
      </c>
      <c r="C54" s="7" t="s">
        <v>62</v>
      </c>
      <c r="D54" s="7" t="s">
        <v>35</v>
      </c>
      <c r="E54" s="7" t="s">
        <v>36</v>
      </c>
      <c r="F54" s="8">
        <v>26.2065010212293</v>
      </c>
      <c r="G54" s="9" />
    </row>
    <row r="55" spans="1:7" ht="15" customHeight="true">
      <c r="A55" s="3" t="s">
        <v>72</v>
      </c>
      <c r="B55" s="4" t="s">
        <v>33</v>
      </c>
      <c r="C55" s="7" t="s">
        <v>62</v>
      </c>
      <c r="D55" s="7" t="s">
        <v>35</v>
      </c>
      <c r="E55" s="7" t="s">
        <v>36</v>
      </c>
      <c r="F55" s="8">
        <v>25.1588530645284</v>
      </c>
      <c r="G55" s="9" />
    </row>
    <row r="56" spans="1:7" ht="15" customHeight="true">
      <c r="A56" s="3" t="s">
        <v>73</v>
      </c>
      <c r="B56" s="4" t="s">
        <v>33</v>
      </c>
      <c r="C56" s="7" t="s">
        <v>62</v>
      </c>
      <c r="D56" s="7" t="s">
        <v>35</v>
      </c>
      <c r="E56" s="7" t="s">
        <v>36</v>
      </c>
      <c r="F56" s="8">
        <v>25.2341016502426</v>
      </c>
      <c r="G56" s="9" />
    </row>
    <row r="57" spans="1:7" ht="15" customHeight="true">
      <c r="A57" s="3" t="s">
        <v>74</v>
      </c>
      <c r="B57" s="4" t="s">
        <v>33</v>
      </c>
      <c r="C57" s="7" t="s">
        <v>34</v>
      </c>
      <c r="D57" s="7" t="s">
        <v>35</v>
      </c>
      <c r="E57" s="7" t="s">
        <v>36</v>
      </c>
      <c r="F57" s="8">
        <v>28.7179635457044</v>
      </c>
      <c r="G57" s="9" />
    </row>
    <row r="58" spans="1:7" ht="15" customHeight="true">
      <c r="A58" s="3" t="s">
        <v>75</v>
      </c>
      <c r="B58" s="4" t="s">
        <v>33</v>
      </c>
      <c r="C58" s="7" t="s">
        <v>34</v>
      </c>
      <c r="D58" s="7" t="s">
        <v>35</v>
      </c>
      <c r="E58" s="7" t="s">
        <v>36</v>
      </c>
      <c r="F58" s="8">
        <v>28.4487059241315</v>
      </c>
      <c r="G58" s="9" />
    </row>
    <row r="59" spans="1:7" ht="15" customHeight="true">
      <c r="A59" s="3" t="s">
        <v>76</v>
      </c>
      <c r="B59" s="4" t="s">
        <v>33</v>
      </c>
      <c r="C59" s="7" t="s">
        <v>34</v>
      </c>
      <c r="D59" s="7" t="s">
        <v>35</v>
      </c>
      <c r="E59" s="7" t="s">
        <v>36</v>
      </c>
      <c r="F59" s="8">
        <v>27.9341094206548</v>
      </c>
      <c r="G59" s="9" />
    </row>
    <row r="60" spans="1:7" ht="15" customHeight="true">
      <c r="A60" s="3" t="s">
        <v>77</v>
      </c>
      <c r="B60" s="4" t="s">
        <v>33</v>
      </c>
      <c r="C60" s="7" t="s">
        <v>34</v>
      </c>
      <c r="D60" s="7" t="s">
        <v>35</v>
      </c>
      <c r="E60" s="7" t="s">
        <v>36</v>
      </c>
      <c r="F60" s="8">
        <v>28.0572577239764</v>
      </c>
      <c r="G60" s="9" />
    </row>
    <row r="61" spans="1:7" ht="15" customHeight="true">
      <c r="A61" s="3" t="s">
        <v>78</v>
      </c>
      <c r="B61" s="4" t="s">
        <v>33</v>
      </c>
      <c r="C61" s="7" t="s">
        <v>34</v>
      </c>
      <c r="D61" s="7" t="s">
        <v>35</v>
      </c>
      <c r="E61" s="7" t="s">
        <v>36</v>
      </c>
      <c r="F61" s="8">
        <v>28.7740781828522</v>
      </c>
      <c r="G61" s="9" />
    </row>
    <row r="62" spans="1:7" ht="15" customHeight="true">
      <c r="A62" s="3" t="s">
        <v>79</v>
      </c>
      <c r="B62" s="4" t="s">
        <v>33</v>
      </c>
      <c r="C62" s="7" t="s">
        <v>34</v>
      </c>
      <c r="D62" s="7" t="s">
        <v>35</v>
      </c>
      <c r="E62" s="7" t="s">
        <v>36</v>
      </c>
      <c r="F62" s="8">
        <v>28.628938448051</v>
      </c>
      <c r="G62" s="9" />
    </row>
    <row r="63" spans="1:7" ht="15" customHeight="true">
      <c r="A63" s="3" t="s">
        <v>80</v>
      </c>
      <c r="B63" s="4" t="s">
        <v>33</v>
      </c>
      <c r="C63" s="7" t="s">
        <v>34</v>
      </c>
      <c r="D63" s="7" t="s">
        <v>35</v>
      </c>
      <c r="E63" s="7" t="s">
        <v>36</v>
      </c>
      <c r="F63" s="8">
        <v>28.908686714055</v>
      </c>
      <c r="G63" s="9" />
    </row>
    <row r="64" spans="1:7" ht="15" customHeight="true">
      <c r="A64" s="3" t="s">
        <v>81</v>
      </c>
      <c r="B64" s="4" t="s">
        <v>33</v>
      </c>
      <c r="C64" s="7" t="s">
        <v>34</v>
      </c>
      <c r="D64" s="7" t="s">
        <v>35</v>
      </c>
      <c r="E64" s="7" t="s">
        <v>36</v>
      </c>
      <c r="F64" s="8">
        <v>28.9142225623309</v>
      </c>
      <c r="G64" s="9" />
    </row>
    <row r="65" spans="1:7" ht="15" customHeight="true">
      <c r="A65" s="3" t="s">
        <v>82</v>
      </c>
      <c r="B65" s="4" t="s">
        <v>33</v>
      </c>
      <c r="C65" s="7" t="s">
        <v>34</v>
      </c>
      <c r="D65" s="7" t="s">
        <v>35</v>
      </c>
      <c r="E65" s="7" t="s">
        <v>36</v>
      </c>
      <c r="F65" s="8">
        <v>28.2342457699479</v>
      </c>
      <c r="G65" s="9" />
    </row>
    <row r="66" spans="1:7" ht="15" customHeight="true">
      <c r="A66" s="3" t="s">
        <v>83</v>
      </c>
      <c r="B66" s="4" t="s">
        <v>33</v>
      </c>
      <c r="C66" s="7" t="s">
        <v>34</v>
      </c>
      <c r="D66" s="7" t="s">
        <v>35</v>
      </c>
      <c r="E66" s="7" t="s">
        <v>36</v>
      </c>
      <c r="F66" s="8">
        <v>28.3537053363063</v>
      </c>
      <c r="G66" s="9" />
    </row>
    <row r="67" spans="1:7" ht="15" customHeight="true">
      <c r="A67" s="3" t="s">
        <v>84</v>
      </c>
      <c r="B67" s="4" t="s">
        <v>33</v>
      </c>
      <c r="C67" s="7" t="s">
        <v>34</v>
      </c>
      <c r="D67" s="7" t="s">
        <v>35</v>
      </c>
      <c r="E67" s="7" t="s">
        <v>36</v>
      </c>
      <c r="F67" s="8">
        <v>26.3985186304212</v>
      </c>
      <c r="G67" s="9" />
    </row>
    <row r="68" spans="1:7" ht="15" customHeight="true">
      <c r="A68" s="3" t="s">
        <v>85</v>
      </c>
      <c r="B68" s="4" t="s">
        <v>33</v>
      </c>
      <c r="C68" s="7" t="s">
        <v>34</v>
      </c>
      <c r="D68" s="7" t="s">
        <v>35</v>
      </c>
      <c r="E68" s="7" t="s">
        <v>36</v>
      </c>
      <c r="F68" s="8">
        <v>26.3265220601715</v>
      </c>
      <c r="G68" s="9" />
    </row>
    <row r="69" spans="1:7" ht="15" customHeight="true">
      <c r="A69" s="3" t="s">
        <v>86</v>
      </c>
      <c r="B69" s="4" t="s">
        <v>33</v>
      </c>
      <c r="C69" s="7" t="s">
        <v>49</v>
      </c>
      <c r="D69" s="7" t="s">
        <v>35</v>
      </c>
      <c r="E69" s="7" t="s">
        <v>36</v>
      </c>
      <c r="F69" s="8">
        <v>26.4243469009259</v>
      </c>
      <c r="G69" s="9" />
    </row>
    <row r="70" spans="1:7" ht="15" customHeight="true">
      <c r="A70" s="3" t="s">
        <v>87</v>
      </c>
      <c r="B70" s="4" t="s">
        <v>33</v>
      </c>
      <c r="C70" s="7" t="s">
        <v>49</v>
      </c>
      <c r="D70" s="7" t="s">
        <v>35</v>
      </c>
      <c r="E70" s="7" t="s">
        <v>36</v>
      </c>
      <c r="F70" s="8">
        <v>26.2877280455443</v>
      </c>
      <c r="G70" s="9" />
    </row>
    <row r="71" spans="1:7" ht="15" customHeight="true">
      <c r="A71" s="3" t="s">
        <v>88</v>
      </c>
      <c r="B71" s="4" t="s">
        <v>33</v>
      </c>
      <c r="C71" s="7" t="s">
        <v>49</v>
      </c>
      <c r="D71" s="7" t="s">
        <v>35</v>
      </c>
      <c r="E71" s="7" t="s">
        <v>36</v>
      </c>
      <c r="F71" s="8">
        <v>24.9905324258318</v>
      </c>
      <c r="G71" s="9" />
    </row>
    <row r="72" spans="1:7" ht="15" customHeight="true">
      <c r="A72" s="3" t="s">
        <v>89</v>
      </c>
      <c r="B72" s="4" t="s">
        <v>33</v>
      </c>
      <c r="C72" s="7" t="s">
        <v>49</v>
      </c>
      <c r="D72" s="7" t="s">
        <v>35</v>
      </c>
      <c r="E72" s="7" t="s">
        <v>36</v>
      </c>
      <c r="F72" s="8">
        <v>25.0664342401142</v>
      </c>
      <c r="G72" s="9" />
    </row>
    <row r="73" spans="1:7" ht="15" customHeight="true">
      <c r="A73" s="3" t="s">
        <v>90</v>
      </c>
      <c r="B73" s="4" t="s">
        <v>33</v>
      </c>
      <c r="C73" s="7" t="s">
        <v>49</v>
      </c>
      <c r="D73" s="7" t="s">
        <v>35</v>
      </c>
      <c r="E73" s="7" t="s">
        <v>36</v>
      </c>
      <c r="F73" s="8">
        <v>25.0081828859972</v>
      </c>
      <c r="G73" s="9" />
    </row>
    <row r="74" spans="1:7" ht="15" customHeight="true">
      <c r="A74" s="3" t="s">
        <v>91</v>
      </c>
      <c r="B74" s="4" t="s">
        <v>33</v>
      </c>
      <c r="C74" s="7" t="s">
        <v>49</v>
      </c>
      <c r="D74" s="7" t="s">
        <v>35</v>
      </c>
      <c r="E74" s="7" t="s">
        <v>36</v>
      </c>
      <c r="F74" s="8">
        <v>25.1577976777923</v>
      </c>
      <c r="G74" s="9" />
    </row>
    <row r="75" spans="1:7" ht="15" customHeight="true">
      <c r="A75" s="3" t="s">
        <v>92</v>
      </c>
      <c r="B75" s="4" t="s">
        <v>33</v>
      </c>
      <c r="C75" s="7" t="s">
        <v>49</v>
      </c>
      <c r="D75" s="7" t="s">
        <v>35</v>
      </c>
      <c r="E75" s="7" t="s">
        <v>36</v>
      </c>
      <c r="F75" s="8">
        <v>25.6431724591691</v>
      </c>
      <c r="G75" s="9" />
    </row>
    <row r="76" spans="1:7" ht="15" customHeight="true">
      <c r="A76" s="3" t="s">
        <v>93</v>
      </c>
      <c r="B76" s="4" t="s">
        <v>33</v>
      </c>
      <c r="C76" s="7" t="s">
        <v>49</v>
      </c>
      <c r="D76" s="7" t="s">
        <v>35</v>
      </c>
      <c r="E76" s="7" t="s">
        <v>36</v>
      </c>
      <c r="F76" s="8">
        <v>25.6565817496167</v>
      </c>
      <c r="G76" s="9" />
    </row>
    <row r="77" spans="1:7" ht="15" customHeight="true">
      <c r="A77" s="3" t="s">
        <v>94</v>
      </c>
      <c r="B77" s="4" t="s">
        <v>33</v>
      </c>
      <c r="C77" s="7" t="s">
        <v>49</v>
      </c>
      <c r="D77" s="7" t="s">
        <v>35</v>
      </c>
      <c r="E77" s="7" t="s">
        <v>36</v>
      </c>
      <c r="F77" s="8">
        <v>24.1401004416572</v>
      </c>
      <c r="G77" s="9" />
    </row>
    <row r="78" spans="1:7" ht="15" customHeight="true">
      <c r="A78" s="3" t="s">
        <v>95</v>
      </c>
      <c r="B78" s="4" t="s">
        <v>33</v>
      </c>
      <c r="C78" s="7" t="s">
        <v>49</v>
      </c>
      <c r="D78" s="7" t="s">
        <v>35</v>
      </c>
      <c r="E78" s="7" t="s">
        <v>36</v>
      </c>
      <c r="F78" s="8">
        <v>24.0386185210587</v>
      </c>
      <c r="G78" s="9" />
    </row>
    <row r="79" spans="1:7" ht="15" customHeight="true">
      <c r="A79" s="3" t="s">
        <v>96</v>
      </c>
      <c r="B79" s="4" t="s">
        <v>33</v>
      </c>
      <c r="C79" s="7" t="s">
        <v>49</v>
      </c>
      <c r="D79" s="7" t="s">
        <v>35</v>
      </c>
      <c r="E79" s="7" t="s">
        <v>36</v>
      </c>
      <c r="F79" s="8">
        <v>25.4580001549277</v>
      </c>
      <c r="G79" s="9" />
    </row>
    <row r="80" spans="1:7" ht="15" customHeight="true">
      <c r="A80" s="3" t="s">
        <v>97</v>
      </c>
      <c r="B80" s="4" t="s">
        <v>33</v>
      </c>
      <c r="C80" s="7" t="s">
        <v>49</v>
      </c>
      <c r="D80" s="7" t="s">
        <v>35</v>
      </c>
      <c r="E80" s="7" t="s">
        <v>36</v>
      </c>
      <c r="F80" s="8">
        <v>25.5615826445293</v>
      </c>
      <c r="G80" s="9" />
    </row>
    <row r="81" spans="1:7" ht="15" customHeight="true">
      <c r="A81" s="3" t="s">
        <v>98</v>
      </c>
      <c r="B81" s="4" t="s">
        <v>33</v>
      </c>
      <c r="C81" s="7" t="s">
        <v>62</v>
      </c>
      <c r="D81" s="7" t="s">
        <v>35</v>
      </c>
      <c r="E81" s="7" t="s">
        <v>36</v>
      </c>
      <c r="F81" s="8">
        <v>25.5488440189145</v>
      </c>
      <c r="G81" s="9" />
    </row>
    <row r="82" spans="1:7" ht="15" customHeight="true">
      <c r="A82" s="3" t="s">
        <v>99</v>
      </c>
      <c r="B82" s="4" t="s">
        <v>33</v>
      </c>
      <c r="C82" s="7" t="s">
        <v>62</v>
      </c>
      <c r="D82" s="7" t="s">
        <v>35</v>
      </c>
      <c r="E82" s="7" t="s">
        <v>36</v>
      </c>
      <c r="F82" s="8">
        <v>25.4689570626078</v>
      </c>
      <c r="G82" s="9" />
    </row>
    <row r="83" spans="1:7" ht="15" customHeight="true">
      <c r="A83" s="3" t="s">
        <v>100</v>
      </c>
      <c r="B83" s="4" t="s">
        <v>33</v>
      </c>
      <c r="C83" s="7" t="s">
        <v>62</v>
      </c>
      <c r="D83" s="7" t="s">
        <v>35</v>
      </c>
      <c r="E83" s="7" t="s">
        <v>36</v>
      </c>
      <c r="F83" s="8">
        <v>24.9405207970856</v>
      </c>
      <c r="G83" s="9" />
    </row>
    <row r="84" spans="1:7" ht="15" customHeight="true">
      <c r="A84" s="3" t="s">
        <v>101</v>
      </c>
      <c r="B84" s="4" t="s">
        <v>33</v>
      </c>
      <c r="C84" s="7" t="s">
        <v>62</v>
      </c>
      <c r="D84" s="7" t="s">
        <v>35</v>
      </c>
      <c r="E84" s="7" t="s">
        <v>36</v>
      </c>
      <c r="F84" s="8">
        <v>24.9916470497171</v>
      </c>
      <c r="G84" s="9" />
    </row>
    <row r="85" spans="1:7" ht="15" customHeight="true">
      <c r="A85" s="3" t="s">
        <v>102</v>
      </c>
      <c r="B85" s="4" t="s">
        <v>33</v>
      </c>
      <c r="C85" s="7" t="s">
        <v>62</v>
      </c>
      <c r="D85" s="7" t="s">
        <v>35</v>
      </c>
      <c r="E85" s="7" t="s">
        <v>36</v>
      </c>
      <c r="F85" s="8">
        <v>25.8939790613646</v>
      </c>
      <c r="G85" s="9" />
    </row>
    <row r="86" spans="1:7" ht="15" customHeight="true">
      <c r="A86" s="3" t="s">
        <v>103</v>
      </c>
      <c r="B86" s="4" t="s">
        <v>33</v>
      </c>
      <c r="C86" s="7" t="s">
        <v>62</v>
      </c>
      <c r="D86" s="7" t="s">
        <v>35</v>
      </c>
      <c r="E86" s="7" t="s">
        <v>36</v>
      </c>
      <c r="F86" s="8">
        <v>25.7013258778563</v>
      </c>
      <c r="G86" s="9" />
    </row>
    <row r="87" spans="1:7" ht="15" customHeight="true">
      <c r="A87" s="3" t="s">
        <v>104</v>
      </c>
      <c r="B87" s="4" t="s">
        <v>33</v>
      </c>
      <c r="C87" s="7" t="s">
        <v>62</v>
      </c>
      <c r="D87" s="7" t="s">
        <v>35</v>
      </c>
      <c r="E87" s="7" t="s">
        <v>36</v>
      </c>
      <c r="F87" s="8">
        <v>25.8881453519272</v>
      </c>
      <c r="G87" s="9" />
    </row>
    <row r="88" spans="1:7" ht="15" customHeight="true">
      <c r="A88" s="3" t="s">
        <v>105</v>
      </c>
      <c r="B88" s="4" t="s">
        <v>33</v>
      </c>
      <c r="C88" s="7" t="s">
        <v>62</v>
      </c>
      <c r="D88" s="7" t="s">
        <v>35</v>
      </c>
      <c r="E88" s="7" t="s">
        <v>36</v>
      </c>
      <c r="F88" s="8">
        <v>26.0654401267977</v>
      </c>
      <c r="G88" s="9" />
    </row>
    <row r="89" spans="1:7" ht="15" customHeight="true">
      <c r="A89" s="3" t="s">
        <v>106</v>
      </c>
      <c r="B89" s="4" t="s">
        <v>33</v>
      </c>
      <c r="C89" s="7" t="s">
        <v>62</v>
      </c>
      <c r="D89" s="7" t="s">
        <v>35</v>
      </c>
      <c r="E89" s="7" t="s">
        <v>36</v>
      </c>
      <c r="F89" s="8">
        <v>24.870606019853</v>
      </c>
      <c r="G89" s="9" />
    </row>
    <row r="90" spans="1:7" ht="15" customHeight="true">
      <c r="A90" s="3" t="s">
        <v>107</v>
      </c>
      <c r="B90" s="4" t="s">
        <v>33</v>
      </c>
      <c r="C90" s="7" t="s">
        <v>62</v>
      </c>
      <c r="D90" s="7" t="s">
        <v>35</v>
      </c>
      <c r="E90" s="7" t="s">
        <v>36</v>
      </c>
      <c r="F90" s="8">
        <v>24.9259753526066</v>
      </c>
      <c r="G90" s="9" />
    </row>
    <row r="91" spans="1:7" ht="15" customHeight="true">
      <c r="A91" s="3" t="s">
        <v>108</v>
      </c>
      <c r="B91" s="4" t="s">
        <v>33</v>
      </c>
      <c r="C91" s="7" t="s">
        <v>62</v>
      </c>
      <c r="D91" s="7" t="s">
        <v>35</v>
      </c>
      <c r="E91" s="7" t="s">
        <v>36</v>
      </c>
      <c r="F91" s="8">
        <v>25.4681912315062</v>
      </c>
      <c r="G91" s="9" />
    </row>
    <row r="92" spans="1:7" ht="15" customHeight="true">
      <c r="A92" s="3" t="s">
        <v>109</v>
      </c>
      <c r="B92" s="4" t="s">
        <v>33</v>
      </c>
      <c r="C92" s="7" t="s">
        <v>62</v>
      </c>
      <c r="D92" s="7" t="s">
        <v>35</v>
      </c>
      <c r="E92" s="7" t="s">
        <v>36</v>
      </c>
      <c r="F92" s="8">
        <v>25.5431877888814</v>
      </c>
      <c r="G92" s="9" />
    </row>
    <row r="93" spans="1:7" ht="15" customHeight="true">
      <c r="A93" s="3" t="s">
        <v>32</v>
      </c>
      <c r="B93" s="4" t="s">
        <v>110</v>
      </c>
      <c r="C93" s="7" t="s">
        <v>111</v>
      </c>
      <c r="D93" s="7" t="s">
        <v>35</v>
      </c>
      <c r="E93" s="7" t="s">
        <v>36</v>
      </c>
      <c r="F93" s="8">
        <v>23.9851441675764</v>
      </c>
      <c r="G93" s="9" />
    </row>
    <row r="94" spans="1:7" ht="15" customHeight="true">
      <c r="A94" s="3" t="s">
        <v>37</v>
      </c>
      <c r="B94" s="4" t="s">
        <v>110</v>
      </c>
      <c r="C94" s="7" t="s">
        <v>111</v>
      </c>
      <c r="D94" s="7" t="s">
        <v>35</v>
      </c>
      <c r="E94" s="7" t="s">
        <v>36</v>
      </c>
      <c r="F94" s="8">
        <v>24.0920405207731</v>
      </c>
      <c r="G94" s="9" />
    </row>
    <row r="95" spans="1:7" ht="15" customHeight="true">
      <c r="A95" s="3" t="s">
        <v>38</v>
      </c>
      <c r="B95" s="4" t="s">
        <v>110</v>
      </c>
      <c r="C95" s="7" t="s">
        <v>111</v>
      </c>
      <c r="D95" s="7" t="s">
        <v>35</v>
      </c>
      <c r="E95" s="7" t="s">
        <v>36</v>
      </c>
      <c r="F95" s="8">
        <v>25.9745783248344</v>
      </c>
      <c r="G95" s="9" />
    </row>
    <row r="96" spans="1:7" ht="15" customHeight="true">
      <c r="A96" s="3" t="s">
        <v>39</v>
      </c>
      <c r="B96" s="4" t="s">
        <v>110</v>
      </c>
      <c r="C96" s="7" t="s">
        <v>111</v>
      </c>
      <c r="D96" s="7" t="s">
        <v>35</v>
      </c>
      <c r="E96" s="7" t="s">
        <v>36</v>
      </c>
      <c r="F96" s="8">
        <v>25.9515126787874</v>
      </c>
      <c r="G96" s="9" />
    </row>
    <row r="97" spans="1:7" ht="15" customHeight="true">
      <c r="A97" s="3" t="s">
        <v>40</v>
      </c>
      <c r="B97" s="4" t="s">
        <v>110</v>
      </c>
      <c r="C97" s="7" t="s">
        <v>111</v>
      </c>
      <c r="D97" s="7" t="s">
        <v>35</v>
      </c>
      <c r="E97" s="7" t="s">
        <v>36</v>
      </c>
      <c r="F97" s="8">
        <v>24.3447286851989</v>
      </c>
      <c r="G97" s="9" />
    </row>
    <row r="98" spans="1:7" ht="15" customHeight="true">
      <c r="A98" s="3" t="s">
        <v>41</v>
      </c>
      <c r="B98" s="4" t="s">
        <v>110</v>
      </c>
      <c r="C98" s="7" t="s">
        <v>111</v>
      </c>
      <c r="D98" s="7" t="s">
        <v>35</v>
      </c>
      <c r="E98" s="7" t="s">
        <v>36</v>
      </c>
      <c r="F98" s="8">
        <v>24.2520057790465</v>
      </c>
      <c r="G98" s="9" />
    </row>
    <row r="99" spans="1:7" ht="15" customHeight="true">
      <c r="A99" s="3" t="s">
        <v>42</v>
      </c>
      <c r="B99" s="4" t="s">
        <v>110</v>
      </c>
      <c r="C99" s="7" t="s">
        <v>111</v>
      </c>
      <c r="D99" s="7" t="s">
        <v>35</v>
      </c>
      <c r="E99" s="7" t="s">
        <v>36</v>
      </c>
      <c r="F99" s="8">
        <v>25.1385701773579</v>
      </c>
      <c r="G99" s="9" />
    </row>
    <row r="100" spans="1:7" ht="15" customHeight="true">
      <c r="A100" s="3" t="s">
        <v>43</v>
      </c>
      <c r="B100" s="4" t="s">
        <v>110</v>
      </c>
      <c r="C100" s="7" t="s">
        <v>111</v>
      </c>
      <c r="D100" s="7" t="s">
        <v>35</v>
      </c>
      <c r="E100" s="7" t="s">
        <v>36</v>
      </c>
      <c r="F100" s="8">
        <v>25.1746708229589</v>
      </c>
      <c r="G100" s="9" />
    </row>
    <row r="101" spans="1:7" ht="15" customHeight="true">
      <c r="A101" s="3" t="s">
        <v>44</v>
      </c>
      <c r="B101" s="4" t="s">
        <v>110</v>
      </c>
      <c r="C101" s="7" t="s">
        <v>111</v>
      </c>
      <c r="D101" s="7" t="s">
        <v>35</v>
      </c>
      <c r="E101" s="7" t="s">
        <v>36</v>
      </c>
      <c r="F101" s="8">
        <v>26.1813937715086</v>
      </c>
      <c r="G101" s="9" />
    </row>
    <row r="102" spans="1:7" ht="15" customHeight="true">
      <c r="A102" s="3" t="s">
        <v>45</v>
      </c>
      <c r="B102" s="4" t="s">
        <v>110</v>
      </c>
      <c r="C102" s="7" t="s">
        <v>111</v>
      </c>
      <c r="D102" s="7" t="s">
        <v>35</v>
      </c>
      <c r="E102" s="7" t="s">
        <v>36</v>
      </c>
      <c r="F102" s="8">
        <v>26.139570998848</v>
      </c>
      <c r="G102" s="9" />
    </row>
    <row r="103" spans="1:7" ht="15" customHeight="true">
      <c r="A103" s="3" t="s">
        <v>46</v>
      </c>
      <c r="B103" s="4" t="s">
        <v>110</v>
      </c>
      <c r="C103" s="7" t="s">
        <v>111</v>
      </c>
      <c r="D103" s="7" t="s">
        <v>35</v>
      </c>
      <c r="E103" s="7" t="s">
        <v>36</v>
      </c>
      <c r="F103" s="8">
        <v>25.2446061417332</v>
      </c>
      <c r="G103" s="9" />
    </row>
    <row r="104" spans="1:7" ht="15" customHeight="true">
      <c r="A104" s="3" t="s">
        <v>47</v>
      </c>
      <c r="B104" s="4" t="s">
        <v>110</v>
      </c>
      <c r="C104" s="7" t="s">
        <v>111</v>
      </c>
      <c r="D104" s="7" t="s">
        <v>35</v>
      </c>
      <c r="E104" s="7" t="s">
        <v>36</v>
      </c>
      <c r="F104" s="8">
        <v>25.1954737750381</v>
      </c>
      <c r="G104" s="9" />
    </row>
    <row r="105" spans="1:7" ht="15" customHeight="true">
      <c r="A105" s="3" t="s">
        <v>48</v>
      </c>
      <c r="B105" s="4" t="s">
        <v>110</v>
      </c>
      <c r="C105" s="7" t="s">
        <v>112</v>
      </c>
      <c r="D105" s="7" t="s">
        <v>35</v>
      </c>
      <c r="E105" s="7" t="s">
        <v>36</v>
      </c>
      <c r="F105" s="8">
        <v>27.1839536286282</v>
      </c>
      <c r="G105" s="9" />
    </row>
    <row r="106" spans="1:7" ht="15" customHeight="true">
      <c r="A106" s="3" t="s">
        <v>50</v>
      </c>
      <c r="B106" s="4" t="s">
        <v>110</v>
      </c>
      <c r="C106" s="7" t="s">
        <v>112</v>
      </c>
      <c r="D106" s="7" t="s">
        <v>35</v>
      </c>
      <c r="E106" s="7" t="s">
        <v>36</v>
      </c>
      <c r="F106" s="8">
        <v>27.1227929872385</v>
      </c>
      <c r="G106" s="9" />
    </row>
    <row r="107" spans="1:7" ht="15" customHeight="true">
      <c r="A107" s="3" t="s">
        <v>51</v>
      </c>
      <c r="B107" s="4" t="s">
        <v>110</v>
      </c>
      <c r="C107" s="7" t="s">
        <v>112</v>
      </c>
      <c r="D107" s="7" t="s">
        <v>35</v>
      </c>
      <c r="E107" s="7" t="s">
        <v>36</v>
      </c>
      <c r="F107" s="8">
        <v>29.0763552609187</v>
      </c>
      <c r="G107" s="9" />
    </row>
    <row r="108" spans="1:7" ht="15" customHeight="true">
      <c r="A108" s="3" t="s">
        <v>52</v>
      </c>
      <c r="B108" s="4" t="s">
        <v>110</v>
      </c>
      <c r="C108" s="7" t="s">
        <v>112</v>
      </c>
      <c r="D108" s="7" t="s">
        <v>35</v>
      </c>
      <c r="E108" s="7" t="s">
        <v>36</v>
      </c>
      <c r="F108" s="8">
        <v>29.2345510633118</v>
      </c>
      <c r="G108" s="9" />
    </row>
    <row r="109" spans="1:7" ht="15" customHeight="true">
      <c r="A109" s="3" t="s">
        <v>53</v>
      </c>
      <c r="B109" s="4" t="s">
        <v>110</v>
      </c>
      <c r="C109" s="7" t="s">
        <v>112</v>
      </c>
      <c r="D109" s="7" t="s">
        <v>35</v>
      </c>
      <c r="E109" s="7" t="s">
        <v>36</v>
      </c>
      <c r="F109" s="8">
        <v>27.5501988254983</v>
      </c>
      <c r="G109" s="9" />
    </row>
    <row r="110" spans="1:7" ht="15" customHeight="true">
      <c r="A110" s="3" t="s">
        <v>54</v>
      </c>
      <c r="B110" s="4" t="s">
        <v>110</v>
      </c>
      <c r="C110" s="7" t="s">
        <v>112</v>
      </c>
      <c r="D110" s="7" t="s">
        <v>35</v>
      </c>
      <c r="E110" s="7" t="s">
        <v>36</v>
      </c>
      <c r="F110" s="8">
        <v>27.5933864945632</v>
      </c>
      <c r="G110" s="9" />
    </row>
    <row r="111" spans="1:7" ht="15" customHeight="true">
      <c r="A111" s="3" t="s">
        <v>55</v>
      </c>
      <c r="B111" s="4" t="s">
        <v>110</v>
      </c>
      <c r="C111" s="7" t="s">
        <v>112</v>
      </c>
      <c r="D111" s="7" t="s">
        <v>35</v>
      </c>
      <c r="E111" s="7" t="s">
        <v>36</v>
      </c>
      <c r="F111" s="8">
        <v>28.2811584106603</v>
      </c>
      <c r="G111" s="9" />
    </row>
    <row r="112" spans="1:7" ht="15" customHeight="true">
      <c r="A112" s="3" t="s">
        <v>56</v>
      </c>
      <c r="B112" s="4" t="s">
        <v>110</v>
      </c>
      <c r="C112" s="7" t="s">
        <v>112</v>
      </c>
      <c r="D112" s="7" t="s">
        <v>35</v>
      </c>
      <c r="E112" s="7" t="s">
        <v>36</v>
      </c>
      <c r="F112" s="8">
        <v>28.3243800728335</v>
      </c>
      <c r="G112" s="9" />
    </row>
    <row r="113" spans="1:7" ht="15" customHeight="true">
      <c r="A113" s="3" t="s">
        <v>57</v>
      </c>
      <c r="B113" s="4" t="s">
        <v>110</v>
      </c>
      <c r="C113" s="7" t="s">
        <v>112</v>
      </c>
      <c r="D113" s="7" t="s">
        <v>35</v>
      </c>
      <c r="E113" s="7" t="s">
        <v>36</v>
      </c>
      <c r="F113" s="8">
        <v>29.8226936192141</v>
      </c>
      <c r="G113" s="9" />
    </row>
    <row r="114" spans="1:7" ht="15" customHeight="true">
      <c r="A114" s="3" t="s">
        <v>58</v>
      </c>
      <c r="B114" s="4" t="s">
        <v>110</v>
      </c>
      <c r="C114" s="7" t="s">
        <v>112</v>
      </c>
      <c r="D114" s="7" t="s">
        <v>35</v>
      </c>
      <c r="E114" s="7" t="s">
        <v>36</v>
      </c>
      <c r="F114" s="8">
        <v>29.8013187723834</v>
      </c>
      <c r="G114" s="9" />
    </row>
    <row r="115" spans="1:7" ht="15" customHeight="true">
      <c r="A115" s="3" t="s">
        <v>59</v>
      </c>
      <c r="B115" s="4" t="s">
        <v>110</v>
      </c>
      <c r="C115" s="7" t="s">
        <v>112</v>
      </c>
      <c r="D115" s="7" t="s">
        <v>35</v>
      </c>
      <c r="E115" s="7" t="s">
        <v>36</v>
      </c>
      <c r="F115" s="8">
        <v>29.513600765759</v>
      </c>
      <c r="G115" s="9" />
    </row>
    <row r="116" spans="1:7" ht="15" customHeight="true">
      <c r="A116" s="3" t="s">
        <v>60</v>
      </c>
      <c r="B116" s="4" t="s">
        <v>110</v>
      </c>
      <c r="C116" s="7" t="s">
        <v>112</v>
      </c>
      <c r="D116" s="7" t="s">
        <v>35</v>
      </c>
      <c r="E116" s="7" t="s">
        <v>36</v>
      </c>
      <c r="F116" s="8">
        <v>29.3495694191079</v>
      </c>
      <c r="G116" s="9" />
    </row>
    <row r="117" spans="1:7" ht="15" customHeight="true">
      <c r="A117" s="3" t="s">
        <v>113</v>
      </c>
      <c r="B117" s="4" t="s">
        <v>110</v>
      </c>
      <c r="C117" s="7" t="s">
        <v>114</v>
      </c>
      <c r="D117" s="7" t="s">
        <v>35</v>
      </c>
      <c r="E117" s="7" t="s">
        <v>36</v>
      </c>
      <c r="F117" s="8">
        <v>28.2934746268356</v>
      </c>
      <c r="G117" s="9" />
    </row>
    <row r="118" spans="1:7" ht="15" customHeight="true">
      <c r="A118" s="3" t="s">
        <v>115</v>
      </c>
      <c r="B118" s="4" t="s">
        <v>110</v>
      </c>
      <c r="C118" s="7" t="s">
        <v>114</v>
      </c>
      <c r="D118" s="7" t="s">
        <v>35</v>
      </c>
      <c r="E118" s="7" t="s">
        <v>36</v>
      </c>
      <c r="F118" s="8">
        <v>28.1429596266539</v>
      </c>
      <c r="G118" s="9" />
    </row>
    <row r="119" spans="1:7" ht="15" customHeight="true">
      <c r="A119" s="3" t="s">
        <v>116</v>
      </c>
      <c r="B119" s="4" t="s">
        <v>110</v>
      </c>
      <c r="C119" s="7" t="s">
        <v>114</v>
      </c>
      <c r="D119" s="7" t="s">
        <v>35</v>
      </c>
      <c r="E119" s="7" t="s">
        <v>36</v>
      </c>
      <c r="F119" s="8">
        <v>48.4541892543511</v>
      </c>
      <c r="G119" s="9" />
    </row>
    <row r="120" spans="1:7" ht="15" customHeight="true">
      <c r="A120" s="3" t="s">
        <v>117</v>
      </c>
      <c r="B120" s="4" t="s">
        <v>110</v>
      </c>
      <c r="C120" s="7" t="s">
        <v>114</v>
      </c>
      <c r="D120" s="7" t="s">
        <v>35</v>
      </c>
      <c r="E120" s="7" t="s">
        <v>36</v>
      </c>
      <c r="F120" s="8" />
      <c r="G120" s="9" />
    </row>
    <row r="121" spans="1:7" ht="15" customHeight="true">
      <c r="A121" s="3" t="s">
        <v>118</v>
      </c>
      <c r="B121" s="4" t="s">
        <v>110</v>
      </c>
      <c r="C121" s="7" t="s">
        <v>114</v>
      </c>
      <c r="D121" s="7" t="s">
        <v>35</v>
      </c>
      <c r="E121" s="7" t="s">
        <v>36</v>
      </c>
      <c r="F121" s="8">
        <v>28.3608245229191</v>
      </c>
      <c r="G121" s="9" />
    </row>
    <row r="122" spans="1:7" ht="15" customHeight="true">
      <c r="A122" s="3" t="s">
        <v>119</v>
      </c>
      <c r="B122" s="4" t="s">
        <v>110</v>
      </c>
      <c r="C122" s="7" t="s">
        <v>114</v>
      </c>
      <c r="D122" s="7" t="s">
        <v>35</v>
      </c>
      <c r="E122" s="7" t="s">
        <v>36</v>
      </c>
      <c r="F122" s="8">
        <v>28.0629678736468</v>
      </c>
      <c r="G122" s="9" />
    </row>
    <row r="123" spans="1:7" ht="15" customHeight="true">
      <c r="A123" s="3" t="s">
        <v>120</v>
      </c>
      <c r="B123" s="4" t="s">
        <v>110</v>
      </c>
      <c r="C123" s="7" t="s">
        <v>114</v>
      </c>
      <c r="D123" s="7" t="s">
        <v>35</v>
      </c>
      <c r="E123" s="7" t="s">
        <v>36</v>
      </c>
      <c r="F123" s="8">
        <v>41.8682081414359</v>
      </c>
      <c r="G123" s="9" />
    </row>
    <row r="124" spans="1:7" ht="15" customHeight="true">
      <c r="A124" s="3" t="s">
        <v>121</v>
      </c>
      <c r="B124" s="4" t="s">
        <v>110</v>
      </c>
      <c r="C124" s="7" t="s">
        <v>114</v>
      </c>
      <c r="D124" s="7" t="s">
        <v>35</v>
      </c>
      <c r="E124" s="7" t="s">
        <v>36</v>
      </c>
      <c r="F124" s="8">
        <v>39.0506302549048</v>
      </c>
      <c r="G124" s="9" />
    </row>
    <row r="125" spans="1:7" ht="15" customHeight="true">
      <c r="A125" s="3" t="s">
        <v>122</v>
      </c>
      <c r="B125" s="4" t="s">
        <v>110</v>
      </c>
      <c r="C125" s="7" t="s">
        <v>114</v>
      </c>
      <c r="D125" s="7" t="s">
        <v>35</v>
      </c>
      <c r="E125" s="7" t="s">
        <v>36</v>
      </c>
      <c r="F125" s="8">
        <v>31.9682096633694</v>
      </c>
      <c r="G125" s="9" />
    </row>
    <row r="126" spans="1:7" ht="15" customHeight="true">
      <c r="A126" s="3" t="s">
        <v>123</v>
      </c>
      <c r="B126" s="4" t="s">
        <v>110</v>
      </c>
      <c r="C126" s="7" t="s">
        <v>114</v>
      </c>
      <c r="D126" s="7" t="s">
        <v>35</v>
      </c>
      <c r="E126" s="7" t="s">
        <v>36</v>
      </c>
      <c r="F126" s="8">
        <v>32.0732969563509</v>
      </c>
      <c r="G126" s="9" />
    </row>
    <row r="127" spans="1:7" ht="15" customHeight="true">
      <c r="A127" s="3" t="s">
        <v>124</v>
      </c>
      <c r="B127" s="4" t="s">
        <v>110</v>
      </c>
      <c r="C127" s="7" t="s">
        <v>114</v>
      </c>
      <c r="D127" s="7" t="s">
        <v>35</v>
      </c>
      <c r="E127" s="7" t="s">
        <v>36</v>
      </c>
      <c r="F127" s="8" />
      <c r="G127" s="9" />
    </row>
    <row r="128" spans="1:7" ht="15" customHeight="true">
      <c r="A128" s="3" t="s">
        <v>125</v>
      </c>
      <c r="B128" s="4" t="s">
        <v>110</v>
      </c>
      <c r="C128" s="7" t="s">
        <v>114</v>
      </c>
      <c r="D128" s="7" t="s">
        <v>35</v>
      </c>
      <c r="E128" s="7" t="s">
        <v>36</v>
      </c>
      <c r="F128" s="8">
        <v>39.3868933737731</v>
      </c>
      <c r="G128" s="9" />
    </row>
    <row r="129" spans="1:7" ht="15" customHeight="true">
      <c r="A129" s="3" t="s">
        <v>74</v>
      </c>
      <c r="B129" s="4" t="s">
        <v>110</v>
      </c>
      <c r="C129" s="7" t="s">
        <v>111</v>
      </c>
      <c r="D129" s="7" t="s">
        <v>35</v>
      </c>
      <c r="E129" s="7" t="s">
        <v>36</v>
      </c>
      <c r="F129" s="8">
        <v>26.0509331642567</v>
      </c>
      <c r="G129" s="9" />
    </row>
    <row r="130" spans="1:7" ht="15" customHeight="true">
      <c r="A130" s="3" t="s">
        <v>75</v>
      </c>
      <c r="B130" s="4" t="s">
        <v>110</v>
      </c>
      <c r="C130" s="7" t="s">
        <v>111</v>
      </c>
      <c r="D130" s="7" t="s">
        <v>35</v>
      </c>
      <c r="E130" s="7" t="s">
        <v>36</v>
      </c>
      <c r="F130" s="8">
        <v>25.8917356056473</v>
      </c>
      <c r="G130" s="9" />
    </row>
    <row r="131" spans="1:7" ht="15" customHeight="true">
      <c r="A131" s="3" t="s">
        <v>76</v>
      </c>
      <c r="B131" s="4" t="s">
        <v>110</v>
      </c>
      <c r="C131" s="7" t="s">
        <v>111</v>
      </c>
      <c r="D131" s="7" t="s">
        <v>35</v>
      </c>
      <c r="E131" s="7" t="s">
        <v>36</v>
      </c>
      <c r="F131" s="8">
        <v>24.3733832212898</v>
      </c>
      <c r="G131" s="9" />
    </row>
    <row r="132" spans="1:7" ht="15" customHeight="true">
      <c r="A132" s="3" t="s">
        <v>77</v>
      </c>
      <c r="B132" s="4" t="s">
        <v>110</v>
      </c>
      <c r="C132" s="7" t="s">
        <v>111</v>
      </c>
      <c r="D132" s="7" t="s">
        <v>35</v>
      </c>
      <c r="E132" s="7" t="s">
        <v>36</v>
      </c>
      <c r="F132" s="8">
        <v>24.3767739863575</v>
      </c>
      <c r="G132" s="9" />
    </row>
    <row r="133" spans="1:7" ht="15" customHeight="true">
      <c r="A133" s="3" t="s">
        <v>78</v>
      </c>
      <c r="B133" s="4" t="s">
        <v>110</v>
      </c>
      <c r="C133" s="7" t="s">
        <v>111</v>
      </c>
      <c r="D133" s="7" t="s">
        <v>35</v>
      </c>
      <c r="E133" s="7" t="s">
        <v>36</v>
      </c>
      <c r="F133" s="8">
        <v>24.4580873453701</v>
      </c>
      <c r="G133" s="9" />
    </row>
    <row r="134" spans="1:7" ht="15" customHeight="true">
      <c r="A134" s="3" t="s">
        <v>79</v>
      </c>
      <c r="B134" s="4" t="s">
        <v>110</v>
      </c>
      <c r="C134" s="7" t="s">
        <v>111</v>
      </c>
      <c r="D134" s="7" t="s">
        <v>35</v>
      </c>
      <c r="E134" s="7" t="s">
        <v>36</v>
      </c>
      <c r="F134" s="8">
        <v>24.4472188337994</v>
      </c>
      <c r="G134" s="9" />
    </row>
    <row r="135" spans="1:7" ht="15" customHeight="true">
      <c r="A135" s="3" t="s">
        <v>80</v>
      </c>
      <c r="B135" s="4" t="s">
        <v>110</v>
      </c>
      <c r="C135" s="7" t="s">
        <v>111</v>
      </c>
      <c r="D135" s="7" t="s">
        <v>35</v>
      </c>
      <c r="E135" s="7" t="s">
        <v>36</v>
      </c>
      <c r="F135" s="8">
        <v>25.2746766933656</v>
      </c>
      <c r="G135" s="9" />
    </row>
    <row r="136" spans="1:7" ht="15" customHeight="true">
      <c r="A136" s="3" t="s">
        <v>81</v>
      </c>
      <c r="B136" s="4" t="s">
        <v>110</v>
      </c>
      <c r="C136" s="7" t="s">
        <v>111</v>
      </c>
      <c r="D136" s="7" t="s">
        <v>35</v>
      </c>
      <c r="E136" s="7" t="s">
        <v>36</v>
      </c>
      <c r="F136" s="8">
        <v>25.2338712533614</v>
      </c>
      <c r="G136" s="9" />
    </row>
    <row r="137" spans="1:7" ht="15" customHeight="true">
      <c r="A137" s="3" t="s">
        <v>82</v>
      </c>
      <c r="B137" s="4" t="s">
        <v>110</v>
      </c>
      <c r="C137" s="7" t="s">
        <v>111</v>
      </c>
      <c r="D137" s="7" t="s">
        <v>35</v>
      </c>
      <c r="E137" s="7" t="s">
        <v>36</v>
      </c>
      <c r="F137" s="8">
        <v>23.4837207238539</v>
      </c>
      <c r="G137" s="9" />
    </row>
    <row r="138" spans="1:7" ht="15" customHeight="true">
      <c r="A138" s="3" t="s">
        <v>83</v>
      </c>
      <c r="B138" s="4" t="s">
        <v>110</v>
      </c>
      <c r="C138" s="7" t="s">
        <v>111</v>
      </c>
      <c r="D138" s="7" t="s">
        <v>35</v>
      </c>
      <c r="E138" s="7" t="s">
        <v>36</v>
      </c>
      <c r="F138" s="8">
        <v>23.4939200233382</v>
      </c>
      <c r="G138" s="9" />
    </row>
    <row r="139" spans="1:7" ht="15" customHeight="true">
      <c r="A139" s="3" t="s">
        <v>84</v>
      </c>
      <c r="B139" s="4" t="s">
        <v>110</v>
      </c>
      <c r="C139" s="7" t="s">
        <v>111</v>
      </c>
      <c r="D139" s="7" t="s">
        <v>35</v>
      </c>
      <c r="E139" s="7" t="s">
        <v>36</v>
      </c>
      <c r="F139" s="8">
        <v>25.0165194807952</v>
      </c>
      <c r="G139" s="9" />
    </row>
    <row r="140" spans="1:7" ht="15" customHeight="true">
      <c r="A140" s="3" t="s">
        <v>85</v>
      </c>
      <c r="B140" s="4" t="s">
        <v>110</v>
      </c>
      <c r="C140" s="7" t="s">
        <v>111</v>
      </c>
      <c r="D140" s="7" t="s">
        <v>35</v>
      </c>
      <c r="E140" s="7" t="s">
        <v>36</v>
      </c>
      <c r="F140" s="8">
        <v>25.0357683730757</v>
      </c>
      <c r="G140" s="9" />
    </row>
    <row r="141" spans="1:7" ht="15" customHeight="true">
      <c r="A141" s="3" t="s">
        <v>86</v>
      </c>
      <c r="B141" s="4" t="s">
        <v>110</v>
      </c>
      <c r="C141" s="7" t="s">
        <v>112</v>
      </c>
      <c r="D141" s="7" t="s">
        <v>35</v>
      </c>
      <c r="E141" s="7" t="s">
        <v>36</v>
      </c>
      <c r="F141" s="8">
        <v>31.0853223565137</v>
      </c>
      <c r="G141" s="9" />
    </row>
    <row r="142" spans="1:7" ht="15" customHeight="true">
      <c r="A142" s="3" t="s">
        <v>87</v>
      </c>
      <c r="B142" s="4" t="s">
        <v>110</v>
      </c>
      <c r="C142" s="7" t="s">
        <v>112</v>
      </c>
      <c r="D142" s="7" t="s">
        <v>35</v>
      </c>
      <c r="E142" s="7" t="s">
        <v>36</v>
      </c>
      <c r="F142" s="8">
        <v>30.9184142732796</v>
      </c>
      <c r="G142" s="9" />
    </row>
    <row r="143" spans="1:7" ht="15" customHeight="true">
      <c r="A143" s="3" t="s">
        <v>88</v>
      </c>
      <c r="B143" s="4" t="s">
        <v>110</v>
      </c>
      <c r="C143" s="7" t="s">
        <v>112</v>
      </c>
      <c r="D143" s="7" t="s">
        <v>35</v>
      </c>
      <c r="E143" s="7" t="s">
        <v>36</v>
      </c>
      <c r="F143" s="8">
        <v>28.371616923232</v>
      </c>
      <c r="G143" s="9" />
    </row>
    <row r="144" spans="1:7" ht="15" customHeight="true">
      <c r="A144" s="3" t="s">
        <v>89</v>
      </c>
      <c r="B144" s="4" t="s">
        <v>110</v>
      </c>
      <c r="C144" s="7" t="s">
        <v>112</v>
      </c>
      <c r="D144" s="7" t="s">
        <v>35</v>
      </c>
      <c r="E144" s="7" t="s">
        <v>36</v>
      </c>
      <c r="F144" s="8">
        <v>28.4123936186998</v>
      </c>
      <c r="G144" s="9" />
    </row>
    <row r="145" spans="1:7" ht="15" customHeight="true">
      <c r="A145" s="3" t="s">
        <v>90</v>
      </c>
      <c r="B145" s="4" t="s">
        <v>110</v>
      </c>
      <c r="C145" s="7" t="s">
        <v>112</v>
      </c>
      <c r="D145" s="7" t="s">
        <v>35</v>
      </c>
      <c r="E145" s="7" t="s">
        <v>36</v>
      </c>
      <c r="F145" s="8">
        <v>30.3058818400538</v>
      </c>
      <c r="G145" s="9" />
    </row>
    <row r="146" spans="1:7" ht="15" customHeight="true">
      <c r="A146" s="3" t="s">
        <v>91</v>
      </c>
      <c r="B146" s="4" t="s">
        <v>110</v>
      </c>
      <c r="C146" s="7" t="s">
        <v>112</v>
      </c>
      <c r="D146" s="7" t="s">
        <v>35</v>
      </c>
      <c r="E146" s="7" t="s">
        <v>36</v>
      </c>
      <c r="F146" s="8">
        <v>30.2423136671201</v>
      </c>
      <c r="G146" s="9" />
    </row>
    <row r="147" spans="1:7" ht="15" customHeight="true">
      <c r="A147" s="3" t="s">
        <v>92</v>
      </c>
      <c r="B147" s="4" t="s">
        <v>110</v>
      </c>
      <c r="C147" s="7" t="s">
        <v>112</v>
      </c>
      <c r="D147" s="7" t="s">
        <v>35</v>
      </c>
      <c r="E147" s="7" t="s">
        <v>36</v>
      </c>
      <c r="F147" s="8">
        <v>30.2825205639048</v>
      </c>
      <c r="G147" s="9" />
    </row>
    <row r="148" spans="1:7" ht="15" customHeight="true">
      <c r="A148" s="3" t="s">
        <v>93</v>
      </c>
      <c r="B148" s="4" t="s">
        <v>110</v>
      </c>
      <c r="C148" s="7" t="s">
        <v>112</v>
      </c>
      <c r="D148" s="7" t="s">
        <v>35</v>
      </c>
      <c r="E148" s="7" t="s">
        <v>36</v>
      </c>
      <c r="F148" s="8">
        <v>30.1843561005522</v>
      </c>
      <c r="G148" s="9" />
    </row>
    <row r="149" spans="1:7" ht="15" customHeight="true">
      <c r="A149" s="3" t="s">
        <v>94</v>
      </c>
      <c r="B149" s="4" t="s">
        <v>110</v>
      </c>
      <c r="C149" s="7" t="s">
        <v>112</v>
      </c>
      <c r="D149" s="7" t="s">
        <v>35</v>
      </c>
      <c r="E149" s="7" t="s">
        <v>36</v>
      </c>
      <c r="F149" s="8">
        <v>31.3018897630313</v>
      </c>
      <c r="G149" s="9" />
    </row>
    <row r="150" spans="1:7" ht="15" customHeight="true">
      <c r="A150" s="3" t="s">
        <v>95</v>
      </c>
      <c r="B150" s="4" t="s">
        <v>110</v>
      </c>
      <c r="C150" s="7" t="s">
        <v>112</v>
      </c>
      <c r="D150" s="7" t="s">
        <v>35</v>
      </c>
      <c r="E150" s="7" t="s">
        <v>36</v>
      </c>
      <c r="F150" s="8">
        <v>31.5269638500488</v>
      </c>
      <c r="G150" s="9" />
    </row>
    <row r="151" spans="1:7" ht="15" customHeight="true">
      <c r="A151" s="3" t="s">
        <v>96</v>
      </c>
      <c r="B151" s="4" t="s">
        <v>110</v>
      </c>
      <c r="C151" s="7" t="s">
        <v>112</v>
      </c>
      <c r="D151" s="7" t="s">
        <v>35</v>
      </c>
      <c r="E151" s="7" t="s">
        <v>36</v>
      </c>
      <c r="F151" s="8">
        <v>28.0790609000734</v>
      </c>
      <c r="G151" s="9" />
    </row>
    <row r="152" spans="1:7" ht="15" customHeight="true">
      <c r="A152" s="3" t="s">
        <v>97</v>
      </c>
      <c r="B152" s="4" t="s">
        <v>110</v>
      </c>
      <c r="C152" s="7" t="s">
        <v>112</v>
      </c>
      <c r="D152" s="7" t="s">
        <v>35</v>
      </c>
      <c r="E152" s="7" t="s">
        <v>36</v>
      </c>
      <c r="F152" s="8">
        <v>28.1147863149668</v>
      </c>
      <c r="G152" s="9" />
    </row>
    <row r="153" spans="1:7" ht="15" customHeight="true">
      <c r="A153" s="3" t="s">
        <v>126</v>
      </c>
      <c r="B153" s="4" t="s">
        <v>110</v>
      </c>
      <c r="C153" s="7" t="s">
        <v>114</v>
      </c>
      <c r="D153" s="7" t="s">
        <v>35</v>
      </c>
      <c r="E153" s="7" t="s">
        <v>36</v>
      </c>
      <c r="F153" s="8" />
      <c r="G153" s="9" />
    </row>
    <row r="154" spans="1:7" ht="15" customHeight="true">
      <c r="A154" s="3" t="s">
        <v>127</v>
      </c>
      <c r="B154" s="4" t="s">
        <v>110</v>
      </c>
      <c r="C154" s="7" t="s">
        <v>114</v>
      </c>
      <c r="D154" s="7" t="s">
        <v>35</v>
      </c>
      <c r="E154" s="7" t="s">
        <v>36</v>
      </c>
      <c r="F154" s="8" />
      <c r="G154" s="9" />
    </row>
    <row r="155" spans="1:7" ht="15" customHeight="true">
      <c r="A155" s="3" t="s">
        <v>128</v>
      </c>
      <c r="B155" s="4" t="s">
        <v>110</v>
      </c>
      <c r="C155" s="7" t="s">
        <v>114</v>
      </c>
      <c r="D155" s="7" t="s">
        <v>35</v>
      </c>
      <c r="E155" s="7" t="s">
        <v>36</v>
      </c>
      <c r="F155" s="8">
        <v>29.6441242962669</v>
      </c>
      <c r="G155" s="9" />
    </row>
    <row r="156" spans="1:7" ht="15" customHeight="true">
      <c r="A156" s="3" t="s">
        <v>129</v>
      </c>
      <c r="B156" s="4" t="s">
        <v>110</v>
      </c>
      <c r="C156" s="7" t="s">
        <v>114</v>
      </c>
      <c r="D156" s="7" t="s">
        <v>35</v>
      </c>
      <c r="E156" s="7" t="s">
        <v>36</v>
      </c>
      <c r="F156" s="8">
        <v>29.794158117556</v>
      </c>
      <c r="G156" s="9" />
    </row>
    <row r="157" spans="1:7" ht="15" customHeight="true">
      <c r="A157" s="3" t="s">
        <v>130</v>
      </c>
      <c r="B157" s="4" t="s">
        <v>110</v>
      </c>
      <c r="C157" s="7" t="s">
        <v>114</v>
      </c>
      <c r="D157" s="7" t="s">
        <v>35</v>
      </c>
      <c r="E157" s="7" t="s">
        <v>36</v>
      </c>
      <c r="F157" s="8">
        <v>30.6908587474412</v>
      </c>
      <c r="G157" s="9" />
    </row>
    <row r="158" spans="1:7" ht="15" customHeight="true">
      <c r="A158" s="3" t="s">
        <v>131</v>
      </c>
      <c r="B158" s="4" t="s">
        <v>110</v>
      </c>
      <c r="C158" s="7" t="s">
        <v>114</v>
      </c>
      <c r="D158" s="7" t="s">
        <v>35</v>
      </c>
      <c r="E158" s="7" t="s">
        <v>36</v>
      </c>
      <c r="F158" s="8">
        <v>30.7559012060891</v>
      </c>
      <c r="G158" s="9" />
    </row>
    <row r="159" spans="1:7" ht="15" customHeight="true">
      <c r="A159" s="3" t="s">
        <v>132</v>
      </c>
      <c r="B159" s="4" t="s">
        <v>110</v>
      </c>
      <c r="C159" s="7" t="s">
        <v>114</v>
      </c>
      <c r="D159" s="7" t="s">
        <v>35</v>
      </c>
      <c r="E159" s="7" t="s">
        <v>36</v>
      </c>
      <c r="F159" s="8">
        <v>31.7300310616533</v>
      </c>
      <c r="G159" s="9" />
    </row>
    <row r="160" spans="1:7" ht="15" customHeight="true">
      <c r="A160" s="3" t="s">
        <v>133</v>
      </c>
      <c r="B160" s="4" t="s">
        <v>110</v>
      </c>
      <c r="C160" s="7" t="s">
        <v>114</v>
      </c>
      <c r="D160" s="7" t="s">
        <v>35</v>
      </c>
      <c r="E160" s="7" t="s">
        <v>36</v>
      </c>
      <c r="F160" s="8">
        <v>32.0202734099297</v>
      </c>
      <c r="G160" s="9" />
    </row>
    <row r="161" spans="1:7" ht="15" customHeight="true">
      <c r="A161" s="3" t="s">
        <v>134</v>
      </c>
      <c r="B161" s="4" t="s">
        <v>110</v>
      </c>
      <c r="C161" s="7" t="s">
        <v>114</v>
      </c>
      <c r="D161" s="7" t="s">
        <v>35</v>
      </c>
      <c r="E161" s="7" t="s">
        <v>36</v>
      </c>
      <c r="F161" s="8">
        <v>29.3678798187293</v>
      </c>
      <c r="G161" s="9" />
    </row>
    <row r="162" spans="1:7" ht="15" customHeight="true">
      <c r="A162" s="3" t="s">
        <v>135</v>
      </c>
      <c r="B162" s="4" t="s">
        <v>110</v>
      </c>
      <c r="C162" s="7" t="s">
        <v>114</v>
      </c>
      <c r="D162" s="7" t="s">
        <v>35</v>
      </c>
      <c r="E162" s="7" t="s">
        <v>36</v>
      </c>
      <c r="F162" s="8">
        <v>29.5005723692552</v>
      </c>
      <c r="G162" s="9" />
    </row>
    <row r="163" spans="1:7" ht="15" customHeight="true">
      <c r="A163" s="3" t="s">
        <v>136</v>
      </c>
      <c r="B163" s="4" t="s">
        <v>110</v>
      </c>
      <c r="C163" s="7" t="s">
        <v>114</v>
      </c>
      <c r="D163" s="7" t="s">
        <v>35</v>
      </c>
      <c r="E163" s="7" t="s">
        <v>36</v>
      </c>
      <c r="F163" s="8">
        <v>41.2360400752106</v>
      </c>
      <c r="G163" s="9" />
    </row>
    <row r="164" spans="1:7" ht="15" customHeight="true">
      <c r="A164" s="3" t="s">
        <v>137</v>
      </c>
      <c r="B164" s="4" t="s">
        <v>110</v>
      </c>
      <c r="C164" s="7" t="s">
        <v>114</v>
      </c>
      <c r="D164" s="7" t="s">
        <v>35</v>
      </c>
      <c r="E164" s="7" t="s">
        <v>36</v>
      </c>
      <c r="F164" s="8">
        <v>43.5073768675909</v>
      </c>
      <c r="G164" s="9" />
    </row>
    <row r="165" spans="1:7" ht="15" customHeight="true">
      <c r="A165" s="3" t="s">
        <v>32</v>
      </c>
      <c r="B165" s="4" t="s">
        <v>138</v>
      </c>
      <c r="C165" s="7" t="s">
        <v>139</v>
      </c>
      <c r="D165" s="7" t="s">
        <v>35</v>
      </c>
      <c r="E165" s="7" t="s">
        <v>36</v>
      </c>
      <c r="F165" s="8">
        <v>21.5317663159498</v>
      </c>
      <c r="G165" s="9" />
    </row>
    <row r="166" spans="1:7" ht="15" customHeight="true">
      <c r="A166" s="3" t="s">
        <v>37</v>
      </c>
      <c r="B166" s="4" t="s">
        <v>138</v>
      </c>
      <c r="C166" s="7" t="s">
        <v>139</v>
      </c>
      <c r="D166" s="7" t="s">
        <v>35</v>
      </c>
      <c r="E166" s="7" t="s">
        <v>36</v>
      </c>
      <c r="F166" s="8">
        <v>21.5377507933427</v>
      </c>
      <c r="G166" s="9" />
    </row>
    <row r="167" spans="1:7" ht="15" customHeight="true">
      <c r="A167" s="3" t="s">
        <v>38</v>
      </c>
      <c r="B167" s="4" t="s">
        <v>138</v>
      </c>
      <c r="C167" s="7" t="s">
        <v>139</v>
      </c>
      <c r="D167" s="7" t="s">
        <v>35</v>
      </c>
      <c r="E167" s="7" t="s">
        <v>36</v>
      </c>
      <c r="F167" s="8">
        <v>23.1194859368513</v>
      </c>
      <c r="G167" s="9" />
    </row>
    <row r="168" spans="1:7" ht="15" customHeight="true">
      <c r="A168" s="3" t="s">
        <v>39</v>
      </c>
      <c r="B168" s="4" t="s">
        <v>138</v>
      </c>
      <c r="C168" s="7" t="s">
        <v>139</v>
      </c>
      <c r="D168" s="7" t="s">
        <v>35</v>
      </c>
      <c r="E168" s="7" t="s">
        <v>36</v>
      </c>
      <c r="F168" s="8">
        <v>23.0757285047006</v>
      </c>
      <c r="G168" s="9" />
    </row>
    <row r="169" spans="1:7" ht="15" customHeight="true">
      <c r="A169" s="3" t="s">
        <v>40</v>
      </c>
      <c r="B169" s="4" t="s">
        <v>138</v>
      </c>
      <c r="C169" s="7" t="s">
        <v>139</v>
      </c>
      <c r="D169" s="7" t="s">
        <v>35</v>
      </c>
      <c r="E169" s="7" t="s">
        <v>36</v>
      </c>
      <c r="F169" s="8">
        <v>22.1539557557651</v>
      </c>
      <c r="G169" s="9" />
    </row>
    <row r="170" spans="1:7" ht="15" customHeight="true">
      <c r="A170" s="3" t="s">
        <v>41</v>
      </c>
      <c r="B170" s="4" t="s">
        <v>138</v>
      </c>
      <c r="C170" s="7" t="s">
        <v>139</v>
      </c>
      <c r="D170" s="7" t="s">
        <v>35</v>
      </c>
      <c r="E170" s="7" t="s">
        <v>36</v>
      </c>
      <c r="F170" s="8">
        <v>22.080129863589</v>
      </c>
      <c r="G170" s="9" />
    </row>
    <row r="171" spans="1:7" ht="15" customHeight="true">
      <c r="A171" s="3" t="s">
        <v>42</v>
      </c>
      <c r="B171" s="4" t="s">
        <v>138</v>
      </c>
      <c r="C171" s="7" t="s">
        <v>139</v>
      </c>
      <c r="D171" s="7" t="s">
        <v>35</v>
      </c>
      <c r="E171" s="7" t="s">
        <v>36</v>
      </c>
      <c r="F171" s="8">
        <v>23.2753941529818</v>
      </c>
      <c r="G171" s="9" />
    </row>
    <row r="172" spans="1:7" ht="15" customHeight="true">
      <c r="A172" s="3" t="s">
        <v>43</v>
      </c>
      <c r="B172" s="4" t="s">
        <v>138</v>
      </c>
      <c r="C172" s="7" t="s">
        <v>139</v>
      </c>
      <c r="D172" s="7" t="s">
        <v>35</v>
      </c>
      <c r="E172" s="7" t="s">
        <v>36</v>
      </c>
      <c r="F172" s="8">
        <v>23.3064066688768</v>
      </c>
      <c r="G172" s="9" />
    </row>
    <row r="173" spans="1:7" ht="15" customHeight="true">
      <c r="A173" s="3" t="s">
        <v>44</v>
      </c>
      <c r="B173" s="4" t="s">
        <v>138</v>
      </c>
      <c r="C173" s="7" t="s">
        <v>139</v>
      </c>
      <c r="D173" s="7" t="s">
        <v>35</v>
      </c>
      <c r="E173" s="7" t="s">
        <v>36</v>
      </c>
      <c r="F173" s="8">
        <v>23.3104527087227</v>
      </c>
      <c r="G173" s="9" />
    </row>
    <row r="174" spans="1:7" ht="15" customHeight="true">
      <c r="A174" s="3" t="s">
        <v>45</v>
      </c>
      <c r="B174" s="4" t="s">
        <v>138</v>
      </c>
      <c r="C174" s="7" t="s">
        <v>139</v>
      </c>
      <c r="D174" s="7" t="s">
        <v>35</v>
      </c>
      <c r="E174" s="7" t="s">
        <v>36</v>
      </c>
      <c r="F174" s="8">
        <v>23.3259328330682</v>
      </c>
      <c r="G174" s="9" />
    </row>
    <row r="175" spans="1:7" ht="15" customHeight="true">
      <c r="A175" s="3" t="s">
        <v>46</v>
      </c>
      <c r="B175" s="4" t="s">
        <v>138</v>
      </c>
      <c r="C175" s="7" t="s">
        <v>139</v>
      </c>
      <c r="D175" s="7" t="s">
        <v>35</v>
      </c>
      <c r="E175" s="7" t="s">
        <v>36</v>
      </c>
      <c r="F175" s="8">
        <v>24.4051899511032</v>
      </c>
      <c r="G175" s="9" />
    </row>
    <row r="176" spans="1:7" ht="15" customHeight="true">
      <c r="A176" s="3" t="s">
        <v>47</v>
      </c>
      <c r="B176" s="4" t="s">
        <v>138</v>
      </c>
      <c r="C176" s="7" t="s">
        <v>139</v>
      </c>
      <c r="D176" s="7" t="s">
        <v>35</v>
      </c>
      <c r="E176" s="7" t="s">
        <v>36</v>
      </c>
      <c r="F176" s="8">
        <v>24.2832536602186</v>
      </c>
      <c r="G176" s="9" />
    </row>
    <row r="177" spans="1:7" ht="15" customHeight="true">
      <c r="A177" s="3" t="s">
        <v>48</v>
      </c>
      <c r="B177" s="4" t="s">
        <v>138</v>
      </c>
      <c r="C177" s="7" t="s">
        <v>140</v>
      </c>
      <c r="D177" s="7" t="s">
        <v>35</v>
      </c>
      <c r="E177" s="7" t="s">
        <v>36</v>
      </c>
      <c r="F177" s="8">
        <v>22.8890405969701</v>
      </c>
      <c r="G177" s="9" />
    </row>
    <row r="178" spans="1:7" ht="15" customHeight="true">
      <c r="A178" s="3" t="s">
        <v>50</v>
      </c>
      <c r="B178" s="4" t="s">
        <v>138</v>
      </c>
      <c r="C178" s="7" t="s">
        <v>140</v>
      </c>
      <c r="D178" s="7" t="s">
        <v>35</v>
      </c>
      <c r="E178" s="7" t="s">
        <v>36</v>
      </c>
      <c r="F178" s="8">
        <v>22.553475276522</v>
      </c>
      <c r="G178" s="9" />
    </row>
    <row r="179" spans="1:7" ht="15" customHeight="true">
      <c r="A179" s="3" t="s">
        <v>51</v>
      </c>
      <c r="B179" s="4" t="s">
        <v>138</v>
      </c>
      <c r="C179" s="7" t="s">
        <v>140</v>
      </c>
      <c r="D179" s="7" t="s">
        <v>35</v>
      </c>
      <c r="E179" s="7" t="s">
        <v>36</v>
      </c>
      <c r="F179" s="8">
        <v>23.5923117535225</v>
      </c>
      <c r="G179" s="9" />
    </row>
    <row r="180" spans="1:7" ht="15" customHeight="true">
      <c r="A180" s="3" t="s">
        <v>52</v>
      </c>
      <c r="B180" s="4" t="s">
        <v>138</v>
      </c>
      <c r="C180" s="7" t="s">
        <v>140</v>
      </c>
      <c r="D180" s="7" t="s">
        <v>35</v>
      </c>
      <c r="E180" s="7" t="s">
        <v>36</v>
      </c>
      <c r="F180" s="8">
        <v>23.5422912633916</v>
      </c>
      <c r="G180" s="9" />
    </row>
    <row r="181" spans="1:7" ht="15" customHeight="true">
      <c r="A181" s="3" t="s">
        <v>53</v>
      </c>
      <c r="B181" s="4" t="s">
        <v>138</v>
      </c>
      <c r="C181" s="7" t="s">
        <v>140</v>
      </c>
      <c r="D181" s="7" t="s">
        <v>35</v>
      </c>
      <c r="E181" s="7" t="s">
        <v>36</v>
      </c>
      <c r="F181" s="8">
        <v>23.0158562849466</v>
      </c>
      <c r="G181" s="9" />
    </row>
    <row r="182" spans="1:7" ht="15" customHeight="true">
      <c r="A182" s="3" t="s">
        <v>54</v>
      </c>
      <c r="B182" s="4" t="s">
        <v>138</v>
      </c>
      <c r="C182" s="7" t="s">
        <v>140</v>
      </c>
      <c r="D182" s="7" t="s">
        <v>35</v>
      </c>
      <c r="E182" s="7" t="s">
        <v>36</v>
      </c>
      <c r="F182" s="8">
        <v>22.9490009199136</v>
      </c>
      <c r="G182" s="9" />
    </row>
    <row r="183" spans="1:7" ht="15" customHeight="true">
      <c r="A183" s="3" t="s">
        <v>55</v>
      </c>
      <c r="B183" s="4" t="s">
        <v>138</v>
      </c>
      <c r="C183" s="7" t="s">
        <v>140</v>
      </c>
      <c r="D183" s="7" t="s">
        <v>35</v>
      </c>
      <c r="E183" s="7" t="s">
        <v>36</v>
      </c>
      <c r="F183" s="8">
        <v>22.7445206392899</v>
      </c>
      <c r="G183" s="9" />
    </row>
    <row r="184" spans="1:7" ht="15" customHeight="true">
      <c r="A184" s="3" t="s">
        <v>56</v>
      </c>
      <c r="B184" s="4" t="s">
        <v>138</v>
      </c>
      <c r="C184" s="7" t="s">
        <v>140</v>
      </c>
      <c r="D184" s="7" t="s">
        <v>35</v>
      </c>
      <c r="E184" s="7" t="s">
        <v>36</v>
      </c>
      <c r="F184" s="8">
        <v>23.0099041403694</v>
      </c>
      <c r="G184" s="9" />
    </row>
    <row r="185" spans="1:7" ht="15" customHeight="true">
      <c r="A185" s="3" t="s">
        <v>57</v>
      </c>
      <c r="B185" s="4" t="s">
        <v>138</v>
      </c>
      <c r="C185" s="7" t="s">
        <v>140</v>
      </c>
      <c r="D185" s="7" t="s">
        <v>35</v>
      </c>
      <c r="E185" s="7" t="s">
        <v>36</v>
      </c>
      <c r="F185" s="8">
        <v>23.6272169811327</v>
      </c>
      <c r="G185" s="9" />
    </row>
    <row r="186" spans="1:7" ht="15" customHeight="true">
      <c r="A186" s="3" t="s">
        <v>58</v>
      </c>
      <c r="B186" s="4" t="s">
        <v>138</v>
      </c>
      <c r="C186" s="7" t="s">
        <v>140</v>
      </c>
      <c r="D186" s="7" t="s">
        <v>35</v>
      </c>
      <c r="E186" s="7" t="s">
        <v>36</v>
      </c>
      <c r="F186" s="8">
        <v>23.6228070650563</v>
      </c>
      <c r="G186" s="9" />
    </row>
    <row r="187" spans="1:7" ht="15" customHeight="true">
      <c r="A187" s="3" t="s">
        <v>59</v>
      </c>
      <c r="B187" s="4" t="s">
        <v>138</v>
      </c>
      <c r="C187" s="7" t="s">
        <v>140</v>
      </c>
      <c r="D187" s="7" t="s">
        <v>35</v>
      </c>
      <c r="E187" s="7" t="s">
        <v>36</v>
      </c>
      <c r="F187" s="8">
        <v>23.0934752820026</v>
      </c>
      <c r="G187" s="9" />
    </row>
    <row r="188" spans="1:7" ht="15" customHeight="true">
      <c r="A188" s="3" t="s">
        <v>60</v>
      </c>
      <c r="B188" s="4" t="s">
        <v>138</v>
      </c>
      <c r="C188" s="7" t="s">
        <v>140</v>
      </c>
      <c r="D188" s="7" t="s">
        <v>35</v>
      </c>
      <c r="E188" s="7" t="s">
        <v>36</v>
      </c>
      <c r="F188" s="8">
        <v>23.2950866201921</v>
      </c>
      <c r="G188" s="9" />
    </row>
    <row r="189" spans="1:7" ht="15" customHeight="true">
      <c r="A189" s="3" t="s">
        <v>113</v>
      </c>
      <c r="B189" s="4" t="s">
        <v>138</v>
      </c>
      <c r="C189" s="7" t="s">
        <v>140</v>
      </c>
      <c r="D189" s="7" t="s">
        <v>35</v>
      </c>
      <c r="E189" s="7" t="s">
        <v>36</v>
      </c>
      <c r="F189" s="8">
        <v>22.8455991400949</v>
      </c>
      <c r="G189" s="9" />
    </row>
    <row r="190" spans="1:7" ht="15" customHeight="true">
      <c r="A190" s="3" t="s">
        <v>115</v>
      </c>
      <c r="B190" s="4" t="s">
        <v>138</v>
      </c>
      <c r="C190" s="7" t="s">
        <v>140</v>
      </c>
      <c r="D190" s="7" t="s">
        <v>35</v>
      </c>
      <c r="E190" s="7" t="s">
        <v>36</v>
      </c>
      <c r="F190" s="8">
        <v>22.3034816471472</v>
      </c>
      <c r="G190" s="9" />
    </row>
    <row r="191" spans="1:7" ht="15" customHeight="true">
      <c r="A191" s="3" t="s">
        <v>116</v>
      </c>
      <c r="B191" s="4" t="s">
        <v>138</v>
      </c>
      <c r="C191" s="7" t="s">
        <v>140</v>
      </c>
      <c r="D191" s="7" t="s">
        <v>35</v>
      </c>
      <c r="E191" s="7" t="s">
        <v>36</v>
      </c>
      <c r="F191" s="8">
        <v>23.4703880212433</v>
      </c>
      <c r="G191" s="9" />
    </row>
    <row r="192" spans="1:7" ht="15" customHeight="true">
      <c r="A192" s="3" t="s">
        <v>117</v>
      </c>
      <c r="B192" s="4" t="s">
        <v>138</v>
      </c>
      <c r="C192" s="7" t="s">
        <v>140</v>
      </c>
      <c r="D192" s="7" t="s">
        <v>35</v>
      </c>
      <c r="E192" s="7" t="s">
        <v>36</v>
      </c>
      <c r="F192" s="8">
        <v>23.5907606324413</v>
      </c>
      <c r="G192" s="9" />
    </row>
    <row r="193" spans="1:7" ht="15" customHeight="true">
      <c r="A193" s="3" t="s">
        <v>118</v>
      </c>
      <c r="B193" s="4" t="s">
        <v>138</v>
      </c>
      <c r="C193" s="7" t="s">
        <v>140</v>
      </c>
      <c r="D193" s="7" t="s">
        <v>35</v>
      </c>
      <c r="E193" s="7" t="s">
        <v>36</v>
      </c>
      <c r="F193" s="8">
        <v>23.1288852829128</v>
      </c>
      <c r="G193" s="9" />
    </row>
    <row r="194" spans="1:7" ht="15" customHeight="true">
      <c r="A194" s="3" t="s">
        <v>119</v>
      </c>
      <c r="B194" s="4" t="s">
        <v>138</v>
      </c>
      <c r="C194" s="7" t="s">
        <v>140</v>
      </c>
      <c r="D194" s="7" t="s">
        <v>35</v>
      </c>
      <c r="E194" s="7" t="s">
        <v>36</v>
      </c>
      <c r="F194" s="8">
        <v>22.8726891326703</v>
      </c>
      <c r="G194" s="9" />
    </row>
    <row r="195" spans="1:7" ht="15" customHeight="true">
      <c r="A195" s="3" t="s">
        <v>120</v>
      </c>
      <c r="B195" s="4" t="s">
        <v>138</v>
      </c>
      <c r="C195" s="7" t="s">
        <v>140</v>
      </c>
      <c r="D195" s="7" t="s">
        <v>35</v>
      </c>
      <c r="E195" s="7" t="s">
        <v>36</v>
      </c>
      <c r="F195" s="8">
        <v>22.6563977819958</v>
      </c>
      <c r="G195" s="9" />
    </row>
    <row r="196" spans="1:7" ht="15" customHeight="true">
      <c r="A196" s="3" t="s">
        <v>121</v>
      </c>
      <c r="B196" s="4" t="s">
        <v>138</v>
      </c>
      <c r="C196" s="7" t="s">
        <v>140</v>
      </c>
      <c r="D196" s="7" t="s">
        <v>35</v>
      </c>
      <c r="E196" s="7" t="s">
        <v>36</v>
      </c>
      <c r="F196" s="8">
        <v>22.6735108563918</v>
      </c>
      <c r="G196" s="9" />
    </row>
    <row r="197" spans="1:7" ht="15" customHeight="true">
      <c r="A197" s="3" t="s">
        <v>122</v>
      </c>
      <c r="B197" s="4" t="s">
        <v>138</v>
      </c>
      <c r="C197" s="7" t="s">
        <v>140</v>
      </c>
      <c r="D197" s="7" t="s">
        <v>35</v>
      </c>
      <c r="E197" s="7" t="s">
        <v>36</v>
      </c>
      <c r="F197" s="8">
        <v>23.7019955374914</v>
      </c>
      <c r="G197" s="9" />
    </row>
    <row r="198" spans="1:7" ht="15" customHeight="true">
      <c r="A198" s="3" t="s">
        <v>123</v>
      </c>
      <c r="B198" s="4" t="s">
        <v>138</v>
      </c>
      <c r="C198" s="7" t="s">
        <v>140</v>
      </c>
      <c r="D198" s="7" t="s">
        <v>35</v>
      </c>
      <c r="E198" s="7" t="s">
        <v>36</v>
      </c>
      <c r="F198" s="8">
        <v>23.7557677558746</v>
      </c>
      <c r="G198" s="9" />
    </row>
    <row r="199" spans="1:7" ht="15" customHeight="true">
      <c r="A199" s="3" t="s">
        <v>124</v>
      </c>
      <c r="B199" s="4" t="s">
        <v>138</v>
      </c>
      <c r="C199" s="7" t="s">
        <v>140</v>
      </c>
      <c r="D199" s="7" t="s">
        <v>35</v>
      </c>
      <c r="E199" s="7" t="s">
        <v>36</v>
      </c>
      <c r="F199" s="8">
        <v>23.1777902607297</v>
      </c>
      <c r="G199" s="9" />
    </row>
    <row r="200" spans="1:7" ht="15" customHeight="true">
      <c r="A200" s="3" t="s">
        <v>125</v>
      </c>
      <c r="B200" s="4" t="s">
        <v>138</v>
      </c>
      <c r="C200" s="7" t="s">
        <v>140</v>
      </c>
      <c r="D200" s="7" t="s">
        <v>35</v>
      </c>
      <c r="E200" s="7" t="s">
        <v>36</v>
      </c>
      <c r="F200" s="8">
        <v>23.1133045951974</v>
      </c>
      <c r="G200" s="9" />
    </row>
    <row r="201" spans="1:7" ht="15" customHeight="true">
      <c r="A201" s="3" t="s">
        <v>61</v>
      </c>
      <c r="B201" s="4" t="s">
        <v>138</v>
      </c>
      <c r="C201" s="7" t="s">
        <v>140</v>
      </c>
      <c r="D201" s="7" t="s">
        <v>35</v>
      </c>
      <c r="E201" s="7" t="s">
        <v>36</v>
      </c>
      <c r="F201" s="8">
        <v>22.6104639839381</v>
      </c>
      <c r="G201" s="9" />
    </row>
    <row r="202" spans="1:7" ht="15" customHeight="true">
      <c r="A202" s="3" t="s">
        <v>63</v>
      </c>
      <c r="B202" s="4" t="s">
        <v>138</v>
      </c>
      <c r="C202" s="7" t="s">
        <v>140</v>
      </c>
      <c r="D202" s="7" t="s">
        <v>35</v>
      </c>
      <c r="E202" s="7" t="s">
        <v>36</v>
      </c>
      <c r="F202" s="8">
        <v>22.5855971345813</v>
      </c>
      <c r="G202" s="9" />
    </row>
    <row r="203" spans="1:7" ht="15" customHeight="true">
      <c r="A203" s="3" t="s">
        <v>64</v>
      </c>
      <c r="B203" s="4" t="s">
        <v>138</v>
      </c>
      <c r="C203" s="7" t="s">
        <v>140</v>
      </c>
      <c r="D203" s="7" t="s">
        <v>35</v>
      </c>
      <c r="E203" s="7" t="s">
        <v>36</v>
      </c>
      <c r="F203" s="8">
        <v>23.5306709719428</v>
      </c>
      <c r="G203" s="9" />
    </row>
    <row r="204" spans="1:7" ht="15" customHeight="true">
      <c r="A204" s="3" t="s">
        <v>65</v>
      </c>
      <c r="B204" s="4" t="s">
        <v>138</v>
      </c>
      <c r="C204" s="7" t="s">
        <v>140</v>
      </c>
      <c r="D204" s="7" t="s">
        <v>35</v>
      </c>
      <c r="E204" s="7" t="s">
        <v>36</v>
      </c>
      <c r="F204" s="8">
        <v>23.5882945962326</v>
      </c>
      <c r="G204" s="9" />
    </row>
    <row r="205" spans="1:7" ht="15" customHeight="true">
      <c r="A205" s="3" t="s">
        <v>66</v>
      </c>
      <c r="B205" s="4" t="s">
        <v>138</v>
      </c>
      <c r="C205" s="7" t="s">
        <v>140</v>
      </c>
      <c r="D205" s="7" t="s">
        <v>35</v>
      </c>
      <c r="E205" s="7" t="s">
        <v>36</v>
      </c>
      <c r="F205" s="8">
        <v>23.1804942107131</v>
      </c>
      <c r="G205" s="9" />
    </row>
    <row r="206" spans="1:7" ht="15" customHeight="true">
      <c r="A206" s="3" t="s">
        <v>67</v>
      </c>
      <c r="B206" s="4" t="s">
        <v>138</v>
      </c>
      <c r="C206" s="7" t="s">
        <v>140</v>
      </c>
      <c r="D206" s="7" t="s">
        <v>35</v>
      </c>
      <c r="E206" s="7" t="s">
        <v>36</v>
      </c>
      <c r="F206" s="8">
        <v>23.1199984308357</v>
      </c>
      <c r="G206" s="9" />
    </row>
    <row r="207" spans="1:7" ht="15" customHeight="true">
      <c r="A207" s="3" t="s">
        <v>68</v>
      </c>
      <c r="B207" s="4" t="s">
        <v>138</v>
      </c>
      <c r="C207" s="7" t="s">
        <v>140</v>
      </c>
      <c r="D207" s="7" t="s">
        <v>35</v>
      </c>
      <c r="E207" s="7" t="s">
        <v>36</v>
      </c>
      <c r="F207" s="8">
        <v>22.6925012953783</v>
      </c>
      <c r="G207" s="9" />
    </row>
    <row r="208" spans="1:7" ht="15" customHeight="true">
      <c r="A208" s="3" t="s">
        <v>69</v>
      </c>
      <c r="B208" s="4" t="s">
        <v>138</v>
      </c>
      <c r="C208" s="7" t="s">
        <v>140</v>
      </c>
      <c r="D208" s="7" t="s">
        <v>35</v>
      </c>
      <c r="E208" s="7" t="s">
        <v>36</v>
      </c>
      <c r="F208" s="8">
        <v>22.7532153922386</v>
      </c>
      <c r="G208" s="9" />
    </row>
    <row r="209" spans="1:7" ht="15" customHeight="true">
      <c r="A209" s="3" t="s">
        <v>70</v>
      </c>
      <c r="B209" s="4" t="s">
        <v>138</v>
      </c>
      <c r="C209" s="7" t="s">
        <v>140</v>
      </c>
      <c r="D209" s="7" t="s">
        <v>35</v>
      </c>
      <c r="E209" s="7" t="s">
        <v>36</v>
      </c>
      <c r="F209" s="8">
        <v>23.6145567618146</v>
      </c>
      <c r="G209" s="9" />
    </row>
    <row r="210" spans="1:7" ht="15" customHeight="true">
      <c r="A210" s="3" t="s">
        <v>71</v>
      </c>
      <c r="B210" s="4" t="s">
        <v>138</v>
      </c>
      <c r="C210" s="7" t="s">
        <v>140</v>
      </c>
      <c r="D210" s="7" t="s">
        <v>35</v>
      </c>
      <c r="E210" s="7" t="s">
        <v>36</v>
      </c>
      <c r="F210" s="8">
        <v>23.8916836712359</v>
      </c>
      <c r="G210" s="9" />
    </row>
    <row r="211" spans="1:7" ht="15" customHeight="true">
      <c r="A211" s="3" t="s">
        <v>72</v>
      </c>
      <c r="B211" s="4" t="s">
        <v>138</v>
      </c>
      <c r="C211" s="7" t="s">
        <v>140</v>
      </c>
      <c r="D211" s="7" t="s">
        <v>35</v>
      </c>
      <c r="E211" s="7" t="s">
        <v>36</v>
      </c>
      <c r="F211" s="8">
        <v>23.2184366373921</v>
      </c>
      <c r="G211" s="9" />
    </row>
    <row r="212" spans="1:7" ht="15" customHeight="true">
      <c r="A212" s="3" t="s">
        <v>73</v>
      </c>
      <c r="B212" s="4" t="s">
        <v>138</v>
      </c>
      <c r="C212" s="7" t="s">
        <v>140</v>
      </c>
      <c r="D212" s="7" t="s">
        <v>35</v>
      </c>
      <c r="E212" s="7" t="s">
        <v>36</v>
      </c>
      <c r="F212" s="8">
        <v>23.0992712112368</v>
      </c>
      <c r="G212" s="9" />
    </row>
    <row r="213" spans="1:7" ht="15" customHeight="true">
      <c r="A213" s="3" t="s">
        <v>74</v>
      </c>
      <c r="B213" s="4" t="s">
        <v>138</v>
      </c>
      <c r="C213" s="7" t="s">
        <v>139</v>
      </c>
      <c r="D213" s="7" t="s">
        <v>35</v>
      </c>
      <c r="E213" s="7" t="s">
        <v>36</v>
      </c>
      <c r="F213" s="8">
        <v>25.2040555751152</v>
      </c>
      <c r="G213" s="9" />
    </row>
    <row r="214" spans="1:7" ht="15" customHeight="true">
      <c r="A214" s="3" t="s">
        <v>75</v>
      </c>
      <c r="B214" s="4" t="s">
        <v>138</v>
      </c>
      <c r="C214" s="7" t="s">
        <v>139</v>
      </c>
      <c r="D214" s="7" t="s">
        <v>35</v>
      </c>
      <c r="E214" s="7" t="s">
        <v>36</v>
      </c>
      <c r="F214" s="8">
        <v>25.1592692242659</v>
      </c>
      <c r="G214" s="9" />
    </row>
    <row r="215" spans="1:7" ht="15" customHeight="true">
      <c r="A215" s="3" t="s">
        <v>76</v>
      </c>
      <c r="B215" s="4" t="s">
        <v>138</v>
      </c>
      <c r="C215" s="7" t="s">
        <v>139</v>
      </c>
      <c r="D215" s="7" t="s">
        <v>35</v>
      </c>
      <c r="E215" s="7" t="s">
        <v>36</v>
      </c>
      <c r="F215" s="8">
        <v>22.9438545083249</v>
      </c>
      <c r="G215" s="9" />
    </row>
    <row r="216" spans="1:7" ht="15" customHeight="true">
      <c r="A216" s="3" t="s">
        <v>77</v>
      </c>
      <c r="B216" s="4" t="s">
        <v>138</v>
      </c>
      <c r="C216" s="7" t="s">
        <v>139</v>
      </c>
      <c r="D216" s="7" t="s">
        <v>35</v>
      </c>
      <c r="E216" s="7" t="s">
        <v>36</v>
      </c>
      <c r="F216" s="8">
        <v>22.9170357340357</v>
      </c>
      <c r="G216" s="9" />
    </row>
    <row r="217" spans="1:7" ht="15" customHeight="true">
      <c r="A217" s="3" t="s">
        <v>78</v>
      </c>
      <c r="B217" s="4" t="s">
        <v>138</v>
      </c>
      <c r="C217" s="7" t="s">
        <v>139</v>
      </c>
      <c r="D217" s="7" t="s">
        <v>35</v>
      </c>
      <c r="E217" s="7" t="s">
        <v>36</v>
      </c>
      <c r="F217" s="8">
        <v>24.7266132557173</v>
      </c>
      <c r="G217" s="9" />
    </row>
    <row r="218" spans="1:7" ht="15" customHeight="true">
      <c r="A218" s="3" t="s">
        <v>79</v>
      </c>
      <c r="B218" s="4" t="s">
        <v>138</v>
      </c>
      <c r="C218" s="7" t="s">
        <v>139</v>
      </c>
      <c r="D218" s="7" t="s">
        <v>35</v>
      </c>
      <c r="E218" s="7" t="s">
        <v>36</v>
      </c>
      <c r="F218" s="8">
        <v>24.6741978947137</v>
      </c>
      <c r="G218" s="9" />
    </row>
    <row r="219" spans="1:7" ht="15" customHeight="true">
      <c r="A219" s="3" t="s">
        <v>80</v>
      </c>
      <c r="B219" s="4" t="s">
        <v>138</v>
      </c>
      <c r="C219" s="7" t="s">
        <v>139</v>
      </c>
      <c r="D219" s="7" t="s">
        <v>35</v>
      </c>
      <c r="E219" s="7" t="s">
        <v>36</v>
      </c>
      <c r="F219" s="8">
        <v>24.8930733478957</v>
      </c>
      <c r="G219" s="9" />
    </row>
    <row r="220" spans="1:7" ht="15" customHeight="true">
      <c r="A220" s="3" t="s">
        <v>81</v>
      </c>
      <c r="B220" s="4" t="s">
        <v>138</v>
      </c>
      <c r="C220" s="7" t="s">
        <v>139</v>
      </c>
      <c r="D220" s="7" t="s">
        <v>35</v>
      </c>
      <c r="E220" s="7" t="s">
        <v>36</v>
      </c>
      <c r="F220" s="8">
        <v>25.032863171281</v>
      </c>
      <c r="G220" s="9" />
    </row>
    <row r="221" spans="1:7" ht="15" customHeight="true">
      <c r="A221" s="3" t="s">
        <v>82</v>
      </c>
      <c r="B221" s="4" t="s">
        <v>138</v>
      </c>
      <c r="C221" s="7" t="s">
        <v>139</v>
      </c>
      <c r="D221" s="7" t="s">
        <v>35</v>
      </c>
      <c r="E221" s="7" t="s">
        <v>36</v>
      </c>
      <c r="F221" s="8">
        <v>25.532743448507</v>
      </c>
      <c r="G221" s="9" />
    </row>
    <row r="222" spans="1:7" ht="15" customHeight="true">
      <c r="A222" s="3" t="s">
        <v>83</v>
      </c>
      <c r="B222" s="4" t="s">
        <v>138</v>
      </c>
      <c r="C222" s="7" t="s">
        <v>139</v>
      </c>
      <c r="D222" s="7" t="s">
        <v>35</v>
      </c>
      <c r="E222" s="7" t="s">
        <v>36</v>
      </c>
      <c r="F222" s="8">
        <v>25.5405684921836</v>
      </c>
      <c r="G222" s="9" />
    </row>
    <row r="223" spans="1:7" ht="15" customHeight="true">
      <c r="A223" s="3" t="s">
        <v>84</v>
      </c>
      <c r="B223" s="4" t="s">
        <v>138</v>
      </c>
      <c r="C223" s="7" t="s">
        <v>139</v>
      </c>
      <c r="D223" s="7" t="s">
        <v>35</v>
      </c>
      <c r="E223" s="7" t="s">
        <v>36</v>
      </c>
      <c r="F223" s="8">
        <v>23.3955149063085</v>
      </c>
      <c r="G223" s="9" />
    </row>
    <row r="224" spans="1:7" ht="15" customHeight="true">
      <c r="A224" s="3" t="s">
        <v>85</v>
      </c>
      <c r="B224" s="4" t="s">
        <v>138</v>
      </c>
      <c r="C224" s="7" t="s">
        <v>139</v>
      </c>
      <c r="D224" s="7" t="s">
        <v>35</v>
      </c>
      <c r="E224" s="7" t="s">
        <v>36</v>
      </c>
      <c r="F224" s="8">
        <v>23.3562526757937</v>
      </c>
      <c r="G224" s="9" />
    </row>
    <row r="225" spans="1:7" ht="15" customHeight="true">
      <c r="A225" s="3" t="s">
        <v>86</v>
      </c>
      <c r="B225" s="4" t="s">
        <v>138</v>
      </c>
      <c r="C225" s="7" t="s">
        <v>140</v>
      </c>
      <c r="D225" s="7" t="s">
        <v>35</v>
      </c>
      <c r="E225" s="7" t="s">
        <v>36</v>
      </c>
      <c r="F225" s="8">
        <v>23.3729875290208</v>
      </c>
      <c r="G225" s="9" />
    </row>
    <row r="226" spans="1:7" ht="15" customHeight="true">
      <c r="A226" s="3" t="s">
        <v>87</v>
      </c>
      <c r="B226" s="4" t="s">
        <v>138</v>
      </c>
      <c r="C226" s="7" t="s">
        <v>140</v>
      </c>
      <c r="D226" s="7" t="s">
        <v>35</v>
      </c>
      <c r="E226" s="7" t="s">
        <v>36</v>
      </c>
      <c r="F226" s="8">
        <v>23.2137096984612</v>
      </c>
      <c r="G226" s="9" />
    </row>
    <row r="227" spans="1:7" ht="15" customHeight="true">
      <c r="A227" s="3" t="s">
        <v>88</v>
      </c>
      <c r="B227" s="4" t="s">
        <v>138</v>
      </c>
      <c r="C227" s="7" t="s">
        <v>140</v>
      </c>
      <c r="D227" s="7" t="s">
        <v>35</v>
      </c>
      <c r="E227" s="7" t="s">
        <v>36</v>
      </c>
      <c r="F227" s="8">
        <v>22.8785171116923</v>
      </c>
      <c r="G227" s="9" />
    </row>
    <row r="228" spans="1:7" ht="15" customHeight="true">
      <c r="A228" s="3" t="s">
        <v>89</v>
      </c>
      <c r="B228" s="4" t="s">
        <v>138</v>
      </c>
      <c r="C228" s="7" t="s">
        <v>140</v>
      </c>
      <c r="D228" s="7" t="s">
        <v>35</v>
      </c>
      <c r="E228" s="7" t="s">
        <v>36</v>
      </c>
      <c r="F228" s="8">
        <v>22.8961801153526</v>
      </c>
      <c r="G228" s="9" />
    </row>
    <row r="229" spans="1:7" ht="15" customHeight="true">
      <c r="A229" s="3" t="s">
        <v>90</v>
      </c>
      <c r="B229" s="4" t="s">
        <v>138</v>
      </c>
      <c r="C229" s="7" t="s">
        <v>140</v>
      </c>
      <c r="D229" s="7" t="s">
        <v>35</v>
      </c>
      <c r="E229" s="7" t="s">
        <v>36</v>
      </c>
      <c r="F229" s="8">
        <v>22.5904449354646</v>
      </c>
      <c r="G229" s="9" />
    </row>
    <row r="230" spans="1:7" ht="15" customHeight="true">
      <c r="A230" s="3" t="s">
        <v>91</v>
      </c>
      <c r="B230" s="4" t="s">
        <v>138</v>
      </c>
      <c r="C230" s="7" t="s">
        <v>140</v>
      </c>
      <c r="D230" s="7" t="s">
        <v>35</v>
      </c>
      <c r="E230" s="7" t="s">
        <v>36</v>
      </c>
      <c r="F230" s="8">
        <v>22.5190928670157</v>
      </c>
      <c r="G230" s="9" />
    </row>
    <row r="231" spans="1:7" ht="15" customHeight="true">
      <c r="A231" s="3" t="s">
        <v>92</v>
      </c>
      <c r="B231" s="4" t="s">
        <v>138</v>
      </c>
      <c r="C231" s="7" t="s">
        <v>140</v>
      </c>
      <c r="D231" s="7" t="s">
        <v>35</v>
      </c>
      <c r="E231" s="7" t="s">
        <v>36</v>
      </c>
      <c r="F231" s="8">
        <v>22.8310317614215</v>
      </c>
      <c r="G231" s="9" />
    </row>
    <row r="232" spans="1:7" ht="15" customHeight="true">
      <c r="A232" s="3" t="s">
        <v>93</v>
      </c>
      <c r="B232" s="4" t="s">
        <v>138</v>
      </c>
      <c r="C232" s="7" t="s">
        <v>140</v>
      </c>
      <c r="D232" s="7" t="s">
        <v>35</v>
      </c>
      <c r="E232" s="7" t="s">
        <v>36</v>
      </c>
      <c r="F232" s="8">
        <v>22.9631934152118</v>
      </c>
      <c r="G232" s="9" />
    </row>
    <row r="233" spans="1:7" ht="15" customHeight="true">
      <c r="A233" s="3" t="s">
        <v>94</v>
      </c>
      <c r="B233" s="4" t="s">
        <v>138</v>
      </c>
      <c r="C233" s="7" t="s">
        <v>140</v>
      </c>
      <c r="D233" s="7" t="s">
        <v>35</v>
      </c>
      <c r="E233" s="7" t="s">
        <v>36</v>
      </c>
      <c r="F233" s="8">
        <v>22.1456629515709</v>
      </c>
      <c r="G233" s="9" />
    </row>
    <row r="234" spans="1:7" ht="15" customHeight="true">
      <c r="A234" s="3" t="s">
        <v>95</v>
      </c>
      <c r="B234" s="4" t="s">
        <v>138</v>
      </c>
      <c r="C234" s="7" t="s">
        <v>140</v>
      </c>
      <c r="D234" s="7" t="s">
        <v>35</v>
      </c>
      <c r="E234" s="7" t="s">
        <v>36</v>
      </c>
      <c r="F234" s="8">
        <v>22.1013675480562</v>
      </c>
      <c r="G234" s="9" />
    </row>
    <row r="235" spans="1:7" ht="15" customHeight="true">
      <c r="A235" s="3" t="s">
        <v>96</v>
      </c>
      <c r="B235" s="4" t="s">
        <v>138</v>
      </c>
      <c r="C235" s="7" t="s">
        <v>140</v>
      </c>
      <c r="D235" s="7" t="s">
        <v>35</v>
      </c>
      <c r="E235" s="7" t="s">
        <v>36</v>
      </c>
      <c r="F235" s="8">
        <v>22.9481159346858</v>
      </c>
      <c r="G235" s="9" />
    </row>
    <row r="236" spans="1:7" ht="15" customHeight="true">
      <c r="A236" s="3" t="s">
        <v>97</v>
      </c>
      <c r="B236" s="4" t="s">
        <v>138</v>
      </c>
      <c r="C236" s="7" t="s">
        <v>140</v>
      </c>
      <c r="D236" s="7" t="s">
        <v>35</v>
      </c>
      <c r="E236" s="7" t="s">
        <v>36</v>
      </c>
      <c r="F236" s="8">
        <v>23.0965618310572</v>
      </c>
      <c r="G236" s="9" />
    </row>
    <row r="237" spans="1:7" ht="15" customHeight="true">
      <c r="A237" s="3" t="s">
        <v>126</v>
      </c>
      <c r="B237" s="4" t="s">
        <v>138</v>
      </c>
      <c r="C237" s="7" t="s">
        <v>140</v>
      </c>
      <c r="D237" s="7" t="s">
        <v>35</v>
      </c>
      <c r="E237" s="7" t="s">
        <v>36</v>
      </c>
      <c r="F237" s="8">
        <v>23.4440542396143</v>
      </c>
      <c r="G237" s="9" />
    </row>
    <row r="238" spans="1:7" ht="15" customHeight="true">
      <c r="A238" s="3" t="s">
        <v>127</v>
      </c>
      <c r="B238" s="4" t="s">
        <v>138</v>
      </c>
      <c r="C238" s="7" t="s">
        <v>140</v>
      </c>
      <c r="D238" s="7" t="s">
        <v>35</v>
      </c>
      <c r="E238" s="7" t="s">
        <v>36</v>
      </c>
      <c r="F238" s="8">
        <v>23.3865318004634</v>
      </c>
      <c r="G238" s="9" />
    </row>
    <row r="239" spans="1:7" ht="15" customHeight="true">
      <c r="A239" s="3" t="s">
        <v>128</v>
      </c>
      <c r="B239" s="4" t="s">
        <v>138</v>
      </c>
      <c r="C239" s="7" t="s">
        <v>140</v>
      </c>
      <c r="D239" s="7" t="s">
        <v>35</v>
      </c>
      <c r="E239" s="7" t="s">
        <v>36</v>
      </c>
      <c r="F239" s="8">
        <v>23.0467676486393</v>
      </c>
      <c r="G239" s="9" />
    </row>
    <row r="240" spans="1:7" ht="15" customHeight="true">
      <c r="A240" s="3" t="s">
        <v>129</v>
      </c>
      <c r="B240" s="4" t="s">
        <v>138</v>
      </c>
      <c r="C240" s="7" t="s">
        <v>140</v>
      </c>
      <c r="D240" s="7" t="s">
        <v>35</v>
      </c>
      <c r="E240" s="7" t="s">
        <v>36</v>
      </c>
      <c r="F240" s="8">
        <v>23.091035979975</v>
      </c>
      <c r="G240" s="9" />
    </row>
    <row r="241" spans="1:7" ht="15" customHeight="true">
      <c r="A241" s="3" t="s">
        <v>130</v>
      </c>
      <c r="B241" s="4" t="s">
        <v>138</v>
      </c>
      <c r="C241" s="7" t="s">
        <v>140</v>
      </c>
      <c r="D241" s="7" t="s">
        <v>35</v>
      </c>
      <c r="E241" s="7" t="s">
        <v>36</v>
      </c>
      <c r="F241" s="8">
        <v>22.8246479261708</v>
      </c>
      <c r="G241" s="9" />
    </row>
    <row r="242" spans="1:7" ht="15" customHeight="true">
      <c r="A242" s="3" t="s">
        <v>131</v>
      </c>
      <c r="B242" s="4" t="s">
        <v>138</v>
      </c>
      <c r="C242" s="7" t="s">
        <v>140</v>
      </c>
      <c r="D242" s="7" t="s">
        <v>35</v>
      </c>
      <c r="E242" s="7" t="s">
        <v>36</v>
      </c>
      <c r="F242" s="8">
        <v>22.8436801689237</v>
      </c>
      <c r="G242" s="9" />
    </row>
    <row r="243" spans="1:7" ht="15" customHeight="true">
      <c r="A243" s="3" t="s">
        <v>132</v>
      </c>
      <c r="B243" s="4" t="s">
        <v>138</v>
      </c>
      <c r="C243" s="7" t="s">
        <v>140</v>
      </c>
      <c r="D243" s="7" t="s">
        <v>35</v>
      </c>
      <c r="E243" s="7" t="s">
        <v>36</v>
      </c>
      <c r="F243" s="8">
        <v>23.1884853917047</v>
      </c>
      <c r="G243" s="9" />
    </row>
    <row r="244" spans="1:7" ht="15" customHeight="true">
      <c r="A244" s="3" t="s">
        <v>133</v>
      </c>
      <c r="B244" s="4" t="s">
        <v>138</v>
      </c>
      <c r="C244" s="7" t="s">
        <v>140</v>
      </c>
      <c r="D244" s="7" t="s">
        <v>35</v>
      </c>
      <c r="E244" s="7" t="s">
        <v>36</v>
      </c>
      <c r="F244" s="8">
        <v>23.2590137975806</v>
      </c>
      <c r="G244" s="9" />
    </row>
    <row r="245" spans="1:7" ht="15" customHeight="true">
      <c r="A245" s="3" t="s">
        <v>134</v>
      </c>
      <c r="B245" s="4" t="s">
        <v>138</v>
      </c>
      <c r="C245" s="7" t="s">
        <v>140</v>
      </c>
      <c r="D245" s="7" t="s">
        <v>35</v>
      </c>
      <c r="E245" s="7" t="s">
        <v>36</v>
      </c>
      <c r="F245" s="8">
        <v>22.213312045013</v>
      </c>
      <c r="G245" s="9" />
    </row>
    <row r="246" spans="1:7" ht="15" customHeight="true">
      <c r="A246" s="3" t="s">
        <v>135</v>
      </c>
      <c r="B246" s="4" t="s">
        <v>138</v>
      </c>
      <c r="C246" s="7" t="s">
        <v>140</v>
      </c>
      <c r="D246" s="7" t="s">
        <v>35</v>
      </c>
      <c r="E246" s="7" t="s">
        <v>36</v>
      </c>
      <c r="F246" s="8">
        <v>22.2619408748095</v>
      </c>
      <c r="G246" s="9" />
    </row>
    <row r="247" spans="1:7" ht="15" customHeight="true">
      <c r="A247" s="3" t="s">
        <v>136</v>
      </c>
      <c r="B247" s="4" t="s">
        <v>138</v>
      </c>
      <c r="C247" s="7" t="s">
        <v>140</v>
      </c>
      <c r="D247" s="7" t="s">
        <v>35</v>
      </c>
      <c r="E247" s="7" t="s">
        <v>36</v>
      </c>
      <c r="F247" s="8">
        <v>23.3074356643293</v>
      </c>
      <c r="G247" s="9" />
    </row>
    <row r="248" spans="1:7" ht="15" customHeight="true">
      <c r="A248" s="3" t="s">
        <v>137</v>
      </c>
      <c r="B248" s="4" t="s">
        <v>138</v>
      </c>
      <c r="C248" s="7" t="s">
        <v>140</v>
      </c>
      <c r="D248" s="7" t="s">
        <v>35</v>
      </c>
      <c r="E248" s="7" t="s">
        <v>36</v>
      </c>
      <c r="F248" s="8">
        <v>23.4492712981949</v>
      </c>
      <c r="G248" s="9" />
    </row>
    <row r="249" spans="1:7" ht="15" customHeight="true">
      <c r="A249" s="3" t="s">
        <v>98</v>
      </c>
      <c r="B249" s="4" t="s">
        <v>138</v>
      </c>
      <c r="C249" s="7" t="s">
        <v>140</v>
      </c>
      <c r="D249" s="7" t="s">
        <v>35</v>
      </c>
      <c r="E249" s="7" t="s">
        <v>36</v>
      </c>
      <c r="F249" s="8">
        <v>23.437576984817</v>
      </c>
      <c r="G249" s="9" />
    </row>
    <row r="250" spans="1:7" ht="15" customHeight="true">
      <c r="A250" s="3" t="s">
        <v>99</v>
      </c>
      <c r="B250" s="4" t="s">
        <v>138</v>
      </c>
      <c r="C250" s="7" t="s">
        <v>140</v>
      </c>
      <c r="D250" s="7" t="s">
        <v>35</v>
      </c>
      <c r="E250" s="7" t="s">
        <v>36</v>
      </c>
      <c r="F250" s="8">
        <v>23.3799065426154</v>
      </c>
      <c r="G250" s="9" />
    </row>
    <row r="251" spans="1:7" ht="15" customHeight="true">
      <c r="A251" s="3" t="s">
        <v>100</v>
      </c>
      <c r="B251" s="4" t="s">
        <v>138</v>
      </c>
      <c r="C251" s="7" t="s">
        <v>140</v>
      </c>
      <c r="D251" s="7" t="s">
        <v>35</v>
      </c>
      <c r="E251" s="7" t="s">
        <v>36</v>
      </c>
      <c r="F251" s="8">
        <v>23.0665303990027</v>
      </c>
      <c r="G251" s="9" />
    </row>
    <row r="252" spans="1:7" ht="15" customHeight="true">
      <c r="A252" s="3" t="s">
        <v>101</v>
      </c>
      <c r="B252" s="4" t="s">
        <v>138</v>
      </c>
      <c r="C252" s="7" t="s">
        <v>140</v>
      </c>
      <c r="D252" s="7" t="s">
        <v>35</v>
      </c>
      <c r="E252" s="7" t="s">
        <v>36</v>
      </c>
      <c r="F252" s="8">
        <v>23.2708644050573</v>
      </c>
      <c r="G252" s="9" />
    </row>
    <row r="253" spans="1:7" ht="15" customHeight="true">
      <c r="A253" s="3" t="s">
        <v>102</v>
      </c>
      <c r="B253" s="4" t="s">
        <v>138</v>
      </c>
      <c r="C253" s="7" t="s">
        <v>140</v>
      </c>
      <c r="D253" s="7" t="s">
        <v>35</v>
      </c>
      <c r="E253" s="7" t="s">
        <v>36</v>
      </c>
      <c r="F253" s="8">
        <v>23.1244271660638</v>
      </c>
      <c r="G253" s="9" />
    </row>
    <row r="254" spans="1:7" ht="15" customHeight="true">
      <c r="A254" s="3" t="s">
        <v>103</v>
      </c>
      <c r="B254" s="4" t="s">
        <v>138</v>
      </c>
      <c r="C254" s="7" t="s">
        <v>140</v>
      </c>
      <c r="D254" s="7" t="s">
        <v>35</v>
      </c>
      <c r="E254" s="7" t="s">
        <v>36</v>
      </c>
      <c r="F254" s="8">
        <v>23.0375718995229</v>
      </c>
      <c r="G254" s="9" />
    </row>
    <row r="255" spans="1:7" ht="15" customHeight="true">
      <c r="A255" s="3" t="s">
        <v>104</v>
      </c>
      <c r="B255" s="4" t="s">
        <v>138</v>
      </c>
      <c r="C255" s="7" t="s">
        <v>140</v>
      </c>
      <c r="D255" s="7" t="s">
        <v>35</v>
      </c>
      <c r="E255" s="7" t="s">
        <v>36</v>
      </c>
      <c r="F255" s="8">
        <v>23.3344161010953</v>
      </c>
      <c r="G255" s="9" />
    </row>
    <row r="256" spans="1:7" ht="15" customHeight="true">
      <c r="A256" s="3" t="s">
        <v>105</v>
      </c>
      <c r="B256" s="4" t="s">
        <v>138</v>
      </c>
      <c r="C256" s="7" t="s">
        <v>140</v>
      </c>
      <c r="D256" s="7" t="s">
        <v>35</v>
      </c>
      <c r="E256" s="7" t="s">
        <v>36</v>
      </c>
      <c r="F256" s="8">
        <v>23.4851991508844</v>
      </c>
      <c r="G256" s="9" />
    </row>
    <row r="257" spans="1:7" ht="15" customHeight="true">
      <c r="A257" s="3" t="s">
        <v>106</v>
      </c>
      <c r="B257" s="4" t="s">
        <v>138</v>
      </c>
      <c r="C257" s="7" t="s">
        <v>140</v>
      </c>
      <c r="D257" s="7" t="s">
        <v>35</v>
      </c>
      <c r="E257" s="7" t="s">
        <v>36</v>
      </c>
      <c r="F257" s="8">
        <v>22.4659885341382</v>
      </c>
      <c r="G257" s="9" />
    </row>
    <row r="258" spans="1:7" ht="15" customHeight="true">
      <c r="A258" s="3" t="s">
        <v>107</v>
      </c>
      <c r="B258" s="4" t="s">
        <v>138</v>
      </c>
      <c r="C258" s="7" t="s">
        <v>140</v>
      </c>
      <c r="D258" s="7" t="s">
        <v>35</v>
      </c>
      <c r="E258" s="7" t="s">
        <v>36</v>
      </c>
      <c r="F258" s="8">
        <v>22.4117956303505</v>
      </c>
      <c r="G258" s="9" />
    </row>
    <row r="259" spans="1:7" ht="15" customHeight="true">
      <c r="A259" s="3" t="s">
        <v>108</v>
      </c>
      <c r="B259" s="4" t="s">
        <v>138</v>
      </c>
      <c r="C259" s="7" t="s">
        <v>140</v>
      </c>
      <c r="D259" s="7" t="s">
        <v>35</v>
      </c>
      <c r="E259" s="7" t="s">
        <v>36</v>
      </c>
      <c r="F259" s="8">
        <v>23.0741626880604</v>
      </c>
      <c r="G259" s="9" />
    </row>
    <row r="260" spans="1:7" ht="15" customHeight="true">
      <c r="A260" s="3" t="s">
        <v>109</v>
      </c>
      <c r="B260" s="4" t="s">
        <v>138</v>
      </c>
      <c r="C260" s="7" t="s">
        <v>140</v>
      </c>
      <c r="D260" s="7" t="s">
        <v>35</v>
      </c>
      <c r="E260" s="7" t="s">
        <v>36</v>
      </c>
      <c r="F260" s="8">
        <v>23.374076525188</v>
      </c>
      <c r="G260" s="9" />
    </row>
  </sheetData>
  <printOptions headings="true" gridLines="true" />
  <pageMargins left="0" right="0" top="0" bottom="0" header="0" footer="0" />
  <pageSetup paperSize="0" scale="0" pageOrder="overThenDown" orientation="portrait" blackAndWhite="true" useFirstPageNumber="true" />
  <headerFooter />
</worksheet>
