# Supplementary material for: Loss of Schlafen3 influences the expression levels of Schlafen family members in ileum, thymus, and spleen tissue
Source: PeerJ. 2020 Jan 28;8:e8461. doi: 10.7717/peerj.8461 (PMC6993753; doi:10.7717/peerj.8461)
Supplement: Supplemental Information 17 [file peerj-08-8461-s017.xlsx]

## Sheet: 20190312_TSI SLFN FAM P6
File Name	20190312_TSI SLFN FAM P6.pcrd
Created By User
Notes
ID
Run Started	03/12/2019 22:42:02 UTC
Run Ended	03/12/2019 23:53:47 UTC
Sample Vol	20
Lid Temp	105
Protocol File Name	Unknown.prcl
Plate Setup File Name	DefaultPlate.pltd
Base Serial Number	CT031118
Optical Head Serial Number	785BR9482
CFX Manager Version	3.1.1517.0823.
Well group	All Wells
Amplification step	3
Melt step
Well	Fluor	Target	Sex Genotype	Content	Sample	Cq	Starting Quantity (SQ)	dCt	Ave. dCt			Male	Ave. dCt	5.68118
B01	FAM	Slfn1	F WT	95	IM	27.184	22.889	4.29491	4.43212			Slfn1	dCt	ddCt	Fold Change	Ave. Fold	Std dev	Ttest
B02	FAM	Slfn1			IM	27.1228	22.5535	4.56932			M WT	99	6.18699	0.50581	0.704265	1.30598	1.0077
B03	FAM	Slfn1	F KO	96	IM	29.0764	23.5923	5.48404	5.58815		M WT	7	5.50466	-0.176528	1.13016
B04	FAM	Slfn1			IM	29.2346	23.5423	5.69226			M WT	9	7.33633	1.65514	0.317507
B05	FAM	Slfn1	F WT	97	IM	27.5502	23.0159	4.53434	4.58936		M WT	17	5.26977	-0.411414	1.32999
B06	FAM	Slfn1			IM	27.5934	22.949	4.64439			M WT	20	5.4626	-0.218581	1.16359
B07	FAM	Slfn1	M KO	98	IM	28.2812	22.7445	5.53664	5.42556		M WT	32	7.23628	1.5551	0.340305
B08	FAM	Slfn1			IM	28.3244	23.0099	5.31448			M WT	42	3.95961	-1.72157	3.29796
B09	FAM	Slfn1	M WT	99	IM	29.8227	23.6272	6.19548	6.18699		M WT	49	4.3079	-1.37329	2.5906
B10	FAM	Slfn1			IM	29.8013	23.6228	6.17851			M WT	53	5.86652	0.185334	0.879446
B11	FAM	Slfn1	F KO	3	IM	29.5136	23.0935	6.42013	6.2373		M KO	98	5.42556	-0.255627	1.19385	1.66284	0.499175	0.477119
B12	FAM	Slfn1			IM	29.3496	23.2951	6.05448			M KO	18	5.23762	-0.443562	1.35996
F01	FAM	Slfn1	F KO	4	IM	31.0853	23.373	7.71233	7.70852		M KO	23	4.57004	-1.11115	2.16017
F02	FAM	Slfn1			IM	30.9184	23.2137	7.7047			M KO	24	5.24514	-0.436043	1.35289
F03	FAM	Slfn1	M WT	7	IM	28.3716	22.8785	5.4931	5.50466		M KO	46	4.51298	-1.1682	2.24731
F04	FAM	Slfn1			IM	28.4124	22.8962	5.51621
F07	FAM	Slfn1	M WT	9	IM	30.2825	22.831	7.45149	7.33633			Female	Ave. dCt	6.17984
F08	FAM	Slfn1			IM	30.1844	22.9632	7.22116				Slfn1	dCt	ddCt	Fold Change	Ave. Fold	Std dev	Ttest
F09	FAM	Slfn1	F WT	11	IM	31.3019	22.1457	9.15623	9.29091		F WT	95	4.43212	-1.74772	3.35828	1.64437	1.33578
F10	FAM	Slfn1			IM	31.527	22.1014	9.4256			F WT	97	4.58936	-1.59048	3.01149
F11	FAM	Slfn1	F KO	14	IM	28.0791	22.9481	5.13094	5.07458		F WT	11	9.29091	3.11107	0.115737
F12	FAM	Slfn1			IM	28.1148	23.0966	5.01822			F WT	16	6.07694	-0.1029	1.07393
B01	FAM	Slfn1	F WT	16	IM	29.5408	23.5219	6.0189	6.07694		F WT	21	5.79364	-0.386199	1.30695
B02	FAM	Slfn1			IM	29.4365	23.3015	6.13497			F WT	26	8.42514	2.2453	0.21091
B03	FAM	Slfn1	M WT	17	IM	27.0049	21.7541	5.25084	5.26977		F WT	27	6.3135	0.133662	0.911515
B04	FAM	Slfn1			IM	27.1216	21.8329	5.2887			F WT	45	4.5171	-1.66274	3.16617
B07	FAM	Slfn1	M KO	18	IM	28.4271	23.2194	5.20771	5.23762		F KO	96	5.58815	-0.591688	1.50701	2.47913	2.28504	0.39561
B08	FAM	Slfn1			IM	28.4512	23.1837	5.26753			F KO	3	6.2373	0.0574646	0.960951
B05	FAM	Slfn1	M WT	20	IM	28.244	22.7874	5.45654	5.4626		F KO	4	7.70852	1.52868	0.346594
B06	FAM	Slfn1			IM	28.2806	22.8119	5.46866			F KO	14	5.07458	-1.10525	2.15137
B09	FAM	Slfn1	F WT	21	IM	28.8591	23.1136	5.74557	5.79364		F KO	28	6.19169	0.0118533	0.991818
B10	FAM	Slfn1			IM	28.7971	22.9554	5.84171			F KO	43	3.80019	-2.37965	5.2041
B11	FAM	Slfn1	M KO	23	IM	27.4483	22.8915	4.55689	4.57004		F KO	59	3.54942	-2.63042	6.19207
B12	FAM	Slfn1			IM	27.6758	23.0926	4.58319
F01	FAM	Slfn1	M KO	24	IM	27.7087	22.5058	5.20292	5.24514
F02	FAM	Slfn1			IM	27.5948	22.3075	5.28736
F03	FAM	Slfn1	F WT	26	IM	31.673	23.3619	8.3111	8.42514
F04	FAM	Slfn1			IM	32.221	23.6818	8.53919
F05	FAM	Slfn1	F WT	27	IM	29.1508	22.7512	6.3996	6.3135
F06	FAM	Slfn1			IM	29.0128	22.7854	6.2274
F07	FAM	Slfn1	F KO	28	IM	30.0561	23.7583	6.29777	6.19169
F08	FAM	Slfn1			IM	30.096	24.0104	6.08561
F09	FAM	Slfn1	M WT	32	IM	30.5414	23.377	7.16434	7.23628
F10	FAM	Slfn1			IM	30.4951	23.1869	7.30822
B01	FAM	Slfn1	M WT	42	IM	27.736	23.9182	3.81772	3.95961
B02	FAM	Slfn1			IM	27.8434	23.7419	4.1015
B03	FAM	Slfn1	F KO	43	IM	27.6727	23.8902	3.78258	3.80019
B04	FAM	Slfn1			IM	27.6322	23.8144	3.8178
B05	FAM	Slfn1	F WT	45	IM	28.1636	23.5243	4.63938	4.5171
B06	FAM	Slfn1			IM	28.1496	23.7548	4.39483
F01	FAM	Slfn1	M KO	46	IM	28.6137	24.1351	4.47859	4.51298
F02	FAM	Slfn1			IM	28.3771	23.8298	4.54737
F03	FAM	Slfn1	M WT	49	IM	27.9729	23.6233	4.34967	4.3079
F04	FAM	Slfn1			IM	27.8152	23.5491	4.26613
B11	FAM	Slfn1	M WT	53	IM	28.5373	22.6564	5.88083	5.86652
B12	FAM	Slfn1			IM	28.6136	22.7614	5.85221
F05	FAM	Slfn1	F KO	59	IM	27.4583	23.8709	3.5874	3.54942
F06	FAM	Slfn1			IM	27.5627	24.0513	3.51144
A01	HEX	Slfn2	F WT	95	IM	21.5318	22.889	-1.35727	-1.1865			Male	Ave. dCt	0.381115
A02	HEX	Slfn2			IM	21.5378	22.5535	-1.01572				Slfn2	dCt	ddCt	Fold Change	Ave. Fold	Std dev	Ttest
A03	HEX	Slfn2	F KO	96	IM	23.1195	23.5923	-0.472826	-0.469694		M WT	99	-0.306819	-0.687934	1.61097	1.21351	0.61728
A04	HEX	Slfn2			IM	23.0757	23.5423	-0.466563			M WT	7	0.0430965	-0.338018	1.26402
A05	HEX	Slfn2	F WT	97	IM	22.154	23.0159	-0.861901	-0.865386		M WT	9	2.06586	1.68474	0.311059
A06	HEX	Slfn2			IM	22.0801	22.949	-0.868871			M WT	17	-0.152776	-0.53389	1.44783
A07	HEX	Slfn2	M KO	98	IM	23.2754	22.7445	0.530874	0.413688		M WT	20	0.0807859	-0.300329	1.23142
A08	HEX	Slfn2			IM	23.3064	23.0099	0.296503			M WT	32	2.44688	2.06577	0.238859
A09	HEX	Slfn2	M WT	99	IM	23.3105	23.6272	-0.316764	-0.306819		M WT	42	-0.775575	-1.15669	2.22945
A10	HEX	Slfn2			IM	23.3259	23.6228	-0.296874			M WT	49	-0.105738	-0.486853	1.40138
A11	HEX	Slfn2	F KO	3	IM	24.4052	23.0935	1.31171	1.14994		M WT	53	0.134316	-0.246798	1.18657
A12	HEX	Slfn2			IM	24.2833	23.2951	0.988167			M KO	98	0.413688	0.0325734	0.977675	1.14083	0.353647	0.814678
E01	HEX	Slfn2	F KO	4	IM	25.2041	23.373	1.83107	1.88831		M KO	18	0.689152	0.308037	0.80774
E02	HEX	Slfn2			IM	25.1593	23.2137	1.94556			M KO	23	-0.31305	-0.694165	1.61795
E03	HEX	Slfn2	M WT	7	IM	22.9439	22.8785	0.0653374	0.0430965		M KO	24	-0.114666	-0.495781	1.41008
E04	HEX	Slfn2			IM	22.917	22.8962	0.0208556			M KO	46	0.548082	0.166968	0.890713
E07	HEX	Slfn2	M WT	9	IM	24.8931	22.831	2.06204	2.06586
E08	HEX	Slfn2			IM	25.0329	22.9632	2.06967				Female	Ave. dCt	0.967896
E09	HEX	Slfn2	F WT	11	IM	25.5327	22.1457	3.38708	3.41314			Slfn2	dCt	ddCt	Fold Change	Ave. Fold	Std dev	Ttest
E10	HEX	Slfn2			IM	25.5406	22.1014	3.4392			F WT	95	-1.1865	-2.1544	4.45182	1.71877	1.66112
E11	HEX	Slfn2	F KO	14	IM	23.3955	22.9481	0.447399	0.353545		F WT	97	-0.865386	-1.83328	3.56347
E12	HEX	Slfn2			IM	23.3563	23.0966	0.259691			F WT	11	3.41314	2.44524	0.183615
A01	HEX	Slfn2	F WT	16	IM	25.0499	23.5219	1.52799	1.6272		F WT	16	1.6272	0.659304	0.633184
A02	HEX	Slfn2			IM	25.0279	23.3015	1.72641			F WT	21	0.897952	-0.0699438	1.04968
A03	HEX	Slfn2	M WT	17	IM	21.5941	21.7541	-0.159976	-0.152776		F WT	26	3.0392	2.0713	0.237945
A04	HEX	Slfn2			IM	21.6873	21.8329	-0.145576			F WT	27	1.37348	0.40558	0.754933
A07	HEX	Slfn2	M KO	18	IM	23.888	23.2194	0.66864	0.689152		F WT	45	-0.55591	-1.52381	2.87549
A08	HEX	Slfn2			IM	23.8933	23.1837	0.709665			F KO	96	-0.469694	-1.43759	2.70868	1.74313	1.08109	0.974109
A05	HEX	Slfn2	M WT	20	IM	22.8604	22.7874	0.0729401	0.0807859		F KO	3	1.14994	0.182045	0.881453
A06	HEX	Slfn2			IM	22.9005	22.8119	0.0886318			F KO	4	1.88831	0.920418	0.528356
A09	HEX	Slfn2	F WT	21	IM	23.9813	23.1136	0.867697	0.897952		F KO	14	0.353545	-0.614351	1.53087
A10	HEX	Slfn2			IM	23.8836	22.9554	0.928208			F KO	28	1.44316	0.475266	0.719334
A11	HEX	Slfn2	M KO	23	IM	22.7923	22.8915	-0.0991295	-0.31305		F KO	43	-0.533374	-1.50127	2.83092
A12	HEX	Slfn2			IM	22.5656	23.0926	-0.526971			F KO	59	-0.618187	-1.58608	3.00233
E01	HEX	Slfn2	M KO	24	IM	22.4257	22.5058	-0.0801045	-0.114666
E02	HEX	Slfn2			IM	22.1583	22.3075	-0.149228
E03	HEX	Slfn2	F WT	26	IM	26.6151	23.3619	3.25326	3.0392
E04	HEX	Slfn2			IM	26.507	23.6818	2.82513
E05	HEX	Slfn2	F WT	27	IM	24.176	22.7512	1.42482	1.37348
E06	HEX	Slfn2			IM	24.1075	22.7854	1.32213
E07	HEX	Slfn2	F KO	28	IM	25.3425	23.7583	1.58416	1.44316
E08	HEX	Slfn2			IM	25.3126	24.0104	1.30217
E09	HEX	Slfn2	M WT	32	IM	25.8027	23.377	2.42566	2.44688
E10	HEX	Slfn2			IM	25.655	23.1869	2.46811
A01	HEX	Slfn2	M WT	42	IM	23.0204	23.9182	-0.897832	-0.775575
A02	HEX	Slfn2			IM	23.0886	23.7419	-0.653318
A03	HEX	Slfn2	F KO	43	IM	23.283	23.8902	-0.607194	-0.533374
A04	HEX	Slfn2			IM	23.3548	23.8144	-0.459554
A05	HEX	Slfn2	F WT	45	IM	23.1376	23.5243	-0.386644	-0.55591
A06	HEX	Slfn2			IM	23.0296	23.7548	-0.725177
E01	HEX	Slfn2	M KO	46	IM	24.6232	24.1351	0.488112	0.548082
E02	HEX	Slfn2			IM	24.4378	23.8298	0.608052
E03	HEX	Slfn2	M WT	49	IM	23.4384	23.6233	-0.184891	-0.105738
E04	HEX	Slfn2			IM	23.5225	23.5491	-0.0265852
A11	HEX	Slfn2	M WT	53	IM	22.9253	22.6564	0.268916	0.134316
A12	HEX	Slfn2			IM	22.7611	22.7614	-0.000284185
E05	HEX	Slfn2	F KO	59	IM	23.2741	23.8709	-0.596746	-0.618187
E06	HEX	Slfn2			IM	23.4117	24.0513	-0.639629
C01	FAM	Slfn3	F WT	95	IM	28.2935	22.8456	5.44788	5.64368			Male	Ave. dCt	6.37438
C02	FAM	Slfn3			IM	28.143	22.3035	5.83948				Slfn3	dCt	ddCt	Fold Change	Ave. Fold	Std dev	Ttest
C03	FAM	Slfn3	F KO	96	IM	48.4542	23.4704	24.9838	25.6965		M WT	99	8.29187	1.9175	0.264714	1.3544	1.02558
C04	FAM	Slfn3			IM	50	23.5908	26.4092			M WT	7	6.65024	0.275864	0.825956
C05	FAM	Slfn3	F WT	97	IM	28.3608	23.1289	5.23194	5.21111		M WT	9	8.6514	2.27703	0.206322
C06	FAM	Slfn3			IM	28.063	22.8727	5.19028			M WT	17	5.69334	-0.68104	1.6033
C07	FAM	Slfn3	M KO	98	IM	41.8682	22.6564	19.2118	17.7945		M WT	20	6.12938	-0.244999	1.18509
C08	FAM	Slfn3			IM	39.0506	22.6735	16.3771			M WT	32	5.69394	-0.680439	1.60263
C09	FAM	Slfn3	M WT	99	IM	31.9682	23.702	8.26621	8.29187		M WT	42	4.4893	-1.88507	3.69371
C10	FAM	Slfn3			IM	32.0733	23.7558	8.31753			M WT	49	5.89676	-0.477612	1.39244
C11	FAM	Slfn3	F KO	3	IM	50	23.1778	26.8222	21.5479		M WT	53	5.87315	-0.501228	1.41542
C12	FAM	Slfn3			IM	39.3869	23.1133	16.2736			M KO	98	17.7945	11.4201	0.000364931	0.00231705	0.00316507	0.0134555
G01	FAM	Slfn3	F KO	4	IM	50	23.4441	26.5559	26.5847		M KO	18	18.2947	11.9203	0.000258001
G02	FAM	Slfn3			IM	50	23.3865	26.6135			M KO	23	13.47	7.09562	0.00731151
G03	FAM	Slfn3	M WT	7	IM	29.6441	23.0468	6.59736	6.65024		M KO	24	23.0003	16.6259	9.88801e-06
G04	FAM	Slfn3			IM	29.7942	23.091	6.70312			M KO	46	14.4759	8.10148	0.00364092
G07	FAM	Slfn3	M WT	9	IM	31.73	23.1885	8.54155	8.6514
G08	FAM	Slfn3			IM	32.0203	23.259	8.76126				Female	Ave. dCt	6.16278
G09	FAM	Slfn3	F WT	11	IM	29.3679	22.2133	7.15457	7.1966			Slfn3	dCt	ddCt	Fold Change	Ave. Fold	Std dev	Ttest
G10	FAM	Slfn3			IM	29.5006	22.2619	7.23863			F WT	95	5.64368	-0.519103	1.43306	1.32286	0.974695
G11	FAM	Slfn3	F KO	14	IM	41.236	23.3074	17.9286	18.9934		F WT	97	5.21111	-0.951671	1.93411
G12	FAM	Slfn3			IM	43.5074	23.4493	20.0581			F WT	11	7.1966	1.03382	0.488415
C01	FAM	Slfn3	F WT	16	IM	30.3163	23.55	6.76633	6.77916		F WT	16	6.77916	0.616378	0.652306
C02	FAM	Slfn3			IM	30.2085	23.4165	6.79198			F WT	21	7.32357	1.16079	0.447268
C03	FAM	Slfn3	M WT	17	IM	27.3197	21.6133	5.70645	5.69334		F WT	26	7.61186	1.44908	0.366254
C04	FAM	Slfn3			IM	27.4773	21.7971	5.68022			F WT	27	4.71957	-1.44321	2.71925
C07	FAM	Slfn3	M KO	18	IM	43.4293	23.1204	20.3089	18.2947		F WT	45	4.81669	-1.34609	2.54222
C08	FAM	Slfn3			IM	39.5207	23.2402	16.2805			F KO	96	25.6965	19.5337	1.31752e-06	0.000571994	0.00107076	0.0034088
C05	FAM	Slfn3	M WT	20	IM	28.9158	22.7239	6.19182	6.12938		F KO	3	21.5479	15.3851	2.33678e-05
C06	FAM	Slfn3			IM	28.6922	22.6253	6.06693			F KO	4	26.5847	20.4219	7.11848e-07
C09	FAM	Slfn3	F WT	21	IM	30.533	23.1463	7.38661	7.32357		F KO	14	18.9934	12.8306	0.000137282
C10	FAM	Slfn3			IM	30.1876	22.927	7.26052			F KO	28	14.6027	8.43994	0.00287955
C11	FAM	Slfn3	M KO	23	IM	36.1275	22.9179	13.2096	13.47		F KO	43	20.9216	14.7589	3.60696e-05
C12	FAM	Slfn3			IM	36.8202	23.0898	13.7304			F KO	59	16.24	10.0772	0.00092566
G01	FAM	Slfn3	M KO	24	IM	45.4546	22.3967	23.0579	23.0003
G02	FAM	Slfn3			IM	45.2244	22.2818	22.9426
G03	FAM	Slfn3	F WT	26	IM	31.1993	23.523	7.67628	7.61186
G04	FAM	Slfn3			IM	31.2131	23.6656	7.54745
G05	FAM	Slfn3	F WT	27	IM	27.8355	23.1038	4.73177	4.71957
G06	FAM	Slfn3			IM	27.8814	23.174	4.70738
G07	FAM	Slfn3	F KO	28	IM	38.1464	24.0086	14.1378	14.6027
G08	FAM	Slfn3			IM	39.2246	24.157	15.0676
G09	FAM	Slfn3	M WT	32	IM	28.9606	23.1462	5.81437	5.69394
G10	FAM	Slfn3			IM	28.9918	23.4183	5.5735
C01	FAM	Slfn3	M WT	42	IM	28.3294	24.043	4.28633	4.4893
C02	FAM	Slfn3			IM	28.3642	23.6719	4.69228
C03	FAM	Slfn3	F KO	43	IM	40.6148	23.7959	16.8189	20.9216
C04	FAM	Slfn3			IM	48.6414	23.6171	25.0244
C05	FAM	Slfn3	F WT	45	IM	28.2884	23.5095	4.77885	4.81669
C06	FAM	Slfn3			IM	28.4324	23.5779	4.85453
G01	FAM	Slfn3	M KO	46	IM	37.1622	24.0782	13.084	14.4759
G02	FAM	Slfn3			IM	39.9871	24.1193	15.8677
G03	FAM	Slfn3	M WT	49	IM	29.8057	24.0195	5.78618	5.89676
G04	FAM	Slfn3			IM	29.7728	23.7654	6.00734
C11	FAM	Slfn3	M WT	53	IM	28.7048	22.8467	5.85807	5.87315
C12	FAM	Slfn3			IM	28.7322	22.8439	5.88823
G05	FAM	Slfn3	F KO	59	IM	39.5991	24.0397	15.5594	16.24
G06	FAM	Slfn3			IM	41.0748	24.1542	16.9206
D01	Cy5	Slfn4	F WT	95	IM	24.4532	22.6105	1.84273	1.81152			Male	Ave. dCt	1.56016
D02	Cy5	Slfn4			IM	24.3659	22.5856	1.78031				Slfn4	dCt	ddCt	Fold Change	Ave. Fold	Std dev	Ttest
D03	Cy5	Slfn4	F KO	96	IM	25.7164	23.5307	2.18573	2.18121		M WT	99	2.40148	0.84132	0.558132	1.26269	1.07493
D04	Cy5	Slfn4			IM	25.765	23.5883	2.1767			M WT	7	1.79739	0.237228	0.848374
D05	Cy5	Slfn4	F WT	97	IM	24.335	23.1805	1.15447	1.19721		M WT	9	2.56699	1.00683	0.49764
D06	Cy5	Slfn4			IM	24.3599	23.12	1.23995			M WT	17	1.65816	0.0979987	0.934328
D07	Cy5	Slfn4	M KO	98	IM	24.0527	22.6925	1.36022	1.35383		M WT	20	2.29097	0.730809	0.602566
D08	Cy5	Slfn4			IM	24.1007	22.7532	1.34743			M WT	32	2.05915	0.49899	0.707602
D09	Cy5	Slfn4	M WT	99	IM	26.1027	23.6146	2.48814	2.40148		M WT	42	1.06707	-0.493088	1.40745
D10	Cy5	Slfn4			IM	26.2065	23.8917	2.31482			M WT	49	-0.378681	-1.93884	3.83397
D11	Cy5	Slfn4	F KO	3	IM	25.1589	23.2184	1.94042	2.03762		M WT	53	0.578912	-0.981246	1.97417
D12	Cy5	Slfn4			IM	25.2341	23.0993	2.13483			M KO	98	1.35383	-0.206331	1.15375	1.01624	0.424234	0.636475
H01	Cy5	Slfn4	F KO	4	IM	25.5488	23.4376	2.11127	2.10016		M KO	18	2.33391	0.773747	0.584896
H02	Cy5	Slfn4			IM	25.469	23.3799	2.08905			M KO	23	2.12084	0.560678	0.677984
H03	Cy5	Slfn4	M WT	7	IM	24.9405	23.0665	1.87399	1.79739		M KO	24	1.538	-0.0221553	1.01548
H04	Cy5	Slfn4			IM	24.9916	23.2709	1.72078			M KO	46	0.838479	-0.72168	1.6491
H07	Cy5	Slfn4	M WT	9	IM	25.8881	23.3344	2.55373	2.56699
H08	Cy5	Slfn4			IM	26.0654	23.4852	2.58024				Female	Ave. dCt	1.74292
H09	Cy5	Slfn4	F WT	11	IM	24.8706	22.466	2.40462	2.4594			Slfn4	dCt	ddCt	Fold Change	Ave. Fold	Std dev	Ttest
H10	Cy5	Slfn4			IM	24.926	22.4118	2.51418			F WT	95	1.81152	0.068594	0.953567	1.10794	0.593176
H11	Cy5	Slfn4	F KO	14	IM	25.4682	23.0742	2.39403	2.28157		F WT	97	1.19721	-0.545717	1.45975
H12	Cy5	Slfn4			IM	25.5432	23.3741	2.16911			F WT	11	2.4594	0.716475	0.608583
D01	Cy5	Slfn4	F WT	16	IM	26.1235	23.7504	2.37314	2.46933		F WT	16	2.46933	0.726403	0.604409
D02	Cy5	Slfn4			IM	26.1071	23.5416	2.56551			F WT	21	1.54	-0.202923	1.15103
D03	Cy5	Slfn4	M WT	17	IM	23.4577	21.8536	1.60411	1.65816		F WT	26	1.86395	0.121029	0.919532
D04	Cy5	Slfn4			IM	23.4013	21.6891	1.71221			F WT	27	2.12011	0.377189	0.769937
D07	Cy5	Slfn4	M KO	18	IM	25.4715	23.2086	2.26293	2.33391		F WT	45	0.481875	-1.26105	2.3967
D08	Cy5	Slfn4			IM	25.4944	23.0895	2.40489			F KO	96	2.18121	0.43829	0.738009	1.30878	0.95603	0.627938
D05	Cy5	Slfn4	M WT	20	IM	24.9501	22.6784	2.27177	2.29097		F KO	3	2.03762	0.2947	0.815242
D06	Cy5	Slfn4			IM	25.0949	22.7847	2.31017			F KO	4	2.10016	0.357235	0.780659
D09	Cy5	Slfn4	F WT	21	IM	24.574	23.0785	1.49545	1.54		F KO	14	2.28157	0.538646	0.688416
D10	Cy5	Slfn4			IM	24.704	23.1195	1.58455			F KO	28	2.07871	0.335783	0.792354
D11	Cy5	Slfn4	M KO	23	IM	25.1733	23.015	2.15831	2.12084		F KO	43	0.533144	-1.20978	2.31302
D12	Cy5	Slfn4			IM	25.1758	23.0925	2.08337			F KO	59	0.141805	-1.60112	3.03378
H01	Cy5	Slfn4	M KO	24	IM	24.0529	22.5937	1.45914	1.538
H02	Cy5	Slfn4			IM	24.0412	22.4244	1.61687
H03	Cy5	Slfn4	F WT	26	IM	25.656	23.8748	1.78116	1.86395
H04	Cy5	Slfn4			IM	25.8467	23.8999	1.94674
H05	Cy5	Slfn4	F WT	27	IM	25.4021	23.2328	2.16931	2.12011
H06	Cy5	Slfn4			IM	25.2862	23.2153	2.07092
H07	Cy5	Slfn4	F KO	28	IM	26.2392	24.1482	2.09102	2.07871
H08	Cy5	Slfn4			IM	26.32	24.2536	2.0664
H09	Cy5	Slfn4	M WT	32	IM	25.6254	23.6233	2.00209	2.05915
H10	Cy5	Slfn4			IM	25.6847	23.5684	2.11621
D01	Cy5	Slfn4	M WT	42	IM	25.0268	24.0102	1.01666	1.06707
D02	Cy5	Slfn4			IM	24.9171	23.7996	1.11748
D03	Cy5	Slfn4	F KO	43	IM	24.2323	23.7158	0.516507	0.533144
D04	Cy5	Slfn4			IM	24.355	23.8052	0.54978
D05	Cy5	Slfn4	F WT	45	IM	24.3381	23.907	0.431143	0.481875
D06	Cy5	Slfn4			IM	24.2735	23.7409	0.532606
H01	Cy5	Slfn4	M KO	46	IM	25.2388	24.2852	0.953569	0.838479
H02	Cy5	Slfn4			IM	25.0809	24.3575	0.723389
H03	Cy5	Slfn4	M WT	49	IM	23.828	24.2024	-0.374415	-0.378681
H04	Cy5	Slfn4			IM	23.8996	24.2825	-0.382948
D11	Cy5	Slfn4	M WT	53	IM	23.6577	22.9885	0.669226	0.578912
D12	Cy5	Slfn4			IM	23.5137	23.0252	0.488599
H05	Cy5	Slfn4	F KO	59	IM	24.5312	24.3704	0.160794	0.141805
H06	Cy5	Slfn4			IM	24.5312	24.4084	0.122817
A01	Cy5	Slfn5	F WT	95	IM	27.0467	22.889	4.15768	4.34288			Male	Ave. dCt	5.1198
A02	Cy5	Slfn5			IM	27.0815	22.5535	4.52807				Slfn5	dCt	ddCt	Fold Change	Ave. Fold	Std dev	Ttest
A03	Cy5	Slfn5	F KO	96	IM	26.5963	23.5923	3.00397	2.994		M WT	99	5.1681	0.0482999	0.967075	1.21326	0.755167
A04	Cy5	Slfn5			IM	26.5263	23.5423	2.98402			M WT	7	5.10833	-0.0114645	1.00798
A05	Cy5	Slfn5	F WT	97	IM	27.1483	23.0159	4.13245	4.11177		M WT	9	6.01434	0.894543	0.537918
A06	Cy5	Slfn5			IM	27.0401	22.949	4.09109			M WT	17	4.58128	-0.538521	1.45248
A07	Cy5	Slfn5	M KO	98	IM	25.8396	22.7445	3.09508	2.99009		M WT	20	5.03811	-0.0816916	1.05826
A08	Cy5	Slfn5			IM	25.895	23.0099	2.88509			M WT	32	7.10229	1.98249	0.253053
A09	Cy5	Slfn5	M WT	99	IM	28.8061	23.6272	5.17887	5.1681		M WT	42	4.03418	-1.08562	2.12229
A10	Cy5	Slfn5			IM	28.7801	23.6228	5.15733			M WT	49	3.71504	-1.40476	2.64773
A11	Cy5	Slfn5	F KO	3	IM	27.7264	23.0935	4.63292	4.50284		M WT	53	5.31652	0.196723	0.87253
A12	Cy5	Slfn5			IM	27.6678	23.2951	4.37276			M KO	98	2.99009	-2.12971	4.37631	2.87503	0.918212	0.00324309
E01	Cy5	Slfn5	F KO	4	IM	28.718	23.373	5.34498	5.28999		M KO	18	3.66676	-1.45304	2.73784
E02	Cy5	Slfn5			IM	28.4487	23.2137	5.235			M KO	23	3.64749	-1.47231	2.77467
E03	Cy5	Slfn5	M WT	7	IM	27.9341	22.8785	5.05559	5.10833		M KO	24	3.7276	-1.3922	2.62479
E04	Cy5	Slfn5			IM	28.0573	22.8962	5.16108			M KO	46	4.22328	-0.896517	1.86157
E07	Cy5	Slfn5	M WT	9	IM	28.9087	22.831	6.07765	6.01434
E08	Cy5	Slfn5			IM	28.9142	22.9632	5.95103				Female	Ave. dCt	5.32525
E09	Cy5	Slfn5	F WT	11	IM	28.2342	22.1457	6.08858	6.17046			Slfn5	dCt	ddCt	Fold Change	Ave. Fold	Std dev	Ttest
E10	Cy5	Slfn5			IM	28.3537	22.1014	6.25234			F WT	95	4.34288	-0.982375	1.97572	1.33884	1.04447
E11	Cy5	Slfn5	F KO	14	IM	26.3985	22.9481	3.4504	3.34018		F WT	97	4.11177	-1.21348	2.31896
E12	Cy5	Slfn5			IM	26.3265	23.0966	3.22996			F WT	11	6.17046	0.845209	0.55663
A01	Cy5	Slfn5	F WT	16	IM	29.2666	23.5219	5.74478	5.89321		F WT	16	5.89321	0.567959	0.674571
A02	Cy5	Slfn5			IM	29.3432	23.3015	6.04164			F WT	21	5.07905	-0.246202	1.18608
A03	Cy5	Slfn5	M WT	17	IM	26.3247	21.7541	4.57069	4.58128		F WT	26	7.03785	1.7126	0.30511
A04	Cy5	Slfn5			IM	26.4248	21.8329	4.59187			F WT	27	6.31517	0.98992	0.503506
A07	Cy5	Slfn5	M KO	18	IM	26.8695	23.2194	3.65017	3.66676		F WT	45	3.65162	-1.67363	3.19016
A08	Cy5	Slfn5			IM	26.867	23.1837	3.68335			F KO	96	2.994	-2.33125	5.03242	3.72637	2.7012	0.0372737
A05	Cy5	Slfn5	M WT	20	IM	27.7927	22.7874	5.00524	5.03811		F KO	3	4.50284	-0.822412	1.76836
A06	Cy5	Slfn5			IM	27.8829	22.8119	5.07098			F KO	4	5.28999	-0.0352652	1.02475
A09	Cy5	Slfn5	F WT	21	IM	28.1243	23.1136	5.01074	5.07905		F KO	14	3.34018	-1.98507	3.95882
A10	Cy5	Slfn5			IM	28.1027	22.9554	5.14736			F KO	28	5.80274	0.477488	0.718227
A11	Cy5	Slfn5	M KO	23	IM	26.707	22.8915	3.81551	3.64749		F KO	43	2.85137	-2.47388	5.55538
A12	Cy5	Slfn5			IM	26.572	23.0926	3.47946			F KO	59	2.32045	-3.0048	8.02665
E01	Cy5	Slfn5	M KO	24	IM	26.2317	22.5058	3.72589	3.7276
E02	Cy5	Slfn5			IM	26.0368	22.3075	3.7293
E03	Cy5	Slfn5	F WT	26	IM	30.5207	23.3619	7.15876	7.03785
E04	Cy5	Slfn5			IM	30.5988	23.6818	6.91694
E05	Cy5	Slfn5	F WT	27	IM	29.1346	22.7512	6.38339	6.31517
E06	Cy5	Slfn5			IM	29.0323	22.7854	6.24695
E07	Cy5	Slfn5	F KO	28	IM	29.6439	23.7583	5.88563	5.80274
E08	Cy5	Slfn5			IM	29.7302	24.0104	5.71985
E09	Cy5	Slfn5	M WT	32	IM	30.4107	23.377	7.03366	7.10229
E10	Cy5	Slfn5			IM	30.3578	23.1869	7.17091
A01	Cy5	Slfn5	M WT	42	IM	27.8478	23.9182	3.92959	4.03418
A02	Cy5	Slfn5			IM	27.8807	23.7419	4.13877
A03	Cy5	Slfn5	F KO	43	IM	26.6291	23.8902	2.73896	2.85137
A04	Cy5	Slfn5			IM	26.7781	23.8144	2.96378
A05	Cy5	Slfn5	F WT	45	IM	27.3516	23.5243	3.82735	3.65162
A06	Cy5	Slfn5			IM	27.2307	23.7548	3.47589
E01	Cy5	Slfn5	M KO	46	IM	28.3261	24.1351	4.19105	4.22328
E02	Cy5	Slfn5			IM	28.0853	23.8298	4.25551
E03	Cy5	Slfn5	M WT	49	IM	27.2648	23.6233	3.64156	3.71504
E04	Cy5	Slfn5			IM	27.3376	23.5491	3.78852
A11	Cy5	Slfn5	M WT	53	IM	28.0465	22.6564	5.39006	5.31652
A12	Cy5	Slfn5			IM	28.0044	22.7614	5.24298
E05	Cy5	Slfn5	F KO	59	IM	26.2964	23.8709	2.42555	2.32045
E06	Cy5	Slfn5			IM	26.2666	24.0513	2.21536
A01	FAM	Slfn8	F WT	95	IM	23.9851	22.889	1.0961	1.31733			Male	Ave. dCt	1.77836
A02	FAM	Slfn8			IM	24.092	22.5535	1.53857				Slfn8	dCt	ddCt	Fold Change	Ave. Fold	Std dev	Ttest
A03	FAM	Slfn8	F KO	96	IM	25.9746	23.5923	2.38227	2.39574		M WT	99	2.53547	0.757114	0.591679	1.05567	0.34726
A04	FAM	Slfn8			IM	25.9515	23.5423	2.40922			M WT	7	1.48773	-0.290626	1.22317
A05	FAM	Slfn8	F WT	97	IM	24.3447	23.0159	1.32887	1.31594		M WT	9	2.35716	0.578805	0.669518
A06	FAM	Slfn8			IM	24.252	22.949	1.303			M WT	17	1.32275	-0.455601	1.37135
A07	FAM	Slfn8	M KO	98	IM	25.1386	22.7445	2.39405	2.27941		M WT	20	1.4056	-0.372756	1.29482
A08	FAM	Slfn8			IM	25.1747	23.0099	2.16477			M WT	32	1.78971	0.0113504	0.992163
A09	FAM	Slfn8	M WT	99	IM	26.1814	23.6272	2.55418	2.53547		M WT	42	1.56479	-0.213562	1.15955
A10	FAM	Slfn8			IM	26.1396	23.6228	2.51676			M WT	49	1.15095	-0.627403	1.54478
A11	FAM	Slfn8	F KO	3	IM	25.2446	23.0935	2.15113	2.02576		M WT	53	2.39103	0.612678	0.653982
A12	FAM	Slfn8			IM	25.1955	23.2951	1.90039			M KO	98	2.27941	0.501052	0.706591	1.00122	0.342631	0.782494
E01	FAM	Slfn8	F KO	4	IM	26.0509	23.373	2.67795	2.67799		M KO	18	2.24528	0.466922	0.723507
E02	FAM	Slfn8			IM	25.8917	23.2137	2.67803			M KO	23	1.39923	-0.379128	1.30056
E03	FAM	Slfn8	M WT	7	IM	24.3734	22.8785	1.49487	1.48773		M KO	24	2.03204	0.253684	0.838752
E04	FAM	Slfn8			IM	24.3768	22.8962	1.48059			M KO	46	1.25558	-0.522772	1.43671
E07	FAM	Slfn8	M WT	9	IM	25.2747	22.831	2.44364	2.35716
E08	FAM	Slfn8			IM	25.2339	22.9632	2.27068				Female	Ave. dCt	1.28492
E09	FAM	Slfn8	F WT	11	IM	23.4837	22.1457	1.33806	1.36531			Slfn8	dCt	ddCt	Fold Change	Ave. Fold	Std dev	Ttest
E10	FAM	Slfn8			IM	23.4939	22.1014	1.39255			F WT	95	1.31733	0.0324123	0.977784	1.02016	0.215448
E11	FAM	Slfn8	F KO	14	IM	25.0165	22.9481	2.0684	2.00381		F WT	97	1.31594	0.0310165	0.97873
E12	FAM	Slfn8			IM	25.0358	23.0966	1.93921			F WT	11	1.36531	0.080383	0.945807
A01	FAM	Slfn8	F WT	16	IM	24.4941	23.5219	0.972236	1.11038		F WT	16	1.11038	-0.174539	1.1286
A02	FAM	Slfn8			IM	24.5501	23.3015	1.24853			F WT	21	0.964644	-0.320278	1.24857
A03	FAM	Slfn8	M WT	17	IM	23.1211	21.7541	1.36703	1.32275		F WT	26	1.55479	0.26987	0.829394
A04	FAM	Slfn8			IM	23.1114	21.8329	1.27848			F WT	27	1.80374	0.518822	0.697942
A07	FAM	Slfn8	M KO	18	IM	25.4163	23.2194	2.19689	2.24528		F WT	45	0.847236	-0.437686	1.35443
A08	FAM	Slfn8			IM	25.4773	23.1837	2.29366			F KO	96	2.39574	1.11082	0.46303	0.809507	0.524735	0.315641
A05	FAM	Slfn8	M WT	20	IM	24.2684	22.7874	1.48097	1.4056		F KO	3	2.02576	0.740837	0.598392
A06	FAM	Slfn8			IM	24.1421	22.8119	1.33023			F KO	4	2.67799	1.39306	0.380755
A09	FAM	Slfn8	F WT	21	IM	23.9916	23.1136	0.878045	0.964644		F KO	14	2.00381	0.718883	0.607568
A10	FAM	Slfn8			IM	24.0066	22.9554	1.05124			F KO	28	2.14683	0.861911	0.550223
A11	FAM	Slfn8	M KO	23	IM	24.415	22.8915	1.52354	1.39923		F KO	43	0.432735	-0.852187	1.80524
A12	FAM	Slfn8			IM	24.3675	23.0926	1.27492			F KO	59	0.949962	-0.33496	1.26134
E01	FAM	Slfn8	M KO	24	IM	24.5117	22.5058	2.00589	2.03204
E02	FAM	Slfn8			IM	24.3657	22.3075	2.05819
E03	FAM	Slfn8	F WT	26	IM	25.0743	23.3619	1.71243	1.55479
E04	FAM	Slfn8			IM	25.079	23.6818	1.39715
E05	FAM	Slfn8	F WT	27	IM	24.5959	22.7512	1.84472	1.80374
E06	FAM	Slfn8			IM	24.5482	22.7854	1.76277
E07	FAM	Slfn8	F KO	28	IM	26.0072	23.7583	2.24894	2.14683
E08	FAM	Slfn8			IM	26.0551	24.0104	2.04473
E09	FAM	Slfn8	M WT	32	IM	25.0854	23.377	1.70835	1.78971
E10	FAM	Slfn8			IM	25.058	23.1869	1.87107
A01	FAM	Slfn8	M WT	42	IM	25.4024	23.9182	1.48418	1.56479
A02	FAM	Slfn8			IM	25.3873	23.7419	1.64541
A03	FAM	Slfn8	F KO	43	IM	24.2847	23.8902	0.39457	0.432735
A04	FAM	Slfn8			IM	24.2853	23.8144	0.4709
A05	FAM	Slfn8	F WT	45	IM	24.4683	23.5243	0.944062	0.847236
A06	FAM	Slfn8			IM	24.5052	23.7548	0.750409
E01	FAM	Slfn8	M KO	46	IM	25.3448	24.1351	1.20971	1.25558
E02	FAM	Slfn8			IM	25.1312	23.8298	1.30146
E03	FAM	Slfn8	M WT	49	IM	24.6885	23.6233	1.06525	1.15095
E04	FAM	Slfn8			IM	24.7858	23.5491	1.23666
A11	FAM	Slfn8	M WT	53	IM	25.1284	22.6564	2.47195	2.39103
A12	FAM	Slfn8			IM	25.0715	22.7614	2.31012
E05	FAM	Slfn8	F KO	59	IM	24.8694	23.8709	0.998529	0.949962
E06	FAM	Slfn8			IM	24.9527	24.0513	0.901395
B01	Cy5	Slfn9	F WT	95	IM	24.481	22.889	1.59197	1.75557			Male	Ave. dCt	2.41392
B02	Cy5	Slfn9			IM	24.4726	22.5535	1.91916				Slfn9	dCt	ddCt	Fold Change	Ave. Fold	Std dev	Ttest
B03	Cy5	Slfn9	F KO	96	IM	26.1717	23.5923	2.57936	2.59369		M WT	99	3.32137	0.907442	0.53313	1.05838	0.368647
B04	Cy5	Slfn9			IM	26.1503	23.5423	2.60802			M WT	7	2.14113	-0.27279	1.20814
B05	Cy5	Slfn9	F WT	97	IM	24.9094	23.0159	1.89351	1.98264		M WT	9	2.75276	0.33884	0.790677
B06	Cy5	Slfn9			IM	25.0208	22.949	2.07177			M WT	17	1.68878	-0.725148	1.65307
B07	Cy5	Slfn9	M KO	98	IM	25.3667	22.7445	2.62223	2.51252		M WT	20	1.83017	-0.583752	1.49874
B08	Cy5	Slfn9			IM	25.4127	23.0099	2.40282			M WT	32	2.33957	-0.0743501	1.05289
B09	Cy5	Slfn9	M WT	99	IM	26.9405	23.6272	3.31326	3.32137		M WT	42	2.69489	0.280962	0.823042
B10	Cy5	Slfn9			IM	26.9523	23.6228	3.32947			M WT	49	2.13939	-0.274537	1.20961
B11	Cy5	Slfn9	F KO	3	IM	25.4553	23.0935	2.36179	2.34942		M WT	53	2.81726	0.403332	0.75611
B12	Cy5	Slfn9			IM	25.6321	23.2951	2.33706			M KO	98	2.51252	0.0986004	0.933939	0.996716	0.172467	0.733362
F01	Cy5	Slfn9	F KO	4	IM	26.4243	23.373	3.05136	3.06269		M KO	18	2.60595	0.192028	0.875374
F02	Cy5	Slfn9			IM	26.2877	23.2137	3.07402			M KO	23	2.09554	-0.318385	1.24693
F03	Cy5	Slfn9	M WT	7	IM	24.9905	22.8785	2.11202	2.14113		M KO	24	2.68205	0.268126	0.830397
F04	Cy5	Slfn9			IM	25.0664	22.8962	2.17025			M KO	46	2.28044	-0.133482	1.09694
F07	Cy5	Slfn9	M WT	9	IM	25.6432	22.831	2.81214	2.75276
F08	Cy5	Slfn9			IM	25.6566	22.9632	2.69339				Female	Ave. dCt	1.8313
F09	Cy5	Slfn9	F WT	11	IM	24.1401	22.1457	1.99444	1.96584			Slfn9	dCt	ddCt	Fold Change	Ave. Fold	Std dev	Ttest
F10	Cy5	Slfn9			IM	24.0386	22.1014	1.93725			F WT	95	1.75557	-0.0757357	1.0539	1.03976	0.31007
F11	Cy5	Slfn9	F KO	14	IM	25.458	22.9481	2.50988	2.48745		F WT	97	1.98264	0.151334	0.900418
F12	Cy5	Slfn9			IM	25.5616	23.0966	2.46502			F WT	11	1.96584	0.13454	0.91096
B01	Cy5	Slfn9	F WT	16	IM	24.8936	23.5219	1.37175	1.47646		F WT	16	1.47646	-0.354841	1.27884
B02	Cy5	Slfn9			IM	24.8827	23.3015	1.58117			F WT	21	1.16045	-0.670853	1.59201
B03	Cy5	Slfn9	M WT	17	IM	23.4533	21.7541	1.69924	1.68878		F WT	26	2.21209	0.380791	0.768016
B04	Cy5	Slfn9			IM	23.5112	21.8329	1.67831			F WT	27	2.52267	0.691367	0.619267
B07	Cy5	Slfn9	M KO	18	IM	25.7972	23.2194	2.57781	2.60595		F WT	45	1.5747	-0.256602	1.19466
B08	Cy5	Slfn9			IM	25.8177	23.1837	2.6341			F KO	96	2.59369	0.762389	0.589519	0.667926	0.220523	0.0205025
B05	Cy5	Slfn9	M WT	20	IM	24.6094	22.7874	1.822	1.83017		F KO	3	2.34942	0.51812	0.698281
B06	Cy5	Slfn9			IM	24.6502	22.8119	1.83835			F KO	4	3.06269	1.23138	0.425908
B09	Cy5	Slfn9	F WT	21	IM	24.2109	23.1136	1.0973	1.16045		F KO	14	2.48745	0.656149	0.63457
B10	Cy5	Slfn9			IM	24.179	22.9554	1.2236			F KO	28	3.02174	1.19044	0.43817
B11	Cy5	Slfn9	M KO	23	IM	25.049	22.8915	2.15757	2.09554		F KO	43	1.77113	-0.0601733	1.04259
B12	Cy5	Slfn9			IM	25.1261	23.0926	2.03351			F KO	59	2.07182	0.240519	0.846441
F01	Cy5	Slfn9	M KO	24	IM	25.1203	22.5058	2.61453	2.68205
F02	Cy5	Slfn9			IM	25.0571	22.3075	2.74957
F03	Cy5	Slfn9	F WT	26	IM	25.6828	23.3619	2.32094	2.21209
F04	Cy5	Slfn9			IM	25.7851	23.6818	2.10325
F05	Cy5	Slfn9	F WT	27	IM	25.2421	22.7512	2.49089	2.52267
F06	Cy5	Slfn9			IM	25.3398	22.7854	2.55445
F07	Cy5	Slfn9	F KO	28	IM	26.8572	23.7583	3.09887	3.02174
F08	Cy5	Slfn9			IM	26.955	24.0104	2.94461
F09	Cy5	Slfn9	M WT	32	IM	25.7024	23.377	2.3254	2.33957
F10	Cy5	Slfn9			IM	25.5407	23.1869	2.35375
B01	Cy5	Slfn9	M WT	42	IM	26.5418	23.9182	2.62355	2.69489
B02	Cy5	Slfn9			IM	26.5082	23.7419	2.76623
B03	Cy5	Slfn9	F KO	43	IM	25.6613	23.8902	1.77117	1.77113
B04	Cy5	Slfn9			IM	25.5855	23.8144	1.7711
B05	Cy5	Slfn9	F WT	45	IM	25.2304	23.5243	1.7061	1.5747
B06	Cy5	Slfn9			IM	25.1981	23.7548	1.4433
F01	Cy5	Slfn9	M KO	46	IM	26.2625	24.1351	2.12747	2.28044
F02	Cy5	Slfn9			IM	26.2632	23.8298	2.43341
F03	Cy5	Slfn9	M WT	49	IM	25.7613	23.6233	2.138	2.13939
F04	Cy5	Slfn9			IM	25.6899	23.5491	2.14077
B11	Cy5	Slfn9	M WT	53	IM	25.5063	22.6564	2.84984	2.81726
B12	Cy5	Slfn9			IM	25.5461	22.7614	2.78467
F05	Cy5	Slfn9	F KO	59	IM	26.0558	23.8709	2.18493	2.07182
F06	Cy5	Slfn9			IM	26.01	24.0513	1.95872
B01	HEX	RPLP0			IM	22.889
B02	HEX	RPLP0			IM	22.5535
B03	HEX	RPLP0			IM	23.5923
B04	HEX	RPLP0			IM	23.5423
B05	HEX	RPLP0			IM	23.0159
B06	HEX	RPLP0			IM	22.949
B07	HEX	RPLP0			IM	22.7445
B08	HEX	RPLP0			IM	23.0099
B09	HEX	RPLP0			IM	23.6272
B10	HEX	RPLP0			IM	23.6228
B11	HEX	RPLP0			IM	23.0935
B12	HEX	RPLP0			IM	23.2951
C01	HEX	RPLP0			IM	22.8456
C02	HEX	RPLP0			IM	22.3035
C03	HEX	RPLP0			IM	23.4704
C04	HEX	RPLP0			IM	23.5908
C05	HEX	RPLP0			IM	23.1289
C06	HEX	RPLP0			IM	22.8727
C07	HEX	RPLP0			IM	22.6564
C08	HEX	RPLP0			IM	22.6735
C09	HEX	RPLP0			IM	23.702
C10	HEX	RPLP0			IM	23.7558
C11	HEX	RPLP0			IM	23.1778
C12	HEX	RPLP0			IM	23.1133
D01	HEX	RPLP0			IM	22.6105
D02	HEX	RPLP0			IM	22.5856
D03	HEX	RPLP0			IM	23.5307
D04	HEX	RPLP0			IM	23.5883
D05	HEX	RPLP0			IM	23.1805
D06	HEX	RPLP0			IM	23.12
D07	HEX	RPLP0			IM	22.6925
D08	HEX	RPLP0			IM	22.7532
D09	HEX	RPLP0			IM	23.6146
D10	HEX	RPLP0			IM	23.8917
D11	HEX	RPLP0			IM	23.2184
D12	HEX	RPLP0			IM	23.0993
F01	HEX	RPLP0			IM	23.373
F02	HEX	RPLP0			IM	23.2137
F03	HEX	RPLP0			IM	22.8785
F04	HEX	RPLP0			IM	22.8962
F07	HEX	RPLP0			IM	22.831
F08	HEX	RPLP0			IM	22.9632
F09	HEX	RPLP0			IM	22.1457
F10	HEX	RPLP0			IM	22.1014
F11	HEX	RPLP0			IM	22.9481
F12	HEX	RPLP0			IM	23.0966
G01	HEX	RPLP0			IM	23.4441
G02	HEX	RPLP0			IM	23.3865
G03	HEX	RPLP0			IM	23.0468
G04	HEX	RPLP0			IM	23.091
G07	HEX	RPLP0			IM	23.1885
G08	HEX	RPLP0			IM	23.259
G09	HEX	RPLP0			IM	22.2133
G10	HEX	RPLP0			IM	22.2619
G11	HEX	RPLP0			IM	23.3074
G12	HEX	RPLP0			IM	23.4493
H01	HEX	RPLP0			IM	23.4376
H02	HEX	RPLP0			IM	23.3799
H03	HEX	RPLP0			IM	23.0665
H04	HEX	RPLP0			IM	23.2709
H07	HEX	RPLP0			IM	23.3344
H08	HEX	RPLP0			IM	23.4852
H09	HEX	RPLP0			IM	22.466
H10	HEX	RPLP0			IM	22.4118
H11	HEX	RPLP0			IM	23.0742
H12	HEX	RPLP0			IM	23.3741
