# Supplementary material for: Loss of Schlafen3 influences the expression levels of Schlafen family members in ileum, thymus, and spleen tissue
Source: PeerJ. 2020 Jan 28;8:e8461. doi: 10.7717/peerj.8461 (PMC6993753; doi:10.7717/peerj.8461)
Supplement: Supplemental Information 18 [file peerj-08-8461-s018.xlsx]

## Sheet: 20190103_SLFN3KO SLFN FAM PANET
File Name	20190103_SLFN3KO SLFN FAM PANETH TEST.pcrd
Created By User
Notes
ID
Run Started	01/04/2019 01:09:20 UTC
Run Ended	01/04/2019 02:22:26 UTC
Sample Vol	20
Lid Temp	105
Protocol File Name	Unknown.prcl
Plate Setup File Name	DefaultPlate.pltd
Base Serial Number	CT031118
Optical Head Serial Number	785BR9482
CFX Manager Version	3.1.1517.0823.
Well group	All Wells
Amplification step	3
Melt step
Well	Fluor	Target	Content	Sample	Cq	Starting Quantity (SQ)
C01	Cy5	Slfn5	Unkn	I27	28.245
C02	Cy5	Slfn5	Unkn	I27	28.065
C03	Cy5	Slfn5	Unkn	I40	28.3425
C04	Cy5	Slfn5	Unkn	I40	28.231
C05	Cy5	Pla2g4c	Unkn	I27	30.337
C06	Cy5	Pla2g4c	Unkn	I27	30.2408
C07	Cy5	Pla2g4c	Unkn	I40	24.0325
C08	Cy5	Pla2g4c	Unkn	I40	23.9867
D05	Cy5	Slfn9	Unkn	I27	27.5292
D06	Cy5	Slfn9	Unkn	I27	27.5382
D07	Cy5	Slfn9	Unkn	I40	27.0635
D08	Cy5	Slfn9	Unkn	I40	27.2951
E01	Cy5	Slfn9	Unkn	I27	28.0934
E02	Cy5	Slfn9	Unkn	I27	27.8653
E03	Cy5	Slfn9	Unkn	I40	27.2086
E04	Cy5	Slfn9	Unkn	I40	27.3216
E05	Cy5	Pla2g4c	Unkn	I27	30.292	24.1043
E06	Cy5	Pla2g4c	Unkn	I27	30.8639	24.0788
E07	Cy5	Pla2g4c	Unkn	I40	23.8606	24.0082
E08	Cy5	Pla2g4c	Unkn	I40	24.0663	24.0653
F01	Cy5	Slfn5	Unkn	I27	27.5392	24.5422
F02	Cy5	Slfn5	Unkn	I27	28.0765	24.595
F03	Cy5	Slfn5	Unkn	I40	28.2264	24.3977
F04	Cy5	Slfn5	Unkn	I40	28.2152	24.3695
G01	Cy5	Slfn5	Unkn	I27	28.2116
G02	Cy5	Slfn5	Unkn	I27	28.2563
G03	Cy5	Slfn5	Unkn	I40	28.2995
G04	Cy5	Slfn5	Unkn	I40	28.2715
H01	Cy5	Slfn9	Unkn	I27	27.9549	24.5422
H02	Cy5	Slfn9	Unkn	I27	28.024	24.595
H03	Cy5	Slfn9	Unkn	I40	27.6046	24.3977
H04	Cy5	Slfn9	Unkn	I40	27.1678	24.3695
A01	FAM	Slfn1	Unkn	I27	31.5833
A02	FAM	Slfn1	Unkn	I27	31.5868
A03	FAM	Slfn1	Unkn	I40	30.7694
A04	FAM	Slfn1	Unkn	I40	30.9715
B05	FAM	Ang4	Unkn	I27	23.7366
B06	FAM	Ang4	Unkn	I27	23.8405
B07	FAM	Ang4	Unkn	I40	22.0165
B08	FAM	Ang4	Unkn	I40	22.1832
D01	FAM	Slfn8	Unkn	I27	27.3898
D02	FAM	Slfn8	Unkn	I27	27.3356
D03	FAM	Slfn8	Unkn	I40	26.9916
D04	FAM	Slfn8	Unkn	I40	27.2267
D05	FAM	Slfn8	Unkn	I27	27.1896
D06	FAM	Slfn8	Unkn	I27	27.1901
D07	FAM	Slfn8	Unkn	I40	27.031
D08	FAM	Slfn8	Unkn	I40	27.2706
E05	FAM	Ang4	Unkn	I27	23.6995	24.1043
E06	FAM	Ang4	Unkn	I27	23.6808	24.0788
E07	FAM	Ang4	Unkn	I40	22.0786	24.0082
E08	FAM	Ang4	Unkn	I40	22.2981	24.0653
F01	FAM	Slfn8	Unkn	I27	27.3149	24.5422
F02	FAM	Slfn8	Unkn	I27	27.221	24.595
F03	FAM	Slfn8	Unkn	I40	26.9542	24.3977
F04	FAM	Slfn8	Unkn	I40	27.0598	24.3695
G01	FAM	Slfn1	Unkn	I27	31.2426
G02	FAM	Slfn1	Unkn	I27	31.2345
G03	FAM	Slfn1	Unkn	I40	30.3392
G04	FAM	Slfn1	Unkn	I40	30.2185
H01	FAM	Slfn1	Unkn	I27	31.5593	24.5422
H02	FAM	Slfn1	Unkn	I27	31.696	24.595
H03	FAM	Slfn1	Unkn	I40	30.9664	24.3977
H04	FAM	Slfn1	Unkn	I40	30.8781	24.3695
A05	HEX	RPLP0	Unkn	I27	24.3633
A06	HEX	RPLP0	Unkn	I27	24.2557
A07	HEX	RPLP0	Unkn	I40	24.3048
A08	HEX	RPLP0	Unkn	I40	24.3461
B01	HEX	Slfn2	Unkn	I27	23.898
B02	HEX	Slfn2	Unkn	I27	23.7047
B03	HEX	Slfn2	Unkn	I40	24.1521
B04	HEX	Slfn2	Unkn	I40	24.2331
D05	HEX	RPLP0	Unkn	I27	24.147
D06	HEX	RPLP0	Unkn	I27	24.2439
D07	HEX	RPLP0	Unkn	I40	24.1954
D08	HEX	RPLP0	Unkn	I40	24.4014
E05	HEX	RPLP0	Unkn	I27	24.1043
E06	HEX	RPLP0	Unkn	I27	24.0788
E07	HEX	RPLP0	Unkn	I40	24.0082
E08	HEX	RPLP0	Unkn	I40	24.0653
F01	HEX	Slfn2	Unkn	I27	23.8763	24.5422
F02	HEX	Slfn2	Unkn	I27	23.6765	24.595
F03	HEX	Slfn2	Unkn	I40	24.1428	24.3977
F04	HEX	Slfn2	Unkn	I40	24.2524	24.3695
G01	HEX	Slfn2	Unkn	I27	24.0116
G02	HEX	Slfn2	Unkn	I27	23.7132
G03	HEX	Slfn2	Unkn	I40	24.1276
G04	HEX	Slfn2	Unkn	I40	24.1943
H01	HEX	RPLP0	Unkn	I27	24.5422
H02	HEX	RPLP0	Unkn	I27	24.595
H03	HEX	RPLP0	Unkn	I40	24.3977
H04	HEX	RPLP0	Unkn	I40	24.3695
