# Supplementary material for: Loss of Schlafen3 influences the expression levels of Schlafen family members in ileum, thymus, and spleen tissue
Source: PeerJ. 2020 Jan 28;8:e8461. doi: 10.7717/peerj.8461 (PMC6993753; doi:10.7717/peerj.8461)
Supplement: Supplemental Information 19 [file peerj-08-8461-s019.xlsx]

## Sheet: 20190104_SLFN3KO FAMILY PANETH
File Name	20190104_SLFN3KO FAMILY PANETH.pcrd
Created By User
Notes
ID
Run Started	01/04/2019 20:53:26 UTC
Run Ended	01/04/2019 22:06:21 UTC
Sample Vol	20
Lid Temp	105
Protocol File Name	Unknown.prcl
Plate Setup File Name	DefaultPlate.pltd
Base Serial Number	CT031118
Optical Head Serial Number	785BR9482
CFX Manager Version	3.1.1517.0823.
Well group	All Wells
Amplification step	3
Melt step
Well	Fluor	Target	ID	Sample	Cq	Starting Quantity (SQ)	dCt	Ave. dCt			Male	Ave. dCt	-2.71741
C01	FAM	Ang4	M WT	I1	21.0112	23.6954	-2.68421	-2.68466			Ang4	dCt	ddCt	Fold Change	Ave. Fold	Std dev	Ttest
C02	FAM	Ang4			20.8113	23.4964	-2.6851			M-WT	I1	-2.68466	0.032755	0.977552	1.18595	0.892803
C03	FAM	Ang4	M KO	I2	20.7693	22.9604	-2.19111	-2.10863		M-WT	I3	-2.38331	0.334097	0.79328
C04	FAM	Ang4			21.0047	23.0308	-2.02615			M-WT	I4	-2.66968	0.0477273	0.967459
C05	FAM	Ang4	M WT	I3	21.8984	24.2828	-2.38443	-2.38331		M-WT	I6	-2.10552	0.611891	0.654339
C06	FAM	Ang4			21.7138	24.096	-2.3822			M-WT	I9	-2.96511	-0.247697	1.18731
C07	FAM	Ang4	M WT	I4	21.2222	23.8155	-2.59324	-2.66968		M-WT	I10	-3.17373	-0.456318	1.37204
C08	FAM	Ang4			21.2394	23.9856	-2.74613			M-WT	I18	-4.64569	-1.92828	3.80602
C09	FAM	Ang4	M KO	I5	21.6806	24.1117	-2.43101	-2.46761		M-WT	I20	-3.79827	-1.08086	2.11529
C10	FAM	Ang4			21.6662	24.1704	-2.50421			M-WT	I22	-2.67803	0.0393853	0.973069
C11	FAM	Ang4	M WT	I6	20.6579	22.7508	-2.09292	-2.10552		M-WT	I24	-2.27704	0.440366	0.736947
C12	FAM	Ang4			20.942	23.0601	-2.11812			M-WT	I35	-2.24867	0.468736	0.722597
F01	FAM	Ang4	M KO	I7	21.4908	25.3722	-3.88138	-3.88862		M-WT	I36	-1.59801	1.1194	0.460286
F02	FAM	Ang4			21.334	25.2299	-3.89585			M-WT	I39	-2.09861	0.618797	0.651214
F03	FAM	Ang4	M KO	I8	21.0438	23.5787	-2.53494	-2.60957		M-KO	I2	-2.10863	0.608779	0.655752	1.18186	0.501691	0.990213
F04	FAM	Ang4			21.044	23.7282	-2.6842			M-KO	I5	-2.46761	0.249802	0.841012
F05	FAM	Ang4	M WT	I9	21.2035	24.1476	-2.94414	-2.96511		M-KO	I7	-3.88862	-1.17121	2.252
F06	FAM	Ang4			21.1555	24.1416	-2.98608			M-KO	I8	-2.60957	0.107841	0.927976
F07	FAM	Ang4	M WT	I10	21.3376	24.4227	-3.08515	-3.17373		M-KO	I12	-2.83756	-0.120145	1.08684
F08	FAM	Ang4			21.248	24.5103	-3.26231			M-KO	I19	-3.52421	-0.806799	1.74933
F09	FAM	Ang4	M KO	I12	20.873	23.7316	-2.8586	-2.83756		M-KO	I21	-2.60405	0.113363	0.924431
F10	FAM	Ang4			20.778	23.5945	-2.81652			M-KO	I23	-2.86407	-0.146661	1.107
F11	FAM	Ang4	M WT	I18	20.6085	25.3128	-4.70425	-4.64569		M-KO	I25	-2.84486	-0.127449	1.09236
F12	FAM	Ang4			20.7531	25.3403	-4.58714
G09	FAM	Ang4	M KO	I19	20.8825	24.3637	-3.48124	-3.52421			Female	Ave. dCt	-2.49962
G10	FAM	Ang4			20.653	24.2202	-3.56718				Ang4	dCt	ddCt	Fold Change	Ave. Fold	Std dev	Ttest
G11	FAM	Ang4	M WT	I20	20.8255	24.5873	-3.76176	-3.79827		F WT	I27	-0.401392	2.09823	0.233545	1.18277	0.715343
G12	FAM	Ang4			21.1128	24.9476	-3.83478			F WT	I40	-1.84844	0.651186	0.636756
E05	FAM	Ang4	F WT	I27	23.6995	24.1043	-0.404793	-0.401392		F WT	I11	-2.23326	0.266361	0.831414
E06	FAM	Ang4			23.6808	24.0788	-0.39799			F WT	I13	-4.06004	-1.56042	2.9494
E07	FAM	Ang4	F WT	I40	22.0786	24.0082	-1.92965	-1.84844		F WT	I14	-3.47648	-0.976862	1.96818
E08	FAM	Ang4			22.2981	24.0653	-1.76722			F WT	I26	-2.03011	0.469514	0.722208
C01	FAM	Ang4	M KO	I21	21.2765	23.9793	-2.70283	-2.60405		F WT	I17	-2.67733	-0.177706	1.13108
C02	FAM	Ang4			21.0145	23.5198	-2.50527			F WT	I30	-2.11224	0.38738	0.764517
C03	FAM	Ang4	M WT	I22	21.3142	23.9877	-2.67342	-2.67803		F WT	I31	-2.93367	-0.434044	1.35102
C04	FAM	Ang4			21.2577	23.9403	-2.68263			F WT	I32	-2.65999	-0.160366	1.11757
C05	FAM	Ang4	M KO	I23	21.835	24.726	-2.89108	-2.86407		F WT	I37	-3.09138	-0.591759	1.50708
C06	FAM	Ang4			21.8033	24.6404	-2.83707			F WT	I44	-2.47113	0.0284887	0.980447
C07	FAM	Ang4	M WT	I24	21.5897	23.9319	-2.34216	-2.27704		F KO	I15	-3.03496	-0.535341	1.44928
C08	FAM	Ang4			21.4572	23.6691	-2.21193			F KO	I16	-2.55889	-0.0592655	1.04194	1.24229	0.299975	0.808943
C09	FAM	Ang4	M KO	I25	21.2194	24.1692	-2.94983	-2.84486		F KO	I28	-2.88353	-0.383907	1.30487
C10	FAM	Ang4			21.0121	23.752	-2.73989			F KO	I29	-2.52289	-0.0232718	1.01626
C11	FAM	Ang4	M WT	I35	21.3186	23.6403	-2.32164	-2.24867		F KO	I33	-3.23061	-0.730986	1.65977
C12	FAM	Ang4			21.3087	23.4844	-2.17571			F KO	I34	-2.76188	-0.262256	1.19935
F01	FAM	Ang4	M WT	I36	22.417	23.9933	-1.57626	-1.59801		F KO	I38	-3.23707	-0.737452	1.66723
F02	FAM	Ang4			22.363	23.9828	-1.61976			F KO	I41	-2.74061	-0.240985	1.1818
F03	FAM	Ang4	M WT	I39	20.1608	22.3605	-2.19973	-2.09861		F KO	I42	-2.7838	-0.284174	1.21771
F04	FAM	Ang4			20.2957	22.2932	-1.9975			F KO	I43	-1.95318	0.54644	0.684708
F05	FAM	Ang4	F WT	I11	21.299	23.4475	-2.14849	-2.23326
F06	FAM	Ang4			21.2912	23.6093	-2.31804
F07	FAM	Ang4	F WT	I13	19.4265	23.4398	-4.01326	-4.06004
F08	FAM	Ang4			19.4285	23.5353	-4.10683
F09	FAM	Ang4	F WT	I14	19.7571	23.2007	-3.44364	-3.47648
F10	FAM	Ang4			19.6758	23.1852	-3.50933
F11	FAM	Ang4	F KO	I15	21.0435	24.0013	-2.95779	-3.03496
F12	FAM	Ang4			21.0627	24.1749	-3.11214
G09	FAM	Ang4	F KO	I16	19.6571	22.2313	-2.57419	-2.55889
G10	FAM	Ang4			19.6806	22.2241	-2.54358
G11	FAM	Ang4	F WT	I26	21.6951	23.611	-1.91596	-2.03011
G12	FAM	Ang4			21.7515	23.8957	-2.14425
C01	FAM	Ang4	F WT	I17	20.6997	23.3385	-2.6388	-2.67733
C02	FAM	Ang4			20.5212	23.237	-2.71586
C05	FAM	Ang4	F KO	I28	21.8922	24.7748	-2.88262	-2.88353
C06	FAM	Ang4			21.8202	24.7046	-2.88444
C07	FAM	Ang4	F KO	I29	22.2432	24.7441	-2.50091	-2.52289
C08	FAM	Ang4			22.2198	24.7647	-2.54487
C09	FAM	Ang4	F WT	I30	22.051	24.2412	-2.19018	-2.11224
C10	FAM	Ang4			21.7489	23.7832	-2.03431
C11	FAM	Ang4	F WT	I31	19.6682	22.5179	-2.84974	-2.93367
C12	FAM	Ang4			19.7461	22.7637	-3.01759
F01	FAM	Ang4	F WT	I32	20.9674	23.7036	-2.73626	-2.65999
F02	FAM	Ang4			21.001	23.5847	-2.58371
F03	FAM	Ang4	F KO	I33	19.5952	22.8913	-3.29606	-3.23061
F04	FAM	Ang4			19.5793	22.7445	-3.16515
F05	FAM	Ang4	F KO	I34	19.731	22.448	-2.71693	-2.76188
F06	FAM	Ang4			19.6787	22.4855	-2.80683
F07	FAM	Ang4	F KO	I38	21.588	24.7896	-3.20152	-3.23707
F08	FAM	Ang4			21.6085	24.8811	-3.27263
F11	FAM	Ang4	F KO	I41	19.7396	22.3836	-2.64395	-2.74061
F12	FAM	Ang4			19.6248	22.4621	-2.83727
G09	FAM	Ang4	F WT	I37	21.5018	24.605	-3.10317	-3.09138
G10	FAM	Ang4			21.5777	24.6573	-3.07959
G11	FAM	Ang4	F KO	I42	20.7836	23.5546	-2.77107	-2.7838
G12	FAM	Ang4			21.0358	23.8323	-2.79653
H09	FAM	Ang4	F KO	I43	21.3276	23.3369	-2.00926	-1.95318
H10	FAM	Ang4			21.4322	23.3293	-1.8971
H11	FAM	Ang4	F WT	I44	21.1177	23.5308	-2.41314	-2.47113
H12	FAM	Ang4			21.2538	23.7829	-2.52913
C01	Cy5	Pla2g4c	M WT	I1	24.1391	23.6954	0.443736	0.496082			Male	Ave. dCt	1.67229
C02	Cy5	Pla2g4c			24.0448	23.4964	0.548429				Pla2g4c	dCt	ddCt	Fold Change	Ave. Fold	Std dev	Ttest
C03	Cy5	Pla2g4c	M KO	I2	26.2857	22.9604	3.32528	3.41379		M-WT	I1	0.496082	-1.17621	2.25982	1.29067	0.789638
C04	Cy5	Pla2g4c			26.5331	23.0308	3.50229			M-WT	I3	1.47238	-0.199911	1.14863
C05	Cy5	Pla2g4c	M WT	I3	25.7521	24.2828	1.4693	1.47238		M-WT	I4	2.75966	1.08737	0.470618
C06	Cy5	Pla2g4c			25.5715	24.096	1.47545			M-WT	I6	3.80449	2.1322	0.22811
C07	Cy5	Pla2g4c	M WT	I4	26.7159	23.8155	2.90045	2.75966		M-WT	I9	2.44232	0.770037	0.586402
C08	Cy5	Pla2g4c			26.6044	23.9856	2.61887			M-WT	I10	0.988823	-0.683465	1.60599
C09	Cy5	Pla2g4c	M KO	I5	26.2615	24.1117	2.14983	2.12923		M-WT	I18	3.96236	2.29007	0.204466
C10	Cy5	Pla2g4c			26.279	24.1704	2.10862			M-WT	I20	1.21231	-0.459977	1.37552
C11	Cy5	Pla2g4c	M WT	I6	26.5759	22.7508	3.82517	3.80449		M-WT	I22	0.647978	-1.02431	2.03399
C12	Cy5	Pla2g4c			26.8439	23.0601	3.7838			M-WT	I24	0.952096	-0.720192	1.6474
F01	Cy5	Pla2g4c	M KO	I7	27.6088	25.3722	2.23654	2.25181		M-WT	I35	1.14805	-0.524239	1.43818
F02	Cy5	Pla2g4c			27.497	25.2299	2.26709			M-WT	I36	0.206871	-1.46542	2.76143
F03	Cy5	Pla2g4c	M KO	I8	27.1333	23.5787	3.55461	3.57988		M-WT	I39	1.64633	-0.0259574	1.01816
F04	Cy5	Pla2g4c			27.3333	23.7282	3.60516			M-KO	I2	3.41379	1.7415	0.299059	1.21722	1.2957	0.870101
F05	Cy5	Pla2g4c	M WT	I9	26.619	24.1476	2.4714	2.44232		M-KO	I5	2.12923	0.456939	0.72853
F06	Cy5	Pla2g4c			26.5549	24.1416	2.41325			M-KO	I7	2.25181	0.579526	0.669183
F07	Cy5	Pla2g4c	M WT	I10	25.4884	24.4227	1.06574	0.988823		M-KO	I8	3.57988	1.90759	0.266537
F08	Cy5	Pla2g4c			25.4222	24.5103	0.91191			M-KO	I12	3.73572	2.06343	0.239247
F09	Cy5	Pla2g4c	M KO	I12	27.511	23.7316	3.77946	3.73572		M-KO	I19	-0.195136	-1.86742	3.6488
F10	Cy5	Pla2g4c			27.2865	23.5945	3.69197			M-KO	I21	-0.0048568	-1.67714	3.19794
F11	Cy5	Pla2g4c	M WT	I18	29.2753	25.3128	3.96254	3.96236		M-KO	I23	2.34613	0.673841	0.626836
F12	Cy5	Pla2g4c			29.3024	25.3403	3.96217			M-KO	I25	1.31744	-0.354846	1.27885
G09	Cy5	Pla2g4c	M KO	I19	24.2229	24.3637	-0.140879	-0.195136
G10	Cy5	Pla2g4c			23.9708	24.2202	-0.249392				Female	Ave. dCt	1.3636
G11	Cy5	Pla2g4c	M WT	I20	25.7647	24.5873	1.17748	1.21231			Pla2g4c	dCt	ddCt	Fold Change	Ave. Fold	Std dev	Ttest
G12	Cy5	Pla2g4c			26.1948	24.9476	1.24714			F WT	I27	6.48641	5.12281	0.0286999	2.5953	4.08512
E05	Cy5	Pla2g4c	F WT	I27	30.292	24.1043	6.18769	6.48641		F WT	I40	-0.0733401	-1.43694	2.70746
E06	Cy5	Pla2g4c			30.8639	24.0788	6.78512			F WT	I11	0.215218	-1.14838	2.21665
E07	Cy5	Pla2g4c	F WT	I40	23.8606	24.0082	-0.147665	-0.0733401		F WT	I13	0.0412878	-1.32231	2.50066
E08	Cy5	Pla2g4c			24.0663	24.0653	0.000985156			F WT	I14	2.03401	0.670415	0.628326
C01	Cy5	Pla2g4c	M KO	I21	23.9019	23.9793	-0.0773563	-0.0048568		F WT	I26	-1.1026	-2.4662	5.52586
C02	Cy5	Pla2g4c			23.5874	23.5198	0.0676427			F WT	I17	1.75991	0.396313	0.759798
C03	Cy5	Pla2g4c	M WT	I22	24.5956	23.9877	0.607923	0.647978		F WT	I30	1.36209	-0.00151173	1.00105
C04	Cy5	Pla2g4c			24.6284	23.9403	0.688034			F WT	I31	2.89659	1.53299	0.34556
C05	Cy5	Pla2g4c	M KO	I23	26.9704	24.726	2.24433	2.34613		F WT	I32	2.7405	1.3769	0.385046
C06	Cy5	Pla2g4c			27.0883	24.6404	2.44793			F WT	I37	-2.50348	-3.86708	14.5917
C07	Cy5	Pla2g4c	M WT	I24	24.8595	23.9319	0.927637	0.952096		F WT	I44	2.50659	1.14299	0.452821
C08	Cy5	Pla2g4c			24.6457	23.6691	0.976555			F KO	I15	1.61175	0.248151	0.841975
C09	Cy5	Pla2g4c	M KO	I25	25.4585	24.1692	1.28928	1.31744		F KO	I16	1.6718	0.308198	0.80765	1.66212	2.07844	0.520877
C10	Cy5	Pla2g4c			25.0976	23.752	1.34561			F KO	I28	-1.36073	-2.72432	6.60851
C11	Cy5	Pla2g4c	M WT	I35	24.7475	23.6403	1.10727	1.14805		F KO	I29	2.46059	1.09699	0.467491
C12	Cy5	Pla2g4c			24.6732	23.4844	1.18883			F KO	I33	0.172883	-1.19072	2.28266
F01	Cy5	Pla2g4c	M WT	I36	24.2046	23.9933	0.211364	0.206871		F KO	I34	2.29084	0.92724	0.525864
F02	Cy5	Pla2g4c			24.1851	23.9828	0.202379			F KO	I38	-0.603368	-1.96697	3.90945
F03	Cy5	Pla2g4c	M WT	I39	23.8327	22.3605	1.4722	1.64633		F KO	I41	2.62664	1.26305	0.416663
F04	Cy5	Pla2g4c			24.1137	22.2932	1.82046			F KO	I42	2.42648	1.06288	0.478674
F05	Cy5	Pla2g4c	F WT	I11	23.6945	23.4475	0.247041	0.215218		F KO	I43	3.18857	1.82498	0.282246
F06	Cy5	Pla2g4c			23.7927	23.6093	0.183394
F07	Cy5	Pla2g4c	F WT	I13	23.5231	23.4398	0.0833332	0.0412878
F08	Cy5	Pla2g4c			23.5345	23.5353	-0.000757581
F09	Cy5	Pla2g4c	F WT	I14	25.221	23.2007	2.02023	2.03401
F10	Cy5	Pla2g4c			25.233	23.1852	2.0478
F11	Cy5	Pla2g4c	F KO	I15	25.7588	24.0013	1.75753	1.61175
F12	Cy5	Pla2g4c			25.6408	24.1749	1.46597
G09	Cy5	Pla2g4c	F KO	I16	23.8371	22.2313	1.60581	1.6718
G10	Cy5	Pla2g4c			23.9619	22.2241	1.73779
G11	Cy5	Pla2g4c	F WT	I26	22.4923	23.611	-1.11873	-1.1026
G12	Cy5	Pla2g4c			22.8093	23.8957	-1.08647
C01	Cy5	Pla2g4c	F WT	I17	25.1117	23.3385	1.77324	1.75991
C02	Cy5	Pla2g4c			24.9836	23.237	1.74658
C05	Cy5	Pla2g4c	F KO	I28	23.3663	24.7748	-1.40855	-1.36073
C06	Cy5	Pla2g4c			23.3917	24.7046	-1.3129
C07	Cy5	Pla2g4c	F KO	I29	27.182	24.7441	2.43791	2.46059
C08	Cy5	Pla2g4c			27.248	24.7647	2.48327
C09	Cy5	Pla2g4c	F WT	I30	25.5444	24.2412	1.30322	1.36209
C10	Cy5	Pla2g4c			25.2042	23.7832	1.42095
C11	Cy5	Pla2g4c	F WT	I31	25.5398	22.5179	3.02184	2.89659
C12	Cy5	Pla2g4c			25.535	22.7637	2.77134
F01	Cy5	Pla2g4c	F WT	I32	26.3533	23.7036	2.64967	2.7405
F02	Cy5	Pla2g4c			26.416	23.5847	2.83132
F03	Cy5	Pla2g4c	F KO	I33	23.0211	22.8913	0.12981	0.172883
F04	Cy5	Pla2g4c			22.9604	22.7445	0.215955
F05	Cy5	Pla2g4c	F KO	I34	24.7644	22.448	2.31638	2.29084
F06	Cy5	Pla2g4c			24.7508	22.4855	2.26529
F07	Cy5	Pla2g4c	F KO	I38	24.2027	24.7896	-0.5869	-0.603368
F08	Cy5	Pla2g4c			24.2613	24.8811	-0.619836
F11	Cy5	Pla2g4c	F KO	I41	25.1005	22.3836	2.71697	2.62664
F12	Cy5	Pla2g4c			24.9984	22.4621	2.53632
G09	Cy5	Pla2g4c	F WT	I37	22.0626	24.605	-2.54244	-2.50348
G10	Cy5	Pla2g4c			22.1927	24.6573	-2.46451
G11	Cy5	Pla2g4c	F KO	I42	26.0206	23.5546	2.46601	2.42648
G12	Cy5	Pla2g4c			26.2193	23.8323	2.38696
H09	Cy5	Pla2g4c	F KO	I43	26.4905	23.3369	3.15367	3.18857
H10	Cy5	Pla2g4c			26.5528	23.3293	3.22347
H11	Cy5	Pla2g4c	F WT	I44	26.0794	23.5308	2.54858	2.50659
H12	Cy5	Pla2g4c			26.2475	23.7829	2.46459
B01	FAM	Slfn1	M WT	I1	31.731	23.8966	7.83443	7.82979			Male	Ave. dCt	6.12685
B02	FAM	Slfn1			31.6006	23.7754	7.82514				Slfn1	dCt	ddCt	Fold Change	Ave. Fold	Std dev	Ttest
B03	FAM	Slfn1	M KO	I2	29.381	23.2558	6.12516	6.12874		M-WT	I1	7.82979	1.70294	0.30716	1.14016	0.589794
B04	FAM	Slfn1			29.3851	23.2528	6.13232			M-WT	I3	6.91456	0.787708	0.579263
B05	FAM	Slfn1	M WT	I3	31.3567	24.4462	6.91047	6.91456		M-WT	I4	4.83376	-1.29309	2.45052
B06	FAM	Slfn1			31.3469	24.4283	6.91865			M-WT	I6	5.90833	-0.218519	1.16354
B07	FAM	Slfn1	M WT	I4	28.9317	24.0434	4.88828	4.83376		M-WT	I9	5.23458	-0.89227	1.85609
B08	FAM	Slfn1			28.9389	24.1597	4.77924			M-WT	I10	6.42518	0.298329	0.813194
B09	FAM	Slfn1	M KO	I5	31.5142	24.3353	7.17885	7.27766		M-WT	I18	6.56725	0.440402	0.736929
B10	FAM	Slfn1			31.7546	24.3781	7.37647			M-WT	I20	5.69235	-0.434503	1.35145
B11	FAM	Slfn1	M WT	I6	29.1593	23.0612	6.09808	5.90833		M-WT	I22	6.02973	-0.0971197	1.06964
B12	FAM	Slfn1			29.0743	23.3557	5.71859			M-WT	I24	6.74672	0.619869	0.65073
E01	FAM	Slfn1	M KO	I7	31.6138	25.5605	6.05335	5.89621		M-WT	I35	5.43509	-0.691759	1.61525
E02	FAM	Slfn1			31.1262	25.3871	5.73907			M-WT	I36	5.65394	-0.47291	1.38791
E03	FAM	Slfn1	M KO	I8	30.8504	23.6748	7.17559	7.24077		M-WT	I39	6.37778	0.250926	0.840357
E04	FAM	Slfn1			31.0656	23.7597	7.30596			M-KO	I2	6.12874	0.00188778	0.998692	0.932872	0.330743	0.352782
E05	FAM	Slfn1	M WT	I9	29.4071	24.2557	5.15136	5.23458		M-KO	I5	7.27766	1.15081	0.450372
E06	FAM	Slfn1			29.58	24.2622	5.3178			M-KO	I7	5.89621	-0.230643	1.17336
E07	FAM	Slfn1	M WT	I10	31.094	24.5588	6.53527	6.42518		M-KO	I8	7.24077	1.11392	0.462036
E08	FAM	Slfn1			30.9286	24.6135	6.31509			M-KO	I12	6.36487	0.238017	0.84791
E09	FAM	Slfn1	M KO	I12	30.3953	24.0752	6.32006	6.36487		M-KO	I19	6.31948	0.192631	0.875008
E10	FAM	Slfn1			30.3685	23.9589	6.40967			M-KO	I21	5.74852	-0.378332	1.29984
E11	FAM	Slfn1	M WT	I18	31.8149	25.3575	6.4574	6.56725		M-KO	I23	6.28608	0.159228	0.895504
E12	FAM	Slfn1			32.1067	25.4296	6.67711			M-KO	I25	5.64852	-0.478333	1.39313
G05	FAM	Slfn1	M KO	I19	30.9368	24.6279	6.30892	6.31948
G06	FAM	Slfn1			30.8973	24.5673	6.33004				Female	Ave. dCt	6.22869
G07	FAM	Slfn1	M WT	I20	30.376	24.7211	5.65486	5.69235			Slfn1	dCt	ddCt	Fold Change	Ave. Fold	Std dev	Ttest
G08	FAM	Slfn1			30.4774	24.7475	5.72983			F WT	I27	7.05905	0.830356	0.56239	1.17142	0.647259
H01	FAM	Slfn1	F WT	I27	31.5593	24.5422	7.01716	7.05905		F WT	I40	6.53865	0.30996	0.806664
H02	FAM	Slfn1			31.696	24.595	7.10094			F WT	I11	7.22772	0.999027	0.500337
H03	FAM	Slfn1	F WT	I40	30.9664	24.3977	6.56875	6.53865		F WT	I13	5.45164	-0.777055	1.71363
H04	FAM	Slfn1			30.8781	24.3695	6.50856			F WT	I14	6.24282	0.0141262	0.990256
B01	FAM	Slfn1	M KO	I21	29.8928	24.1575	5.73526	5.74852		F WT	I26	5.71796	-0.510733	1.42477
B02	FAM	Slfn1			29.5745	23.8128	5.76178			F WT	I17	5.88116	-0.347535	1.27238
B03	FAM	Slfn1	M WT	I22	30.1621	24.1514	6.01066	6.02973		F WT	I30	5.02419	-1.2045	2.30457
B04	FAM	Slfn1			30.2837	24.2349	6.0488			F WT	I31	7.81092	1.58223	0.333965
B05	FAM	Slfn1	M KO	I23	31.2582	25.0956	6.16258	6.28608		F WT	I32	6.89375	0.665061	0.630662
B06	FAM	Slfn1			31.2641	24.8545	6.40958			F WT	I37	5.13353	-1.09517	2.13638
B07	FAM	Slfn1	M WT	I24	30.6638	23.9103	6.75354	6.74672		F WT	I44	5.76292	-0.465773	1.38106
B08	FAM	Slfn1			30.6912	23.9513	6.7399			F KO	I15	5.52482	-0.703873	1.62887
B09	FAM	Slfn1	M KO	I25	29.6328	24.0652	5.56761	5.64852		F KO	I16	5.82362	-0.405069	1.32415	1.35237	0.653939	0.523168
B10	FAM	Slfn1			29.5527	23.8232	5.72942			F KO	I28	4.9733	-1.25539	2.38731
B11	FAM	Slfn1	M WT	I35	29.0002	23.539	5.46122	5.43509		F KO	I29	6.13818	-0.0905099	1.06475
B12	FAM	Slfn1			29.062	23.6531	5.40896			F KO	I33	6.55386	0.325165	0.798207
E01	FAM	Slfn1	M WT	I36	29.7546	24.1162	5.63839	5.65394		F KO	I34	7.7354	1.50671	0.351914
E02	FAM	Slfn1			29.5088	23.8393	5.66949			F KO	I38	6.5845	0.355802	0.781435
E03	FAM	Slfn1	M WT	I39	28.9659	22.4805	6.48538	6.37778		F KO	I41	5.73995	-0.488745	1.40322
E04	FAM	Slfn1			28.9094	22.6392	6.27017			F KO	I42	5.69731	-0.531386	1.44532
E05	FAM	Slfn1	F WT	I11	30.8753	23.6444	7.23094	7.22772		F KO	I43	5.00312	-1.22558	2.33849
E06	FAM	Slfn1			30.7385	23.514	7.22451
E07	FAM	Slfn1	F WT	I13	29.282	23.7525	5.52949	5.45164
E08	FAM	Slfn1			29.2277	23.8539	5.37378
E09	FAM	Slfn1	F WT	I14	29.5792	23.3829	6.19628	6.24282
E10	FAM	Slfn1			29.6653	23.376	6.28936
E11	FAM	Slfn1	F KO	I15	29.7314	24.2438	5.48764	5.52482
E12	FAM	Slfn1			29.9306	24.3686	5.562
G05	FAM	Slfn1	F KO	I16	28.1982	22.436	5.76222	5.82362
G06	FAM	Slfn1			28.2091	22.3241	5.88503
G07	FAM	Slfn1	F WT	I26	29.144	23.352	5.79194	5.71796
G08	FAM	Slfn1			29.2915	23.6475	5.64398
B01	FAM	Slfn1	F WT	I17	29.2735	23.3372	5.93628	5.88116
B02	FAM	Slfn1			29.1414	23.3154	5.82604
B05	FAM	Slfn1	F KO	I28	30.1668	25.244	4.92284	4.9733
B06	FAM	Slfn1			30.1979	25.1741	5.02377
B07	FAM	Slfn1	F KO	I29	31.1642	24.9451	6.21908	6.13818
B08	FAM	Slfn1			31.0601	25.0028	6.05729
B09	FAM	Slfn1	F WT	I30	29.0743	24.0406	5.03378	5.02419
B10	FAM	Slfn1			29.1807	24.1661	5.01461
B11	FAM	Slfn1	F WT	I31	30.7746	23.0203	7.75431	7.81092
B12	FAM	Slfn1			30.8689	23.0014	7.86753
E01	FAM	Slfn1	F WT	I32	30.985	23.9829	7.00211	6.89375
E02	FAM	Slfn1			30.4618	23.6764	6.7854
E03	FAM	Slfn1	F KO	I33	29.5753	23.028	6.54727	6.55386
E04	FAM	Slfn1			29.6111	23.0506	6.56045
E05	FAM	Slfn1	F KO	I34	30.4955	22.7987	7.69679	7.7354
E06	FAM	Slfn1			30.3872	22.6132	7.774
E07	FAM	Slfn1	F KO	I38	31.6715	25.1054	6.56612	6.5845
E08	FAM	Slfn1			31.6815	25.0786	6.60287
E11	FAM	Slfn1	F KO	I41	28.2236	22.5558	5.66786	5.73995
E12	FAM	Slfn1			28.5497	22.7377	5.81204
G05	FAM	Slfn1	F WT	I37	30.0667	24.8492	5.21753	5.13353
G06	FAM	Slfn1			29.8625	24.8129	5.04952
G07	FAM	Slfn1	F KO	I42	29.2064	23.5674	5.63894	5.69731
G08	FAM	Slfn1			29.3223	23.5666	5.75568
H05	FAM	Slfn1	F KO	I43	28.2446	23.2026	5.04195	5.00312
H06	FAM	Slfn1			28.2329	23.2686	4.96428
H07	FAM	Slfn1	F WT	I44	29.4947	23.7086	5.78613	5.76292
H08	FAM	Slfn1			29.4389	23.6992	5.73971
A01	HEX	Slfn2	M WT	I1	26.242	23.8966	2.34541	2.45686			Male	Ave. dCt	0.904394
A02	HEX	Slfn2			26.3438	23.7754	2.56832				Slfn2	dCt	ddCt	Fold Change	Ave. Fold	Std dev	Ttest
A03	HEX	Slfn2	M KO	I2	24.4387	23.2558	1.18286	1.17059		M-WT	I1	2.45686	1.55247	0.340926	1.19114	0.775055
A04	HEX	Slfn2			24.4111	23.2528	1.15833			M-WT	I3	1.79063	0.886237	0.541023
A05	HEX	Slfn2	M WT	I3	26.294	24.4462	1.84779	1.79063		M-WT	I4	-0.142615	-1.04701	2.06624
A06	HEX	Slfn2			26.1618	24.4283	1.73347			M-WT	I6	1.51064	0.606245	0.656904
A07	HEX	Slfn2	M WT	I4	24.0993	24.0434	0.0559199	-0.142615		M-WT	I9	0.624407	-0.279987	1.21418
A08	HEX	Slfn2			23.8185	24.1597	-0.34115			M-WT	I10	-0.744682	-1.64908	3.13633
A09	HEX	Slfn2	M KO	I5	27.0714	24.3353	2.73609	2.64579		M-WT	I18	1.07337	0.168973	0.889476
A10	HEX	Slfn2			26.9336	24.3781	2.55549			M-WT	I20	0.948084	0.0436905	0.97017
A11	HEX	Slfn2	M WT	I6	24.6163	23.0612	1.55509	1.51064		M-WT	I22	1.20311	0.298712	0.812978
A12	HEX	Slfn2			24.8219	23.3557	1.46619			M-WT	I24	1.7247	0.820302	0.566323
D01	HEX	Slfn2	M KO	I7	26.0749	25.5605	0.514447	0.496385		M-WT	I35	0.0281813	-0.876213	1.83555
D02	HEX	Slfn2			25.8654	25.3871	0.478322			M-WT	I36	0.330503	-0.573891	1.48853
D03	HEX	Slfn2	M KO	I8	25.7294	23.6748	2.05453	2.01349		M-WT	I39	0.95394	0.0495461	0.96624
D04	HEX	Slfn2			25.7321	23.7597	1.97245			M-KO	I2	1.17059	0.266201	0.831506	0.995444	0.416504	0.499118
D05	HEX	Slfn2	M WT	I9	24.8474	24.2557	0.591731	0.624407		M-KO	I5	2.64579	1.74139	0.299081
D06	HEX	Slfn2			24.9193	24.2622	0.657083			M-KO	I7	0.496385	-0.408009	1.32685
D07	HEX	Slfn2	M WT	I10	23.8502	24.5588	-0.708569	-0.744682		M-KO	I8	2.01349	1.10909	0.463585
D08	HEX	Slfn2			23.8327	24.6135	-0.780795			M-KO	I12	0.493181	-0.411213	1.3298
D09	HEX	Slfn2	M KO	I12	24.5478	24.0752	0.472529	0.493181		M-KO	I19	0.589575	-0.314818	1.24386
D10	HEX	Slfn2			24.4727	23.9589	0.513833			M-KO	I21	0.586733	-0.31766	1.24631
D11	HEX	Slfn2	M WT	I18	26.3833	25.3575	1.02581	1.07337		M-KO	I23	1.26928	0.364882	0.776532
D12	HEX	Slfn2			26.5505	25.4296	1.12092			M-KO	I25	0.376851	-0.527543	1.44147
G01	HEX	Slfn2	M KO	I19	25.261	24.6279	0.633174	0.589575
G02	HEX	Slfn2			25.1133	24.5673	0.545976				Female	Ave. dCt	0.70262
G03	HEX	Slfn2	M WT	I20	25.5583	24.7211	0.837166	0.948084			Slfn2	dCt	ddCt	Fold Change	Ave. Fold	Std dev	Ttest
G04	HEX	Slfn2			25.8065	24.7475	1.059			F WT	I27	-0.792199	-1.49482	2.81829	1.19689	0.734668
F01	HEX	Slfn2	F WT	I27	23.8763	24.5422	-0.665839	-0.792199		F WT	I40	-0.186005	-0.888625	1.85141
F02	HEX	Slfn2			23.6765	24.595	-0.918559			F WT	I11	2.01507	1.31245	0.402636
F03	HEX	Slfn2	F WT	I40	24.1428	24.3977	-0.254885	-0.186005		F WT	I13	0.608638	-0.0939814	1.06731
F04	HEX	Slfn2			24.2524	24.3695	-0.117125			F WT	I14	0.251272	-0.451348	1.36732
A01	HEX	Slfn2	M KO	I21	24.4861	24.1575	0.328564	0.586733		F WT	I26	0.898827	0.196207	0.872843
A02	HEX	Slfn2			24.6577	23.8128	0.844903			F WT	I17	1.07556	0.37294	0.772207
A03	HEX	Slfn2	M WT	I22	25.3891	24.1514	1.23763	1.20311		F WT	I30	0.174339	-0.528281	1.44221
A04	HEX	Slfn2			25.4035	24.2349	1.16858			F WT	I31	2.1614	1.45878	0.363799
A05	HEX	Slfn2	M KO	I23	26.2829	25.0956	1.18732	1.26928		F WT	I32	1.68188	0.979261	0.507239
A06	HEX	Slfn2			26.2058	24.8545	1.35123			F WT	I37	-0.281699	-0.984319	1.97838
A07	HEX	Slfn2	M WT	I24	25.6756	23.9103	1.76534	1.7247		F WT	I44	0.824347	0.121728	0.919086
A08	HEX	Slfn2			25.6353	23.9513	1.68405			F KO	I15	1.20286	0.500236	0.706991
A09	HEX	Slfn2	M KO	I25	24.3699	24.0652	0.304736	0.376851		F KO	I16	0.995106	0.292486	0.816494	1.00057	0.493939	0.480448
A10	HEX	Slfn2			24.2722	23.8232	0.448966			F KO	I28	-0.175151	-0.877771	1.83753
A11	HEX	Slfn2	M WT	I35	23.5279	23.539	-0.0110999	0.0281813		F KO	I29	-0.122967	-0.825587	1.77226
A12	HEX	Slfn2			23.7205	23.6531	0.0674625			F KO	I33	1.05431	0.351686	0.783668
D01	HEX	Slfn2	M WT	I36	24.3814	24.1162	0.265251	0.330503		F KO	I34	2.33366	1.63104	0.322854
D02	HEX	Slfn2			24.235	23.8393	0.395755			F KO	I38	1.03056	0.327941	0.796673
D03	HEX	Slfn2	M WT	I39	23.5518	22.4805	1.07134	0.95394		F KO	I41	1.09627	0.393654	0.761199
D04	HEX	Slfn2			23.4757	22.6392	0.836543			F KO	I42	0.976015	0.273395	0.82737
D05	HEX	Slfn2	F WT	I11	25.6052	23.6444	1.96086	2.01507		F KO	I43	0.237234	-0.465386	1.38069
D06	HEX	Slfn2			25.5832	23.514	2.06929
D07	HEX	Slfn2	F WT	I13	24.3732	23.7525	0.620715	0.608638
D08	HEX	Slfn2			24.4505	23.8539	0.596562
D09	HEX	Slfn2	F WT	I14	23.6669	23.3829	0.283938	0.251272
D10	HEX	Slfn2			23.5946	23.376	0.218607
D11	HEX	Slfn2	F KO	I15	25.4604	24.2438	1.2166	1.20286
D12	HEX	Slfn2			25.5577	24.3686	1.18911
G01	HEX	Slfn2	F KO	I16	23.4261	22.436	0.990034	0.995106
G02	HEX	Slfn2			23.3243	22.3241	1.00018
G03	HEX	Slfn2	F WT	I26	24.4605	23.352	1.1085	0.898827
G04	HEX	Slfn2			24.3366	23.6475	0.689149
A01	HEX	Slfn2	F WT	I17	24.3304	23.3372	0.993247	1.07556
A02	HEX	Slfn2			24.4732	23.3154	1.15787
A05	HEX	Slfn2	F KO	I28	25.0394	25.244	-0.204608	-0.175151
A06	HEX	Slfn2			25.0284	25.1741	-0.145693
A07	HEX	Slfn2	F KO	I29	24.7794	24.9451	-0.165739	-0.122967
A08	HEX	Slfn2			24.9226	25.0028	-0.0801953
A09	HEX	Slfn2	F WT	I30	24.2027	24.0406	0.162163	0.174339
A10	HEX	Slfn2			24.3526	24.1661	0.186514
A11	HEX	Slfn2	F WT	I31	25.1334	23.0203	2.11314	2.1614
A12	HEX	Slfn2			25.211	23.0014	2.20967
D01	HEX	Slfn2	F WT	I32	25.7258	23.9829	1.74289	1.68188
D02	HEX	Slfn2			25.2973	23.6764	1.62087
D03	HEX	Slfn2	F KO	I33	24.0423	23.028	1.0143	1.05431
D04	HEX	Slfn2			24.1449	23.0506	1.09431
D05	HEX	Slfn2	F KO	I34	25.0286	22.7987	2.22994	2.33366
D06	HEX	Slfn2			25.0506	22.6132	2.43739
D07	HEX	Slfn2	F KO	I38	26.1434	25.1054	1.03801	1.03056
D08	HEX	Slfn2			26.1017	25.0786	1.02311
D11	HEX	Slfn2	F KO	I41	23.6812	22.5558	1.12547	1.09627
D12	HEX	Slfn2			23.8048	22.7377	1.06708
G01	HEX	Slfn2	F WT	I37	24.6004	24.8492	-0.24873	-0.281699
G02	HEX	Slfn2			24.4983	24.8129	-0.314668
G03	HEX	Slfn2	F KO	I42	24.5811	23.5674	1.01369	0.976015
G04	HEX	Slfn2			24.5049	23.5666	0.938342
H01	HEX	Slfn2	F KO	I43	23.5064	23.2026	0.303769	0.237234
H02	HEX	Slfn2			23.4393	23.2686	0.170698
H03	HEX	Slfn2	F WT	I44	24.4582	23.7086	0.749663	0.824347
H04	HEX	Slfn2			24.5982	23.6992	0.899032
A01	Cy5	Slfn5	M WT	I1	27.6219	23.8966	3.72534	3.96366			Male	Ave. dCt	3.99453
A02	Cy5	Slfn5			27.9774	23.7754	4.20197				Slfn5	dCt	ddCt	Fold Change	Ave. Fold	Std dev	Ttest
A03	Cy5	Slfn5	M KO	I2	27.418	23.2558	4.16216	4.1645		M-WT	I1	3.96366	-0.0308731	1.02163	1.1371	0.626686
A04	Cy5	Slfn5			27.4196	23.2528	4.16684			M-WT	I3	3.87969	-0.114834	1.08285
A05	Cy5	Slfn5	M WT	I3	28.4059	24.4462	3.95973	3.87969		M-WT	I4	3.15729	-0.837235	1.78662
A06	Cy5	Slfn5			28.2279	24.4283	3.79966			M-WT	I6	4.60502	0.610488	0.654975
A07	Cy5	Slfn5	M WT	I4	27.35	24.0434	3.30657	3.15729		M-WT	I9	4.32095	0.326426	0.797509
A08	Cy5	Slfn5			27.1677	24.1597	3.00802			M-WT	I10	2.87025	-1.12427	2.17992
A09	Cy5	Slfn5	M KO	I5	29.6889	24.3353	5.3536	5.28729		M-WT	I18	4.93533	0.940801	0.520943
A10	Cy5	Slfn5			29.5991	24.3781	5.22098			M-WT	I20	4.39398	0.399456	0.758144
A11	Cy5	Slfn5	M WT	I6	27.7512	23.0612	4.68998	4.60502		M-WT	I22	4.38998	0.395448	0.760253
A12	Cy5	Slfn5			27.8758	23.3557	4.52006			M-WT	I24	4.71972	0.725192	0.604916
D01	Cy5	Slfn5	M KO	I7	28.5018	25.5605	2.94127	3.02965		M-WT	I35	2.80272	-1.1918	2.28438
D02	Cy5	Slfn5			28.5052	25.3871	3.11804			M-WT	I36	3.22865	-0.765876	1.7004
D03	Cy5	Slfn5	M KO	I8	29.1126	23.6748	5.43778	5.41964		M-WT	I39	4.66161	0.667085	0.629778
D04	Cy5	Slfn5			29.1612	23.7597	5.4015			M-KO	I2	4.1645	0.16997	0.888861	1.28958	0.681082	0.593933
D05	Cy5	Slfn5	M WT	I9	28.5028	24.2557	4.24706	4.32095		M-KO	I5	5.28729	1.29276	0.408168
D06	Cy5	Slfn5			28.657	24.2622	4.39485			M-KO	I7	3.02965	-0.964874	1.95189
D07	Cy5	Slfn5	M WT	I10	27.3349	24.5588	2.77612	2.87025		M-KO	I8	5.41964	1.42511	0.37239
D08	Cy5	Slfn5			27.5779	24.6135	2.96439			M-KO	I12	3.28894	-0.705585	1.63081
D09	Cy5	Slfn5	M KO	I12	27.4498	24.0752	3.37453	3.28894		M-KO	I19	2.73405	-1.26048	2.39575
D10	Cy5	Slfn5			27.1622	23.9589	3.20336			M-KO	I21	3.40646	-0.588072	1.50324
D11	Cy5	Slfn5	M WT	I18	30.0753	25.3575	4.71785	4.93533		M-KO	I23	3.9892	-0.00533058	1.0037
D12	Cy5	Slfn5			30.5824	25.4296	5.1528			M-KO	I25	3.45707	-0.537456	1.45141
G01	Cy5	Slfn5	M KO	I19	27.3826	24.6279	2.75475	2.73405
G02	Cy5	Slfn5			27.2806	24.5673	2.71335				Female	Ave. dCt	3.91801
G03	Cy5	Slfn5	M WT	I20	29.1775	24.7211	4.45635	4.39398			Slfn5	dCt	ddCt	Fold Change	Ave. Fold	Std dev	Ttest
G04	Cy5	Slfn5			29.0791	24.7475	4.33162			F WT	I27	3.23925	-0.67876	1.60076	1.24868	0.970747
F01	Cy5	Slfn5	F WT	I27	27.5392	24.5422	2.99699	3.23925		F WT	I40	3.83718	-0.0808304	1.05763
F02	Cy5	Slfn5			28.0765	24.595	3.4815			F WT	I11	4.19868	0.280672	0.823207
F03	Cy5	Slfn5	F WT	I40	28.2264	24.3977	3.82869	3.83718		F WT	I13	2.84255	-1.07546	2.10739
F04	Cy5	Slfn5			28.2152	24.3695	3.84567			F WT	I14	1.98347	-1.93453	3.82255
A01	Cy5	Slfn5	M KO	I21	27.3064	24.1575	3.14893	3.40646		F WT	I26	3.83298	-0.0850239	1.06071
A02	Cy5	Slfn5			27.4768	23.8128	3.66399			F WT	I17	4.54198	0.623972	0.648882
A03	Cy5	Slfn5	M WT	I22	28.6137	24.1514	4.46229	4.38998		F WT	I30	4.35944	0.441432	0.736403
A04	Cy5	Slfn5			28.5525	24.2349	4.31766			F WT	I31	5.21809	1.30008	0.406103
A05	Cy5	Slfn5	M KO	I23	28.911	25.0956	3.81536	3.9892		F WT	I32	5.16019	1.24219	0.422732
A06	Cy5	Slfn5			29.0176	24.8545	4.16303			F WT	I37	3.15821	-0.759793	1.69325
A07	Cy5	Slfn5	M WT	I24	28.6529	23.9103	4.7426	4.71972		F WT	I44	4.64406	0.726056	0.604554
A08	Cy5	Slfn5			28.6481	23.9513	4.69684			F KO	I15	3.89936	-0.0186492	1.01301
A09	Cy5	Slfn5	M KO	I25	27.5591	24.0652	3.49396	3.45707		F KO	I16	3.28952	-0.628487	1.54594	1.03647	0.50293	0.540088
A10	Cy5	Slfn5			27.2434	23.8232	3.42019			F KO	I28	2.85521	-1.0628	2.08898
A11	Cy5	Slfn5	M WT	I35	26.3228	23.539	2.78384	2.80272		F KO	I29	3.45586	-0.462148	1.37759
A12	Cy5	Slfn5			26.4747	23.6531	2.82161			F KO	I33	4.31711	0.399101	0.758331
D01	Cy5	Slfn5	M WT	I36	27.1769	24.1162	3.06072	3.22865		F KO	I34	5.1088	1.19079	0.438063
D02	Cy5	Slfn5			27.2359	23.8393	3.39659			F KO	I38	3.89623	-0.0217744	1.01521
D03	Cy5	Slfn5	M WT	I39	27.2293	22.4805	4.74883	4.66161		F KO	I41	4.69413	0.776122	0.583934
D04	Cy5	Slfn5			27.2136	22.6392	4.5744			F KO	I42	4.44032	0.522315	0.696254
D05	Cy5	Slfn5	F WT	I11	27.7892	23.6444	4.14481	4.19868		F KO	I43	4.15689	0.238885	0.8474
D06	Cy5	Slfn5			27.7665	23.514	4.25255
D07	Cy5	Slfn5	F WT	I13	26.6652	23.7525	2.91274	2.84255
D08	Cy5	Slfn5			26.6263	23.8539	2.77236
D09	Cy5	Slfn5	F WT	I14	25.3376	23.3829	1.95472	1.98347
D10	Cy5	Slfn5			25.3882	23.376	2.01223
D11	Cy5	Slfn5	F KO	I15	28.2759	24.2438	4.03206	3.89936
D12	Cy5	Slfn5			28.1352	24.3686	3.76665
G01	Cy5	Slfn5	F KO	I16	25.7007	22.436	3.26467	3.28952
G02	Cy5	Slfn5			25.6385	22.3241	3.31437
G03	Cy5	Slfn5	F WT	I26	27.3727	23.352	4.02069	3.83298
G04	Cy5	Slfn5			27.2928	23.6475	3.64528
A01	Cy5	Slfn5	F WT	I17	27.7553	23.3372	4.41809	4.54198
A02	Cy5	Slfn5			27.9812	23.3154	4.66587
A05	Cy5	Slfn5	F KO	I28	28.1082	25.244	2.86427	2.85521
A06	Cy5	Slfn5			28.0203	25.1741	2.84615
A07	Cy5	Slfn5	F KO	I29	28.4346	24.9451	3.48945	3.45586
A08	Cy5	Slfn5			28.4251	25.0028	3.42227
A09	Cy5	Slfn5	F WT	I30	28.3781	24.0406	4.33755	4.35944
A10	Cy5	Slfn5			28.5474	24.1661	4.38133
A11	Cy5	Slfn5	F WT	I31	28.1631	23.0203	5.14281	5.21809
A12	Cy5	Slfn5			28.2947	23.0014	5.29338
D01	Cy5	Slfn5	F WT	I32	29.2778	23.9829	5.29485	5.16019
D02	Cy5	Slfn5			28.7019	23.6764	5.02553
D03	Cy5	Slfn5	F KO	I33	27.1737	23.028	4.1457	4.31711
D04	Cy5	Slfn5			27.5392	23.0506	4.48851
D05	Cy5	Slfn5	F KO	I34	27.8377	22.7987	5.039	5.1088
D06	Cy5	Slfn5			27.7918	22.6132	5.17859
D07	Cy5	Slfn5	F KO	I38	29.0175	25.1054	3.91215	3.89623
D08	Cy5	Slfn5			28.9589	25.0786	3.88031
D11	Cy5	Slfn5	F KO	I41	27.3173	22.5558	4.76155	4.69413
D12	Cy5	Slfn5			27.3644	22.7377	4.62671
G01	Cy5	Slfn5	F WT	I37	28.0054	24.8492	3.15618	3.15821
G02	Cy5	Slfn5			27.9732	24.8129	3.16025
G03	Cy5	Slfn5	F KO	I42	28.0154	23.5674	4.448	4.44032
G04	Cy5	Slfn5			27.9992	23.5666	4.43265
H01	Cy5	Slfn5	F KO	I43	27.4038	23.2026	4.20116	4.15689
H02	Cy5	Slfn5			27.3812	23.2686	4.11262
H03	Cy5	Slfn5	F WT	I44	28.2961	23.7086	4.58751	4.64406
H04	Cy5	Slfn5			28.3998	23.6992	4.70062
A01	FAM	Slfn8	M WT	I1	26.5326	23.8966	2.63607	2.81913			Male	Ave. dCt	2.02
A02	FAM	Slfn8			26.7776	23.7754	3.00219				Slfn8	dCt	ddCt	Fold Change	Ave. Fold	Std dev	Ttest
A03	FAM	Slfn8	M KO	I2	25.39	23.2558	2.13416	2.10011		M-WT	I1	2.81913	0.799123	0.574698	1.10333	0.516358
A04	FAM	Slfn8			25.3189	23.2528	2.06606			M-WT	I3	2.98653	0.966531	0.511735
A05	FAM	Slfn8	M WT	I3	27.4351	24.4462	2.98891	2.98653		M-WT	I4	1.17608	-0.84392	1.79492
A06	FAM	Slfn8			27.4125	24.4283	2.98416			M-WT	I6	2.30352	0.283521	0.821584
A07	FAM	Slfn8	M WT	I4	25.325	24.0434	1.28159	1.17608		M-WT	I9	1.63327	-0.386735	1.30743
A08	FAM	Slfn8			25.2302	24.1597	1.07058			M-WT	I10	2.67159	0.651583	0.636582
A09	FAM	Slfn8	M KO	I5	28.2152	24.3353	3.87982	3.67582		M-WT	I18	1.80546	-0.214548	1.16034
A10	FAM	Slfn8			27.8499	24.3781	3.47182			M-WT	I20	2.20227	0.182271	0.881315
A11	FAM	Slfn8	M WT	I6	25.4525	23.0612	2.39134	2.30352		M-WT	I22	2.28616	0.266159	0.83153
A12	FAM	Slfn8			25.5714	23.3557	2.21571			M-WT	I24	2.54638	0.526377	0.694296
D01	FAM	Slfn8	M KO	I7	27.7451	25.5605	2.1846	2.22075		M-WT	I35	1.24798	-0.772023	1.70766
D02	FAM	Slfn8			27.644	25.3871	2.25689			M-WT	I36	1.65437	-0.365638	1.28845
D03	FAM	Slfn8	M KO	I8	26.5436	23.6748	2.86874	2.80828		M-WT	I39	0.927302	-1.0927	2.13273
D04	FAM	Slfn8			26.5075	23.7597	2.74782			M-KO	I2	2.10011	0.0801065	0.945988	0.735588	0.19847	0.056645
D05	FAM	Slfn8	M WT	I9	25.7803	24.2557	1.52462	1.63327		M-KO	I5	3.67582	1.65582	0.317358
D06	FAM	Slfn8			26.0041	24.2622	1.74192			M-KO	I7	2.22075	0.200743	0.870102
D07	FAM	Slfn8	M WT	I10	27.1881	24.5588	2.6293	2.67159		M-KO	I8	2.80828	0.788276	0.579036
D08	FAM	Slfn8			27.3274	24.6135	2.71388			M-KO	I12	2.2592	0.239197	0.847217
D09	FAM	Slfn8	M KO	I12	26.2685	24.0752	2.19328	2.2592		M-KO	I19	2.44097	0.420965	0.746925
D10	FAM	Slfn8			26.284	23.9589	2.32513			M-KO	I21	2.23728	0.217278	0.860187
D11	FAM	Slfn8	M WT	I18	27.0612	25.3575	1.70374	1.80546		M-KO	I23	2.2738	0.253799	0.838685
D12	FAM	Slfn8			27.3367	25.4296	1.90717			M-KO	I25	2.72183	0.701827	0.614793
G01	FAM	Slfn8	M KO	I19	27.0645	24.6279	2.4366	2.44097
G02	FAM	Slfn8			27.0126	24.5673	2.44533				Female	Ave. dCt	2.16813
G03	FAM	Slfn8	M WT	I20	26.8952	24.7211	2.17403	2.20227			Slfn8	dCt	ddCt	Fold Change	Ave. Fold	Std dev	Ttest
G04	FAM	Slfn8			26.978	24.7475	2.23051			F WT	I27	2.69938	0.531245	0.691957	1.03225	0.264317
F01	FAM	Slfn8	F WT	I27	27.3149	24.5422	2.77277	2.69938		F WT	I40	2.62344	0.455311	0.729353
F02	FAM	Slfn8			27.221	24.595	2.62599			F WT	I11	2.02819	-0.13994	1.10186
F03	FAM	Slfn8	F WT	I40	26.9542	24.3977	2.55657	2.62344		F WT	I13	1.54849	-0.619638	1.53649
F04	FAM	Slfn8			27.0598	24.3695	2.69031			F WT	I14	1.83852	-0.329612	1.25668
A01	FAM	Slfn8	M KO	I21	26.1282	24.1575	1.97072	2.23728		F WT	I26	2.81476	0.646628	0.638772
A02	FAM	Slfn8			26.3166	23.8128	2.50384			F WT	I17	2.04929	-0.118836	1.08586
A03	FAM	Slfn8	M WT	I22	26.5024	24.1514	2.35098	2.28616		F WT	I30	2.37819	0.210061	0.864501
A04	FAM	Slfn8			26.4562	24.2349	2.22134			F WT	I31	1.89698	-0.271155	1.20677
A05	FAM	Slfn8	M KO	I23	27.2692	25.0956	2.17357	2.2738		F WT	I32	2.21098	0.0428443	0.970739
A06	FAM	Slfn8			27.2286	24.8545	2.37403			F WT	I37	1.91862	-0.249516	1.18881
A07	FAM	Slfn8	M WT	I24	26.5263	23.9103	2.61596	2.54638		F WT	I44	2.01074	-0.157392	1.11527
A08	FAM	Slfn8			26.4281	23.9513	2.4768			F KO	I15	1.92667	-0.241461	1.18219
A09	FAM	Slfn8	M KO	I25	26.7694	24.0652	2.70416	2.72183		F KO	I16	1.79873	-0.3694	1.29182	0.987525	0.316155	0.72135
A10	FAM	Slfn8			26.5627	23.8232	2.7395			F KO	I28	1.95137	-0.216761	1.16212
A11	FAM	Slfn8	M WT	I35	24.765	23.539	1.22603	1.24798		F KO	I29	2.89663	0.728498	0.603532
A12	FAM	Slfn8			24.923	23.6531	1.26994			F KO	I33	2.06347	-0.104659	1.07524
D01	FAM	Slfn8	M WT	I36	25.6381	24.1162	1.52195	1.65437		F KO	I34	2.96924	0.801105	0.573909
D02	FAM	Slfn8			25.626	23.8393	1.78678			F KO	I38	2.79853	0.630402	0.645996
D03	FAM	Slfn8	M WT	I39	23.5055	22.4805	1.02503	0.927302		F KO	I41	2.40855	0.240422	0.846498
D04	FAM	Slfn8			23.4688	22.6392	0.829574			F KO	I42	2.19546	0.0273286	0.981236
D05	FAM	Slfn8	F WT	I11	25.5878	23.6444	1.94343	2.02819		F KO	I43	1.57099	-0.597138	1.51271
D06	FAM	Slfn8			25.6269	23.514	2.11296
D07	FAM	Slfn8	F WT	I13	25.3279	23.7525	1.57539	1.54849
D08	FAM	Slfn8			25.3755	23.8539	1.5216
D09	FAM	Slfn8	F WT	I14	25.2499	23.3829	1.86698	1.83852
D10	FAM	Slfn8			25.186	23.376	1.81006
D11	FAM	Slfn8	F KO	I15	26.2084	24.2438	1.96461	1.92667
D12	FAM	Slfn8			26.2573	24.3686	1.88873
G01	FAM	Slfn8	F KO	I16	24.2259	22.436	1.78983	1.79873
G02	FAM	Slfn8			24.1317	22.3241	1.80763
G03	FAM	Slfn8	F WT	I26	26.3578	23.352	3.00574	2.81476
G04	FAM	Slfn8			26.2713	23.6475	2.62378
A01	FAM	Slfn8	F WT	I17	25.2569	23.3372	1.91969	2.04929
A02	FAM	Slfn8			25.4943	23.3154	2.1789
A05	FAM	Slfn8	F KO	I28	27.2361	25.244	1.99219	1.95137
A06	FAM	Slfn8			27.0847	25.1741	1.91055
A07	FAM	Slfn8	F KO	I29	27.789	24.9451	2.84383	2.89663
A08	FAM	Slfn8			27.9522	25.0028	2.94942
A09	FAM	Slfn8	F WT	I30	26.4706	24.0406	2.43002	2.37819
A10	FAM	Slfn8			26.4925	24.1661	2.32637
A11	FAM	Slfn8	F WT	I31	24.8066	23.0203	1.78629	1.89698
A12	FAM	Slfn8			25.009	23.0014	2.00766
D01	FAM	Slfn8	F WT	I32	26.1982	23.9829	2.21533	2.21098
D02	FAM	Slfn8			25.883	23.6764	2.20663
D03	FAM	Slfn8	F KO	I33	25.0949	23.028	2.06683	2.06347
D04	FAM	Slfn8			25.1107	23.0506	2.06011
D05	FAM	Slfn8	F KO	I34	25.7085	22.7987	2.90982	2.96924
D06	FAM	Slfn8			25.6419	22.6132	3.02865
D07	FAM	Slfn8	F KO	I38	28.0343	25.1054	2.92895	2.79853
D08	FAM	Slfn8			27.7468	25.0786	2.66812
D11	FAM	Slfn8	F KO	I41	25.0542	22.5558	2.49846	2.40855
D12	FAM	Slfn8			25.0563	22.7377	2.31865
G01	FAM	Slfn8	F WT	I37	26.8408	24.8492	1.99158	1.91862
G02	FAM	Slfn8			26.6586	24.8129	1.84566
G03	FAM	Slfn8	F KO	I42	25.8246	23.5674	2.25717	2.19546
G04	FAM	Slfn8			25.7003	23.5666	2.13375
H01	FAM	Slfn8	F KO	I43	24.8504	23.2026	1.64775	1.57099
H02	FAM	Slfn8			24.7628	23.2686	1.49423
H03	FAM	Slfn8	F WT	I44	25.6893	23.7086	1.98074	2.01074
H04	FAM	Slfn8			25.7399	23.6992	2.04074
B01	Cy5	Slfn9	M WT	I1	26.4376	23.8966	2.54099	2.56643			Male	Ave. dCt	2.01901
B02	Cy5	Slfn9			26.3673	23.7754	2.59187				Slfn9	dCt	ddCt	Fold Change	Ave. Fold	Std dev	Ttest
B03	Cy5	Slfn9	M KO	I2	25.3563	23.2558	2.1005	2.0711		M-WT	I1	2.56643	0.547421	0.684242	1.1267	0.599754
B04	Cy5	Slfn9			25.2945	23.2528	2.04169			M-WT	I3	3.11763	1.09862	0.466963
B05	Cy5	Slfn9	M WT	I3	27.543	24.4462	3.09678	3.11763		M-WT	I4	1.69818	-0.320823	1.24904
B06	Cy5	Slfn9			27.5668	24.4283	3.13847			M-WT	I6	2.21262	0.19361	0.874415
B07	Cy5	Slfn9	M WT	I4	25.7664	24.0434	1.72296	1.69818		M-WT	I9	2.19727	0.178258	0.88377
B08	Cy5	Slfn9			25.8331	24.1597	1.67341			M-WT	I10	2.96865	0.949643	0.517761
B09	Cy5	Slfn9	M KO	I5	27.429	24.3353	3.09369	3.15825		M-WT	I18	2.27373	0.254726	0.838146
B10	Cy5	Slfn9			27.6009	24.3781	3.2228			M-WT	I20	2.56159	0.542581	0.686541
B11	Cy5	Slfn9	M WT	I6	25.3456	23.0612	2.28439	2.21262		M-WT	I22	1.80735	-0.21166	1.15802
B12	Cy5	Slfn9			25.4965	23.3557	2.14084			M-WT	I24	1.84339	-0.175619	1.12945
E01	Cy5	Slfn9	M KO	I7	27.8303	25.5605	2.2698	2.16368		M-WT	I35	0.996233	-1.02277	2.03182
E02	Cy5	Slfn9			27.4447	25.3871	2.05756			M-WT	I36	1.28745	-0.731556	1.66043
E03	Cy5	Slfn9	M KO	I8	26.4604	23.6748	2.78556	2.78603		M-WT	I39	0.71658	-1.30243	2.46643
E04	Cy5	Slfn9			26.5462	23.7597	2.7865			M-KO	I2	2.0711	0.0520889	0.964539	0.854279	0.252647	0.215624
E05	Cy5	Slfn9	M WT	I9	26.4068	24.2557	2.15104	2.19727		M-KO	I5	3.15825	1.13924	0.453998
E06	Cy5	Slfn9			26.5057	24.2622	2.24349			M-KO	I7	2.16368	0.144672	0.904585
E07	Cy5	Slfn9	M WT	I10	27.6001	24.5588	3.0413	2.96865		M-KO	I8	2.78603	0.767025	0.587628
E08	Cy5	Slfn9			27.5095	24.6135	2.896			M-KO	I12	2.51162	0.492614	0.710736
E09	Cy5	Slfn9	M KO	I12	26.5424	24.0752	2.46716	2.51162		M-KO	I19	2.53459	0.515587	0.699508
E10	Cy5	Slfn9			26.5149	23.9589	2.55608			M-KO	I21	1.7856	-0.233403	1.1756
E11	Cy5	Slfn9	M WT	I18	27.645	25.3575	2.28752	2.27373		M-KO	I23	1.8844	-0.134604	1.09779
E12	Cy5	Slfn9			27.6895	25.4296	2.25995			M-KO	I25	1.88924	-0.12977	1.09412
G05	Cy5	Slfn9	M KO	I19	27.1704	24.6279	2.54256	2.53459
G06	Cy5	Slfn9			27.0939	24.5673	2.52662				Female	Ave. dCt	2.22789
G07	Cy5	Slfn9	M WT	I20	27.3418	24.7211	2.62067	2.56159			Slfn9	dCt	ddCt	Fold Change	Ave. Fold	Std dev	Ttest
G08	Cy5	Slfn9			27.25	24.7475	2.50251			F WT	I27	3.42084	1.19295	0.437408	1.0976	0.489675
H01	Cy5	Slfn9	F WT	I27	27.9549	24.5422	3.41272	3.42084		F WT	I40	3.00264	0.774752	0.584489
H02	Cy5	Slfn9			28.024	24.595	3.42896			F WT	I11	1.60679	-0.621098	1.53805
H03	Cy5	Slfn9	F WT	I40	27.6046	24.3977	3.20696	3.00264		F WT	I13	1.27535	-0.952544	1.93528
H04	Cy5	Slfn9			27.1678	24.3695	2.79832			F WT	I14	1.32206	-0.905834	1.87363
B01	Cy5	Slfn9	M KO	I21	25.795	24.1575	1.63745	1.7856		F WT	I26	2.43839	0.210499	0.864238
B02	Cy5	Slfn9			25.7465	23.8128	1.93376			F WT	I17	2.03441	-0.193482	1.14352
B03	Cy5	Slfn9	M WT	I22	26.0231	24.1514	1.87168	1.80735		F WT	I30	2.33117	0.103277	0.930916
B04	Cy5	Slfn9			25.9779	24.2349	1.74302			F WT	I31	1.7161	-0.511786	1.42581
B05	Cy5	Slfn9	M KO	I23	26.8095	25.0956	1.71385	1.8844		F WT	I32	2.60645	0.378563	0.769203
B06	Cy5	Slfn9			26.9095	24.8545	2.05496			F WT	I37	2.54488	0.316989	0.802743
B07	Cy5	Slfn9	M WT	I24	25.8514	23.9103	1.9411	1.84339		F WT	I44	2.4356	0.207714	0.865908
B08	Cy5	Slfn9			25.6969	23.9513	1.74568			F KO	I15	1.55515	-0.672739	1.5941
B09	Cy5	Slfn9	M KO	I25	25.9512	24.0652	1.88597	1.88924		F KO	I16	1.33296	-0.894932	1.85952	0.96679	0.447142	0.523964
B10	Cy5	Slfn9			25.7158	23.8232	1.89251			F KO	I28	1.97742	-0.250472	1.1896
B11	Cy5	Slfn9	M WT	I35	24.5709	23.539	1.03189	0.996233		F KO	I29	2.63906	0.411168	0.752014
B12	Cy5	Slfn9			24.6137	23.6531	0.960574			F KO	I33	2.49774	0.269852	0.829405
E01	Cy5	Slfn9	M WT	I36	25.3149	24.1162	1.1987	1.28745		F KO	I34	3.20524	0.977352	0.507911
E02	Cy5	Slfn9			25.2155	23.8393	1.3762			F KO	I38	3.09533	0.867438	0.548119
E03	Cy5	Slfn9	M WT	I39	23.2508	22.4805	0.770367	0.71658		F KO	I41	2.74077	0.512876	0.700824
E04	Cy5	Slfn9			23.302	22.6392	0.662794			F KO	I42	2.58007	0.352185	0.783397
E05	Cy5	Slfn9	F WT	I11	25.2335	23.6444	1.5891	1.60679		F KO	I43	2.37507	0.147184	0.903011
E06	Cy5	Slfn9			25.1384	23.514	1.62448
E07	Cy5	Slfn9	F WT	I13	25.0789	23.7525	1.32644	1.27535
E08	Cy5	Slfn9			25.0782	23.8539	1.22425
E09	Cy5	Slfn9	F WT	I14	24.6205	23.3829	1.23761	1.32206
E10	Cy5	Slfn9			24.7825	23.376	1.4065
E11	Cy5	Slfn9	F KO	I15	25.7335	24.2438	1.48966	1.55515
E12	Cy5	Slfn9			25.9892	24.3686	1.62064
G05	Cy5	Slfn9	F KO	I16	23.7319	22.436	1.29592	1.33296
G06	Cy5	Slfn9			23.6941	22.3241	1.36999
G07	Cy5	Slfn9	F WT	I26	25.9655	23.352	2.61348	2.43839
G08	Cy5	Slfn9			25.9108	23.6475	2.2633
B01	Cy5	Slfn9	F WT	I17	25.3832	23.3372	2.04601	2.03441
B02	Cy5	Slfn9			25.3382	23.3154	2.02281
B05	Cy5	Slfn9	F KO	I28	27.1219	25.244	1.8779	1.97742
B06	Cy5	Slfn9			27.2511	25.1741	2.07693
B07	Cy5	Slfn9	F KO	I29	27.5635	24.9451	2.61837	2.63906
B08	Cy5	Slfn9			27.6626	25.0028	2.65975
B09	Cy5	Slfn9	F WT	I30	26.4413	24.0406	2.40075	2.33117
B10	Cy5	Slfn9			26.4277	24.1661	2.26159
B11	Cy5	Slfn9	F WT	I31	24.7147	23.0203	1.69437	1.7161
B12	Cy5	Slfn9			24.7392	23.0014	1.73784
E01	Cy5	Slfn9	F WT	I32	26.1608	23.9829	2.17792	2.60645
E02	Cy5	Slfn9			26.7114	23.6764	3.03499
E03	Cy5	Slfn9	F KO	I33	25.4741	23.028	2.44612	2.49774
E04	Cy5	Slfn9			25.6	23.0506	2.54936
E05	Cy5	Slfn9	F KO	I34	25.978	22.7987	3.17937	3.20524
E06	Cy5	Slfn9			25.8443	22.6132	3.23111
E07	Cy5	Slfn9	F KO	I38	28.2744	25.1054	3.16901	3.09533
E08	Cy5	Slfn9			28.1003	25.0786	3.02164
E11	Cy5	Slfn9	F KO	I41	25.273	22.5558	2.71718	2.74077
E12	Cy5	Slfn9			25.502	22.7377	2.76435
G05	Cy5	Slfn9	F WT	I37	27.386	24.8492	2.53684	2.54488
G06	Cy5	Slfn9			27.3659	24.8129	2.55291
G07	Cy5	Slfn9	F KO	I42	26.0885	23.5674	2.52105	2.58007
G08	Cy5	Slfn9			26.2057	23.5666	2.6391
H05	Cy5	Slfn9	F KO	I43	25.5922	23.2026	2.38957	2.37507
H06	Cy5	Slfn9			25.6292	23.2686	2.36058
H07	Cy5	Slfn9	F WT	I44	26.1446	23.7086	2.43606	2.4356
H08	Cy5	Slfn9			26.1343	23.6992	2.43515
B01	HEX	RPLP0			23.8966
B02	HEX	RPLP0			23.7754
B03	HEX	RPLP0			23.2558
B04	HEX	RPLP0			23.2528
B05	HEX	RPLP0			24.4462
B06	HEX	RPLP0			24.4283
B07	HEX	RPLP0			24.0434
B08	HEX	RPLP0			24.1597
B09	HEX	RPLP0			24.3353
B10	HEX	RPLP0			24.3781
B11	HEX	RPLP0			23.0612
B12	HEX	RPLP0			23.3557
C01	HEX	RPLP0			23.6954
C02	HEX	RPLP0			23.4964
C03	HEX	RPLP0			22.9604
C04	HEX	RPLP0			23.0308
C05	HEX	RPLP0			24.2828
C06	HEX	RPLP0			24.096
C07	HEX	RPLP0			23.8155
C08	HEX	RPLP0			23.9856
C09	HEX	RPLP0			24.1117
C10	HEX	RPLP0			24.1704
C11	HEX	RPLP0			22.7508
C12	HEX	RPLP0			23.0601
E01	HEX	RPLP0			25.5605
E02	HEX	RPLP0			25.3871
E03	HEX	RPLP0			23.6748
E04	HEX	RPLP0			23.7597
E05	HEX	RPLP0			24.2557
E06	HEX	RPLP0			24.2622
E07	HEX	RPLP0			24.5588
E08	HEX	RPLP0			24.6135
E09	HEX	RPLP0			24.0752
E10	HEX	RPLP0			23.9589
E11	HEX	RPLP0			25.3575
E12	HEX	RPLP0			25.4296
F01	HEX	RPLP0			25.3722
F02	HEX	RPLP0			25.2299
F03	HEX	RPLP0			23.5787
F04	HEX	RPLP0			23.7282
F05	HEX	RPLP0			24.1476
F06	HEX	RPLP0			24.1416
F07	HEX	RPLP0			24.4227
F08	HEX	RPLP0			24.5103
F09	HEX	RPLP0			23.7316
F10	HEX	RPLP0			23.5945
F11	HEX	RPLP0			25.3128
F12	HEX	RPLP0			25.3403
G05	HEX	RPLP0			24.6279
G06	HEX	RPLP0			24.5673
G07	HEX	RPLP0			24.7211
G08	HEX	RPLP0			24.7475
G09	HEX	RPLP0			24.3637
G10	HEX	RPLP0			24.2202
G11	HEX	RPLP0			24.5873
G12	HEX	RPLP0			24.9476
