# Supplementary material for: Loss of Schlafen3 influences the expression levels of Schlafen family members in ileum, thymus, and spleen tissue
Source: PeerJ. 2020 Jan 28;8:e8461. doi: 10.7717/peerj.8461 (PMC6993753; doi:10.7717/peerj.8461)
Supplement: Supplemental Information 21 [file peerj-08-8461-s021.xlsx]

## Sheet: 20190116_SLFN FAM PANETH P9
File Name	20190116_SLFN FAM PANETH P9.pcrd
Created By User
Notes
ID
Run Started	01/16/2019 20:04:55 UTC
Run Ended	01/16/2019 21:17:37 UTC
Sample Vol	20
Lid Temp	105
Protocol File Name	Unknown.prcl
Plate Setup File Name	DefaultPlate.pltd
Base Serial Number	CT031118
Optical Head Serial Number	785BR9482
CFX Manager Version	3.1.1517.0823.
Well group	All Wells
Amplification step	3
Melt step
Well	Fluor	Target	Content	Sample	Cq	Starting Quantity (SQ)
C01	FAM	Ang4	M KO	9	20.5177	23.0731
C02	FAM	Ang4			20.2623	22.6285
C03	FAM	Ang4	M WT	S1	19.5543	23.1444
C04	FAM	Ang4			19.867	23.4371
C05	FAM	Ang4	M KO	S2	19.1924	22.4373
C06	FAM	Ang4			18.9121	22.1896
C07	FAM	Ang4	M WT	S4	19.3725	22.1782
C08	FAM	Ang4			19.2192	22.2152
C09	FAM	Ang4	M WT	S6	20.1078	23.295
C10	FAM	Ang4			19.9955	23.0219
C11	FAM	Ang4	M WT	S7	19.2173	22.2533
C12	FAM	Ang4			19.5852	22.7263
F01	FAM	Ang4	F KO	S9	20.8434	23.1168
F02	FAM	Ang4			20.7448	22.8541
F03	FAM	Ang4	F KO	S10	19.2779	22.5421
F04	FAM	Ang4			19.3403	22.5142
F05	FAM	Ang4	F WT	S11	18.3581	21.6977
F06	FAM	Ang4			18.4705	21.648
F07	FAM	Ang4	F WT	S12	20.9947	22.2956
F08	FAM	Ang4			20.9436	22.2878
F09	FAM	Ang4	F KO	9	21.2439	23.7728
F10	FAM	Ang4			20.9198	23.3878
F11	FAM	Ang4	M KO	30	20.9533	23.3156
F12	FAM	Ang4			21.0069	23.4211
G09	FAM	Ang4	M KO	35	20.2777	23.2539
G10	FAM	Ang4			20.4954	23.2231
G11	FAM	Ang4	M KO	54	22.0613	24.1606
G12	FAM	Ang4			22.1792	24.4396
H09	FAM	Ang4	F WT	65	22.3474	24.5535
H10	FAM	Ang4			22.3186	24.705
H11	FAM	Ang4	F KO	67	21.3217	25.5212
H12	FAM	Ang4			21.3898	25.858
C01	Cy5	Pla2g4c	M KO	9	26.609	23.0731
C02	Cy5	Pla2g4c			26.4737	22.6285
C03	Cy5	Pla2g4c	M WT	S1	22.8023	23.1444
C04	Cy5	Pla2g4c			23.0455	23.4371
C05	Cy5	Pla2g4c	M KO	S2	23.1976	22.4373
C06	Cy5	Pla2g4c			23.054	22.1896
C07	Cy5	Pla2g4c	M WT	S4	25.0091	22.1782
C08	Cy5	Pla2g4c			25.0768	22.2152
C09	Cy5	Pla2g4c	M WT	S6	24.0561	23.295
C10	Cy5	Pla2g4c			23.9586	23.0219
C11	Cy5	Pla2g4c	M WT	S7	23.0924	22.2533
C12	Cy5	Pla2g4c			23.3708	22.7263
F01	Cy5	Pla2g4c	F KO	S9	25.031	23.1168
F02	Cy5	Pla2g4c			25.0592	22.8541
F03	Cy5	Pla2g4c	F KO	S10	24.7406	22.5421
F04	Cy5	Pla2g4c			24.7243	22.5142
F05	Cy5	Pla2g4c	F WT	S11	22.3945	21.6977
F06	Cy5	Pla2g4c			22.4835	21.648
F07	Cy5	Pla2g4c	F WT	S12	24.3149	22.2956
F08	Cy5	Pla2g4c			24.2854	22.2878
F09	Cy5	Pla2g4c	F KO	9	26.3855	23.7728
F10	Cy5	Pla2g4c			26.1372	23.3878
F11	Cy5	Pla2g4c	M KO	30	27.5174	23.3156
F12	Cy5	Pla2g4c			27.419	23.4211
G09	Cy5	Pla2g4c	M KO	35	27.0923	23.2539
G10	Cy5	Pla2g4c			27.167	23.2231
G11	Cy5	Pla2g4c	M KO	54	25.6699	24.1606
G12	Cy5	Pla2g4c			25.9094	24.4396
H09	Cy5	Pla2g4c	F WT	65	25.2513	24.5535
H10	Cy5	Pla2g4c			25.2064	24.705
H11	Cy5	Pla2g4c	F KO	67	27.0585	25.5212
H12	Cy5	Pla2g4c			27.0645	25.858
B01	HEX	RPLP0			23.059
B02	HEX	RPLP0			23.0549
B03	HEX	RPLP0			23.7843
B04	HEX	RPLP0			23.6008
B05	HEX	RPLP0			22.7541
B06	HEX	RPLP0			22.6751
B07	HEX	RPLP0			22.6359
B08	HEX	RPLP0			22.5844
B09	HEX	RPLP0			23.3815
B10	HEX	RPLP0			23.1687
B11	HEX	RPLP0			22.7996
B12	HEX	RPLP0			22.8999
C01	HEX	RPLP0			23.0731
C02	HEX	RPLP0			22.6285
C03	HEX	RPLP0			23.1444
C04	HEX	RPLP0			23.4371
C05	HEX	RPLP0			22.4373
C06	HEX	RPLP0			22.1896
C07	HEX	RPLP0			22.1782
C08	HEX	RPLP0			22.2152
C09	HEX	RPLP0			23.295
C10	HEX	RPLP0			23.0219
C11	HEX	RPLP0			22.2533
C12	HEX	RPLP0			22.7263
E01	HEX	RPLP0			23.2752
E02	HEX	RPLP0			23.138
E03	HEX	RPLP0			22.5261
E04	HEX	RPLP0			22.7233
E05	HEX	RPLP0			22.0654
E06	HEX	RPLP0			22.1811
E07	HEX	RPLP0			22.5479
E08	HEX	RPLP0			22.458
E09	HEX	RPLP0			23.8148
E10	HEX	RPLP0			23.8974
E11	HEX	RPLP0			23.4938
E12	HEX	RPLP0			23.6356
F01	HEX	RPLP0			23.1168
F02	HEX	RPLP0			22.8541
F03	HEX	RPLP0			22.5421
F04	HEX	RPLP0			22.5142
F05	HEX	RPLP0			21.6977
F06	HEX	RPLP0			21.648
F07	HEX	RPLP0			22.2956
F08	HEX	RPLP0			22.2878
F09	HEX	RPLP0			23.7728
F10	HEX	RPLP0			23.3878
F11	HEX	RPLP0			23.3156
F12	HEX	RPLP0			23.4211
G05	HEX	RPLP0			23.3267
G06	HEX	RPLP0			23.3196
G07	HEX	RPLP0			24.0525
G08	HEX	RPLP0			23.9852
G09	HEX	RPLP0			23.2539
G10	HEX	RPLP0			23.2231
G11	HEX	RPLP0			24.1606
G12	HEX	RPLP0			24.4396
H05	HEX	RPLP0			24.9309
H06	HEX	RPLP0			24.7101
H07	HEX	RPLP0			25.787
H08	HEX	RPLP0			25.8153
H09	HEX	RPLP0			24.5535
H10	HEX	RPLP0			24.705
H11	HEX	RPLP0			25.5212
H12	HEX	RPLP0			25.858
B01	FAM	Slfn1	M KO	9	28.8847	23.059
B02	FAM	Slfn1			28.8028	23.0549
B03	FAM	Slfn1	M WT	S1	33.0386	23.7843
B04	FAM	Slfn1			33.1242	23.6008
B05	FAM	Slfn1	M KO	S2	32.5363	22.7541
B06	FAM	Slfn1			32.4788	22.6751
B07	FAM	Slfn1	M WT	S4	27.8328	22.6359
B08	FAM	Slfn1			27.9755	22.5844
B09	FAM	Slfn1	M WT	S6	32.7007	23.3815
B10	FAM	Slfn1			32.4678	23.1687
B11	FAM	Slfn1	M WT	S7	28.2484	22.7996
B12	FAM	Slfn1			28.2404	22.8999
E01	FAM	Slfn1	F KO	S9	28.6369	23.2752
E02	FAM	Slfn1			28.3521	23.138
E03	FAM	Slfn1	F KO	S10	28.41	22.5261
E04	FAM	Slfn1			28.5194	22.7233
E05	FAM	Slfn1	F WT	S11	28.1043	22.0654
E06	FAM	Slfn1			28.1754	22.1811
E07	FAM	Slfn1	F WT	S12	28.5922	22.5479
E08	FAM	Slfn1			28.4793	22.458
E09	FAM	Slfn1	F KO	9	29.3061	23.8148
E10	FAM	Slfn1			29.4815	23.8974
E11	FAM	Slfn1	M KO	30	28.1965	23.4938
E12	FAM	Slfn1			28.3109	23.6356
G05	FAM	Slfn1	M KO	35	29.3234	23.3267
G06	FAM	Slfn1			29.3873	23.3196
G07	FAM	Slfn1	M KO	54	29.1834	24.0525
G08	FAM	Slfn1			29.0872	23.9852
H05	FAM	Slfn1	F WT	65	29.2103	24.9309
H06	FAM	Slfn1			28.8545	24.7101
H07	FAM	Slfn1	F KO	67	30.0699	25.787
H08	FAM	Slfn1			30.0916	25.8153
A01	HEX	Slfn2	M KO	9	24.334	23.059
A02	HEX	Slfn2			24.7169	23.0549
A03	HEX	Slfn2	M WT	S1	26.588	23.7843
A04	HEX	Slfn2			26.4998	23.6008
A05	HEX	Slfn2	M KO	S2	25.9789	22.7541
A06	HEX	Slfn2			26.0684	22.6751
A07	HEX	Slfn2	M WT	S4	22.5383	22.6359
A08	HEX	Slfn2			22.4505	22.5844
A09	HEX	Slfn2	M WT	S6	26.2499	23.3815
A10	HEX	Slfn2			26.1841	23.1687
A11	HEX	Slfn2	M WT	S7	22.8397	22.7996
A12	HEX	Slfn2			22.917	22.8999
D01	HEX	Slfn2	F KO	S9	23.1078	23.2752
D02	HEX	Slfn2			23.2557	23.138
D03	HEX	Slfn2	F KO	S10	22.4553	22.5261
D04	HEX	Slfn2			22.2255	22.7233
D05	HEX	Slfn2	F WT	S11	22.8507	22.0654
D06	HEX	Slfn2			23.0401	22.1811
D07	HEX	Slfn2	F WT	S12	21.3772	22.5479
D08	HEX	Slfn2			21.2387	22.458
D09	HEX	Slfn2	F KO	9	22.6019	23.8148
D10	HEX	Slfn2			22.4578	23.8974
D11	HEX	Slfn2	M KO	30	22.9957	23.4938
D12	HEX	Slfn2			22.812	23.6356
G01	HEX	Slfn2	M KO	35	24.4517	23.3267
G02	HEX	Slfn2			24.1857	23.3196
G03	HEX	Slfn2	M KO	54	24.0314	24.0525
G04	HEX	Slfn2			24.0257	23.9852
H01	HEX	Slfn2	F WT	65	23.4565	24.9309
H02	HEX	Slfn2			23.6009	24.7101
H03	HEX	Slfn2	F KO	67	23.9303	25.787
H04	HEX	Slfn2			23.6953	25.8153
A01	Cy5	Slfn5	M KO	9	26.4357	23.059
A02	Cy5	Slfn5			27.0442	23.0549
A03	Cy5	Slfn5	M WT	S1	29.4479	23.7843
A04	Cy5	Slfn5			29.3074	23.6008
A05	Cy5	Slfn5	M KO	S2	28.3098	22.7541
A06	Cy5	Slfn5			28.8478	22.6751
A07	Cy5	Slfn5	M WT	S4	27.5008	22.6359
A08	Cy5	Slfn5			27.3542	22.5844
A09	Cy5	Slfn5	M WT	S6	28.9942	23.3815
A10	Cy5	Slfn5			29.0112	23.1687
A11	Cy5	Slfn5	M WT	S7	27.6537	22.7996
A12	Cy5	Slfn5			28.0825	22.8999
D01	Cy5	Slfn5	F KO	S9	27.3895	23.2752
D02	Cy5	Slfn5			27.5607	23.138
D03	Cy5	Slfn5	F KO	S10	26.0207	22.5261
D04	Cy5	Slfn5			25.7287	22.7233
D05	Cy5	Slfn5	F WT	S11	27.5634	22.0654
D06	Cy5	Slfn5			27.8593	22.1811
D07	Cy5	Slfn5	F WT	S12	25.8115	22.5479
D08	Cy5	Slfn5			25.7852	22.458
D09	Cy5	Slfn5	F KO	9	25.9271	23.8148
D10	Cy5	Slfn5			25.9208	23.8974
D11	Cy5	Slfn5	M KO	30	27.2354	23.4938
D12	Cy5	Slfn5			27.1314	23.6356
G01	Cy5	Slfn5	M KO	35	28.1763	23.3267
G02	Cy5	Slfn5			28.0153	23.3196
G03	Cy5	Slfn5	M KO	54	27.9214	24.0525
G04	Cy5	Slfn5			27.6487	23.9852
H01	Cy5	Slfn5	F WT	65	27.1435	24.9309
H02	Cy5	Slfn5			27.2539	24.7101
H03	Cy5	Slfn5	F KO	67	25.6555	25.787
H04	Cy5	Slfn5			25.7298	25.8153
A01	FAM	Slfn8	M KO	9	25.3232	23.059
A02	FAM	Slfn8			25.7377	23.0549
A03	FAM	Slfn8	M WT	S1	25.9054	23.7843
A04	FAM	Slfn8			25.7634	23.6008
A05	FAM	Slfn8	M KO	S2	26.3065	22.7541
A06	FAM	Slfn8			26.6783	22.6751
A07	FAM	Slfn8	M WT	S4	24.517	22.6359
A08	FAM	Slfn8			24.3821	22.5844
A09	FAM	Slfn8	M WT	S6	25.2206	23.3815
A10	FAM	Slfn8			25.1749	23.1687
A11	FAM	Slfn8	M WT	S7	24.5879	22.7996
A12	FAM	Slfn8			24.5789	22.8999
D01	FAM	Slfn8	F KO	S9	24.8604	23.2752
D02	FAM	Slfn8			25.0391	23.138
D03	FAM	Slfn8	F KO	S10	24.0753	22.5261
D04	FAM	Slfn8			23.8649	22.7233
D05	FAM	Slfn8	F WT	S11	23.9294	22.0654
D06	FAM	Slfn8			24.1377	22.1811
D07	FAM	Slfn8	F WT	S12	24.4936	22.5479
D08	FAM	Slfn8			24.3538	22.458
D09	FAM	Slfn8	F KO	9	26.1188	23.8148
D10	FAM	Slfn8			26.1593	23.8974
D11	FAM	Slfn8	M KO	30	25.2738	23.4938
D12	FAM	Slfn8			25.229	23.6356
G01	FAM	Slfn8	M KO	35	26.438	23.3267
G02	FAM	Slfn8			26.2128	23.3196
G03	FAM	Slfn8	M KO	54	26.8677	24.0525
G04	FAM	Slfn8			26.7495	23.9852
H01	FAM	Slfn8	F WT	65	26.2812	24.9309
H02	FAM	Slfn8			26.3238	24.7101
H03	FAM	Slfn8	F KO	67	27.2006	25.787
H04	FAM	Slfn8			27.0888	25.8153
B01	Cy5	Slfn9	M KO	9	25.1718	23.059
B02	Cy5	Slfn9			25.2193	23.0549
B03	Cy5	Slfn9	M WT	S1	25.3562	23.7843
B04	Cy5	Slfn9			25.4276	23.6008
B05	Cy5	Slfn9	M KO	S2	26.1659	22.7541
B06	Cy5	Slfn9			26.1294	22.6751
B07	Cy5	Slfn9	M WT	S4	24.2608	22.6359
B08	Cy5	Slfn9			24.2675	22.5844
B09	Cy5	Slfn9	M WT	S6	24.9405	23.3815
B10	Cy5	Slfn9			24.7397	23.1687
B11	Cy5	Slfn9	M WT	S7	24.3253	22.7996
B12	Cy5	Slfn9			24.2941	22.8999
E01	Cy5	Slfn9	F KO	S9	25.5355	23.2752
E02	Cy5	Slfn9			25.45	23.138
E03	Cy5	Slfn9	F KO	S10	24.2156	22.5261
E04	Cy5	Slfn9			24.3223	22.7233
E05	Cy5	Slfn9	F WT	S11	24.0945	22.0654
E06	Cy5	Slfn9			24.1112	22.1811
E07	Cy5	Slfn9	F WT	S12	24.3965	22.5479
E08	Cy5	Slfn9			24.183	22.458
E09	Cy5	Slfn9	F KO	9	26.1732	23.8148
E10	Cy5	Slfn9			26.3974	23.8974
E11	Cy5	Slfn9	M KO	30	25.8806	23.4938
E12	Cy5	Slfn9			26.0252	23.6356
G05	Cy5	Slfn9	M KO	35	26.0405	23.3267
G06	Cy5	Slfn9			26.0123	23.3196
G07	Cy5	Slfn9	M KO	54	26.3987	24.0525
G08	Cy5	Slfn9			26.5263	23.9852
H05	Cy5	Slfn9	F WT	65	26.6058	24.9309
H06	Cy5	Slfn9			26.3313	24.7101
H07	Cy5	Slfn9	F KO	67	27.4276	25.787
H08	Cy5	Slfn9			27.3695	25.8153
