# Supplementary material for: Loss of Schlafen3 influences the expression levels of Schlafen family members in ileum, thymus, and spleen tissue
Source: PeerJ. 2020 Jan 28;8:e8461. doi: 10.7717/peerj.8461 (PMC6993753; doi:10.7717/peerj.8461)
Supplement: Supplemental Information 22 [file peerj-08-8461-s022.xlsx]

## Sheet: 20190116_SLFN FAM PANETH P10
File Name	20190116_SLFN FAM PANETH P10.pcrd
Created By User
Notes
ID
Run Started	01/16/2019 21:32:32 UTC
Run Ended	01/16/2019 22:45:14 UTC
Sample Vol	20
Lid Temp	105
Protocol File Name	Unknown.prcl
Plate Setup File Name	DefaultPlate.pltd
Base Serial Number	CT031118
Optical Head Serial Number	785BR9482
CFX Manager Version	3.1.1517.0823.
Well group	All Wells
Amplification step	3
Melt step
Well	Fluor	Target	Content	Sample	Cq	Starting Quantity (SQ)
C01	FAM	Ang4	F KO	68	21.0773	24.2695
C02	FAM	Ang4			20.9157	24.1044
C03	FAM	Ang4	F WT	69	21.1263	23.9787
C04	FAM	Ang4			21.1625	24.0957
C05	FAM	Ang4	F WT	70	19.6519	23.0406
C06	FAM	Ang4			19.537	22.7923
C07	FAM	Ang4	F KO	76	20.944	24.0038
C08	FAM	Ang4			21.0103	23.8264
C09	FAM	Ang4	F KO	78	21.7987	26.8662
C10	FAM	Ang4			21.6448	26.5737
C11	FAM	Ang4	F KO	92	19.3975	23.0401
C12	FAM	Ang4			19.5378	22.9093
F01	FAM	Ang4	M KO	11	21.0727	24.0762
F02	FAM	Ang4			20.9831	24.039
F03	FAM	Ang4	M WT	12	20.0868	23.3158
F04	FAM	Ang4			20.0359	23.2372
F05	FAM	Ang4	M WT	37	20.5736	24.1998
F06	FAM	Ang4			20.6025	24.0246
F07	FAM	Ang4	M WT	46	19.8387	22.8671
F08	FAM	Ang4			19.7279	22.6196
F09	FAM	Ang4	M WT	63	19.4843	22.4368
F10	FAM	Ang4			19.359	22.231
F11	FAM	Ang4	F KO	49	19.6392	22.4803
F12	FAM	Ang4			19.6124	22.7344
G09	FAM	Ang4	M WT	51	17.81	22.129
G10	FAM	Ang4			17.9938	22.1003
G11	FAM	Ang4	M KO	53	21.7895	24.836
G12	FAM	Ang4			22.0087	25.0647
H09	FAM	Ang4	M WT	55	20.3513	23.7172
H10	FAM	Ang4			20.4214	23.6226
H11	FAM	Ang4	F KO	58	17.4197	23.1637
H12	FAM	Ang4			17.3938	23.3528
C01	Cy5	Pla2g4c	F KO	68	25.4592	24.2695
C02	Cy5	Pla2g4c			25.5051	24.1044
C03	Cy5	Pla2g4c	F WT	69	25.3621	23.9787
C04	Cy5	Pla2g4c			25.4321	24.0957
C05	Cy5	Pla2g4c	F WT	70	25.0557	23.0406
C06	Cy5	Pla2g4c			24.9786	22.7923
C07	Cy5	Pla2g4c	F KO	76	25.4558	24.0038
C08	Cy5	Pla2g4c			25.4744	23.8264
C09	Cy5	Pla2g4c	F KO	78	27.6888	26.8662
C10	Cy5	Pla2g4c			27.5687	26.5737
C11	Cy5	Pla2g4c	F KO	92	24.8885	23.0401
C12	Cy5	Pla2g4c			24.8129	22.9093
F01	Cy5	Pla2g4c	M KO	11	26.9309	24.0762
F02	Cy5	Pla2g4c			26.8841	24.039
F03	Cy5	Pla2g4c	M WT	12	25.5887	23.3158
F04	Cy5	Pla2g4c			25.4738	23.2372
F05	Cy5	Pla2g4c	M WT	37	26.3378	24.1998
F06	Cy5	Pla2g4c			26.3739	24.0246
F07	Cy5	Pla2g4c	M WT	46	24.3104	22.8671
F08	Cy5	Pla2g4c			24.2434	22.6196
F09	Cy5	Pla2g4c	M WT	63	25.7264	22.4368
F10	Cy5	Pla2g4c			25.5923	22.231
F11	Cy5	Pla2g4c	F KO	49	26.3969	22.4803
F12	Cy5	Pla2g4c			26.3365	22.7344
G09	Cy5	Pla2g4c	M WT	51	25.3087	22.129
G10	Cy5	Pla2g4c			25.5506	22.1003
G11	Cy5	Pla2g4c	M KO	53	28.154	24.836
G12	Cy5	Pla2g4c			28.324	25.0647
H09	Cy5	Pla2g4c	M WT	55	26.1634	23.7172
H10	Cy5	Pla2g4c			26.1644	23.6226
H11	Cy5	Pla2g4c	F KO	58	22.0456	23.1637
H12	Cy5	Pla2g4c			21.9353	23.3528
B01	HEX	RPLP0			24.3987
B02	HEX	RPLP0			24.3702
B03	HEX	RPLP0			24.6996
B04	HEX	RPLP0			24.4071
B05	HEX	RPLP0			23.1187
B06	HEX	RPLP0			23.2129
B07	HEX	RPLP0			24.1307
B08	HEX	RPLP0			24.3262
B09	HEX	RPLP0			27.04
B10	HEX	RPLP0			26.9326
B11	HEX	RPLP0			23.0788
B12	HEX	RPLP0			23.0937
C01	HEX	RPLP0			24.2695
C02	HEX	RPLP0			24.1044
C03	HEX	RPLP0			23.9787
C04	HEX	RPLP0			24.0957
C05	HEX	RPLP0			23.0406
C06	HEX	RPLP0			22.7923
C07	HEX	RPLP0			24.0038
C08	HEX	RPLP0			23.8264
C09	HEX	RPLP0			26.8662
C10	HEX	RPLP0			26.5737
C11	HEX	RPLP0			23.0401
C12	HEX	RPLP0			22.9093
E01	HEX	RPLP0			24.4943
E02	HEX	RPLP0			24.1054
E03	HEX	RPLP0			23.5749
E04	HEX	RPLP0			23.5759
E05	HEX	RPLP0			24.2578
E06	HEX	RPLP0			24.2852
E07	HEX	RPLP0			23.2028
E08	HEX	RPLP0			23.1748
E09	HEX	RPLP0			22.4841
E10	HEX	RPLP0			22.5719
E11	HEX	RPLP0			22.5849
E12	HEX	RPLP0			22.7744
F01	HEX	RPLP0			24.0762
F02	HEX	RPLP0			24.039
F03	HEX	RPLP0			23.3158
F04	HEX	RPLP0			23.2372
F05	HEX	RPLP0			24.1998
F06	HEX	RPLP0			24.0246
F07	HEX	RPLP0			22.8671
F08	HEX	RPLP0			22.6196
F09	HEX	RPLP0			22.4368
F10	HEX	RPLP0			22.231
F11	HEX	RPLP0			22.4803
F12	HEX	RPLP0			22.7344
G05	HEX	RPLP0			22.2025
G06	HEX	RPLP0			22.1899
G07	HEX	RPLP0			24.8545
G08	HEX	RPLP0			24.6252
G09	HEX	RPLP0			22.129
G10	HEX	RPLP0			22.1003
G11	HEX	RPLP0			24.836
G12	HEX	RPLP0			25.0647
H05	HEX	RPLP0			23.9916
H06	HEX	RPLP0			23.8655
H07	HEX	RPLP0			23.2465
H08	HEX	RPLP0			23.5135
H09	HEX	RPLP0			23.7172
H10	HEX	RPLP0			23.6226
H11	HEX	RPLP0			23.1637
H12	HEX	RPLP0			23.3528
B01	FAM	Slfn1	F KO	68	29.119	24.3987
B02	FAM	Slfn1			29.1578	24.3702
B03	FAM	Slfn1	F WT	69	29.1975	24.6996
B04	FAM	Slfn1			28.877	24.4071
B05	FAM	Slfn1	F WT	70	29.3878	23.1187
B06	FAM	Slfn1			29.599	23.2129
B07	FAM	Slfn1	F KO	76	29.282	24.1307
B08	FAM	Slfn1			29.3648	24.3262
B09	FAM	Slfn1	F KO	78	31.4288	27.04
B10	FAM	Slfn1			31.4436	26.9326
B11	FAM	Slfn1	F KO	92	29.1263	23.0788
B12	FAM	Slfn1			29.3411	23.0937
E01	FAM	Slfn1	M KO	11	29.6264	24.4943
E02	FAM	Slfn1			29.2361	24.1054
E03	FAM	Slfn1	M WT	12	28.1614	23.5749
E04	FAM	Slfn1			28.1513	23.5759
E05	FAM	Slfn1	M WT	37	30.4713	24.2578
E06	FAM	Slfn1			30.514	24.2852
E07	FAM	Slfn1	M WT	46	29.761	23.2028
E08	FAM	Slfn1			29.7528	23.1748
E09	FAM	Slfn1	M WT	63	29.0355	22.4841
E10	FAM	Slfn1			29.2198	22.5719
E11	FAM	Slfn1	F KO	49	29.2682	22.5849
E12	FAM	Slfn1			29.363	22.7744
G05	FAM	Slfn1	M WT	51	28.5334	22.2025
G06	FAM	Slfn1			28.58	22.1899
G07	FAM	Slfn1	M KO	53	30.0023	24.8545
G08	FAM	Slfn1			29.8546	24.6252
H05	FAM	Slfn1	M WT	55	29.3018	23.9916
H06	FAM	Slfn1			29.1842	23.8655
H07	FAM	Slfn1	F KO	58	30.3381	23.2465
H08	FAM	Slfn1			30.4515	23.5135
A01	HEX	Slfn2	F KO	68	22.8585	24.3987
A02	HEX	Slfn2			22.8369	24.3702
A03	HEX	Slfn2	F WT	69	23.261	24.6996
A04	HEX	Slfn2			23.2634	24.4071
A05	HEX	Slfn2	F WT	70	23.3363	23.1187
A06	HEX	Slfn2			23.2481	23.2129
A07	HEX	Slfn2	F KO	76	23.4261	24.1307
A08	HEX	Slfn2			23.4498	24.3262
A09	HEX	Slfn2	F KO	78	26.2038	27.04
A10	HEX	Slfn2			26.1365	26.9326
A11	HEX	Slfn2	F KO	92	23.0332	23.0788
A12	HEX	Slfn2			23.035	23.0937
D01	HEX	Slfn2	M KO	11	24.1743	24.4943
D02	HEX	Slfn2			24.0352	24.1054
D03	HEX	Slfn2	M WT	12	22.3921	23.5749
D04	HEX	Slfn2			22.3688	23.5759
D05	HEX	Slfn2	M WT	37	25.6886	24.2578
D06	HEX	Slfn2			25.4635	24.2852
D07	HEX	Slfn2	M WT	46	24.3702	23.2028
D08	HEX	Slfn2			24.3529	23.1748
D09	HEX	Slfn2	M WT	63	24.175	22.4841
D10	HEX	Slfn2			24.1258	22.5719
D11	HEX	Slfn2	F KO	49	23.0385	22.5849
D12	HEX	Slfn2			23.0232	22.7744
G01	HEX	Slfn2	M WT	51	22.8897	22.2025
G02	HEX	Slfn2			22.9587	22.1899
G03	HEX	Slfn2	M KO	53	24.3644	24.8545
G04	HEX	Slfn2			24.2975	24.6252
H01	HEX	Slfn2	M WT	55	23.3104	23.9916
H02	HEX	Slfn2			23.3477	23.8655
H03	HEX	Slfn2	F KO	58	24.1018	23.2465
H04	HEX	Slfn2			24.2234	23.5135
A01	Cy5	Slfn5	F KO	68	26.7622	24.3987
A02	Cy5	Slfn5			26.8346	24.3702
A03	Cy5	Slfn5	F WT	69	27.1549	24.6996
A04	Cy5	Slfn5			27.1989	24.4071
A05	Cy5	Slfn5	F WT	70	26.6829	23.1187
A06	Cy5	Slfn5			26.6352	23.2129
A07	Cy5	Slfn5	F KO	76	25.0608	24.1307
A08	Cy5	Slfn5			25.148	24.3262
A09	Cy5	Slfn5	F KO	78	28.4044	27.04
A10	Cy5	Slfn5			28.4948	26.9326
A11	Cy5	Slfn5	F KO	92	26.3884	23.0788
A12	Cy5	Slfn5			26.264	23.0937
D01	Cy5	Slfn5	M KO	11	28.0739	24.4943
D02	Cy5	Slfn5			27.8281	24.1054
D03	Cy5	Slfn5	M WT	12	26.6387	23.5749
D04	Cy5	Slfn5			26.7295	23.5759
D05	Cy5	Slfn5	M WT	37	28.7814	24.2578
D06	Cy5	Slfn5			28.6665	24.2852
D07	Cy5	Slfn5	M WT	46	27.5891	23.2028
D08	Cy5	Slfn5			27.4707	23.1748
D09	Cy5	Slfn5	M WT	63	26.319	22.4841
D10	Cy5	Slfn5			26.3261	22.5719
D11	Cy5	Slfn5	F KO	49	25.6893	22.5849
D12	Cy5	Slfn5			25.7263	22.7744
G01	Cy5	Slfn5	M WT	51	26.3797	22.2025
G02	Cy5	Slfn5			26.3947	22.1899
G03	Cy5	Slfn5	M KO	53	28.4469	24.8545
G04	Cy5	Slfn5			28.3846	24.6252
H01	Cy5	Slfn5	M WT	55	27.31	23.9916
H02	Cy5	Slfn5			27.2402	23.8655
H03	Cy5	Slfn5	F KO	58	26.4586	23.2465
H04	Cy5	Slfn5			26.5062	23.5135
A01	FAM	Slfn8	F KO	68	26.1491	24.3987
A02	FAM	Slfn8			26.209	24.3702
A03	FAM	Slfn8	F WT	69	25.8825	24.6996
A04	FAM	Slfn8			25.9874	24.4071
A05	FAM	Slfn8	F WT	70	24.3814	23.1187
A06	FAM	Slfn8			24.2915	23.2129
A07	FAM	Slfn8	F KO	76	25.8254	24.1307
A08	FAM	Slfn8			25.9133	24.3262
A09	FAM	Slfn8	F KO	78	28.4418	27.04
A10	FAM	Slfn8			28.4406	26.9326
A11	FAM	Slfn8	F KO	92	24.0561	23.0788
A12	FAM	Slfn8			24.0644	23.0937
D01	FAM	Slfn8	M KO	11	25.5848	24.4943
D02	FAM	Slfn8			25.4425	24.1054
D03	FAM	Slfn8	M WT	12	24.9489	23.5749
D04	FAM	Slfn8			24.9096	23.5759
D05	FAM	Slfn8	M WT	37	26.919	24.2578
D06	FAM	Slfn8			26.7111	24.2852
D07	FAM	Slfn8	M WT	46	25.1615	23.2028
D08	FAM	Slfn8			25.122	23.1748
D09	FAM	Slfn8	M WT	63	24.0972	22.4841
D10	FAM	Slfn8			24.1368	22.5719
D11	FAM	Slfn8	F KO	49	24.97	22.5849
D12	FAM	Slfn8			25.0471	22.7744
G01	FAM	Slfn8	M WT	51	23.9315	22.2025
G02	FAM	Slfn8			24.0187	22.1899
G03	FAM	Slfn8	M KO	53	27.0737	24.8545
G04	FAM	Slfn8			26.9344	24.6252
H01	FAM	Slfn8	M WT	55	25.4149	23.9916
H02	FAM	Slfn8			25.2249	23.8655
H03	FAM	Slfn8	F KO	58	25.6347	23.2465
H04	FAM	Slfn8			25.7107	23.5135
B01	Cy5	Slfn9	F KO	68	25.5543	24.3987
B02	Cy5	Slfn9			25.4764	24.3702
B03	Cy5	Slfn9	F WT	69	25.6616	24.6996
B04	Cy5	Slfn9			25.3705	24.4071
B05	Cy5	Slfn9	F WT	70	23.2559	23.1187
B06	Cy5	Slfn9			23.4534	23.2129
B07	Cy5	Slfn9	F KO	76	25.2236	24.1307
B08	Cy5	Slfn9			25.2802	24.3262
B09	Cy5	Slfn9	F KO	78	28.3493	27.04
B10	Cy5	Slfn9			28.4384	26.9326
B11	Cy5	Slfn9	F KO	92	23.1742	23.0788
B12	Cy5	Slfn9			23.404	23.0937
E01	Cy5	Slfn9	M KO	11	26.0211	24.4943
E02	Cy5	Slfn9			25.791	24.1054
E03	Cy5	Slfn9	M WT	12	24.9345	23.5749
E04	Cy5	Slfn9			24.9972	23.5759
E05	Cy5	Slfn9	M WT	37	26.5247	24.2578
E06	Cy5	Slfn9			26.5433	24.2852
E07	Cy5	Slfn9	M WT	46	24.8857	23.2028
E08	Cy5	Slfn9			24.8402	23.1748
E09	Cy5	Slfn9	M WT	63	23.6787	22.4841
E10	Cy5	Slfn9			23.9383	22.5719
E11	Cy5	Slfn9	F KO	49	24.5407	22.5849
E12	Cy5	Slfn9			24.5879	22.7744
G05	Cy5	Slfn9	M WT	51	23.0769	22.2025
G06	Cy5	Slfn9			23.1325	22.1899
G07	Cy5	Slfn9	M KO	53	27.2311	24.8545
G08	Cy5	Slfn9			27.0193	24.6252
H05	Cy5	Slfn9	M WT	55	25.2292	23.9916
H06	Cy5	Slfn9			25.1396	23.8655
H07	Cy5	Slfn9	F KO	58	25.0892	23.2465
H08	Cy5	Slfn9			25.1259	23.5135
