# Supplementary material for: Loss of Schlafen3 influences the expression levels of Schlafen family members in ileum, thymus, and spleen tissue
Source: PeerJ. 2020 Jan 28;8:e8461. doi: 10.7717/peerj.8461 (PMC6993753; doi:10.7717/peerj.8461)
Supplement: Supplemental Information 24 [file peerj-08-8461-s024.xlsx]

## Sheet: 20190124_SLFN PANETH P11
File Name	20190124_SLFN PANETH P11.pcrd
Created By User
Notes
ID
Run Started	01/24/2019 20:27:19 UTC
Run Ended	01/24/2019 21:40:23 UTC
Sample Vol	20
Lid Temp	105
Protocol File Name	Unknown.prcl
Plate Setup File Name	DefaultPlate.pltd
Base Serial Number	CT031118
Optical Head Serial Number	785BR9482
CFX Manager Version	3.1.1517.0823.
Well group	All Wells
Amplification step	3
Melt step
Well	Fluor	Target	Content	Sample	Cq	Starting Quantity (SQ)	dCt	Ave. dCt			Male	Ave. dCt	-3.09615
C01	FAM	Ang4	F WT	66	20.2098	23.1242	-2.91442	-2.89624			Ang4	dCt	ddCt	Fold Change	Ave. Fold	Std dev	Ttest		Ang4 & Pla2g4c was combined with P8 compiled data!
C02	FAM	Ang4			20.0211	22.8991	-2.87806			M WT	13	-3.75751	-0.661354	1.58157
C03	FAM	Ang4	F KO	1	23.0655	24.0469	-0.9814	-1.02727		M WT	14	-1.82303	1.27312	0.413764
C04	FAM	Ang4			22.6117	23.6848	-1.07315			M WT	16	-3.06564	0.030513	0.979072
C05	FAM	Ang4	F KO	2	20.851	23.1057	-2.25472	-2.23655		M WT	17	-3.73843	-0.642279	1.56079
C06	FAM	Ang4			19.8583	22.0767	-2.21839			M KO	11	-0.82825	2.2679	0.207632
C07	FAM	Ang4	F KO	3	20.2136	22.6528	-2.43915	-2.4555		M KO	12	0.0279961	3.12415	0.114693
C08	FAM	Ang4			20.126	22.5978	-2.47186
C09	FAM	Ang4	F WT	4	19.8888	23.3829	-3.49411	-3.49257			Female	Ave. dCt	-3.05496
C10	FAM	Ang4			19.209	22.7	-3.49102				Ang4	dCt	ddCt	Fold Change	Ave. Fold	Std dev	Ttest
C11	FAM	Ang4	F WT	5	19.7812	24.0319	-4.25063	-4.25709		F WT	66	-2.89624	0.158719	0.89582
C12	FAM	Ang4			19.7744	24.0379	-4.26356			F WT	4	-3.49257	-0.437609	1.35436
F01	FAM	Ang4	F WT	6	23.4842	26.177	-2.69277	-2.72192		F WT	5	-4.25709	-1.20214	2.3008
F02	FAM	Ang4			22.6765	25.4276	-2.75106			F WT	6	-2.72192	0.333043	0.793861
F03	FAM	Ang4	F WT	7	23.1027	23.8222	-0.719462	-0.847444		F WT	7	-0.847444	2.20752	0.216507
F04	FAM	Ang4			22.4228	23.3983	-0.975426			F WT	8	-1.78701	1.26795	0.415249
F05	FAM	Ang4	F WT	8	20.8955	22.6956	-1.80012	-1.78701		F WT	9	-2.36274	0.692215	0.618903
F06	FAM	Ang4			20.9414	22.7153	-1.77389			F WT	15	-6.07466	-3.0197	8.10999
F07	FAM	Ang4	F WT	9	20.671	23.0606	-2.38955	-2.36274		F KO	1	-1.02727	2.02769	0.245248
F08	FAM	Ang4			20.5493	22.8852	-2.33594			F KO	2	-2.23655	0.818405	0.567069
F09	FAM	Ang4	F KO	10	22.3434	25.8154	-3.47205	-3.4529		F KO	3	-2.4555	0.599455	0.660003
F10	FAM	Ang4			21.7101	25.1438	-3.43374			F KO	10	-3.4529	-0.397937	1.31762
F11	FAM	Ang4	M KO	11	21.488	22.3108	-0.822728	-0.82825
F12	FAM	Ang4			21.6179	22.4516	-0.833772
G09	FAM	Ang4	M KO	12	24.3675	24.2441	0.123416	0.0279961
G10	FAM	Ang4			24.125	24.1925	-0.0674236
G11	FAM	Ang4	M WT	13	18.8697	22.5869	-3.71714	-3.75751
G12	FAM	Ang4			18.729	22.5269	-3.79787
H09	FAM	Ang4	M WT	14	21.0293	22.8617	-1.8324	-1.82303
H10	FAM	Ang4			20.5016	22.3153	-1.81366
H11	FAM	Ang4	F WT	15	18.3657	24.4704	-6.10475	-6.07466
H12	FAM	Ang4			18.3619	24.4065	-6.04457
C01	FAM	Ang4	M WT	16	18.9637	22.1623	-3.19859	-3.06564
C02	FAM	Ang4			18.747	21.6797	-2.93268
C03	FAM	Ang4	M WT	17	17.165	20.9317	-3.76668	-3.73843
C04	FAM	Ang4			17.3609	21.071	-3.71018
C01	Cy5	Pla2g4c	F WT	66	25.2893	23.1242	2.16505	2.24404			Male	Ave. dCt	1.11145
C02	Cy5	Pla2g4c			25.2222	22.8991	2.32304				Pla2g4c	dCt	ddCt	Fold Change	Ave. Fold	Std dev	Ttest
C03	Cy5	Pla2g4c	F KO	1	26.0278	24.0469	1.98088	1.92804		M WT	13	2.20925	5.3054	0.025288
C04	Cy5	Pla2g4c			25.56	23.6848	1.8752			M WT	14	2.99726	6.09341	0.0146454
C05	Cy5	Pla2g4c	F KO	2	24.6707	23.1057	1.56504	1.53999		M WT	16	1.0789	4.17505	0.0553586
C06	Cy5	Pla2g4c			23.5916	22.0767	1.51494			M WT	17	-1.8396	1.25655	0.418545
C07	Cy5	Pla2g4c	F KO	3	23.8631	22.6528	1.2103	1.17184		M KO	11	1.83858	4.93473	0.0326963
C08	Cy5	Pla2g4c			23.7312	22.5978	1.13338			M KO	12	2.84746	5.94361	0.0162478
C09	Cy5	Pla2g4c	F WT	4	21.5196	23.3829	-1.86328	-1.85618
C10	Cy5	Pla2g4c			20.8509	22.7	-1.84909				Female	Ave. dCt	0.110538
C11	Cy5	Pla2g4c	F WT	5	20.8215	24.0319	-3.21035	-3.07663			Pla2g4c	dCt	ddCt	Fold Change	Ave. Fold	Std dev	Ttest
C12	Cy5	Pla2g4c			21.095	24.0379	-2.94292			F WT	66	2.24404	2.13351	0.227903
F01	Cy5	Pla2g4c	F WT	6	27.9868	26.177	1.80988	1.61384		F WT	4	-1.85618	-1.96672	3.90879
F02	Cy5	Pla2g4c			26.8454	25.4276	1.4178			F WT	5	-3.07663	-3.18717	9.10824
F03	Cy5	Pla2g4c	F WT	7	26.6981	23.8222	2.87596	2.70823		F WT	6	1.61384	1.5033	0.352745
F04	Cy5	Pla2g4c			25.9388	23.3983	2.5405			F WT	7	2.70823	2.59769	0.165203
F05	Cy5	Pla2g4c	F WT	8	24.3592	22.6956	1.66357	1.69572		F WT	8	1.69572	1.58519	0.333282
F06	Cy5	Pla2g4c			24.4431	22.7153	1.72787			F WT	9	2.0957	1.98517	0.252584
F07	Cy5	Pla2g4c	F WT	9	25.1052	23.0606	2.04457	2.0957		F WT	15	-4.54042	-4.65096	25.1233
F08	Cy5	Pla2g4c			25.0321	22.8852	2.14683			F KO	1	1.92804	1.8175	0.283712
F09	Cy5	Pla2g4c	F KO	10	24.1673	25.8154	-1.64809	-1.66057		F KO	2	1.53999	1.42945	0.371272
F10	Cy5	Pla2g4c			23.4708	25.1438	-1.67304			F KO	3	1.17184	1.0613	0.4792
F11	Cy5	Pla2g4c	M KO	11	23.9637	22.3108	1.65293	1.83858		F KO	10	-1.66057	-1.7711	3.41315
F12	Cy5	Pla2g4c			24.4759	22.4516	2.02422
G09	Cy5	Pla2g4c	M KO	12	27.1976	24.2441	2.95345	2.84746
G10	Cy5	Pla2g4c			26.9339	24.1925	2.74148
G11	Cy5	Pla2g4c	M WT	13	24.606	22.5869	2.01912	2.20925
G12	Cy5	Pla2g4c			24.9263	22.5269	2.39939
H09	Cy5	Pla2g4c	M WT	14	26.1999	22.8617	3.33828	2.99726
H10	Cy5	Pla2g4c			24.9715	22.3153	2.65624
H11	Cy5	Pla2g4c	F WT	15	19.5413	24.4704	-4.92914	-4.54042
H12	Cy5	Pla2g4c			20.2548	24.4065	-4.1517
C01	Cy5	Pla2g4c	M WT	16	23.0923	22.1623	0.930062	1.0789
C02	Cy5	Pla2g4c			22.9074	21.6797	1.22773
C03	Cy5	Pla2g4c	M WT	17	19.1037	20.9317	-1.82792	-1.8396
C04	Cy5	Pla2g4c			19.2197	21.071	-1.85129
B01	FAM	Slfn1	F WT	66	28.5751	23.1479	5.42718	5.42987			Male	Ave. dCt	5.45431
B02	FAM	Slfn1			28.5744	23.1418	5.43256				Slfn1	dCt	ddCt	Fold Change	Ave. Fold	Std dev	Ttest
B03	FAM	Slfn1	F KO	1	29.4218	23.2822	6.1396	6.25031		M WT	13	5.65203	0.197718	0.871929
B04	FAM	Slfn1			30.8442	24.4832	6.36101			M WT	14	6.52826	1.07395	0.475018
B05	FAM	Slfn1	F KO	2	28.9558	22.5665	6.38934	6.40665		M WT	16	4.05024	-1.40408	2.64648
B06	FAM	Slfn1			30.0857	23.6617	6.42396			M WT	17	5.58672	0.13241	0.912306
B07	FAM	Slfn1	F KO	3	29.4604	23.2884	6.17204	6.06091		M KO	11	6.35332	0.899002	0.536258
B08	FAM	Slfn1			29.0226	23.0728	5.94978			M KO	12	5.69726	0.242944	0.845019
B09	FAM	Slfn1	F WT	4	26.6221	22.5534	4.0687	4.11222
B10	FAM	Slfn1			27.2787	23.123	4.15574				Female	Ave. dCt	5.65409
B11	FAM	Slfn1	F WT	5	28.6398	23.546	5.09382	5.03848			Slfn1	dCt	ddCt	Fold Change	Ave. Fold	Std dev	Ttest
B12	FAM	Slfn1			28.8747	23.8915	4.98313			F WT	66	5.42987	-0.22422	1.16815
E01	FAM	Slfn1	F WT	6	34.0692	26.9286	7.14054	7.27304		F WT	4	4.11222	-1.54187	2.91171
E02	FAM	Slfn1			33.053	25.6475	7.40553			F WT	5	5.03848	-0.615613	1.53221
E03	FAM	Slfn1	F WT	7	30.2802	23.6367	6.64344	6.74045		F WT	6	7.27304	1.61895	0.325573
E04	FAM	Slfn1			30.2041	23.3667	6.83747			F WT	7	6.74045	1.08636	0.470947
E05	FAM	Slfn1	F WT	8	28.4304	23.0649	5.36543	5.38359		F WT	8	5.38359	-0.270503	1.20623
E06	FAM	Slfn1			28.3186	22.9168	5.40174			F WT	9	4.93992	-0.71417	1.64054
E07	FAM	Slfn1	F WT	9	28.3092	23.3374	4.97181	4.93992		F WT	15	6.31515	0.661061	0.632413
E08	FAM	Slfn1			28.96	24.0519	4.90802			F KO	1	6.25031	0.596217	0.661486
E09	FAM	Slfn1	F KO	10	29.9935	24.7475	5.24601	5.21935		F KO	2	6.40665	0.752562	0.593548
E10	FAM	Slfn1			30.2172	25.0245	5.19269			F KO	3	6.06091	0.406818	0.754285
E11	FAM	Slfn1	M KO	11	29.0356	22.6174	6.41819	6.35332		F KO	10	5.21935	-0.434741	1.35167
E12	FAM	Slfn1			29.0414	22.7529	6.28844
G05	FAM	Slfn1	M KO	12	29.5974	24.0606	5.53683	5.69726
G06	FAM	Slfn1			29.9794	24.1217	5.85769
G07	FAM	Slfn1	M WT	13	28.0677	22.2954	5.77225	5.65203
G08	FAM	Slfn1			28.3262	22.7944	5.53181
H05	FAM	Slfn1	M WT	14	29.4616	22.9766	6.485	6.52826
H06	FAM	Slfn1			28.637	22.0655	6.57152
H07	FAM	Slfn1	F WT	15	30.5208	24.2672	6.25358	6.31515
H08	FAM	Slfn1			30.8895	24.5128	6.37672
B01	FAM	Slfn1	M WT	16	25.6097	21.8583	3.75148	4.05024
B02	FAM	Slfn1			26.1069	21.7579	4.349
B03	FAM	Slfn1	M WT	17	26.569	21.0079	5.56102	5.58672
B04	FAM	Slfn1			26.7865	21.174	5.61243
A01	HEX	Slfn2	F WT	66	23.0662	23.1479	-0.0816608	-0.0632399			Male	Ave. dCt	1.13789
A02	HEX	Slfn2			23.097	23.1418	-0.044819				Slfn2	dCt	ddCt	Fold Change	Ave. Fold	Std dev	Ttest
A03	HEX	Slfn2	F KO	1	24.2139	23.2822	0.931746	0.476133		M WT	13	0.254526	-0.883366	1.84467
A04	HEX	Slfn2			24.5037	24.4832	0.0205194			M WT	14	1.98318	0.845284	0.556601
A05	HEX	Slfn2	F KO	2	23.6835	22.5665	1.11705	1.02201		M WT	16	0.625888	-0.512004	1.42603
A06	HEX	Slfn2			24.5887	23.6617	0.926974			M WT	17	1.68798	0.550086	0.682979
A07	HEX	Slfn2	F KO	3	23.4043	23.2884	0.115914	0.635407		M KO	11	0.507375	-0.630517	1.54812
A08	HEX	Slfn2			24.2277	23.0728	1.1549			M KO	12	0.381333	-0.756559	1.68946
A09	HEX	Slfn2	F WT	4	21.6392	22.5534	-0.9142	-1.12484
A10	HEX	Slfn2			21.7875	23.123	-1.33547				Female	Ave. dCt	0.16789
A11	HEX	Slfn2	F WT	5	23.6155	23.546	0.0695418	-0.102643			Slfn2	dCt	ddCt	Fold Change	Ave. Fold	Std dev	Ttest
A12	HEX	Slfn2			23.6167	23.8915	-0.274829			F WT	66	-0.0632399	-0.23113	1.17375
D01	HEX	Slfn2	F WT	6	26.7058	26.9286	-0.222837	0.595366		F WT	4	-1.12484	-1.29273	2.44991
D02	HEX	Slfn2			27.0611	25.6475	1.41357			F WT	5	-0.102643	-0.270534	1.20625
D03	HEX	Slfn2	F WT	7	24.9433	23.6367	1.30659	2.04135		F WT	6	0.595366	0.427476	0.743561
D04	HEX	Slfn2			26.1428	23.3667	2.7761			F WT	7	2.04135	1.87346	0.272919
D05	HEX	Slfn2	F WT	8	23.5257	23.0649	0.460775	0.668216		F WT	8	0.668216	0.500326	0.706947
D06	HEX	Slfn2			23.7925	22.9168	0.875657			F WT	9	-0.599603	-0.767493	1.70231
D07	HEX	Slfn2	F WT	9	23.2977	23.3374	-0.0397138	-0.599603		F WT	15	-0.0714849	-0.239375	1.18048
D08	HEX	Slfn2			22.8924	24.0519	-1.15949			F KO	1	0.476133	0.308243	0.807625
D09	HEX	Slfn2	F KO	10	25.4785	24.7475	0.730989	0.861312		F KO	2	1.02201	0.85412	0.553203
D10	HEX	Slfn2			26.0162	25.0245	0.991635			F KO	3	0.635407	0.467517	0.723208
D11	HEX	Slfn2	M KO	11	23.1589	22.6174	0.54148	0.507375		F KO	10	0.861312	0.693422	0.618385
D12	HEX	Slfn2			23.2262	22.7529	0.473269
G01	HEX	Slfn2	M KO	12	24.6438	24.0606	0.583208	0.381333
G02	HEX	Slfn2			24.3012	24.1217	0.179458
G03	HEX	Slfn2	M WT	13	22.9474	22.2954	0.651966	0.254526
G04	HEX	Slfn2			22.6515	22.7944	-0.142915
H01	HEX	Slfn2	M WT	14	25.0579	22.9766	2.08123	1.98318
H02	HEX	Slfn2			23.9506	22.0655	1.88512
H03	HEX	Slfn2	F WT	15	24.3369	24.2672	0.0696736	-0.0714849
H04	HEX	Slfn2			24.3001	24.5128	-0.212643
A01	HEX	Slfn2	M WT	16	22.3865	21.8583	0.528247	0.625888
A02	HEX	Slfn2			22.4814	21.7579	0.723529
A03	HEX	Slfn2	M WT	17	22.9439	21.0079	1.93596	1.68798
A04	HEX	Slfn2			22.614	21.174	1.44
A01	Cy5	Slfn5	F WT	66	25.3426	23.1479	2.19468	2.24919			Male	Ave. dCt	4.14635
A02	Cy5	Slfn5			25.4455	23.1418	2.30369				Slfn5	dCt	ddCt	Fold Change	Ave. Fold	Std dev	Ttest
A03	Cy5	Slfn5	F KO	1	26.2379	23.2822	2.9557	2.48416		M WT	13	3.96214	-0.184208	1.13619
A04	Cy5	Slfn5			26.4958	24.4832	2.01262			M WT	14	4.03851	-0.107844	1.07762
A05	Cy5	Slfn5	F KO	2	27.051	22.5665	4.48448	4.28005		M WT	16	3.99362	-0.152732	1.11167
A06	Cy5	Slfn5			27.7373	23.6617	4.07562			M WT	17	4.59113	0.444784	0.734694
A07	Cy5	Slfn5	F KO	3	25.2118	23.2884	1.9234	2.5233		M KO	11	2.44142	-1.70493	3.26013
A08	Cy5	Slfn5			26.196	23.0728	3.1232			M KO	12	2.73441	-1.41194	2.66095
A09	Cy5	Slfn5	F WT	4	26.0452	22.5534	3.49189	3.20136
A10	Cy5	Slfn5			26.0338	23.123	2.91083				Female	Ave. dCt	3.15609
A11	Cy5	Slfn5	F WT	5	26.2828	23.546	2.73684	2.50314			Slfn5	dCt	ddCt	Fold Change	Ave. Fold	Std dev	Ttest
A12	Cy5	Slfn5			26.161	23.8915	2.26945			F WT	66	2.24919	-0.906907	1.87502
D01	Cy5	Slfn5	F WT	6	29.2105	26.9286	2.28188	3.33471		F WT	4	3.20136	0.0452686	0.969109
D02	Cy5	Slfn5			30.035	25.6475	4.38753			F WT	5	2.50314	-0.652951	1.57238
D03	Cy5	Slfn5	F WT	7	27.9619	23.6367	4.32516	5.00299		F WT	6	3.33471	0.178613	0.883552
D04	Cy5	Slfn5			29.0475	23.3667	5.68082			F WT	7	5.00299	1.8469	0.277989
D05	Cy5	Slfn5	F WT	8	26.8676	23.0649	3.80268	4.03935		F WT	8	4.03935	0.883262	0.54214
D06	Cy5	Slfn5			27.1929	22.9168	4.27602			F WT	9	2.21883	-0.937265	1.9149
D07	Cy5	Slfn5	F WT	9	26.0706	23.3374	2.73323	2.21883		F WT	15	2.69917	-0.456919	1.37261
D08	Cy5	Slfn5			25.7564	24.0519	1.70442			F KO	1	2.48416	-0.671936	1.59321
D09	Cy5	Slfn5	F KO	10	27.9008	24.7475	3.15334	3.17381		F KO	2	4.28005	1.12396	0.458833
D10	Cy5	Slfn5			28.2188	25.0245	3.19427			F KO	3	2.5233	-0.632795	1.55057
D11	Cy5	Slfn5	M KO	11	25.028	22.6174	2.41062	2.44142		F KO	10	3.17381	0.0177133	0.987797
D12	Cy5	Slfn5			25.2252	22.7529	2.47223
G01	Cy5	Slfn5	M KO	12	26.9615	24.0606	2.90086	2.73441
G02	Cy5	Slfn5			26.6897	24.1217	2.56796
G03	Cy5	Slfn5	M WT	13	26.6634	22.2954	4.36796	3.96214
G04	Cy5	Slfn5			26.3507	22.7944	3.55633
H01	Cy5	Slfn5	M WT	14	27.0497	22.9766	4.07308	4.03851
H02	Cy5	Slfn5			26.0694	22.0655	4.00393
H03	Cy5	Slfn5	F WT	15	27.1241	24.2672	2.85696	2.69917
H04	Cy5	Slfn5			27.0542	24.5128	2.54139
A01	Cy5	Slfn5	M WT	16	26.4625	21.8583	4.60426	3.99362
A02	Cy5	Slfn5			25.1409	21.7579	3.38298
A03	Cy5	Slfn5	M WT	17	25.7883	21.0079	4.78036	4.59113
A04	Cy5	Slfn5			25.576	21.174	4.40191
A01	FAM	Slfn8	F WT	66	25.0843	23.1479	1.93638	1.90943			Male	Ave. dCt	1.45598
A02	FAM	Slfn8			25.0243	23.1418	1.88249				Slfn8	dCt	ddCt	Fold Change	Ave. Fold	Std dev	Ttest
A03	FAM	Slfn8	F KO	1	25.3575	23.2822	2.07529	1.62056		M WT	13	1.39084	-0.0651371	1.04618
A04	FAM	Slfn8			25.649	24.4832	1.16584			M WT	14	1.96721	0.511235	0.701622
A05	FAM	Slfn8	F KO	2	24.3626	22.5665	1.79616	1.64155		M WT	16	0.926948	-0.52903	1.44296
A06	FAM	Slfn8			25.1487	23.6617	1.48693			M WT	17	1.53891	0.0829323	0.944137
A07	FAM	Slfn8	F KO	3	24.4326	23.2884	1.14422	1.68278		M KO	11	2.05381	0.59783	0.660747
A08	FAM	Slfn8			25.2942	23.0728	2.22134			M KO	12	2.04355	0.587576	0.66546
A09	FAM	Slfn8	F WT	4	24.0359	22.5534	1.48257	1.18151
A10	FAM	Slfn8			24.0034	23.123	0.880442				Female	Ave. dCt	1.54114
A11	FAM	Slfn8	F WT	5	25.4587	23.546	1.91266	1.71016			Slfn8	dCt	ddCt	Fold Change	Ave. Fold	Std dev	Ttest
A12	FAM	Slfn8			25.3992	23.8915	1.50765			F WT	66	1.90943	0.368295	0.774697
D01	FAM	Slfn8	F WT	6	28.1516	26.9286	1.22302	2.00345		F WT	4	1.18151	-0.359629	1.2831
D02	FAM	Slfn8			28.4314	25.6475	2.78389			F WT	5	1.71016	0.169022	0.889445
D03	FAM	Slfn8	F WT	7	25.229	23.6367	1.59227	2.31526		F WT	6	2.00345	0.462316	0.72582
D04	FAM	Slfn8			26.4049	23.3667	3.03824			F WT	7	2.31526	0.77412	0.584745
D05	FAM	Slfn8	F WT	8	24.5405	23.0649	1.47559	1.663		F WT	8	1.663	0.121862	0.919001
D06	FAM	Slfn8			24.7672	22.9168	1.8504			F WT	9	0.171866	-1.36927	2.5834
D07	FAM	Slfn8	F WT	9	24.1032	23.3374	0.765819	0.171866		F WT	15	1.37442	-0.166714	1.1225
D08	FAM	Slfn8			23.6299	24.0519	-0.422088			F KO	1	1.62056	0.0794274	0.946433
D09	FAM	Slfn8	F KO	10	27.4707	24.7475	2.72319	2.87874		F KO	2	1.64155	0.100411	0.932767
D10	FAM	Slfn8			28.0588	25.0245	3.03429			F KO	3	1.68278	0.14164	0.906488
D11	FAM	Slfn8	M KO	11	24.6797	22.6174	2.0623	2.05381		F KO	10	2.87874	1.3376	0.395677
D12	FAM	Slfn8			24.7983	22.7529	2.04531
G01	FAM	Slfn8	M KO	12	26.2824	24.0606	2.22178	2.04355
G02	FAM	Slfn8			25.987	24.1217	1.86533
G03	FAM	Slfn8	M WT	13	24.058	22.2954	1.76253	1.39084
G04	FAM	Slfn8			23.8135	22.7944	1.01915
H01	FAM	Slfn8	M WT	14	25.0654	22.9766	2.08874	1.96721
H02	FAM	Slfn8			23.9112	22.0655	1.84569
H03	FAM	Slfn8	F WT	15	25.7493	24.2672	1.48208	1.37442
H04	FAM	Slfn8			25.7795	24.5128	1.26677
A01	FAM	Slfn8	M WT	16	22.7531	21.8583	0.894822	0.926948
A02	FAM	Slfn8			22.717	21.7579	0.959074
A03	FAM	Slfn8	M WT	17	22.7757	21.0079	1.76775	1.53891
A04	FAM	Slfn8			22.4841	21.174	1.31007
B01	Cy5	Slfn9	F WT	66	24.69	23.1479	1.54212	1.55882			Male	Ave. dCt	2.23271
B02	Cy5	Slfn9			24.7173	23.1418	1.57552				Slfn9	dCt	ddCt	Fold Change	Ave. Fold	Std dev	Ttest
B03	Cy5	Slfn9	F KO	1	26.0417	23.2822	2.7595	2.81013		M WT	13	2.28835	0.0556402	0.962167
B04	Cy5	Slfn9			27.3439	24.4832	2.86075			M WT	14	2.96522	0.732516	0.601853
B05	Cy5	Slfn9	F KO	2	25.2112	22.5665	2.64473	2.68188		M WT	16	1.69634	-0.536365	1.45031
B06	Cy5	Slfn9			26.3808	23.6617	2.71902			M WT	17	1.98092	-0.251791	1.19068
B07	Cy5	Slfn9	F KO	3	25.7031	23.2884	2.41468	2.368		M KO	11	2.68927	0.456561	0.728721
B08	Cy5	Slfn9			25.3941	23.0728	2.32131			M KO	12	3.18141	0.948707	0.518097
B09	Cy5	Slfn9	F WT	4	24.8426	22.5534	2.2892	2.27783
B10	Cy5	Slfn9			25.3894	23.123	2.26646				Female	Ave. dCt	2.46345
B11	Cy5	Slfn9	F WT	5	26.2768	23.546	2.73083	2.67309			Slfn9	dCt	ddCt	Fold Change	Ave. Fold	Std dev	Ttest
B12	Cy5	Slfn9			26.5069	23.8915	2.61535			F WT	66	1.55882	-0.904627	1.87206
E01	Cy5	Slfn9	F WT	6	30.1684	26.9286	3.23977	3.2219		F WT	4	2.27783	-0.185615	1.1373
E02	Cy5	Slfn9			28.8515	25.6475	3.20402			F WT	5	2.67309	0.209644	0.864751
E03	Cy5	Slfn9	F WT	7	26.366	23.6367	2.72928	2.85196		F WT	6	3.2219	0.75845	0.591131
E04	Cy5	Slfn9			26.3413	23.3667	2.97465			F WT	7	2.85196	0.388519	0.763913
E05	Cy5	Slfn9	F WT	8	25.9703	23.0649	2.90537	2.91759		F WT	8	2.91759	0.454149	0.729941
E06	Cy5	Slfn9			25.8467	22.9168	2.92982			F WT	9	1.6387	-0.824747	1.77122
E07	Cy5	Slfn9	F WT	9	25.0123	23.3374	1.67492	1.6387		F WT	15	2.56767	0.104229	0.930302
E08	Cy5	Slfn9			25.6544	24.0519	1.60248			F KO	1	2.81013	0.346681	0.786391
E09	Cy5	Slfn9	F KO	10	28.1427	24.7475	3.3952	3.40758		F KO	2	2.68188	0.218432	0.859499
E10	Cy5	Slfn9			28.4445	25.0245	3.41997			F KO	3	2.368	-0.0954503	1.0684
E11	Cy5	Slfn9	M KO	11	25.2791	22.6174	2.66169	2.68927		F KO	10	3.40758	0.944135	0.519741
E12	Cy5	Slfn9			25.4698	22.7529	2.71685
G05	Cy5	Slfn9	M KO	12	27.1122	24.0606	3.05156	3.18141
G06	Cy5	Slfn9			27.433	24.1217	3.31127
G07	Cy5	Slfn9	M WT	13	24.6126	22.2954	2.31713	2.28835
G08	Cy5	Slfn9			25.0539	22.7944	2.25956
H05	Cy5	Slfn9	M WT	14	25.8066	22.9766	2.82999	2.96522
H06	Cy5	Slfn9			25.1659	22.0655	3.10046
H07	Cy5	Slfn9	F WT	15	26.6914	24.2672	2.42425	2.56767
H08	Cy5	Slfn9			27.2239	24.5128	2.7111
B01	Cy5	Slfn9	M WT	16	23.4079	21.8583	1.54967	1.69634
B02	Cy5	Slfn9			23.6009	21.7579	1.84302
B03	Cy5	Slfn9	M WT	17	23.0484	21.0079	2.04047	1.98092
B04	Cy5	Slfn9			23.0954	21.174	1.92136
B01	HEX	RPLP0			23.1479
B02	HEX	RPLP0			23.1418
B03	HEX	RPLP0			23.2822
B04	HEX	RPLP0			24.4832
B05	HEX	RPLP0			22.5665
B06	HEX	RPLP0			23.6617
B07	HEX	RPLP0			23.2884
B08	HEX	RPLP0			23.0728
B09	HEX	RPLP0			22.5534
B10	HEX	RPLP0			23.123
B11	HEX	RPLP0			23.546
B12	HEX	RPLP0			23.8915
C01	HEX	RPLP0			23.1242
C02	HEX	RPLP0			22.8991
C03	HEX	RPLP0			24.0469
C04	HEX	RPLP0			23.6848
C05	HEX	RPLP0			23.1057
C06	HEX	RPLP0			22.0767
C07	HEX	RPLP0			22.6528
C08	HEX	RPLP0			22.5978
C09	HEX	RPLP0			23.3829
C10	HEX	RPLP0			22.7
C11	HEX	RPLP0			24.0319
C12	HEX	RPLP0			24.0379
E01	HEX	RPLP0			26.9286
E02	HEX	RPLP0			25.6475
E03	HEX	RPLP0			23.6367
E04	HEX	RPLP0			23.3667
E05	HEX	RPLP0			23.0649
E06	HEX	RPLP0			22.9168
E07	HEX	RPLP0			23.3374
E08	HEX	RPLP0			24.0519
E09	HEX	RPLP0			24.7475
E10	HEX	RPLP0			25.0245
E11	HEX	RPLP0			22.6174
E12	HEX	RPLP0			22.7529
F01	HEX	RPLP0			26.177
F02	HEX	RPLP0			25.4276
F03	HEX	RPLP0			23.8222
F04	HEX	RPLP0			23.3983
F05	HEX	RPLP0			22.6956
F06	HEX	RPLP0			22.7153
F07	HEX	RPLP0			23.0606
F08	HEX	RPLP0			22.8852
F09	HEX	RPLP0			25.8154
F10	HEX	RPLP0			25.1438
F11	HEX	RPLP0			22.3108
F12	HEX	RPLP0			22.4516
G05	HEX	RPLP0			24.0606
G06	HEX	RPLP0			24.1217
G07	HEX	RPLP0			22.2954
G08	HEX	RPLP0			22.7944
G09	HEX	RPLP0			24.2441
G10	HEX	RPLP0			24.1925
G11	HEX	RPLP0			22.5869
G12	HEX	RPLP0			22.5269
H05	HEX	RPLP0			22.9766
H06	HEX	RPLP0			22.0655
H07	HEX	RPLP0			24.2672
H08	HEX	RPLP0			24.5128
H09	HEX	RPLP0			22.8617
H10	HEX	RPLP0			22.3153
H11	HEX	RPLP0			24.4704
H12	HEX	RPLP0			24.4065
