# Supplementary material for: Loss of Schlafen3 influences the expression levels of Schlafen family members in ileum, thymus, and spleen tissue
Source: PeerJ. 2020 Jan 28;8:e8461. doi: 10.7717/peerj.8461 (PMC6993753; doi:10.7717/peerj.8461)
Supplement: Supplemental Information 25 [file peerj-08-8461-s025.xlsx]

## Sheet: 20190104_FAMILY PANETH P2
File Name	20190104_FAMILY PANETH P2.pcrd
Created By User
Notes
ID
Run Started	01/04/2019 22:22:25 UTC
Run Ended	01/04/2019 23:34:55 UTC
Sample Vol	20
Lid Temp	105
Protocol File Name	Unknown.prcl
Plate Setup File Name	DefaultPlate.pltd
Base Serial Number	CT031118
Optical Head Serial Number	785BR9482
CFX Manager Version	3.1.1517.0823.
Well group	All Wells
Amplification step	3
Melt step
Well	Fluor	Target	Content	Sample	Cq	Starting Quantity (SQ)
C01	FAM	Ang4			21.2765	23.9793
C02	FAM	Ang4			21.0145	23.5198
C03	FAM	Ang4			21.3142	23.9877
C04	FAM	Ang4			21.2577	23.9403
C05	FAM	Ang4			21.835	24.726
C06	FAM	Ang4			21.8033	24.6404
C07	FAM	Ang4			21.5897	23.9319
C08	FAM	Ang4			21.4572	23.6691
C09	FAM	Ang4			21.2194	24.1692
C10	FAM	Ang4			21.0121	23.752
C11	FAM	Ang4			21.3186	23.6403
C12	FAM	Ang4			21.3087	23.4844
F01	FAM	Ang4			22.417	23.9933
F02	FAM	Ang4			22.363	23.9828
F03	FAM	Ang4			20.1608	22.3605
F04	FAM	Ang4			20.2957	22.2932
F05	FAM	Ang4			21.299	23.4475
F06	FAM	Ang4			21.2912	23.6093
F07	FAM	Ang4			19.4265	23.4398
F08	FAM	Ang4			19.4285	23.5353
F09	FAM	Ang4			19.7571	23.2007
F10	FAM	Ang4			19.6758	23.1852
F11	FAM	Ang4			21.0435	24.0013
F12	FAM	Ang4			21.0627	24.1749
G09	FAM	Ang4			19.6571	22.2313
G10	FAM	Ang4			19.6806	22.2241
G11	FAM	Ang4			21.6951	23.611
G12	FAM	Ang4			21.7515	23.8957
C01	Cy5	Pla2g4c			23.9019	23.9793
C02	Cy5	Pla2g4c			23.5874	23.5198
C03	Cy5	Pla2g4c			24.5956	23.9877
C04	Cy5	Pla2g4c			24.6284	23.9403
C05	Cy5	Pla2g4c			26.9704	24.726
C06	Cy5	Pla2g4c			27.0883	24.6404
C07	Cy5	Pla2g4c			24.8595	23.9319
C08	Cy5	Pla2g4c			24.6457	23.6691
C09	Cy5	Pla2g4c			25.4585	24.1692
C10	Cy5	Pla2g4c			25.0976	23.752
C11	Cy5	Pla2g4c			24.7475	23.6403
C12	Cy5	Pla2g4c			24.6732	23.4844
F01	Cy5	Pla2g4c			24.2046	23.9933
F02	Cy5	Pla2g4c			24.1851	23.9828
F03	Cy5	Pla2g4c			23.8327	22.3605
F04	Cy5	Pla2g4c			24.1137	22.2932
F05	Cy5	Pla2g4c			23.6945	23.4475
F06	Cy5	Pla2g4c			23.7927	23.6093
F07	Cy5	Pla2g4c			23.5231	23.4398
F08	Cy5	Pla2g4c			23.5345	23.5353
F09	Cy5	Pla2g4c			25.221	23.2007
F10	Cy5	Pla2g4c			25.233	23.1852
F11	Cy5	Pla2g4c			25.7588	24.0013
F12	Cy5	Pla2g4c			25.6408	24.1749
G09	Cy5	Pla2g4c			23.8371	22.2313
G10	Cy5	Pla2g4c			23.9619	22.2241
G11	Cy5	Pla2g4c			22.4923	23.611
G12	Cy5	Pla2g4c			22.8093	23.8957
B01	FAM	Slfn1			29.8928	24.1575
B02	FAM	Slfn1			29.5745	23.8128
B03	FAM	Slfn1			30.1621	24.1514
B04	FAM	Slfn1			30.2837	24.2349
B05	FAM	Slfn1			31.2582	25.0956
B06	FAM	Slfn1			31.2641	24.8545
B07	FAM	Slfn1			30.6638	23.9103
B08	FAM	Slfn1			30.6912	23.9513
B09	FAM	Slfn1			29.6328	24.0652
B10	FAM	Slfn1			29.5527	23.8232
B11	FAM	Slfn1			29.0002	23.539
B12	FAM	Slfn1			29.062	23.6531
E01	FAM	Slfn1			29.7546	24.1162
E02	FAM	Slfn1			29.5088	23.8393
E03	FAM	Slfn1			28.9659	22.4805
E04	FAM	Slfn1			28.9094	22.6392
E05	FAM	Slfn1			30.8753	23.6444
E06	FAM	Slfn1			30.7385	23.514
E07	FAM	Slfn1			29.282	23.7525
E08	FAM	Slfn1			29.2277	23.8539
E09	FAM	Slfn1			29.5792	23.3829
E10	FAM	Slfn1			29.6653	23.376
E11	FAM	Slfn1			29.7314	24.2438
E12	FAM	Slfn1			29.9306	24.3686
G05	FAM	Slfn1			28.1982	22.436
G06	FAM	Slfn1			28.2091	22.3241
G07	FAM	Slfn1			29.144	23.352
G08	FAM	Slfn1			29.2915	23.6475
A01	HEX	Slfn2			24.4861	24.1575
A02	HEX	Slfn2			24.6577	23.8128
A03	HEX	Slfn2			25.3891	24.1514
A04	HEX	Slfn2			25.4035	24.2349
A05	HEX	Slfn2			26.2829	25.0956
A06	HEX	Slfn2			26.2058	24.8545
A07	HEX	Slfn2			25.6756	23.9103
A08	HEX	Slfn2			25.6353	23.9513
A09	HEX	Slfn2			24.3699	24.0652
A10	HEX	Slfn2			24.2722	23.8232
A11	HEX	Slfn2			23.5279	23.539
A12	HEX	Slfn2			23.7205	23.6531
D01	HEX	Slfn2			24.3814	24.1162
D02	HEX	Slfn2			24.235	23.8393
D03	HEX	Slfn2			23.5518	22.4805
D04	HEX	Slfn2			23.4757	22.6392
D05	HEX	Slfn2			25.6052	23.6444
D06	HEX	Slfn2			25.5832	23.514
D07	HEX	Slfn2			24.3732	23.7525
D08	HEX	Slfn2			24.4505	23.8539
D09	HEX	Slfn2			23.6669	23.3829
D10	HEX	Slfn2			23.5946	23.376
D11	HEX	Slfn2			25.4604	24.2438
D12	HEX	Slfn2			25.5577	24.3686
G01	HEX	Slfn2			23.4261	22.436
G02	HEX	Slfn2			23.3243	22.3241
G03	HEX	Slfn2			24.4605	23.352
G04	HEX	Slfn2			24.3366	23.6475
A01	Cy5	Slfn5			27.3064	24.1575
A02	Cy5	Slfn5			27.4768	23.8128
A03	Cy5	Slfn5			28.6137	24.1514
A04	Cy5	Slfn5			28.5525	24.2349
A05	Cy5	Slfn5			28.911	25.0956
A06	Cy5	Slfn5			29.0176	24.8545
A07	Cy5	Slfn5			28.6529	23.9103
A08	Cy5	Slfn5			28.6481	23.9513
A09	Cy5	Slfn5			27.5591	24.0652
A10	Cy5	Slfn5			27.2434	23.8232
A11	Cy5	Slfn5			26.3228	23.539
A12	Cy5	Slfn5			26.4747	23.6531
D01	Cy5	Slfn5			27.1769	24.1162
D02	Cy5	Slfn5			27.2359	23.8393
D03	Cy5	Slfn5			27.2293	22.4805
D04	Cy5	Slfn5			27.2136	22.6392
D05	Cy5	Slfn5			27.7892	23.6444
D06	Cy5	Slfn5			27.7665	23.514
D07	Cy5	Slfn5			26.6652	23.7525
D08	Cy5	Slfn5			26.6263	23.8539
D09	Cy5	Slfn5			25.3376	23.3829
D10	Cy5	Slfn5			25.3882	23.376
D11	Cy5	Slfn5			28.2759	24.2438
D12	Cy5	Slfn5			28.1352	24.3686
G01	Cy5	Slfn5			25.7007	22.436
G02	Cy5	Slfn5			25.6385	22.3241
G03	Cy5	Slfn5			27.3727	23.352
G04	Cy5	Slfn5			27.2928	23.6475
A01	FAM	Slfn8			26.1282	24.1575
A02	FAM	Slfn8			26.3166	23.8128
A03	FAM	Slfn8			26.5024	24.1514
A04	FAM	Slfn8			26.4562	24.2349
A05	FAM	Slfn8			27.2692	25.0956
A06	FAM	Slfn8			27.2286	24.8545
A07	FAM	Slfn8			26.5263	23.9103
A08	FAM	Slfn8			26.4281	23.9513
A09	FAM	Slfn8			26.7694	24.0652
A10	FAM	Slfn8			26.5627	23.8232
A11	FAM	Slfn8			24.765	23.539
A12	FAM	Slfn8			24.923	23.6531
D01	FAM	Slfn8			25.6381	24.1162
D02	FAM	Slfn8			25.626	23.8393
D03	FAM	Slfn8			23.5055	22.4805
D04	FAM	Slfn8			23.4688	22.6392
D05	FAM	Slfn8			25.5878	23.6444
D06	FAM	Slfn8			25.6269	23.514
D07	FAM	Slfn8			25.3279	23.7525
D08	FAM	Slfn8			25.3755	23.8539
D09	FAM	Slfn8			25.2499	23.3829
D10	FAM	Slfn8			25.186	23.376
D11	FAM	Slfn8			26.2084	24.2438
D12	FAM	Slfn8			26.2573	24.3686
G01	FAM	Slfn8			24.2259	22.436
G02	FAM	Slfn8			24.1317	22.3241
G03	FAM	Slfn8			26.3578	23.352
G04	FAM	Slfn8			26.2713	23.6475
B01	Cy5	Slfn9			25.795	24.1575
B02	Cy5	Slfn9			25.7465	23.8128
B03	Cy5	Slfn9			26.0231	24.1514
B04	Cy5	Slfn9			25.9779	24.2349
B05	Cy5	Slfn9			26.8095	25.0956
B06	Cy5	Slfn9			26.9095	24.8545
B07	Cy5	Slfn9			25.8514	23.9103
B08	Cy5	Slfn9			25.6969	23.9513
B09	Cy5	Slfn9			25.9512	24.0652
B10	Cy5	Slfn9			25.7158	23.8232
B11	Cy5	Slfn9			24.5709	23.539
B12	Cy5	Slfn9			24.6137	23.6531
E01	Cy5	Slfn9			25.3149	24.1162
E02	Cy5	Slfn9			25.2155	23.8393
E03	Cy5	Slfn9			23.2508	22.4805
E04	Cy5	Slfn9			23.302	22.6392
E05	Cy5	Slfn9			25.2335	23.6444
E06	Cy5	Slfn9			25.1384	23.514
E07	Cy5	Slfn9			25.0789	23.7525
E08	Cy5	Slfn9			25.0782	23.8539
E09	Cy5	Slfn9			24.6205	23.3829
E10	Cy5	Slfn9			24.7825	23.376
E11	Cy5	Slfn9			25.7335	24.2438
E12	Cy5	Slfn9			25.9892	24.3686
G05	Cy5	Slfn9			23.7319	22.436
G06	Cy5	Slfn9			23.6941	22.3241
G07	Cy5	Slfn9			25.9655	23.352
G08	Cy5	Slfn9			25.9108	23.6475
B01	HEX	RPLP0			24.1575
B02	HEX	RPLP0			23.8128
B03	HEX	RPLP0			24.1514
B04	HEX	RPLP0			24.2349
B05	HEX	RPLP0			25.0956
B06	HEX	RPLP0			24.8545
B07	HEX	RPLP0			23.9103
B08	HEX	RPLP0			23.9513
B09	HEX	RPLP0			24.0652
B10	HEX	RPLP0			23.8232
B11	HEX	RPLP0			23.539
B12	HEX	RPLP0			23.6531
C01	HEX	RPLP0			23.9793
C02	HEX	RPLP0			23.5198
C03	HEX	RPLP0			23.9877
C04	HEX	RPLP0			23.9403
C05	HEX	RPLP0			24.726
C06	HEX	RPLP0			24.6404
C07	HEX	RPLP0			23.9319
C08	HEX	RPLP0			23.6691
C09	HEX	RPLP0			24.1692
C10	HEX	RPLP0			23.752
C11	HEX	RPLP0			23.6403
C12	HEX	RPLP0			23.4844
E01	HEX	RPLP0			24.1162
E02	HEX	RPLP0			23.8393
E03	HEX	RPLP0			22.4805
E04	HEX	RPLP0			22.6392
E05	HEX	RPLP0			23.6444
E06	HEX	RPLP0			23.514
E07	HEX	RPLP0			23.7525
E08	HEX	RPLP0			23.8539
E09	HEX	RPLP0			23.3829
E10	HEX	RPLP0			23.376
E11	HEX	RPLP0			24.2438
E12	HEX	RPLP0			24.3686
F01	HEX	RPLP0			23.9933
F02	HEX	RPLP0			23.9828
F03	HEX	RPLP0			22.3605
F04	HEX	RPLP0			22.2932
F05	HEX	RPLP0			23.4475
F06	HEX	RPLP0			23.6093
F07	HEX	RPLP0			23.4398
F08	HEX	RPLP0			23.5353
F09	HEX	RPLP0			23.2007
F10	HEX	RPLP0			23.1852
F11	HEX	RPLP0			24.0013
F12	HEX	RPLP0			24.1749
G05	HEX	RPLP0			22.436
G06	HEX	RPLP0			22.3241
G07	HEX	RPLP0			23.352
G08	HEX	RPLP0			23.6475
G09	HEX	RPLP0			22.2313
G10	HEX	RPLP0			22.2241
G11	HEX	RPLP0			23.611
G12	HEX	RPLP0			23.8957
