# Supplementary material for: Loss of Schlafen3 influences the expression levels of Schlafen family members in ileum, thymus, and spleen tissue
Source: PeerJ. 2020 Jan 28;8:e8461. doi: 10.7717/peerj.8461 (PMC6993753; doi:10.7717/peerj.8461)
Supplement: Supplemental Information 30 [file peerj-08-8461-s030.xlsx]

## Sheet: 20190116_SLFN FAM PANETH P8
File Name	20190116_SLFN FAM PANETH P8.pcrd
Created By User
Notes
ID
Run Started	01/16/2019 18:21:52 UTC
Run Ended	01/16/2019 19:33:38 UTC
Sample Vol	20
Lid Temp	105
Protocol File Name	Unknown.prcl
Plate Setup File Name	DefaultPlate.pltd
Base Serial Number	CT031118
Optical Head Serial Number	785BR9482
CFX Manager Version	3.1.1517.0823.
Well group	All Wells
Amplification step	3
Melt step
Well	Fluor	Target	Content	Sample	Cq	Starting Quantity (SQ)	dCt	Ave. dCt			Male	Ave. dCt	-2.82539
C01	FAM	Ang4	M WT	44	21.6966	24.1473	-2.45067	-2.44949			Ang4	dCt	ddCt	Fold Change	Ave. Fold	Std dev	Ttest
C02	FAM	Ang4			21.7704	24.2188	-2.44832			M WT	44	-2.44949	0.375896	0.770627	1.19216	0.581419
C03	FAM	Ang4	M WT	65	21.6734	25.1191	-3.44576	-3.44178		M WT	65	-3.44178	-0.616386	1.53303
C04	FAM	Ang4			21.8812	25.319	-3.4378			M WT	73	-1.09005	1.73534	0.300339
C05	FAM	Ang4	M KO	67	22.2419	24.3627	-2.12073	-2.13599		M WT	78	-0.368393	2.457	0.182125
C06	FAM	Ang4			22.1911	24.3424	-2.15125			M WT	81	-0.408613	2.41678	0.187274
C07	FAM	Ang4	M WT	73	24.9335	26.0167	-1.08321	-1.09005		M WT	85	-2.03525	0.790146	0.578286
C08	FAM	Ang4			25.0223	26.1192	-1.09689			M WT	87	-2.79341	0.0319825	0.978075
C09	FAM	Ang4	M KO	74	23.7148	25.1395	-1.42473	-1.30726		M WT	90	-3.58651	-0.761115	1.6948
C10	FAM	Ang4			23.4877	24.6774	-1.18978			M WT	96	-3.4211	-0.595714	1.51122
C11	FAM	Ang4	M WT	78	29.8538	30.1775	-0.323739	-0.368393		M WT	98	-3.04599	-0.220598	1.16522
C12	FAM	Ang4			30.2957	30.7088	-0.413046			M WT	S1	-3.58015	-0.754756	1.68735
F01	FAM	Ang4	M WT	81	24.3614	24.7154	-0.353981	-0.408613		M WT	S4	-2.90086	-0.0754643	1.0537
F02	FAM	Ang4			24.3223	24.7855	-0.463246			M WT	S6	-3.10677	-0.281378	1.21535
F03	FAM	Ang4	M WT	85	23.056	25.0394	-1.98339	-2.03525		M WT	S7	-3.08856	-0.263165	1.20011
F04	FAM	Ang4			23.1087	25.1958	-2.0871			M WT	12	-3.21516	-0.38977	1.31018
F05	FAM	Ang4	M KO	87	22.3834	24.6559	-2.27251	-2.25027		M WT	37	-3.52413	-0.698735	1.62308
F06	FAM	Ang4			22.431	24.659	-2.22803			M WT	46	-2.9601	-0.134708	1.09787
F07	FAM	Ang4	M KO	88	23.4638	27.6337	-4.16981	-4.14933		M WT	63	-2.91223	-0.0868405	1.06204
F08	FAM	Ang4			23.5854	27.7142	-4.12885			M WT	51	-4.21272	-1.38733	2.61594
F09	FAM	Ang4	M KO	86	19.2936	23.0178	-3.72419	-3.7564		M WT	55	-3.28353	-0.458137	1.37377
F10	FAM	Ang4			19.2556	23.0442	-3.78861			M WT	13	-3.75751	-0.932115	1.90807
F11	FAM	Ang4	M WT	87	19.7252	22.4888	-2.76355	-2.79341		M WT	14	-1.82303	1.00236	0.499183
F12	FAM	Ang4			19.9208	22.7441	-2.82327			M WT	16	-3.06564	-0.240247	1.1812
G09	FAM	Ang4	M WT	90	18.6917	22.3271	-3.6354	-3.58651		M WT	17	-3.73843	-0.91304	1.88301
G10	FAM	Ang4			18.9722	22.5098	-3.53762			M KO	67	-2.13599	0.689403	0.62011	1.53951	2.06816	0.234604
G11	FAM	Ang4	M WT	96	22.9127	26.3211	-3.40846	-3.4211		M KO	74	-1.30726	1.51813	0.349137
G12	FAM	Ang4			23.1175	26.5513	-3.43375			M KO	87	-2.25027	0.575121	0.67123
H09	FAM	Ang4	M WT	98	20.841	23.8953	-3.0542	-3.04599		M KO	88	-4.14933	-1.32394	2.50349
H10	FAM	Ang4			20.7859	23.8237	-3.03778			M KO	86	-3.7564	-0.931008	1.90661
H11	FAM	Ang4	M KO	5	20.8374	25.0428	-4.20538	-4.32568		M KO	5	-4.32568	-1.50029	2.82899
H12	FAM	Ang4			20.8829	25.3289	-4.44597			M KO	9	-2.46075	0.364637	0.776664
C01	FAM	Ang4	M KO	9	20.5177	23.0731	-2.55532	-2.46075		M KO	S2	-3.26119	-0.435798	1.35266
C02	FAM	Ang4			20.2623	22.6285	-2.36619			M KO	30	-2.38821	0.437178	0.738578
C03	FAM	Ang4	M WT	S1	19.5543	23.1444	-3.59017	-3.58015		M KO	35	-2.85192	-0.0265291	1.01856
C04	FAM	Ang4			19.867	23.4371	-3.57012			M KO	54	-2.17988	0.645512	0.639266
C05	FAM	Ang4	M KO	S2	19.1924	22.4373	-3.24488	-3.26119		M KO	11	-3.02972	-0.204326	1.15215
C06	FAM	Ang4			18.9121	22.1896	-3.2775			M KO	53	-5.85155	-3.02616	8.14639
C07	FAM	Ang4	M WT	S4	19.3725	22.1782	-2.80577	-2.90086		M KO	11	-0.82825	1.99714	0.250496
C08	FAM	Ang4			19.2192	22.2152	-2.99594			M KO	12	0.0279961	2.85339	0.138371
C09	FAM	Ang4	M WT	S6	20.1078	23.295	-3.18715	-3.10677
C10	FAM	Ang4			19.9955	23.0219	-3.02639				Female	Ave. dCt	-2.88706
C11	FAM	Ang4	M WT	S7	19.2173	22.2533	-3.03599	-3.08856			Ang4	dCt	ddCt	Fold Change	Ave. Fold	Std dev	Ttest
C12	FAM	Ang4			19.5852	22.7263	-3.14112			F WT	S11	-3.25854	-0.371482	1.29368	1.62862	0.429182
F01	FAM	Ang4	F KO	S9	20.8434	23.1168	-2.27343	-2.19137		F WT	S12	-1.32253	1.56453	0.338087
F02	FAM	Ang4			20.7448	22.8541	-2.10931			F WT	65	-2.2963	0.590764	0.663991
F03	FAM	Ang4	F KO	S10	19.2779	22.5421	-3.26422	-3.21907		F WT	69	-2.89279	-0.0057304	1.00398
F04	FAM	Ang4			19.3403	22.5142	-3.17392			F WT	70	-3.32196	-0.4349	1.35182
F05	FAM	Ang4	F WT	S11	18.3581	21.6977	-3.33956	-3.25854		F WT	66	-2.89624	-0.00917951	1.00638
F06	FAM	Ang4			18.4705	21.648	-3.17753			F WT	4	-3.49257	-0.605507	1.52151
F07	FAM	Ang4	F WT	S12	20.9947	22.2956	-1.30088	-1.32253		F WT	5	-4.25709	-1.37003	2.58477
F08	FAM	Ang4			20.9436	22.2878	-1.34418			F WT	6	-2.72192	0.165144	0.891839
F09	FAM	Ang4	F KO	9	21.2439	23.7728	-2.52889	-2.49848		F WT	7	-0.847444	2.03962	0.243228
F10	FAM	Ang4			20.9198	23.3878	-2.46806			F WT	8	-1.78701	1.10006	0.466499
F11	FAM	Ang4	M KO	30	20.9533	23.3156	-2.36227	-2.38821		F WT	9	-2.36274	0.524317	0.695288
F12	FAM	Ang4			21.0069	23.4211	-2.41416			F WT	15	-6.07466	-3.1876	9.11093
G09	FAM	Ang4	M KO	35	20.2777	23.2539	-2.97612	-2.85192		F KO	S9	-2.19137	0.695693	0.617413	1.82148	2.252	0.22888
G10	FAM	Ang4			20.4954	23.2231	-2.72772			F KO	S10	-3.21907	-0.332007	1.25876
G11	FAM	Ang4	M KO	54	22.0613	24.1606	-2.0993	-2.17988		F KO	9	-2.49848	0.388586	0.763878
G12	FAM	Ang4			22.1792	24.4396	-2.26045			F KO	67	-4.33383	-1.44677	2.72596
H09	FAM	Ang4	F WT	65	22.3474	24.5535	-2.20612	-2.2963		F KO	68	-3.19049	-0.303426	1.23407
H10	FAM	Ang4			22.3186	24.705	-2.38647			F KO	76	-2.93796	-0.0509003	1.03591
H11	FAM	Ang4	F KO	67	21.3217	25.5212	-4.19946	-4.33383		F KO	78	-4.99821	-2.11115	4.32036
H12	FAM	Ang4			21.3898	25.858	-4.4682			F KO	92	-3.50708	-0.620014	1.53689
C01	FAM	Ang4	F KO	68	21.0773	24.2695	-3.19222	-3.19049		F KO	49	-2.98154	-0.0944814	1.06768
C02	FAM	Ang4			20.9157	24.1044	-3.18876			F KO	58	-5.85155	-2.96449	7.8055
C03	FAM	Ang4	F WT	69	21.1263	23.9787	-2.85238	-2.89279		F KO	1	-1.02727	1.85979	0.275517
C04	FAM	Ang4			21.1625	24.0957	-2.9332			F KO	2	-2.23655	0.650507	0.637057
C05	FAM	Ang4	F WT	70	19.6519	23.0406	-3.38863	-3.32196		F KO	3	-2.4555	0.431557	0.741461
C06	FAM	Ang4			19.537	22.7923	-3.25529			F KO	10	-3.4529	-0.565835	1.48024
C07	FAM	Ang4	F KO	76	20.944	24.0038	-3.05988	-2.93796
C08	FAM	Ang4			21.0103	23.8264	-2.81604
C09	FAM	Ang4	F KO	78	21.7987	26.8662	-5.06744	-4.99821
C10	FAM	Ang4			21.6448	26.5737	-4.92899
C11	FAM	Ang4	F KO	92	19.3975	23.0401	-3.64263	-3.50708
C12	FAM	Ang4			19.5378	22.9093	-3.37152
F01	FAM	Ang4	M KO	11	21.0727	24.0762	-3.00352	-3.02972
F02	FAM	Ang4			20.9831	24.039	-3.05591
F03	FAM	Ang4	M WT	12	20.0868	23.3158	-3.22899	-3.21516
F04	FAM	Ang4			20.0359	23.2372	-3.20133
F05	FAM	Ang4	M WT	37	20.5736	24.1998	-3.62619	-3.52413
F06	FAM	Ang4			20.6025	24.0246	-3.42207
F07	FAM	Ang4	M WT	46	19.8387	22.8671	-3.02843	-2.9601
F08	FAM	Ang4			19.7279	22.6196	-2.89177
F09	FAM	Ang4	M WT	63	19.4843	22.4368	-2.95244	-2.91223
F10	FAM	Ang4			19.359	22.231	-2.87203
F11	FAM	Ang4	F KO	49	19.6392	22.4803	-2.84104	-2.98154
F12	FAM	Ang4			19.6124	22.7344	-3.12205
G09	FAM	Ang4	M WT	51	17.81	22.129	-4.31895	-4.21272
G10	FAM	Ang4			17.9938	22.1003	-4.10649
G11	FAM	Ang4	M KO	53	21.7895	24.836	-3.04642	-3.05122
G12	FAM	Ang4			22.0087	25.0647	-3.05601
H09	FAM	Ang4	M WT	55	20.3513	23.7172	-3.36585	-3.28353
H10	FAM	Ang4			20.4214	23.6226	-3.20121
H11	FAM	Ang4	F KO	58	17.4197	23.1637	-5.74401	-5.85155
H12	FAM	Ang4			17.3938	23.3528	-5.95909
C01	Cy5	Pla2g4c	M WT	44	27.8304	24.1473	3.68318	3.67678
C02	Cy5	Pla2g4c			27.8891	24.2188	3.67038				Male	Ave. dCt	2.20296
C03	Cy5	Pla2g4c	M WT	65	29.172	25.1191	4.05291	4.14408			Pla2g4c	dCt	ddCt	Fold Change	Ave. Fold	Std dev	Ttest
C04	Cy5	Pla2g4c			29.5543	25.319	4.23525			M WT	44	3.67678	1.47382	0.360028	1.88355	3.52515
C05	Cy5	Pla2g4c	M KO	67	27.041	24.3627	2.67831	2.71899		M WT	65	4.14408	1.94112	0.260414
C06	Cy5	Pla2g4c			27.102	24.3424	2.75967			M WT	73	4.31691	2.11395	0.231014
C07	Cy5	Pla2g4c	M WT	73	30.2237	26.0167	4.20696	4.31691		M WT	78	4.04617	1.84321	0.2787
C08	Cy5	Pla2g4c			30.5461	26.1192	4.42685			M WT	81	4.78503	2.58207	0.167001
C09	Cy5	Pla2g4c	M KO	74	28.2488	25.1395	3.10929	3.20656		M WT	85	2.24583	0.042872	0.970721
C10	Cy5	Pla2g4c			27.9813	24.6774	3.30383			M WT	87	-1.77449	-3.97745	15.7519
C11	Cy5	Pla2g4c	M WT	78	34.6158	30.1775	4.43827	4.04617		M WT	90	2.42382	0.220857	0.858056
C12	Cy5	Pla2g4c			34.3629	30.7088	3.65408			M WT	96	1.94235	-0.260613	1.19799
F01	Cy5	Pla2g4c	M WT	81	29.6292	24.7154	4.91385	4.78503		M WT	98	3.38217	1.17921	0.441593
F02	Cy5	Pla2g4c			29.4417	24.7855	4.65621			M WT	S1	-0.366861	-2.56982	5.93736
F03	Cy5	Pla2g4c	M WT	85	27.3142	25.0394	2.27484	2.24583		M WT	S4	2.84626	0.643303	0.640245
F04	Cy5	Pla2g4c			27.4126	25.1958	2.21682			M WT	S6	0.848937	-1.35402	2.55624
F05	Cy5	Pla2g4c	M KO	87	26.9349	24.6559	2.27894	2.35217		M WT	S7	0.741824	-1.46114	2.75325
F06	Cy5	Pla2g4c			27.0844	24.659	2.42539			M WT	12	2.25475	0.0517854	0.964742
F07	Cy5	Pla2g4c	M KO	88	20.5578	27.6337	-7.07585	-7.06592		M WT	37	2.24372	0.0407596	0.972143
F08	Cy5	Pla2g4c			20.6583	27.7142	-7.05598			M WT	46	1.53356	-0.669398	1.59041
F09	Cy5	Pla2g4c	M KO	86	25.3192	23.0178	2.30146	2.32714		M WT	63	3.32547	1.1225	0.459296
F10	Cy5	Pla2g4c			25.3971	23.0442	2.35282			M WT	51	3.31497	1.11201	0.462649
F11	Cy5	Pla2g4c	M WT	87	20.7719	22.4888	-1.71683	-1.77449		M WT	55	2.49397	0.291014	0.817327
F12	Cy5	Pla2g4c			20.912	22.7441	-1.83215			M WT	13	2.20925	0.00629268	0.995648
G09	Cy5	Pla2g4c	M WT	90	24.7953	22.3271	2.46826	2.42382		M WT	14	2.99726	0.794296	0.576625
G10	Cy5	Pla2g4c			24.8892	22.5098	2.37937			M WT	16	1.0789	-1.12406	2.1796
G11	Cy5	Pla2g4c	M WT	96	28.2558	26.3211	1.93468	1.94235		M WT	17	-1.8396	-4.04257	16.4791
G12	Cy5	Pla2g4c			28.5013	26.5513	1.95002			M KO	67	2.71899	0.51603	0.699294	49.0979	170.631	0.221401
H09	Cy5	Pla2g4c	M WT	98	27.3803	23.8953	3.48509	3.38217		M KO	74	3.20656	1.0036	0.498754
H10	Cy5	Pla2g4c			27.103	23.8237	3.27925			M KO	87	2.35217	0.149208	0.901746
H11	Cy5	Pla2g4c	M KO	5	23.678	25.0428	-1.36473	-1.38857		M KO	88	-7.06592	-9.26888	616.894
H12	Cy5	Pla2g4c			23.9165	25.3289	-1.41242			M KO	86	2.32714	0.124182	0.917524
C01	Cy5	Pla2g4c	M KO	9	26.609	23.0731	3.53591	3.69054		M KO	5	-1.38857	-3.59153	12.0548
C02	Cy5	Pla2g4c			26.4737	22.6285	3.84518			M KO	9	3.69054	1.48758	0.35661
C03	Cy5	Pla2g4c	M WT	S1	22.8023	23.1444	-0.342112	-0.366861		M KO	S2	0.81243	-1.39053	2.62175
C04	Cy5	Pla2g4c			23.0455	23.4371	-0.39161			M KO	30	4.0999	1.89694	0.268512
C05	Cy5	Pla2g4c	M KO	S2	23.1976	22.4373	0.760377	0.81243		M KO	35	3.89113	1.68817	0.310321
C06	Cy5	Pla2g4c			23.054	22.1896	0.864483			M KO	54	1.48953	-0.713428	1.6397
C07	Cy5	Pla2g4c	M WT	S4	25.0091	22.1782	2.8309	2.84626		M KO	11	2.84988	0.646916	0.638644
C08	Cy5	Pla2g4c			25.0768	22.2152	2.86163			M KO	53	3.28866	1.0857	0.471162
C09	Cy5	Pla2g4c	M WT	S6	24.0561	23.295	0.761133	0.848937		M KO	11	1.83858	-0.364385	1.28733
C10	Cy5	Pla2g4c			23.9586	23.0219	0.93674			M KO	12	2.84746	0.644502	0.639713
C11	Cy5	Pla2g4c	M WT	S7	23.0924	22.2533	0.839134	0.741824
C12	Cy5	Pla2g4c			23.3708	22.7263	0.644514				Female	Ave. dCt	1.71924
F01	Cy5	Pla2g4c	F KO	S9	25.031	23.1168	1.9142	2.05964			Pla2g4c	dCt	ddCt	Fold Change	Ave. Fold	Std dev	Ttest
F02	Cy5	Pla2g4c			25.0592	22.8541	2.20508			F WT	S11	0.766154	-0.953081	1.936	1.39555	0.639643
F03	Cy5	Pla2g4c	F KO	S10	24.7406	22.5421	2.19846	2.20429		F WT	S12	2.00846	0.289228	0.81834
F04	Cy5	Pla2g4c			24.7243	22.5142	2.21012			F WT	65	0.599584	-1.11965	2.17295
F05	Cy5	Pla2g4c	F WT	S11	22.3945	21.6977	0.696823	0.766154		F WT	69	1.3599	-0.359337	1.28284
F06	Cy5	Pla2g4c			22.4835	21.648	0.835485			F WT	70	2.10072	0.381481	0.767649
F07	Cy5	Pla2g4c	F WT	S12	24.3149	22.2956	2.0193	2.00846		F WT	66	2.24404	0.524809	0.695051
F08	Cy5	Pla2g4c			24.2854	22.2878	1.99763			F WT	4	-1.85618	-3.57542	11.9209
F09	Cy5	Pla2g4c	F KO	9	26.3855	23.7728	2.61266	2.68105		F WT	5	-3.07663	-4.79587	27.778
F10	Cy5	Pla2g4c			26.1372	23.3878	2.74943			F WT	6	1.61384	-0.105395	1.07579
F11	Cy5	Pla2g4c	M KO	30	27.5174	23.3156	4.20187	4.0999		F WT	7	2.70823	0.988991	0.50383
F12	Cy5	Pla2g4c			27.419	23.4211	3.99793			F WT	8	1.69572	-0.0235126	1.01643
G09	Cy5	Pla2g4c	M KO	35	27.0923	23.2539	3.8384	3.89113		F WT	9	2.0957	0.376468	0.770321
G10	Cy5	Pla2g4c			27.167	23.2231	3.94386			F WT	15	-4.54042	-6.25965	76.6203
G11	Cy5	Pla2g4c	M KO	54	25.6699	24.1606	1.50931	1.48953		F KO	S9	2.05964	0.340405	0.789819	1.65787	2.24595	0.805148
G12	Cy5	Pla2g4c			25.9094	24.4396	1.46976			F KO	S10	2.20429	0.485051	0.714472
H09	Cy5	Pla2g4c	F WT	65	25.2513	24.5535	0.697819	0.599584		F KO	9	2.68105	0.96181	0.513412
H10	Cy5	Pla2g4c			25.2064	24.705	0.501348			F KO	67	1.37191	-0.347327	1.2722
H11	Cy5	Pla2g4c	F KO	67	27.0585	25.5212	1.53734	1.37191		F KO	68	1.29514	-0.4241	1.34174
H12	Cy5	Pla2g4c			27.0645	25.858	1.20647			F KO	76	1.54997	-0.169268	1.12449
C01	Cy5	Pla2g4c	F KO	68	25.4592	24.2695	1.18963	1.29514		F KO	78	0.908816	-0.81042	1.75372
C02	Cy5	Pla2g4c			25.5051	24.1044	1.40064			F KO	92	1.87599	0.156759	0.897038
C03	Cy5	Pla2g4c	F WT	69	25.3621	23.9787	1.38339	1.3599		F KO	49	3.75936	2.04013	0.243142
C04	Cy5	Pla2g4c			25.4321	24.0957	1.3364			F KO	58	-1.26784	-2.98708	7.92866
C05	Cy5	Pla2g4c	F WT	70	25.0557	23.0406	2.01519	2.10072		F KO	1	1.92804	0.208803	0.865255
C06	Cy5	Pla2g4c			24.9786	22.7923	2.18625			F KO	2	1.53999	-0.179246	1.13229
C07	Cy5	Pla2g4c	F KO	76	25.4558	24.0038	1.45195	1.54997		F KO	3	1.17184	-0.547398	1.46145
C08	Cy5	Pla2g4c			25.4744	23.8264	1.64798			F KO	10	-1.66057	-3.3798	10.4093
C09	Cy5	Pla2g4c	F KO	78	27.6888	26.8662	0.822651	0.908816
C10	Cy5	Pla2g4c			27.5687	26.5737	0.994981
C11	Cy5	Pla2g4c	F KO	92	24.8885	23.0401	1.84838	1.87599
C12	Cy5	Pla2g4c			24.8129	22.9093	1.90361
F01	Cy5	Pla2g4c	M KO	11	26.9309	24.0762	2.85471	2.84988
F02	Cy5	Pla2g4c			26.8841	24.039	2.84504
F03	Cy5	Pla2g4c	M WT	12	25.5887	23.3158	2.2729	2.25475
F04	Cy5	Pla2g4c			25.4738	23.2372	2.23659
F05	Cy5	Pla2g4c	M WT	37	26.3378	24.1998	2.13805	2.24372
F06	Cy5	Pla2g4c			26.3739	24.0246	2.34939
F07	Cy5	Pla2g4c	M WT	46	24.3104	22.8671	1.44332	1.53356
F08	Cy5	Pla2g4c			24.2434	22.6196	1.62381
F09	Cy5	Pla2g4c	M WT	63	25.7264	22.4368	3.28962	3.32547
F10	Cy5	Pla2g4c			25.5923	22.231	3.36131
F11	Cy5	Pla2g4c	F KO	49	26.3969	22.4803	3.91668	3.75936
F12	Cy5	Pla2g4c			26.3365	22.7344	3.60204
G09	Cy5	Pla2g4c	M WT	51	25.3087	22.129	3.17969	3.31497
G10	Cy5	Pla2g4c			25.5506	22.1003	3.45025
G11	Cy5	Pla2g4c	M KO	53	28.154	24.836	3.31806	3.28866
G12	Cy5	Pla2g4c			28.324	25.0647	3.25927
H09	Cy5	Pla2g4c	M WT	55	26.1634	23.7172	2.44618	2.49397			Male	Ave. dCt	6.62396
H10	Cy5	Pla2g4c			26.1644	23.6226	2.54177				Slfn1	dCt	ddCt	Fold Change	Ave. Fold	Std dev	Ttest
H11	Cy5	Pla2g4c	F KO	58	22.0456	23.1637	-1.11809	-1.26784		M WT	44	7.65331	1.02935	0.48993	1.38537	1.04051
H12	Cy5	Pla2g4c			21.9353	23.3528	-1.4176			M WT	65	7.13444	0.510483	0.701987
B01	FAM	Slfn1	M WT	44	32.1792	24.4186	7.76064	7.65331		M WT	73	6.19556	-0.428395	1.34574
B02	FAM	Slfn1			31.7839	24.238	7.54598			M WT	78	8.12093	1.49697	0.354296
B03	FAM	Slfn1	M WT	65	32.6198	25.4906	7.12927	7.13444		M WT	81	5.98967	-0.634284	1.55217
B04	FAM	Slfn1			32.7479	25.6083	7.13961			M WT	85	7.00935	0.385392	0.765571
B05	FAM	Slfn1	M KO	67	31.1994	25.2578	5.94153	5.98569		M WT	87	5.31863	-1.30533	2.4714
B06	FAM	Slfn1			31.2562	25.2263	6.02985			M WT	90	5.31178	-1.31218	2.48316
B07	FAM	Slfn1	M WT	73	32.3613	26.083	6.2784	6.19556		M WT	96	7.32263	0.698672	0.616139
B08	FAM	Slfn1			32.3715	26.2588	6.11273			M WT	98	7.39133	0.76737	0.587488
B09	FAM	Slfn1	M KO	74	29.7471	24.7344	5.01273	4.92277		M WT	S1	9.38883	2.76487	0.147127
B10	FAM	Slfn1			29.8328	25	4.8328			M WT	S4	5.29405	-1.32991	2.51387
B11	FAM	Slfn1	M WT	78	39.2902	30.4605	8.82967	8.12093		M WT	S6	9.30917	2.68522	0.155478
B12	FAM	Slfn1			37.9325	30.5203	7.41219			M WT	S7	5.39466	-1.2293	2.34453
E01	FAM	Slfn1	M WT	81	31.2931	25.1867	6.10635	5.98967		M WT	12	4.58094	-2.04301	4.12106
E02	FAM	Slfn1			30.59	24.717	5.873			M WT	37	6.22112	-0.402835	1.3221
E03	FAM	Slfn1	M WT	85	32.0287	25.0639	6.96478	7.00935		M WT	46	6.56812	-0.0558345	1.03946
E04	FAM	Slfn1			32.4475	25.3936	7.05392			M WT	63	6.59967	-0.0242913	1.01698
E05	FAM	Slfn1	M KO	87	30.3966	24.9089	5.48763	5.52914		M WT	51	6.36048	-0.263474	1.20037
E06	FAM	Slfn1			30.3381	24.7675	5.57064			M WT	55	5.31448	-1.30948	2.47852
E07	FAM	Slfn1	M KO	88	32.6621	28.1515	4.51058	4.54399		M KO	67	5.98569	-0.638265	1.55646	2.19691	1.21557	0.0489724
E08	FAM	Slfn1			32.6399	28.0625	4.57741			M KO	74	4.92277	-1.70119	3.25169
E09	FAM	Slfn1	M KO	86	29.8325	23.1634	6.66915	6.65241		M KO	87	5.52914	-1.09482	2.13587
E10	FAM	Slfn1			29.9218	23.2861	6.63567			M KO	88	4.54399	-2.07996	4.22797
E11	FAM	Slfn1	M WT	87	28.0416	22.6844	5.35721	5.31863		M KO	86	6.65241	0.028453	0.980471
E12	FAM	Slfn1			27.8801	22.6001	5.28004			M KO	5	6.9149	0.290942	0.817368
G05	FAM	Slfn1	M WT	90	28.1825	22.9668	5.21571	5.31178		M KO	9	5.78677	-0.837185	1.78656
G06	FAM	Slfn1			28.0283	22.6205	5.40784			M KO	S2	9.79299	3.16903	0.11118
G07	FAM	Slfn1	M WT	96	33.7337	26.4352	7.29854	7.32263		M KO	30	4.68902	-1.93494	3.82363
G08	FAM	Slfn1			33.7113	26.3646	7.34672			M KO	35	6.03219	-0.591763	1.50709
H05	FAM	Slfn1	M WT	98	31.5718	24.1556	7.41618	7.39133		M KO	54	5.11645	-1.50751	2.84319
H06	FAM	Slfn1			31.3778	24.0114	7.36647			M KO	11	5.13138	-1.49258	2.81392
H07	FAM	Slfn1	M KO	5	32.1066	25.3207	6.78596	6.9149		M KO	53	5.18861	-1.43535	2.70447
H08	FAM	Slfn1			32.4383	25.3945	7.04384
B01	FAM	Slfn1	M KO	9	28.8847	23.059	5.82566	5.78677			Female	Ave. dCt	5.41455
B02	FAM	Slfn1			28.8028	23.0549	5.74788				Slfn1	dCt	ddCt	Fold Change	Ave. Fold	Std dev	Ttest
B03	FAM	Slfn1	M WT	S1	33.0386	23.7843	9.25425	9.38883		F WT	S11	6.01662	0.602064	0.658811	1.20984	0.829635
B04	FAM	Slfn1			33.1242	23.6008	9.5234			F WT	S12	6.03283	0.618274	0.65145
B05	FAM	Slfn1	M KO	S2	32.5363	22.7541	9.78226	9.79299		F WT	65	4.21186	-1.2027	2.30169
B06	FAM	Slfn1			32.4788	22.6751	9.80371			F WT	69	4.48388	-0.930673	1.90616
B07	FAM	Slfn1	M WT	S4	27.8328	22.6359	5.19699	5.29405		F WT	70	6.32758	0.91303	0.531068
B08	FAM	Slfn1			27.9755	22.5844	5.39111			F KO	S9	5.28789	-0.126664	1.09177	1.10912	0.635087	0.79712
B09	FAM	Slfn1	M WT	S6	32.7007	23.3815	9.31916	9.30917		F KO	S10	5.83999	0.425438	0.744613
B10	FAM	Slfn1			32.4678	23.1687	9.29919			F KO	9	5.5377	0.123148	0.918182
B11	FAM	Slfn1	M WT	S7	28.2484	22.7996	5.44886	5.39466		F KO	67	4.27963	-1.13492	2.19607
B12	FAM	Slfn1			28.2404	22.8999	5.34046			F KO	68	4.75401	-0.660543	1.58068
E01	FAM	Slfn1	F KO	S9	28.6369	23.2752	5.36171	5.28789		F KO	76	5.09497	-0.319586	1.24797
E02	FAM	Slfn1			28.3521	23.138	5.21407			F KO	78	4.4499	-0.964649	1.95159
E03	FAM	Slfn1	F KO	S10	28.41	22.5261	5.88396	5.83999		F KO	92	6.14743	0.732879	0.601702
E04	FAM	Slfn1			28.5194	22.7233	5.79602			F KO	49	6.63597	1.22142	0.428861
E05	FAM	Slfn1	F WT	S11	28.1043	22.0654	6.03891	6.01662		F KO	58	7.0148	1.60025	0.329819
E06	FAM	Slfn1			28.1754	22.1811	5.99432
E07	FAM	Slfn1	F WT	S12	28.5922	22.5479	6.04435	6.03283
E08	FAM	Slfn1			28.4793	22.458	6.0213
E09	FAM	Slfn1	F KO	9	29.3061	23.8148	5.49132	5.5377
E10	FAM	Slfn1			29.4815	23.8974	5.58408
E11	FAM	Slfn1	M KO	30	28.1965	23.4938	4.70272	4.68902
E12	FAM	Slfn1			28.3109	23.6356	4.67531
G05	FAM	Slfn1	M KO	35	29.3234	23.3267	5.99672	6.03219
G06	FAM	Slfn1			29.3873	23.3196	6.06767
G07	FAM	Slfn1	M KO	54	29.1834	24.0525	5.13086	5.11645
G08	FAM	Slfn1			29.0872	23.9852	5.10203
H05	FAM	Slfn1	F WT	65	29.2103	24.9309	4.27932	4.21186
H06	FAM	Slfn1			28.8545	24.7101	4.14439
H07	FAM	Slfn1	F KO	67	30.0699	25.787	4.28293	4.27963
H08	FAM	Slfn1			30.0916	25.8153	4.27633
B01	FAM	Slfn1	F KO	68	29.119	24.3987	4.72039	4.75401
B02	FAM	Slfn1			29.1578	24.3702	4.78763
B03	FAM	Slfn1	F WT	69	29.1975	24.6996	4.49784	4.48388
B04	FAM	Slfn1			28.877	24.4071	4.46991
B05	FAM	Slfn1	F WT	70	29.3878	23.1187	6.26905	6.32758
B06	FAM	Slfn1			29.599	23.2129	6.38612
B07	FAM	Slfn1	F KO	76	29.282	24.1307	5.15133	5.09497
B08	FAM	Slfn1			29.3648	24.3262	5.0386
B09	FAM	Slfn1	F KO	78	31.4288	27.04	4.38877	4.4499
B10	FAM	Slfn1			31.4436	26.9326	4.51103
B11	FAM	Slfn1	F KO	92	29.1263	23.0788	6.04743	6.14743
B12	FAM	Slfn1			29.3411	23.0937	6.24743
E01	FAM	Slfn1	M KO	11	29.6264	24.4943	5.13208	5.13138
E02	FAM	Slfn1			29.2361	24.1054	5.13068
E03	FAM	Slfn1	M WT	12	28.1614	23.5749	4.5865	4.58094
E04	FAM	Slfn1			28.1513	23.5759	4.57538
E05	FAM	Slfn1	M WT	37	30.4713	24.2578	6.21349	6.22112
E06	FAM	Slfn1			30.514	24.2852	6.22875
E07	FAM	Slfn1	M WT	46	29.761	23.2028	6.5582	6.56812
E08	FAM	Slfn1			29.7528	23.1748	6.57804
E09	FAM	Slfn1	M WT	63	29.0355	22.4841	6.5514	6.59967
E10	FAM	Slfn1			29.2198	22.5719	6.64793
E11	FAM	Slfn1	F KO	49	29.2682	22.5849	6.68333	6.63597
E12	FAM	Slfn1			29.363	22.7744	6.58861
G05	FAM	Slfn1	M WT	51	28.5334	22.2025	6.33084	6.36048
G06	FAM	Slfn1			28.58	22.1899	6.39012
G07	FAM	Slfn1	M KO	53	30.0023	24.8545	5.1478	5.18861
G08	FAM	Slfn1			29.8546	24.6252	5.22943
H05	FAM	Slfn1	M WT	55	29.3018	23.9916	5.31024	5.31448			Male	Ave. dCt	0.507133
H06	FAM	Slfn1			29.1842	23.8655	5.31872				Slfn2	dCt	ddCt	Fold Change	Ave. Fold	Std dev	Ttest
H07	FAM	Slfn1	F KO	58	30.3381	23.2465	7.09161	7.0148		M WT	44	-0.999665	-1.5068	2.84179	1.3469	0.956202
H08	FAM	Slfn1			30.4515	23.5135	6.938			M WT	65	-0.176043	-0.683176	1.60567
A01	HEX	Slfn2	M WT	44	23.3575	24.4186	-1.06105	-0.999665		M WT	73	-1.14833	-1.65547	3.15025
A02	HEX	Slfn2			23.2997	24.238	-0.938283			M WT	78	0.730083	0.22295	0.856812
A03	HEX	Slfn2	M WT	65	25.4464	25.4906	-0.0441299	-0.176043		M WT	81	-0.249869	-0.757002	1.68998
A04	HEX	Slfn2			25.3003	25.6083	-0.307956			M WT	85	0.291974	-0.21516	1.16083
A05	HEX	Slfn2	M KO	67	25.2486	25.2578	-0.00922219	0.107072		M WT	87	0.0451106	-0.462023	1.37747
A06	HEX	Slfn2			25.4497	25.2263	0.223367			M WT	90	-0.585311	-1.09244	2.13235
A07	HEX	Slfn2	M WT	73	25.171	26.083	-0.911932	-1.14833		M WT	96	1.37226	0.865125	0.548999
A08	HEX	Slfn2			24.874	26.2588	-1.38474			M WT	98	2.12297	1.61583	0.326276
A09	HEX	Slfn2	M KO	74	24.3377	24.7344	-0.396652	-0.491689		M WT	S1	2.85129	2.34415	0.196943
A10	HEX	Slfn2			24.4132	25	-0.586727			M WT	S4	-0.115695	-0.622828	1.53989
A11	HEX	Slfn2	M WT	78	31.4169	30.4605	0.956352	0.730083		M WT	S6	2.94193	2.4348	0.184949
A12	HEX	Slfn2			31.0241	30.5203	0.503815			M WT	S7	0.0286446	-0.478489	1.39328
D01	HEX	Slfn2	M WT	81	24.8035	25.1867	-0.383196	-0.249869		M WT	12	-1.19496	-1.70209	3.25373
D02	HEX	Slfn2			24.6005	24.717	-0.116542			M WT	37	1.30457	0.797438	0.57537
D03	HEX	Slfn2	M WT	85	25.5764	25.0639	0.512567	0.291974		M WT	46	1.17281	0.665677	0.630393
D04	HEX	Slfn2			25.4649	25.3936	0.0713812			M WT	63	1.62239	1.11525	0.46161
D05	HEX	Slfn2	M KO	87	25.3255	24.9089	0.416529	0.451461		M WT	51	0.727994	0.220861	0.858053
D06	HEX	Slfn2			25.2539	24.7675	0.486394			M WT	55	-0.599475	-1.10661	2.15339
D07	HEX	Slfn2	M KO	88	27.3501	28.1515	-0.801476	-0.818608		M KO	67	0.107072	-0.400061	1.31956	1.27684	0.749202	0.824993
D08	HEX	Slfn2			27.2268	28.0625	-0.835741			M KO	74	-0.491689	-0.998823	1.99837
D09	HEX	Slfn2	M KO	86	24.0096	23.1634	0.846227	0.83858		M KO	87	0.451461	-0.0556723	1.03934
D10	HEX	Slfn2			24.1171	23.2861	0.830934			M KO	88	-0.818608	-1.32574	2.50662
D11	HEX	Slfn2	M WT	87	22.4688	22.6844	-0.215676	0.0451106		M KO	86	0.83858	0.331447	0.794739
D12	HEX	Slfn2			22.906	22.6001	0.305897			M KO	5	1.83661	1.32948	0.397912
G01	HEX	Slfn2	M WT	90	22.1776	22.9668	-0.789146	-0.585311		M KO	9	1.46847	0.961337	0.513581
G02	HEX	Slfn2			22.239	22.6205	-0.381476			M KO	S2	3.30907	2.80194	0.143394
G03	HEX	Slfn2	M WT	96	27.7275	26.4352	1.29229	1.37226		M KO	30	-0.660828	-1.16796	2.24694
G04	HEX	Slfn2			27.8168	26.3646	1.45222			M KO	35	0.995578	0.488445	0.712793
H01	HEX	Slfn2	M WT	98	26.2011	24.1556	2.04555	2.12297		M KO	54	0.00971022	-0.497423	1.41169
H02	HEX	Slfn2			26.2118	24.0114	2.20038			M KO	11	-0.195132	-0.702266	1.62706
H03	HEX	Slfn2	M KO	5	27.1165	25.3207	1.79586	1.83661		M KO	53	-0.408891	-0.916024	1.88691
H04	HEX	Slfn2			27.2719	25.3945	1.87736
A01	HEX	Slfn2	M KO	9	24.334	23.059	1.27495	1.46847			Female	Ave. dCt	-0.565891
A02	HEX	Slfn2			24.7169	23.0549	1.66199				Slfn2	dCt	ddCt	Fold Change	Ave. Fold	Std dev	Ttest
A03	HEX	Slfn2	M WT	S1	26.588	23.7843	2.80362	2.85129		F WT	S11	0.822131	1.38802	0.382088	1.17095	0.619293
A04	HEX	Slfn2			26.4998	23.6008	2.89895			F WT	S12	-1.195	-0.629112	1.54661
A05	HEX	Slfn2	M KO	S2	25.9789	22.7541	3.22483	3.30907		F WT	65	-1.29183	-0.725944	1.65398
A06	HEX	Slfn2			26.0684	22.6751	3.39332			F WT	69	-1.29115	-0.725255	1.65319
A07	HEX	Slfn2	M WT	S4	22.5383	22.6359	-0.0975228	-0.115695		F WT	70	0.126398	0.692289	0.618871
A08	HEX	Slfn2			22.4505	22.5844	-0.133867			F KO	S9	-0.024845	0.541046	0.687272	1.18246	0.727786	0.976372
A09	HEX	Slfn2	M WT	S6	26.2499	23.3815	2.86842	2.94193		F KO	S10	-0.284265	0.281626	0.822663
A10	HEX	Slfn2			26.1841	23.1687	3.01544			F KO	9	-1.32622	-0.760333	1.69388
A11	HEX	Slfn2	M WT	S7	22.8397	22.7996	0.0401434	0.0286446		F KO	67	-1.98832	-1.42243	2.68037
A12	HEX	Slfn2			22.917	22.8999	0.0171458			F KO	68	-1.5367	-0.970809	1.95994
D01	HEX	Slfn2	F KO	S9	23.1078	23.2752	-0.167334	-0.024845		F KO	76	-0.790501	-0.22461	1.16846
D02	HEX	Slfn2			23.2557	23.138	0.117645			F KO	78	-0.816092	-0.250201	1.18937
D03	HEX	Slfn2	F KO	S10	22.4553	22.5261	-0.0707329	-0.284265		F KO	92	-0.0521782	0.513713	0.700418
D04	HEX	Slfn2			22.2255	22.7233	-0.497797			F KO	49	0.351266	0.917157	0.529551
D05	HEX	Slfn2	F WT	S11	22.8507	22.0654	0.785324	0.822131		F KO	58	0.782622	1.34851	0.392696
D06	HEX	Slfn2			23.0401	22.1811	0.858938
D07	HEX	Slfn2	F WT	S12	21.3772	22.5479	-1.1707	-1.195
D08	HEX	Slfn2			21.2387	22.458	-1.21931
D09	HEX	Slfn2	F KO	9	22.6019	23.8148	-1.21287	-1.32622
D10	HEX	Slfn2			22.4578	23.8974	-1.43958
D11	HEX	Slfn2	M KO	30	22.9957	23.4938	-0.498106	-0.660828
D12	HEX	Slfn2			22.812	23.6356	-0.82355
G01	HEX	Slfn2	M KO	35	24.4517	23.3267	1.12503	0.995578
G02	HEX	Slfn2			24.1857	23.3196	0.866127
G03	HEX	Slfn2	M KO	54	24.0314	24.0525	-0.021073	0.00971022
G04	HEX	Slfn2			24.0257	23.9852	0.0404934
H01	HEX	Slfn2	F WT	65	23.4565	24.9309	-1.47446	-1.29183
H02	HEX	Slfn2			23.6009	24.7101	-1.10921
H03	HEX	Slfn2	F KO	67	23.9303	25.787	-1.85666	-1.98832
H04	HEX	Slfn2			23.6953	25.8153	-2.11999
A01	HEX	Slfn2	F KO	68	22.8585	24.3987	-1.54016	-1.5367
A02	HEX	Slfn2			22.8369	24.3702	-1.53324
A03	HEX	Slfn2	F WT	69	23.261	24.6996	-1.43862	-1.29115
A04	HEX	Slfn2			23.2634	24.4071	-1.14367
A05	HEX	Slfn2	F WT	70	23.3363	23.1187	0.21756	0.126398
A06	HEX	Slfn2			23.2481	23.2129	0.0352366
A07	HEX	Slfn2	F KO	76	23.4261	24.1307	-0.704594	-0.790501
A08	HEX	Slfn2			23.4498	24.3262	-0.876408
A09	HEX	Slfn2	F KO	78	26.2038	27.04	-0.836157	-0.816092
A10	HEX	Slfn2			26.1365	26.9326	-0.796027
A11	HEX	Slfn2	F KO	92	23.0332	23.0788	-0.0456265	-0.0521782
A12	HEX	Slfn2			23.035	23.0937	-0.0587299
D01	HEX	Slfn2	M KO	11	24.1743	24.4943	-0.320019	-0.195132
D02	HEX	Slfn2			24.0352	24.1054	-0.0702463
D03	HEX	Slfn2	M WT	12	22.3921	23.5749	-1.18279	-1.19496
D04	HEX	Slfn2			22.3688	23.5759	-1.20713
D05	HEX	Slfn2	M WT	37	25.6886	24.2578	1.43086	1.30457
D06	HEX	Slfn2			25.4635	24.2852	1.17828
D07	HEX	Slfn2	M WT	46	24.3702	23.2028	1.16746	1.17281
D08	HEX	Slfn2			24.3529	23.1748	1.17816
D09	HEX	Slfn2	M WT	63	24.175	22.4841	1.69087	1.62239
D10	HEX	Slfn2			24.1258	22.5719	1.5539
D11	HEX	Slfn2	F KO	49	23.0385	22.5849	0.453669	0.351266
D12	HEX	Slfn2			23.0232	22.7744	0.248864
G01	HEX	Slfn2	M WT	51	22.8897	22.2025	0.687175	0.727994
G02	HEX	Slfn2			22.9587	22.1899	0.768813
G03	HEX	Slfn2	M KO	53	24.3644	24.8545	-0.490089	-0.408891
G04	HEX	Slfn2			24.2975	24.6252	-0.327692
H01	HEX	Slfn2	M WT	55	23.3104	23.9916	-0.681111	-0.599475			Male	Ave. dCt	4.30628
H02	HEX	Slfn2			23.3477	23.8655	-0.517838				Slfn5	dCt	ddCt	Fold Change	Ave. Fold	Std dev	Ttest
H03	HEX	Slfn2	F KO	58	24.1018	23.2465	0.855299	0.782622		M WT	44	3.41978	-0.8865	1.84869	1.17687	0.686978
H04	HEX	Slfn2			24.2234	23.5135	0.709946			M WT	65	3.7007	-0.605585	1.5216
A01	Cy5	Slfn5	M WT	44	27.7456	24.4186	3.32709	3.41978		M WT	73	3.10919	-1.19709	2.29277
A02	Cy5	Slfn5			27.7504	24.238	3.51247			M WT	78	4.48945	0.18317	0.880765
A03	Cy5	Slfn5	M WT	65	29.2988	25.4906	3.80827	3.7007		M WT	81	2.91894	-1.38734	2.61596
A04	Cy5	Slfn5			29.2014	25.6083	3.59312			M WT	85	4.79483	0.488547	0.712743
A05	Cy5	Slfn5	M KO	67	28.4972	25.2578	3.23935	3.40287		M WT	87	4.52153	0.215252	0.861396
A06	Cy5	Slfn5			28.7927	25.2263	3.56639			M WT	90	4.89801	0.591725	0.663549
A07	Cy5	Slfn5	M WT	73	29.3036	26.083	3.22064	3.10919		M WT	96	4.30447	-0.00181453	1.00126
A08	Cy5	Slfn5			29.2565	26.2588	2.99774			M WT	98	5.48586	1.17958	0.441479
A09	Cy5	Slfn5	M KO	74	27.9546	24.7344	3.2202	2.95013		M WT	S1	5.6851	1.37881	0.384535
A10	Cy5	Slfn5			27.68	25	2.68006			M WT	S4	4.81736	0.511083	0.701695
A11	Cy5	Slfn5	M WT	78	34.981	30.4605	4.52051	4.48945		M WT	S6	5.72762	1.42133	0.373367
A12	Cy5	Slfn5			34.9787	30.5203	4.45839			M WT	S7	5.01837	0.712084	0.610438
D01	Cy5	Slfn5	M WT	81	27.8278	25.1867	2.64109	2.91894		M WT	12	3.10866	-1.19762	2.29361
D02	Cy5	Slfn5			27.9138	24.717	3.19679			M WT	37	4.45249	0.146207	0.903623
D03	Cy5	Slfn5	M WT	85	30.0738	25.0639	5.00996	4.79483		M WT	46	4.34116	0.034879	0.976114
D04	Cy5	Slfn5			29.9733	25.3936	4.5797			M WT	63	3.79457	-0.511711	1.42574
D05	Cy5	Slfn5	M KO	87	28.286	24.9089	3.37703	3.503		M WT	51	4.19096	-0.115317	1.08321
D06	Cy5	Slfn5			28.3964	24.7675	3.62896			M WT	55	3.34658	-0.959698	1.9449
D07	Cy5	Slfn5	M KO	88	30.343	28.1515	2.19148	2.16246		M KO	67	3.40287	-0.903412	1.87048	1.74863	1.04578	0.0666126
D08	Cy5	Slfn5			30.1959	28.0625	2.13344			M KO	74	2.95013	-1.35615	2.56001
D09	Cy5	Slfn5	M KO	86	26.0244	23.1634	2.86103	2.88091		M KO	87	3.503	-0.803284	1.74507
D10	Cy5	Slfn5			26.1869	23.2861	2.90078			M KO	88	2.16246	-2.14382	4.41931
D11	Cy5	Slfn5	M WT	87	26.9434	22.6844	4.25899	4.52153		M KO	86	2.88091	-1.42538	2.68584
D12	Cy5	Slfn5			27.3841	22.6001	4.78407			M KO	5	4.90501	0.59873	0.660335
G01	Cy5	Slfn5	M WT	90	27.5641	22.9668	4.59736	4.89801		M KO	9	3.68299	-0.623292	1.54039
G02	Cy5	Slfn5			27.8191	22.6205	5.19865			M KO	S2	5.86424	1.55796	0.33963
G03	Cy5	Slfn5	M WT	96	30.6914	26.4352	4.25619	4.30447		M KO	30	3.61875	-0.687532	1.61053
G04	Cy5	Slfn5			30.7173	26.3646	4.35275			M KO	35	4.77266	0.466382	0.723777
H01	Cy5	Slfn5	M WT	98	29.5611	24.1556	5.40549	5.48586		M KO	54	3.76618	-0.540103	1.45408
H02	Cy5	Slfn5			29.5776	24.0114	5.56624			M KO	11	3.65115	-0.655129	1.57476
H03	Cy5	Slfn5	M KO	5	30.3242	25.3207	5.00357	4.90501		M KO	53	3.6759	-0.630383	1.54798
H04	Cy5	Slfn5			30.201	25.3945	4.80645
A01	Cy5	Slfn5	M KO	9	26.4357	23.059	3.37671	3.68299			Female	Ave. dCt	3.4757
A02	Cy5	Slfn5			27.0442	23.0549	3.98927				Slfn5	dCt	ddCt	Fold Change	Ave. Fold	Std dev	Ttest
A03	Cy5	Slfn5	M WT	S1	29.4479	23.7843	5.6636	5.6851		F WT	S11	5.58807	2.11236	0.231268	1.25946	0.74494
A04	Cy5	Slfn5			29.3074	23.6008	5.70659			F WT	S12	3.29542	-0.180278	1.1331
A05	Cy5	Slfn5	M KO	S2	28.3098	22.7541	5.55579	5.86424		F WT	65	2.37822	-1.09748	2.13981
A06	Cy5	Slfn5			28.8478	22.6751	6.1727			F WT	69	2.62354	-0.852164	1.80521
A07	Cy5	Slfn5	M WT	S4	27.5008	22.6359	4.86493	4.81736		F WT	70	3.49326	0.0175589	0.987903
A08	Cy5	Slfn5			27.3542	22.5844	4.7698			F KO	S9	4.26851	0.79281	0.577219	3.24139	3.49326	0.239572
A09	Cy5	Slfn5	M WT	S6	28.9942	23.3815	5.61268	5.72762		F KO	S10	3.25001	-0.225691	1.16934
A10	Cy5	Slfn5			29.0112	23.1687	5.84255			F KO	9	2.06781	-1.40789	2.6535
A11	Cy5	Slfn5	M WT	S7	27.6537	22.7996	4.85416	5.01837		F KO	67	-0.108498	-3.5842	11.9936
A12	Cy5	Slfn5			28.0825	22.8999	5.18257			F KO	68	2.41398	-1.06172	2.08742
D01	Cy5	Slfn5	F KO	S9	27.3895	23.2752	4.11436	4.26851		F KO	76	0.875984	-2.59972	6.06168
D02	Cy5	Slfn5			27.5607	23.138	4.42266			F KO	78	1.46328	-2.01242	4.03457
D03	Cy5	Slfn5	F KO	S10	26.0207	22.5261	3.49464	3.25001		F KO	92	3.23992	-0.235781	1.17754
D04	Cy5	Slfn5			25.7287	22.7233	3.00538			F KO	49	3.02816	-0.447536	1.36371
D05	Cy5	Slfn5	F WT	S11	27.5634	22.0654	5.49798	5.58807		F KO	58	3.10241	-0.373292	1.2953
D06	Cy5	Slfn5			27.8593	22.1811	5.67815
D07	Cy5	Slfn5	F WT	S12	25.8115	22.5479	3.2636	3.29542
D08	Cy5	Slfn5			25.7852	22.458	3.32725
D09	Cy5	Slfn5	F KO	9	25.9271	23.8148	2.11228	2.06781
D10	Cy5	Slfn5			25.9208	23.8974	2.02333
D11	Cy5	Slfn5	M KO	30	27.2354	23.4938	3.74162	3.61875
D12	Cy5	Slfn5			27.1314	23.6356	3.49588
G01	Cy5	Slfn5	M KO	35	28.1763	23.3267	4.84962	4.77266
G02	Cy5	Slfn5			28.0153	23.3196	4.69571
G03	Cy5	Slfn5	M KO	54	27.9214	24.0525	3.86885	3.76618
G04	Cy5	Slfn5			27.6487	23.9852	3.6635
H01	Cy5	Slfn5	F WT	65	27.1435	24.9309	2.21259	2.37822
H02	Cy5	Slfn5			27.2539	24.7101	2.54384
H03	Cy5	Slfn5	F KO	67	25.6555	25.787	-0.131546	-0.108498
H04	Cy5	Slfn5			25.7298	25.8153	-0.0854494
A01	Cy5	Slfn5	F KO	68	26.7622	24.3987	2.36356	2.41398
A02	Cy5	Slfn5			26.8346	24.3702	2.46441
A03	Cy5	Slfn5	F WT	69	27.1549	24.6996	2.45526	2.62354
A04	Cy5	Slfn5			27.1989	24.4071	2.79182
A05	Cy5	Slfn5	F WT	70	26.6829	23.1187	3.56417	3.49326
A06	Cy5	Slfn5			26.6352	23.2129	3.42235
A07	Cy5	Slfn5	F KO	76	25.0608	24.1307	0.930117	0.875984
A08	Cy5	Slfn5			25.148	24.3262	0.82185
A09	Cy5	Slfn5	F KO	78	28.4044	27.04	1.36437	1.46328
A10	Cy5	Slfn5			28.4948	26.9326	1.5622
A11	Cy5	Slfn5	F KO	92	26.3884	23.0788	3.30957	3.23992
A12	Cy5	Slfn5			26.264	23.0937	3.17027
D01	Cy5	Slfn5	M KO	11	28.0739	24.4943	3.57962	3.65115
D02	Cy5	Slfn5			27.8281	24.1054	3.72269
D03	Cy5	Slfn5	M WT	12	26.6387	23.5749	3.06374	3.10866
D04	Cy5	Slfn5			26.7295	23.5759	3.15358
D05	Cy5	Slfn5	M WT	37	28.7814	24.2578	4.52369	4.45249
D06	Cy5	Slfn5			28.6665	24.2852	4.38129
D07	Cy5	Slfn5	M WT	46	27.5891	23.2028	4.38637	4.34116
D08	Cy5	Slfn5			27.4707	23.1748	4.29595
D09	Cy5	Slfn5	M WT	63	26.319	22.4841	3.83494	3.79457
D10	Cy5	Slfn5			26.3261	22.5719	3.7542
D11	Cy5	Slfn5	F KO	49	25.6893	22.5849	3.10441	3.02816
D12	Cy5	Slfn5			25.7263	22.7744	2.95192
G01	Cy5	Slfn5	M WT	51	26.3797	22.2025	4.17713	4.19096
G02	Cy5	Slfn5			26.3947	22.1899	4.2048
G03	Cy5	Slfn5	M KO	53	28.4469	24.8545	3.59235	3.6759
G04	Cy5	Slfn5			28.3846	24.6252	3.75945
H01	Cy5	Slfn5	M WT	55	27.31	23.9916	3.31842	3.34658			Male	Ave. dCt	1.87249
H02	Cy5	Slfn5			27.2402	23.8655	3.37474				Slfn8	dCt	ddCt	Fold Change	Ave. Fold	Std dev	Ttest
H03	Cy5	Slfn5	F KO	58	26.4586	23.2465	3.21209	3.10241		M WT	44	1.898	0.0255058	0.982476	1.03562	0.265615
H04	Cy5	Slfn5			26.5062	23.5135	2.99273			M WT	65	2.21562	0.343122	0.788333
A01	FAM	Slfn8	M WT	44	26.2752	24.4186	1.85667	1.898		M WT	73	2.87112	0.998629	0.500475
A02	FAM	Slfn8			26.1773	24.238	1.93933			M WT	78	2.3264	0.45391	0.730061
A03	FAM	Slfn8	M WT	65	27.8458	25.4906	2.3552	2.21562		M WT	81	2.00823	0.135741	0.910202
A04	FAM	Slfn8			27.6843	25.6083	2.07604			M WT	85	1.95616	0.0836631	0.943659
A05	FAM	Slfn8	M KO	67	26.6332	25.2578	1.37539	1.60266		M WT	87	1.42642	-0.446074	1.36233
A06	FAM	Slfn8			27.0563	25.2263	1.82992			M WT	90	1.53642	-0.336076	1.26232
A07	FAM	Slfn8	M WT	73	29.16	26.083	3.07704	2.87112		M WT	96	1.57124	-0.301253	1.23221
A08	FAM	Slfn8			28.924	26.2588	2.66521			M WT	98	1.393	-0.479497	1.39426
A09	FAM	Slfn8	M KO	74	26.9412	24.7344	2.20682	2.15139		M WT	S1	2.14185	0.269353	0.829692
A10	FAM	Slfn8			27.0959	25	2.09596			M WT	S4	1.83939	-0.0331009	1.02321
A11	FAM	Slfn8	M WT	78	33.1201	30.4605	2.65963	2.3264		M WT	S6	1.92271	0.050212	0.965794
A12	FAM	Slfn8			32.5135	30.5203	1.99318			M WT	S7	1.73363	-0.13886	1.10103
D01	FAM	Slfn8	M WT	81	27.0813	25.1867	1.89462	2.00823		M WT	12	1.35385	-0.518647	1.43261
D02	FAM	Slfn8			26.8389	24.717	2.12185			M WT	37	2.54352	0.671028	0.628059
D03	FAM	Slfn8	M WT	85	27.2318	25.0639	2.16788	1.95616		M WT	46	1.95301	0.0805136	0.945721
D04	FAM	Slfn8			27.138	25.3936	1.74444			M WT	63	1.58903	-0.28346	1.21711
D05	FAM	Slfn8	M KO	87	27.4188	24.9089	2.50988	2.53923		M WT	51	1.77889	-0.0936039	1.06703
D06	FAM	Slfn8			27.3361	24.7675	2.56858			M WT	55	1.39139	-0.481105	1.39581
D07	FAM	Slfn8	M KO	88	30.0219	28.1515	1.87034	1.89711		M KO	67	1.60266	-0.269835	1.20567	0.892216	0.391417	0.218148
D08	FAM	Slfn8			29.9864	28.0625	1.92389			M KO	74	2.15139	0.2789	0.824219
D09	FAM	Slfn8	M KO	86	24.441	23.1634	1.27758	1.36337		M KO	87	2.53923	0.666736	0.62993
D10	FAM	Slfn8			24.7353	23.2861	1.44917			M KO	88	1.89711	0.0246202	0.983079
D11	FAM	Slfn8	M WT	87	23.8348	22.6844	1.15032	1.42642		M KO	86	1.36337	-0.509121	1.42318
D12	FAM	Slfn8			24.3026	22.6001	1.70252			M KO	5	1.68138	-0.191109	1.14164
G01	FAM	Slfn8	M WT	90	24.2649	22.9668	1.29809	1.53642		M KO	9	2.47348	0.600989	0.659302
G02	FAM	Slfn8			24.3952	22.6205	1.77474			M KO	S2	3.77782	1.90533	0.266956
G03	FAM	Slfn8	M WT	96	27.9954	26.4352	1.56022	1.57124		M KO	30	1.68673	-0.18576	1.13742
G04	FAM	Slfn8			27.9468	26.3646	1.58226			M KO	35	3.00227	1.12977	0.456988
H01	FAM	Slfn8	M WT	98	25.4058	24.1556	1.25021	1.393		M KO	54	2.78979	0.917299	0.529499
H02	FAM	Slfn8			25.5472	24.0114	1.53579			M KO	11	1.21379	-0.658709	1.57867
H03	FAM	Slfn8	M KO	5	27.0457	25.3207	1.72502	1.68138		M KO	53	2.26415	0.391659	0.762253
H04	FAM	Slfn8			27.0323	25.3945	1.63775
A01	FAM	Slfn8	M KO	9	25.3232	23.059	2.2642	2.47348			Female	Ave. dCt	1.57305
A02	FAM	Slfn8			25.7377	23.0549	2.68277				Slfn8	dCt	ddCt	Fold Change	Ave. Fold	Std dev	Ttest
A03	FAM	Slfn8	M WT	S1	25.9054	23.7843	2.12107	2.14185		F WT	S11	1.91028	0.337229	0.79156	1.02124	0.231811
A04	FAM	Slfn8			25.7634	23.6008	2.16263			F WT	S12	1.92076	0.347711	0.78583
A05	FAM	Slfn8	M KO	S2	26.3065	22.7541	3.55242	3.77782		F WT	65	1.48197	-0.091083	1.06517
A06	FAM	Slfn8			26.6783	22.6751	4.00322			F WT	69	1.3816	-0.191448	1.14191
A07	FAM	Slfn8	M WT	S4	24.517	22.6359	1.8811	1.83939		F WT	70	1.17064	-0.402409	1.32171
A08	FAM	Slfn8			24.3821	22.5844	1.79768			F KO	S9	1.74315	0.170103	0.888779	0.945474	0.299597	0.630137
A09	FAM	Slfn8	M WT	S6	25.2206	23.3815	1.83913	1.92271		F KO	S10	1.34539	-0.227659	1.17093
A10	FAM	Slfn8			25.1749	23.1687	2.00629			F KO	9	2.28294	0.709883	0.61137
A11	FAM	Slfn8	M WT	S7	24.5879	22.7996	1.7883	1.73363		F KO	67	1.34353	-0.229517	1.17244
A12	FAM	Slfn8			24.5789	22.8999	1.67897			F KO	68	1.79462	0.221572	0.85763
D01	FAM	Slfn8	F KO	S9	24.8604	23.2752	1.58526	1.74315		F KO	76	1.6409	0.0678506	0.954058
D02	FAM	Slfn8			25.0391	23.138	1.90105			F KO	78	1.45491	-0.118147	1.08534
D03	FAM	Slfn8	F KO	S10	24.0753	22.5261	1.54927	1.34539		F KO	92	0.973967	-0.599085	1.51476
D04	FAM	Slfn8			23.8649	22.7233	1.14152			F KO	49	2.32891	0.755861	0.592193
D05	FAM	Slfn8	F WT	S11	23.9294	22.0654	1.86402	1.91028		F KO	58	2.29271	0.719653	0.607243
D06	FAM	Slfn8			24.1377	22.1811	1.95654
D07	FAM	Slfn8	F WT	S12	24.4936	22.5479	1.9457	1.92076
D08	FAM	Slfn8			24.3538	22.458	1.89582
D09	FAM	Slfn8	F KO	9	26.1188	23.8148	2.30403	2.28294
D10	FAM	Slfn8			26.1593	23.8974	2.26184
D11	FAM	Slfn8	M KO	30	25.2738	23.4938	1.78004	1.68673
D12	FAM	Slfn8			25.229	23.6356	1.59343
G01	FAM	Slfn8	M KO	35	26.438	23.3267	3.11134	3.00227
G02	FAM	Slfn8			26.2128	23.3196	2.89319
G03	FAM	Slfn8	M KO	54	26.8677	24.0525	2.8152	2.78979
G04	FAM	Slfn8			26.7495	23.9852	2.76438
H01	FAM	Slfn8	F WT	65	26.2812	24.9309	1.35025	1.48197
H02	FAM	Slfn8			26.3238	24.7101	1.61368
H03	FAM	Slfn8	F KO	67	27.2006	25.787	1.41358	1.34353
H04	FAM	Slfn8			27.0888	25.8153	1.27349
A01	FAM	Slfn8	F KO	68	26.1491	24.3987	1.75044	1.79462
A02	FAM	Slfn8			26.209	24.3702	1.83881
A03	FAM	Slfn8	F WT	69	25.8825	24.6996	1.18293	1.3816
A04	FAM	Slfn8			25.9874	24.4071	1.58028
A05	FAM	Slfn8	F WT	70	24.3814	23.1187	1.26269	1.17064
A06	FAM	Slfn8			24.2915	23.2129	1.07859
A07	FAM	Slfn8	F KO	76	25.8254	24.1307	1.69468	1.6409
A08	FAM	Slfn8			25.9133	24.3262	1.58712
A09	FAM	Slfn8	F KO	78	28.4418	27.04	1.40181	1.45491
A10	FAM	Slfn8			28.4406	26.9326	1.508
A11	FAM	Slfn8	F KO	92	24.0561	23.0788	0.977231	0.973967
A12	FAM	Slfn8			24.0644	23.0937	0.970704
D01	FAM	Slfn8	M KO	11	25.5848	24.4943	1.09047	1.21379
D02	FAM	Slfn8			25.4425	24.1054	1.3371
D03	FAM	Slfn8	M WT	12	24.9489	23.5749	1.37402	1.35385
D04	FAM	Slfn8			24.9096	23.5759	1.33367
D05	FAM	Slfn8	M WT	37	26.919	24.2578	2.6612	2.54352
D06	FAM	Slfn8			26.7111	24.2852	2.42584
D07	FAM	Slfn8	M WT	46	25.1615	23.2028	1.95875	1.95301
D08	FAM	Slfn8			25.122	23.1748	1.94726
D09	FAM	Slfn8	M WT	63	24.0972	22.4841	1.61315	1.58903
D10	FAM	Slfn8			24.1368	22.5719	1.56492
D11	FAM	Slfn8	F KO	49	24.97	22.5849	2.38514	2.32891
D12	FAM	Slfn8			25.0471	22.7744	2.27269
G01	FAM	Slfn8	M WT	51	23.9315	22.2025	1.72895	1.77889
G02	FAM	Slfn8			24.0187	22.1899	1.82883
G03	FAM	Slfn8	M KO	53	27.0737	24.8545	2.21915	2.26415
G04	FAM	Slfn8			26.9344	24.6252	2.30916
H01	FAM	Slfn8	M WT	55	25.4149	23.9916	1.42335	1.39139			Male	Ave. dCt	1.5131
H02	FAM	Slfn8			25.2249	23.8655	1.35943				Slfn9	dCt	ddCt	Fold Change	Ave. Fold	Std dev	Ttest
H03	FAM	Slfn8	F KO	58	25.6347	23.2465	2.38819	2.29271		M WT	44	1.20006	-0.313035	1.24232	1.03209	0.2569
H04	FAM	Slfn8			25.7107	23.5135	2.19722			M WT	65	1.66904	0.155941	0.897547
B01	Cy5	Slfn9	M WT	44	25.6576	24.4186	1.239	1.20006		M WT	73	2.17202	0.658918	0.633353
B02	Cy5	Slfn9			25.3991	24.238	1.16113			M WT	78	2.18984	0.676744	0.625575
B03	Cy5	Slfn9	M WT	65	27.1874	25.4906	1.69686	1.66904		M WT	81	1.45073	-0.062374	1.04418
B04	Cy5	Slfn9			27.2495	25.6083	1.64122			M WT	85	1.39797	-0.115131	1.08307
B05	Cy5	Slfn9	M KO	67	26.6552	25.2578	1.39735	1.37511		M WT	87	0.966037	-0.547062	1.46111
B06	Cy5	Slfn9			26.5792	25.2263	1.35287			M WT	90	1.22871	-0.284385	1.21789
B07	Cy5	Slfn9	M WT	73	28.3316	26.083	2.24864	2.17202		M WT	96	1.7136	0.200505	0.870246
B08	Cy5	Slfn9			28.3542	26.2588	2.09539			M WT	98	1.12363	-0.389471	1.30991
B09	Cy5	Slfn9	M KO	74	26.9677	24.7344	2.23337	2.14249		M WT	S1	1.69932	0.186221	0.878905
B10	Cy5	Slfn9			27.0516	25	2.0516			M WT	S4	1.65403	0.140934	0.906932
B11	Cy5	Slfn9	M WT	78	32.6015	30.4605	2.14096	2.18984		M WT	S6	1.56498	0.0518836	0.964676
B12	Cy5	Slfn9			32.7591	30.5203	2.23873			M WT	S7	1.45998	-0.0531225	1.03751
E01	Cy5	Slfn9	M WT	81	26.4463	25.1867	1.25956	1.45073		M WT	12	1.39046	-0.122639	1.08872
E02	Cy5	Slfn9			26.3589	24.717	1.64189			M WT	37	2.26253	0.749434	0.594837
E03	Cy5	Slfn9	M WT	85	26.5586	25.0639	1.49476	1.39797		M WT	46	1.67419	0.16109	0.894349
E04	Cy5	Slfn9			26.6947	25.3936	1.30118			M WT	63	1.28052	-0.23258	1.17493
E05	Cy5	Slfn9	M KO	87	27.0856	24.9089	2.17666	2.21047		M WT	51	0.908476	-0.604623	1.52058
E06	Cy5	Slfn9			27.0118	24.7675	2.24429			M WT	55	1.25585	-0.257247	1.1952
E07	Cy5	Slfn9	M KO	88	30.453	28.1515	2.30147	2.34206		M KO	67	1.37511	-0.137987	1.10037	0.710295	0.329905	0.00366641
E08	Cy5	Slfn9			30.4452	28.0625	2.38265			M KO	74	2.14249	0.629386	0.646451
E09	Cy5	Slfn9	M KO	86	24.1161	23.1634	0.95273	0.896773		M KO	87	2.21047	0.697375	0.616693
E10	Cy5	Slfn9			24.127	23.2861	0.840817			M KO	88	2.34206	0.828959	0.562935
E11	Cy5	Slfn9	M WT	87	23.5229	22.6844	0.838457	0.966037		M KO	86	0.896773	-0.616326	1.53297
E12	Cy5	Slfn9			23.6937	22.6001	1.09362			M KO	5	1.71394	0.200841	0.870043
G05	Cy5	Slfn9	M WT	90	24.0164	22.9668	1.04967	1.22871		M KO	9	2.1386	0.625499	0.648195
G06	Cy5	Slfn9			24.0282	22.6205	1.40776			M KO	S2	3.43308	1.91998	0.264259
G07	Cy5	Slfn9	M WT	96	28.1927	26.4352	1.75751	1.7136		M KO	30	2.38819	0.875087	0.545221
G08	Cy5	Slfn9			28.0343	26.3646	1.6697			M KO	35	2.70327	1.19017	0.438252
H05	Cy5	Slfn9	M WT	98	25.2531	24.1556	1.09753	1.12363		M KO	54	2.44365	0.930546	0.52466
H06	Cy5	Slfn9			25.1611	24.0114	1.14972			M KO	11	1.60622	0.0931244	0.93749
H07	Cy5	Slfn9	M KO	5	26.9746	25.3207	1.65395	1.71394		M KO	53	2.38533	0.872228	0.546303
H08	Cy5	Slfn9			27.1684	25.3945	1.77393
B01	Cy5	Slfn9	M KO	9	25.1718	23.059	2.11285	2.1386			Female	Ave. dCt	1.31321
B02	Cy5	Slfn9			25.2193	23.0549	2.16435				Slfn9	dCt	ddCt	Fold Change	Ave. Fold	Std dev	Ttest
B03	Cy5	Slfn9	M WT	S1	25.3562	23.7843	1.57188	1.69932		F WT	S11	1.97958	0.666369	0.630091	1.11962	0.643129
B04	Cy5	Slfn9			25.4276	23.6008	1.82676			F WT	S12	1.78683	0.473621	0.720155
B05	Cy5	Slfn9	M KO	S2	26.1659	22.7541	3.41182	3.43308		F WT	65	1.64801	0.334805	0.792891
B06	Cy5	Slfn9			26.1294	22.6751	3.45433			F WT	69	0.962727	-0.350483	1.27499
B07	Cy5	Slfn9	M WT	S4	24.2608	22.6359	1.62495	1.65403		F WT	70	0.188897	-1.12431	2.17998
B08	Cy5	Slfn9			24.2675	22.5844	1.68311			F KO	S9	2.28615	0.972938	0.509467	0.946307	0.489911	0.569121
B09	Cy5	Slfn9	M WT	S6	24.9405	23.3815	1.55895	1.56498		F KO	S10	1.64424	0.331028	0.79497
B10	Cy5	Slfn9			24.7397	23.1687	1.57102			F KO	9	2.42918	1.11597	0.461381
B11	Cy5	Slfn9	M WT	S7	24.3253	22.7996	1.52572	1.45998		F KO	67	1.59739	0.284179	0.821209
B12	Cy5	Slfn9			24.2941	22.8999	1.39423			F KO	68	1.13093	-0.182278	1.13467
E01	Cy5	Slfn9	F KO	S9	25.5355	23.2752	2.26035	2.28615		F KO	76	1.02345	-0.28976	1.22244
E02	Cy5	Slfn9			25.45	23.138	2.31195			F KO	78	1.40759	0.0943824	0.936673
E03	Cy5	Slfn9	F KO	S10	24.2156	22.5261	1.6895	1.64424		F KO	92	0.20285	-1.11036	2.159
E04	Cy5	Slfn9			24.3223	22.7233	1.59897			F KO	49	1.88471	0.571501	0.672916
E05	Cy5	Slfn9	F WT	S11	24.0945	22.0654	2.02908	1.97958		F KO	58	1.72759	0.414379	0.750343
E06	Cy5	Slfn9			24.1112	22.1811	1.93008
E07	Cy5	Slfn9	F WT	S12	24.3965	22.5479	1.84861	1.78683
E08	Cy5	Slfn9			24.183	22.458	1.72506
E09	Cy5	Slfn9	F KO	9	26.1732	23.8148	2.35841	2.42918
E10	Cy5	Slfn9			26.3974	23.8974	2.49995
E11	Cy5	Slfn9	M KO	30	25.8806	23.4938	2.38676	2.38819
E12	Cy5	Slfn9			26.0252	23.6356	2.38961
G05	Cy5	Slfn9	M KO	35	26.0405	23.3267	2.71384	2.70327
G06	Cy5	Slfn9			26.0123	23.3196	2.6927
G07	Cy5	Slfn9	M KO	54	26.3987	24.0525	2.34619	2.44365
G08	Cy5	Slfn9			26.5263	23.9852	2.5411
H05	Cy5	Slfn9	F WT	65	26.6058	24.9309	1.67482	1.64801
H06	Cy5	Slfn9			26.3313	24.7101	1.62121
H07	Cy5	Slfn9	F KO	67	27.4276	25.787	1.64055	1.59739
H08	Cy5	Slfn9			27.3695	25.8153	1.55423
B01	Cy5	Slfn9	F KO	68	25.5543	24.3987	1.15561	1.13093
B02	Cy5	Slfn9			25.4764	24.3702	1.10625
B03	Cy5	Slfn9	F WT	69	25.6616	24.6996	0.962021	0.962727
B04	Cy5	Slfn9			25.3705	24.4071	0.963433
B05	Cy5	Slfn9	F WT	70	23.2559	23.1187	0.137213	0.188897
B06	Cy5	Slfn9			23.4534	23.2129	0.240581
B07	Cy5	Slfn9	F KO	76	25.2236	24.1307	1.09291	1.02345
B08	Cy5	Slfn9			25.2802	24.3262	0.953987
B09	Cy5	Slfn9	F KO	78	28.3493	27.04	1.30936	1.40759
B10	Cy5	Slfn9			28.4384	26.9326	1.50583
B11	Cy5	Slfn9	F KO	92	23.1742	23.0788	0.095372	0.20285
B12	Cy5	Slfn9			23.404	23.0937	0.310328
E01	Cy5	Slfn9	M KO	11	26.0211	24.4943	1.52685	1.60622
E02	Cy5	Slfn9			25.791	24.1054	1.6856
E03	Cy5	Slfn9	M WT	12	24.9345	23.5749	1.35959	1.39046
E04	Cy5	Slfn9			24.9972	23.5759	1.42133
E05	Cy5	Slfn9	M WT	37	26.5247	24.2578	2.26698	2.26253
E06	Cy5	Slfn9			26.5433	24.2852	2.25809
E07	Cy5	Slfn9	M WT	46	24.8857	23.2028	1.68296	1.67419
E08	Cy5	Slfn9			24.8402	23.1748	1.66542
E09	Cy5	Slfn9	M WT	63	23.6787	22.4841	1.19461	1.28052
E10	Cy5	Slfn9			23.9383	22.5719	1.36643
E11	Cy5	Slfn9	F KO	49	24.5407	22.5849	1.95587	1.88471
E12	Cy5	Slfn9			24.5879	22.7744	1.81356
G05	Cy5	Slfn9	M WT	51	23.0769	22.2025	0.874363	0.908476
G06	Cy5	Slfn9			23.1325	22.1899	0.94259
G07	Cy5	Slfn9	M KO	53	27.2311	24.8545	2.37654	2.38533
G08	Cy5	Slfn9			27.0193	24.6252	2.39411
H05	Cy5	Slfn9	M WT	55	25.2292	23.9916	1.23764	1.25585
H06	Cy5	Slfn9			25.1396	23.8655	1.27407
H07	Cy5	Slfn9	F KO	58	25.0892	23.2465	1.84273	1.72759
H08	Cy5	Slfn9			25.1259	23.5135	1.61245
C01	HEX	RPLP0			24.1473
C02	HEX	RPLP0			24.2188
C03	HEX	RPLP0			25.1191
C04	HEX	RPLP0			25.319
C05	HEX	RPLP0			24.3627
C06	HEX	RPLP0			24.3424
C07	HEX	RPLP0			26.0167
C08	HEX	RPLP0			26.1192
C09	HEX	RPLP0			25.1395
C10	HEX	RPLP0			24.6774
C11	HEX	RPLP0			30.1775
C12	HEX	RPLP0			30.7088
F01	HEX	RPLP0			24.7154
F02	HEX	RPLP0			24.7855
F03	HEX	RPLP0			25.0394
F04	HEX	RPLP0			25.1958
F05	HEX	RPLP0			24.6559
F06	HEX	RPLP0			24.659
F07	HEX	RPLP0			27.6337
F08	HEX	RPLP0			27.7142
F09	HEX	RPLP0			23.0178
F10	HEX	RPLP0			23.0442
F11	HEX	RPLP0			22.4888
F12	HEX	RPLP0			22.7441
G09	HEX	RPLP0			22.3271
G10	HEX	RPLP0			22.5098
G11	HEX	RPLP0			26.3211
G12	HEX	RPLP0			26.5513
H09	HEX	RPLP0			23.8953
H10	HEX	RPLP0			23.8237
H11	HEX	RPLP0			25.0428
H12	HEX	RPLP0			25.3289
